# Supplementary material for: Eukaryotic plankton species diversity and community structure in the Xiao Jiang River (the primary tributary of Upper Yangtze River), Yunnan
Source: PeerJ journal article supplement (doi:10.7717/peerj.17972), 2024-09-13
Supplement: Table_S1.xlsx [file Table_S1.xlsx]

## Sheet: Sheet1
ASV_ID	Dry_XJ01	Dry_XJ02	Dry_XJ03	Dry_XJ04	Dry_XJ05	Dry_XJ06	Dry_XJ07	Dry_XJ08	Dry_DBH09	Dry_DBH10	Dry_DBH11	Dry_DBH12	Dry_DBH13	Dry_DBH15	Dry_KH16	Dry_KH17	Dry_KH18	Dry_KH19	Dry_KH20	Wet_XJ01	Wet_XJ02	Wet_XJ03	Wet_XJ04	Wet_XJ05	Wet_XJ06	Wet_XJ07	Wet_XJ08	Wet_DBH09	Wet_DBH10	Wet_DBH11	Wet_DBH12	Wet_DBH13	Wet_DBH14	Wet_DBH15	Wet_KH16	Wet_KH17	Wet_KH18	Wet_KH19	Wet_KH20	phylum	genus	species
ASV9994	0	0	0	0	0	0	0	0	0	0	0	0	0	0	0	0	0	0	0	0	0	0	0	0	0	0	0	0	0	0	0	0	0	0	6	0	0	0	0	p__Apicomplexa	g__Leidyana	s__Leidyana_migrator
ASV9991	0	0	0	0	0	0	0	0	0	0	0	0	0	0	0	0	0	0	0	0	0	0	0	0	0	0	0	0	0	0	0	0	0	0	6	0	0	0	0	p__Chlorophyta	g__Chloromonas	s__Chloromonas_nivalis
ASV9987	0	0	0	0	0	0	0	0	0	0	0	0	0	0	0	0	0	0	0	0	0	0	0	0	0	0	0	0	0	0	0	0	0	0	6	0	0	0	0	p__Apicomplexa	g__Syncystis	s__Syncystis_mirabilis
ASV9985	0	0	0	0	0	0	0	0	0	0	0	0	0	0	0	0	0	0	0	0	0	0	0	0	0	0	0	0	0	0	0	0	0	6	0	0	0	0	0	p__Sarcomastigophora	g__Korotnevella	s__Korotnevella_jeppesenii
ASV9980	0	0	0	0	0	0	0	0	0	0	0	0	0	0	0	0	0	0	0	0	0	0	0	0	0	0	0	0	0	0	0	0	0	6	0	0	0	0	0	p__Ciliophora	g__Steinia	s__Steinia_sphagnicola
ASV998	0	0	0	0	0	0	0	0	0	0	0	0	0	0	0	0	0	0	0	0	98	0	62	59	74	90	97	46	0	0	0	0	0	0	11	0	0	0	0	p__Chlorophyta	g__Spermatozopsis	s__Spermatozopsis_similis
ASV9979	0	0	0	0	0	0	0	0	0	0	0	0	0	0	0	0	0	0	0	0	0	0	0	0	0	0	0	0	0	0	0	0	0	6	0	0	0	0	0	p__Chlorophyta	g__Spongiochloris	s__Spongiochloris_spongiosa
ASV9977	0	0	0	0	0	0	0	0	0	0	0	0	0	0	0	0	0	0	0	0	0	0	0	0	0	0	0	0	0	0	0	0	0	6	0	0	0	0	0	p__Chrysophyta	g__Hydrurus	s__Hydrurus_foetidus
ASV9976	0	0	0	0	0	0	0	0	0	0	0	0	0	0	0	0	0	0	0	0	0	0	0	0	0	0	0	0	0	0	0	0	0	6	0	0	0	0	0	p__Chlorophyta	g__Oedogonium	s__Oedogonium_cylindrosporum
ASV997	0	0	0	0	0	0	0	0	0	423	0	0	0	0	0	0	0	0	0	0	0	0	0	0	0	0	0	0	0	0	102	12	0	0	0	0	0	0	0	p__Ciliophora	g__Ichthyophthirius	s__Ichthyophthirius_multifiliis
ASV9962	0	0	0	0	0	0	0	0	0	0	0	0	0	0	0	0	0	0	0	0	0	0	0	0	0	0	0	0	0	0	0	6	0	0	0	0	0	0	0	p__Euglenophyta	g__Strombomonas	s__Strombomonas_balvayi
ASV9960	0	0	0	0	0	0	0	0	0	0	0	0	0	0	0	0	0	0	0	0	0	0	0	0	0	0	0	0	0	0	0	6	0	0	0	0	0	0	0	p__Sarcomastigophora	g__Cryptodifflugia	s__Cryptodifflugia_oviformis
ASV9958	0	0	0	0	0	0	0	0	0	0	0	0	0	0	0	0	0	0	0	0	0	0	0	0	0	0	0	0	0	0	6	0	0	0	0	0	0	0	0	p__Euglenophyta	g__Lepocinclis	s__Lepocinclis_tripteris
ASV9951	0	0	0	0	0	0	0	0	0	0	0	0	0	0	0	0	0	0	0	0	0	0	0	0	0	0	0	0	0	0	6	0	0	0	0	0	0	0	0	p__Cryptophyta	g__Goniomonas	s__Cryptomonas_ovata
ASV9945	0	0	0	0	0	0	0	0	0	0	0	0	0	0	0	0	0	0	0	0	0	0	0	0	0	0	0	0	0	0	6	0	0	0	0	0	0	0	0	p__Sarcomastigophora	g__Amoeba	s__Amoeba_leningradensis
ASV9942	0	0	0	0	0	0	0	0	0	0	0	0	0	0	0	0	0	0	0	0	0	0	0	0	0	0	0	0	0	0	6	0	0	0	0	0	0	0	0	p__Sarcomastigophora	g__Flamella	s__Flamella_piscinae
ASV9941	0	0	0	0	0	0	0	0	0	0	0	0	0	0	0	0	0	0	0	0	0	0	0	0	0	0	0	0	0	6	0	0	0	0	0	0	0	0	0	p__Ciliophora	g__Hemiamphisiella	s__Hemiamphisiella_terricola
ASV9940	0	0	0	0	0	0	0	0	0	0	0	0	0	0	0	0	0	0	0	0	0	0	0	0	0	0	0	0	0	6	0	0	0	0	0	0	0	0	0	p__Ciliophora	g__Hemicycliostyla	s__Hemicycliostyla_sphagni
ASV9938	0	0	0	0	0	0	0	0	0	0	0	0	0	0	0	0	0	0	0	0	0	0	0	0	0	0	0	0	0	6	0	0	0	0	0	0	0	0	0	p__Sarcomastigophora	g__Ichthyobodo	s__Ichthyobodo_necator
ASV9937	0	0	0	0	0	0	0	0	0	0	0	0	0	0	0	0	0	0	0	0	0	0	0	0	0	0	0	0	0	6	0	0	0	0	0	0	0	0	0	p__Apicomplexa	g__Cryptosporidium	s__Cryptosporidium_muris
ASV9935	0	0	0	0	0	0	0	0	0	0	0	0	0	0	0	0	0	0	0	0	0	0	0	0	0	0	0	0	0	6	0	0	0	0	0	0	0	0	0	p__Sarcomastigophora	g__Neobodo	s__Neobodo_designis
ASV9929	0	0	0	0	0	0	0	0	0	0	0	0	0	0	0	0	0	0	0	0	0	0	0	0	0	0	0	6	0	0	0	0	0	0	0	0	0	0	0	p__Chlorophyta	g__Ettlia	s__Ettlia_minuta
ASV9927	0	0	0	0	0	0	0	0	0	0	0	0	0	0	0	0	0	0	0	0	0	0	0	0	0	0	0	6	0	0	0	0	0	0	0	0	0	0	0	p__Ciliophora	g__Placus	s__Placus_salinus
ASV9923	0	0	0	0	0	0	0	0	0	0	0	0	0	0	0	0	0	0	0	0	0	0	0	0	0	0	0	2	0	0	0	0	0	0	0	0	0	0	4	p__Sarcomastigophora	g__Dictyostelium	s__Dictyostelium_mucoroides
ASV9917	0	0	0	0	0	0	0	0	0	0	0	0	0	0	0	0	0	0	0	0	0	0	0	0	0	0	0	6	0	0	0	0	0	0	0	0	0	0	0	p__Cryptophyta	g__Hemiselmis	s__Hemiselmis_brunnescens
ASV9911	0	0	0	0	0	0	0	0	0	0	0	0	0	0	0	0	0	0	0	0	0	0	0	0	0	0	0	6	0	0	0	0	0	0	0	0	0	0	0	p__Sarcomastigophora	g__Entamoeba	s__Entamoeba_equi
ASV9904	0	0	0	0	0	0	0	0	0	0	0	0	0	0	0	0	0	0	0	0	0	0	0	0	0	0	0	6	0	0	0	0	0	0	0	0	0	0	0	p__Euglenophyta	g__Rhabdomonas	s__Rhabdomonas_incurva
ASV9897	0	0	0	0	0	0	0	6	0	0	0	0	0	0	0	0	0	0	0	0	0	0	0	0	0	0	0	0	0	0	0	0	0	0	0	0	0	0	0	p__Ciliophora	g__Trichodina	s__Trichodina_meretricis
ASV9896	0	0	0	0	0	0	0	6	0	0	0	0	0	0	0	0	0	0	0	0	0	0	0	0	0	0	0	0	0	0	0	0	0	0	0	0	0	0	0	p__Sarcomastigophora	g__Rhynchomonas	s__Rhynchomonas_nasuta
ASV9884	0	0	0	0	0	0	6	0	0	0	0	0	0	0	0	0	0	0	0	0	0	0	0	0	0	0	0	0	0	0	0	0	0	0	0	0	0	0	0	p__Sarcomastigophora	g__Korotnevella	s__Korotnevella_jeppesenii
ASV9882	0	0	0	0	0	0	6	0	0	0	0	0	0	0	0	0	0	0	0	0	0	0	0	0	0	0	0	0	0	0	0	0	0	0	0	0	0	0	0	p__Sarcomastigophora	g__Entamoeba	s__Entamoeba_equi
ASV9880	0	0	0	0	0	0	6	0	0	0	0	0	0	0	0	0	0	0	0	0	0	0	0	0	0	0	0	0	0	0	0	0	0	0	0	0	0	0	0	p__Chrysophyta	g__Hibberdia	s__Hibberdia_magna
ASV988	0	0	0	0	0	0	0	22	0	0	0	0	0	0	0	0	0	0	0	6	107	0	73	77	66	80	24	24	56	7	0	0	0	0	0	0	0	0	0	p__Chlorophyta	g__Rotundella	s__Rotundella_rotunda
ASV9873	0	0	0	0	0	0	6	0	0	0	0	0	0	0	0	0	0	0	0	0	0	0	0	0	0	0	0	0	0	0	0	0	0	0	0	0	0	0	0	p__Ciliophora	g__Eurystomatella	s__Eurystomatella_sinica
ASV9863	6	0	0	0	0	0	0	0	0	0	0	0	0	0	0	0	0	0	0	0	0	0	0	0	0	0	0	0	0	0	0	0	0	0	0	0	0	0	0	p__Sarcomastigophora	g__Diplonema	s__Diplonema_ambulator
ASV985	0	0	0	0	0	0	0	61	141	219	0	0	0	0	0	0	0	0	0	0	12	0	0	0	0	28	0	0	0	0	40	42	0	0	0	0	0	0	0	p__Rotifera	g__Lepadella	s__Lepadella_patella
ASV9840	0	0	0	0	0	0	0	0	0	6	0	0	0	0	0	0	0	0	0	0	0	0	0	0	0	0	0	0	0	0	0	0	0	0	0	0	0	0	0	p__Cryptophyta	g__Goniomonas	s__Cryptomonas_pyrenoidifera
ASV984	0	0	95	0	184	0	0	0	0	54	0	0	0	0	0	0	0	0	0	0	0	0	0	0	0	0	0	0	0	0	0	75	0	60	76	0	0	0	0	p__Chlorophyta	g__Micractinium	s__Micractinium_pusillum
ASV9832	0	0	0	0	0	0	0	0	0	6	0	0	0	0	0	0	0	0	0	0	0	0	0	0	0	0	0	0	0	0	0	0	0	0	0	0	0	0	0	p__Ciliophora	g__Diophrys	s__Diophrys_oligothrix
ASV983	0	0	0	0	0	0	0	0	0	0	0	0	0	0	0	0	0	0	0	0	53	0	29	20	0	24	24	0	0	0	0	0	0	0	14	33	266	82	0	p__Chlorophyta	g__Monomastix	s__Monomastix_minuta
ASV9817	0	0	0	0	0	0	0	0	0	0	0	0	0	0	0	0	0	0	0	0	0	0	0	0	0	0	7	0	0	0	0	0	0	0	0	0	0	0	0	p__Chlorophyta	g__Oocystella	s__Oocystella_oogama
ASV9815	0	0	0	0	0	0	0	0	0	0	0	0	0	0	0	0	0	0	0	0	0	0	0	0	0	0	7	0	0	0	0	0	0	0	0	0	0	0	0	p__Apicomplexa	g__Gregarina	s__Gregarina_ctenocephali
ASV9812	0	0	0	0	0	0	0	0	0	0	0	0	0	0	0	0	0	0	0	0	0	0	0	0	0	7	0	0	0	0	0	0	0	0	0	0	0	0	0	p__Ciliophora	g__Pseudonotohymena	s__Pseudonotohymena_antarctica
ASV981	0	0	0	0	0	0	0	0	0	0	0	0	484	0	0	0	0	0	0	0	0	0	0	0	0	0	0	0	0	0	33	0	0	0	0	0	0	28	0	p__Bacillariophyta	g__Cymbella	s__Cymbella_cistuliformis
ASV9796	0	0	0	0	0	0	0	0	0	0	0	0	0	0	0	0	0	0	0	0	0	0	0	7	0	0	0	0	0	0	0	0	0	0	0	0	0	0	0	p__Ciliophora	g__Urosoma	s__Urosoma_salmastra
ASV9794	0	0	0	0	0	0	0	0	0	0	0	0	0	0	0	0	0	0	0	0	0	0	0	7	0	0	0	0	0	0	0	0	0	0	0	0	0	0	0	p__Chlorophyta	g__Pseudomuriella	s__Pseudomuriella_schumacherensis
ASV9786	0	0	0	0	0	0	0	0	0	0	0	0	0	0	0	0	0	0	0	0	0	0	0	7	0	0	0	0	0	0	0	0	0	0	0	0	0	0	0	p__Sarcomastigophora	g__Stylochlamydium	s__Stylochlamydium_venustum
ASV9781	0	0	0	0	0	0	0	0	0	0	0	0	0	0	0	0	0	0	0	0	0	0	7	0	0	0	0	0	0	0	0	0	0	0	0	0	0	0	0	p__Ciliophora	g__Euplotes	s__Euplotes_rariseta
ASV9779	0	0	0	0	0	0	0	0	0	0	0	0	0	0	0	0	0	0	0	0	0	7	0	0	0	0	0	0	0	0	0	0	0	0	0	0	0	0	0	p__Ciliophora	g__Bryophrya	s__Bryophrya_gemmea
ASV9778	0	0	0	0	0	0	0	0	0	0	0	0	0	0	0	0	0	0	0	0	0	7	0	0	0	0	0	0	0	0	0	0	0	0	0	0	0	0	0	p__Chlorophyta	g__Chaetopeltis	s__Chaetopeltis_orbicularis
ASV9774	0	0	0	0	0	0	0	0	0	0	0	0	0	0	0	0	0	0	0	0	0	7	0	0	0	0	0	0	0	0	0	0	0	0	0	0	0	0	0	p__Ciliophora	g__Loxophyllum	s__Loxophyllum_utriculariae
ASV9772	0	0	0	0	0	0	0	0	0	0	0	0	0	0	0	0	0	0	0	0	0	7	0	0	0	0	0	0	0	0	0	0	0	0	0	0	0	0	0	p__Chrysophyta	g__Ochromonas	s__Ochromonas_villosa
ASV977	0	0	0	0	0	0	0	0	0	21	0	0	0	0	0	0	0	0	0	0	4	0	6	0	0	6	6	0	0	0	31	11	0	0	0	0	25	10	430	p__Ciliophora	g__Strombidinopsis	s__Strombidinopsis_sinicum
ASV9760	0	0	0	0	0	0	0	0	0	0	0	0	0	0	0	0	0	0	0	0	0	7	0	0	0	0	0	0	0	0	0	0	0	0	0	0	0	0	0	p__Sarcomastigophora	g__Schizoplasmodium	s__Schizoplasmodium_cavostelioides
ASV9759	0	0	0	0	0	0	0	0	0	0	0	0	0	0	0	0	0	0	0	0	0	7	0	0	0	0	0	0	0	0	0	0	0	0	0	0	0	0	0	p__Apicomplexa	g__Ophryocystis	s__Ophryocystis_elektroscirrha
ASV9752	0	0	0	0	0	0	0	0	0	0	0	0	0	0	0	0	0	0	0	0	7	0	0	0	0	0	0	0	0	0	0	0	0	0	0	0	0	0	0	p__Sarcomastigophora	g__Pseudoparamoeba	s__Pseudoparamoeba_pagei
ASV975	0	0	0	0	0	0	0	0	0	0	0	0	0	0	0	0	0	0	0	0	45	26	126	209	146	0	0	0	0	0	0	0	0	0	0	0	0	0	0	p__Bacillariophyta	g__Thalassiosira	s__Thalassiosira_tenera
ASV9749	0	0	0	0	0	0	0	0	0	0	0	0	0	0	0	0	0	0	0	0	7	0	0	0	0	0	0	0	0	0	0	0	0	0	0	0	0	0	0	p__Sarcomastigophora	g__Lamproderma	s__Lamproderma_echinosporum
ASV9748	0	0	0	0	0	0	0	0	0	0	0	0	0	0	0	0	0	0	0	0	7	0	0	0	0	0	0	0	0	0	0	0	0	0	0	0	0	0	0	p__Chlorophyta	g__Chlamydomonas	s__Chlamydomonas_bacca
ASV9742	0	0	0	0	0	0	0	0	0	0	0	0	0	0	0	0	0	0	0	0	7	0	0	0	0	0	0	0	0	0	0	0	0	0	0	0	0	0	0	p__Euglenophyta	g__Discoplastis	s__Discoplastis_spathirhyncha
ASV974	0	0	0	0	0	0	0	0	0	0	0	0	0	0	0	0	0	0	0	0	34	0	7	38	22	85	62	88	32	19	29	64	0	0	0	0	60	14	0	p__Euglenophyta	g__Euglena	s__Euglena_agilis
ASV9736	0	0	0	0	0	0	0	0	0	0	0	0	0	0	0	0	0	0	0	0	7	0	0	0	0	0	0	0	0	0	0	0	0	0	0	0	0	0	0	p__Phaeophyta	g__Newhousia	s__Newhousia_imbricata
ASV9735	0	0	0	0	0	0	0	0	0	0	0	0	0	0	0	0	0	0	0	0	3	0	0	4	0	0	0	0	0	0	0	0	0	0	0	0	0	0	0	p__Sarcomastigophora	g__Monosiga	s__Monosiga_brevicollis
ASV9734	0	0	0	0	0	0	0	0	0	0	0	0	0	0	0	0	0	0	0	0	7	0	0	0	0	0	0	0	0	0	0	0	0	0	0	0	0	0	0	p__Dinophyta	g__Peridinium	s__Peridinium_willei
ASV9732	0	0	0	0	0	0	0	0	0	0	0	0	0	0	0	0	0	0	0	0	3	0	0	4	0	0	0	0	0	0	0	0	0	0	0	0	0	0	0	p__Euglenophyta	g__Distigma	s__Distigma_proteus
ASV973	0	87	0	68	109	66	0	0	0	0	0	0	0	0	0	0	0	0	0	0	0	0	0	0	0	0	0	0	0	225	0	0	0	0	0	0	0	0	0	p__Bacillariophyta	g__Thalassiosira	s__Thalassiosira_tenera
ASV972	0	0	154	0	178	0	0	0	0	0	0	0	0	195	28	0	0	0	0	0	0	0	0	0	0	0	0	0	0	0	0	0	0	0	0	0	0	0	0	p__Apicomplexa	g__Plasmodium	s__Plasmodium_ovale
ASV9719	0	0	0	0	0	0	0	0	0	0	0	0	0	0	0	0	0	0	0	0	0	0	0	0	0	0	0	0	0	0	0	0	0	0	0	0	0	0	7	p__Ciliophora	g__Paramecium	s__Paramecium_chlorelligerum
ASV9713	0	0	0	0	0	0	0	0	0	0	0	0	0	0	0	0	0	0	0	0	0	0	0	0	0	0	0	0	0	0	0	0	0	0	0	0	0	0	7	p__Ciliophora	g__Urosomoida	s__Urosomoida_paragiliformis
ASV9707	0	0	0	0	0	0	0	0	0	0	0	0	0	0	0	0	0	0	0	0	0	0	0	0	0	0	0	0	0	0	0	0	0	0	0	0	0	0	7	p__Sarcomastigophora	g__Parvamoeba	s__Parvamoeba_rugata
ASV9703	0	0	0	0	0	0	0	0	0	0	0	0	0	0	0	0	0	0	0	0	0	0	0	0	0	0	0	0	0	0	0	0	0	0	0	0	0	0	7	p__Ciliophora	g__Tetrahymena	s__Tetrahymena_empidokyrea
ASV9702	0	0	0	0	0	0	0	0	0	0	0	0	0	0	0	0	0	0	0	0	0	0	0	0	0	0	0	0	0	0	0	0	0	0	0	0	0	0	7	p__Sarcomastigophora	g__Balamuthia	s__Balamuthia_mandrillaris
ASV9698	0	0	0	0	0	0	0	0	0	0	0	0	0	0	0	0	0	0	0	0	0	0	0	0	0	0	0	0	0	0	0	0	0	0	0	0	0	0	7	p__Chlorophyta	g__Chlorogonium	s__Chlorogonium_capillatum
ASV9693	0	0	0	0	0	0	0	0	0	0	0	0	0	0	0	0	0	0	0	0	0	0	0	0	0	0	0	0	0	0	0	0	0	0	0	0	0	0	7	p__Sarcomastigophora	g__Paramoeba	s__Paramoeba_atlantica
ASV9687	0	0	0	0	0	0	0	0	0	0	0	0	0	0	0	0	0	0	0	0	0	0	0	0	0	0	0	0	0	0	0	0	0	0	0	0	0	0	7	p__Sarcomastigophora	g__Schoutedamoeba	s__Schoutedamoeba_minuta
ASV9677	0	0	0	0	0	0	0	0	0	0	0	0	0	0	0	0	0	0	0	0	0	0	0	0	0	0	0	0	0	0	0	0	0	0	0	0	0	0	7	p__Chrysophyta	g__Synura	s__Synura_sphagnicola
ASV9666	0	0	0	0	0	0	0	0	0	0	0	0	0	0	0	0	0	0	0	0	0	0	0	0	0	0	0	0	0	0	0	0	0	0	0	0	0	7	0	p__Ciliophora	g__Sorogena	s__Sorogena_stoianovitchae
ASV9662	0	0	0	0	0	0	0	0	0	0	0	0	0	0	0	0	0	0	0	0	0	0	0	0	0	0	0	0	0	0	0	0	0	0	0	0	0	7	0	p__Chlorophyta	g__Spongiochloris	s__Spongiochloris_spongiosa
ASV9661	0	0	0	0	0	0	0	0	0	0	0	0	0	0	0	0	0	0	0	0	0	0	0	0	0	0	0	0	0	0	0	0	0	0	0	0	0	7	0	p__Euglenophyta	g__Lepocinclis	s__Lepocinclis_buetschlii
ASV966	0	0	0	0	0	0	0	26	0	0	0	0	537	0	0	0	0	0	0	0	0	0	0	0	0	0	0	0	0	0	0	0	0	0	0	0	0	0	0	p__Chrysophyta	g__Poteriospumella	s__Poteriospumella_lacustris
ASV9659	0	0	0	0	0	0	0	0	0	0	0	0	0	0	0	0	0	0	0	0	0	0	0	0	0	0	0	0	0	0	0	0	0	0	0	0	0	7	0	p__Sarcomastigophora	g__Salpingoeca	s__Salpingoeca_macrocollata
ASV9646	0	0	0	0	0	0	0	0	0	0	0	0	0	0	0	0	0	0	0	0	0	0	0	0	0	0	0	0	0	0	0	0	0	0	0	0	0	7	0	p__Sarcomastigophora	g__Cryptodifflugia	s__Cryptodifflugia_oviformis
ASV9637	0	0	0	0	0	0	0	0	0	0	0	0	0	0	0	0	0	0	0	0	0	0	0	0	0	0	0	0	0	0	0	0	0	0	0	0	7	0	0	p__Euglenophyta	g__Euglenaria	s__Euglenaria_clavata
ASV9635	0	0	0	0	0	0	0	0	0	0	0	0	0	0	0	0	0	0	0	0	0	0	0	0	0	0	0	0	0	0	0	0	0	0	0	0	7	0	0	p__Bacillariophyta	g__Sellaphora	s__Sellaphora_seminulum
ASV9620	0	0	0	0	0	0	0	0	0	0	0	0	0	0	0	0	0	0	0	0	0	0	0	0	0	0	0	0	0	0	0	0	0	0	0	0	7	0	0	p__Chlorophyta	g__Haematococcus	s__Haematococcus_lacustris
ASV962	0	0	0	0	0	0	0	22	0	0	0	0	0	0	0	0	0	0	0	0	0	190	0	0	0	0	29	95	0	0	0	0	0	89	0	0	0	87	55	p__Ciliophora	g__Euplotes	s__Euplotes_parkei
ASV9616	0	0	0	0	0	0	0	0	0	0	0	0	0	0	0	0	0	0	0	0	0	0	0	0	0	0	0	0	0	0	0	0	0	0	0	0	7	0	0	p__Rhodophyta	g__Amansia	s__Amansia_glomerata
ASV9615	0	0	0	0	0	0	0	0	0	0	0	0	0	0	0	0	0	0	0	0	0	0	0	0	0	0	0	0	0	0	0	0	0	0	0	0	7	0	0	p__Ciliophora	g__Cyclidium	s__Cyclidium_porcatum
ASV9611	0	0	0	0	0	0	0	0	0	0	0	0	0	0	0	0	0	0	0	0	0	0	0	0	0	0	0	0	0	0	0	0	0	0	0	0	7	0	0	p__Euglenophyta	g__Strombomonas	s__Strombomonas_borystheniensis
ASV9609	0	0	0	0	0	0	0	0	0	0	0	0	0	0	0	0	0	0	0	0	0	0	0	0	0	0	0	0	0	0	0	0	0	0	0	0	7	0	0	p__Phaeophyta	g__Zonaria	s__Zonaria_diesingiana
ASV9607	0	0	0	0	0	0	0	0	0	0	0	0	0	0	0	0	0	0	0	0	0	0	0	2	0	0	0	0	0	0	0	0	0	0	0	0	5	0	0	p__Sarcomastigophora	g__Lamproderma	s__Lamproderma_sauteri
ASV9603	0	0	0	0	0	0	0	0	0	0	0	0	0	0	0	0	0	0	0	0	0	0	0	0	0	0	0	0	0	0	0	0	0	0	0	0	7	0	0	p__Euglenophyta	g__Gyropaigne	s__Gyropaigne_lefevrei
ASV9600	0	0	0	0	0	0	0	0	0	0	0	0	0	0	0	0	0	0	0	0	0	0	0	0	0	0	0	0	0	0	0	0	0	0	0	0	7	0	0	p__Apicomplexa	g__Haemogregarina	s__Haemogregarina_balli
ASV9595	0	0	0	0	0	0	0	0	0	0	0	0	0	0	0	0	0	0	0	0	0	0	0	0	0	0	0	0	0	0	0	0	0	0	0	0	7	0	0	p__Sarcomastigophora	g__Didymium	s__Didymium_iridis
ASV9594	0	0	0	0	0	0	0	0	0	0	0	0	0	0	0	0	0	0	0	0	0	0	0	0	0	0	0	0	0	0	0	0	0	0	0	0	7	0	0	p__Sarcomastigophora	g__Schizoplasmodium	s__Schizoplasmodium_cavostelioides
ASV9590	0	0	0	0	0	0	0	0	0	0	0	0	0	0	0	0	0	0	0	0	0	0	0	0	0	0	0	0	0	0	0	0	0	0	0	7	0	0	0	p__Ciliophora	g__Amphileptus	s__Amphileptus_bellus
ASV959	0	0	0	0	0	0	0	0	0	0	0	0	0	0	0	0	0	0	0	0	0	11	19	93	24	36	68	92	22	30	119	19	0	0	24	0	0	12	0	p__Chlorophyta	g__Actinochloris	s__Actinochloris_sphaerica
ASV9589	0	0	0	0	0	0	0	0	0	0	0	0	0	0	0	0	0	0	0	0	0	0	0	0	0	0	0	0	0	0	0	0	0	0	7	0	0	0	0	p__Chrysophyta	g__Synura	s__Synura_uvella
ASV9586	0	0	0	0	0	0	0	0	0	0	0	0	0	0	0	0	0	0	0	0	0	0	0	0	0	0	0	0	0	0	0	0	0	0	7	0	0	0	0	p__Ciliophora	g__Meseres	s__Meseres_corlissi
ASV9577	0	0	0	0	0	0	0	0	0	0	0	0	0	0	0	0	0	0	0	0	0	0	0	0	0	0	0	0	0	0	0	0	0	7	0	0	0	0	0	p__Ciliophora	g__Gonostomum	s__Gonostomum_strenuum
ASV9576	0	0	0	0	0	0	0	0	0	0	0	0	0	0	0	0	0	0	0	0	0	0	0	0	0	0	0	0	0	0	0	0	0	7	0	0	0	0	0	p__Chlorophyta	g__Chaetophora	s__Chaetophora_draparnaldioides
ASV9568	0	0	0	0	0	0	0	0	0	0	0	0	0	0	0	0	0	0	0	0	0	0	0	0	0	0	0	0	0	0	0	0	0	7	0	0	0	0	0	p__Euglenophyta	g__Phacus	s__Phacus_applanatus
ASV9567	0	0	0	0	0	0	0	0	0	0	0	0	0	0	0	0	0	0	0	0	0	0	0	0	0	0	0	0	0	0	0	7	0	0	0	0	0	0	0	p__Sarcomastigophora	g__Neobodo	s__Neobodo_designis
ASV9562	0	0	0	0	0	0	0	0	0	0	0	0	0	0	0	0	0	0	0	0	0	0	0	0	0	0	0	0	0	0	0	7	0	0	0	0	0	0	0	p__Chlorophyta	g__Carteria	s__Carteria_radiosa
ASV9561	0	0	0	0	0	0	0	0	0	0	0	0	0	0	0	0	0	0	0	0	0	0	0	0	0	0	0	0	0	0	0	7	0	0	0	0	0	0	0	p__Apicomplexa	g__Leidyana	s__Leidyana_migrator
ASV9560	0	0	0	0	0	0	0	0	0	0	0	0	0	0	0	0	0	0	0	0	0	0	0	0	0	0	0	0	0	0	0	7	0	0	0	0	0	0	0	p__Sarcomastigophora	g__Amoeba	s__Amoeba_proteus
ASV9555	0	0	0	0	0	0	0	0	0	0	0	0	0	0	0	0	0	0	0	0	0	0	0	0	0	0	0	0	0	0	7	0	0	0	0	0	0	0	0	p__Ciliophora	g__Enchelys	s__Enchelys_gasterosteus
ASV9553	0	0	0	0	0	0	0	0	0	0	0	0	0	0	0	0	0	0	0	0	0	0	0	0	0	0	0	0	0	0	7	0	0	0	0	0	0	0	0	p__Ciliophora	g__Dexiotricha	s__Dexiotricha_granulosa
ASV9551	0	0	0	0	0	0	0	0	0	0	0	0	0	0	0	0	0	0	0	0	4	0	0	0	0	0	0	0	0	0	3	0	0	0	0	0	0	0	0	p__Euglenophyta	g__Strombomonas	s__Strombomonas_verrucosa
ASV9547	0	0	0	0	0	0	0	0	0	0	0	0	0	0	0	0	0	0	0	0	0	0	0	0	0	0	0	0	0	0	7	0	0	0	0	0	0	0	0	p__Euglenophyta	g__Euglena	s__Euglena_tristella
ASV9545	0	0	0	0	0	0	0	0	0	0	0	0	0	0	0	0	0	0	0	0	0	0	0	0	0	0	0	0	0	0	7	0	0	0	0	0	0	0	0	p__Sarcomastigophora	g__Nuclearia	s__Nuclearia_thermophila
ASV9543	0	0	0	0	0	0	0	0	0	0	0	0	0	0	0	0	0	0	0	0	0	0	0	0	0	0	0	0	0	0	7	0	0	0	0	0	0	0	0	p__Euglenophyta	g__Lepocinclis	s__Lepocinclis_playfairiana
ASV954	0	0	0	0	0	0	0	0	59	199	0	0	0	0	82	0	0	0	0	0	35	0	6	0	6	27	4	9	0	0	20	0	8	17	11	0	54	15	19	p__Bacillariophyta	g__Cymbella	s__Cymbella_excisa
ASV9530	0	0	0	0	0	0	0	0	0	0	0	0	0	0	0	0	0	0	0	0	0	0	0	0	0	0	0	0	0	7	0	0	0	0	0	0	0	0	0	p__Chlorophyta	g__Chlorosarcinopsis	s__Chlorosarcinopsis_aggregata
ASV9526	0	0	0	0	0	0	0	0	0	0	0	0	0	0	0	0	0	0	0	0	0	0	0	0	0	0	0	0	7	0	0	0	0	0	0	0	0	0	0	p__Euglenophyta	g__Euglena	s__Euglena_deses
ASV9525	0	0	0	0	0	0	0	0	0	0	0	0	0	0	0	0	0	0	0	0	0	0	0	0	0	0	0	0	7	0	0	0	0	0	0	0	0	0	0	p__Euglenophyta	g__Phacus	s__Phacus_orbicularis
ASV9518	0	0	0	0	0	0	0	0	0	0	0	0	0	0	0	0	0	0	0	0	0	0	0	0	0	0	0	7	0	0	0	0	0	0	0	0	0	0	0	p__Chlorophyta	g__Didymogenes	s__Didymogenes_sphaerica
ASV9515	0	0	0	0	0	0	0	0	0	0	0	0	0	0	0	0	0	0	0	0	4	0	0	0	0	0	0	3	0	0	0	0	0	0	0	0	0	0	0	p__Xanthophyta	g__Chattonella	s__Chattonella_subsalsa
ASV9513	0	0	0	0	0	0	0	0	0	0	0	0	0	0	0	0	0	0	0	0	0	0	0	0	0	0	0	7	0	0	0	0	0	0	0	0	0	0	0	p__Chlorophyta	g__Deasonia	s__Deasonia_multinucleata
ASV9508	0	0	0	0	0	0	0	0	0	0	0	0	0	0	0	0	0	0	0	0	0	0	0	0	0	0	0	7	0	0	0	0	0	0	0	0	0	0	0	p__Myxozoa	g__Parvilucifera	s__Parvilucifera_prorocentri
ASV9507	0	0	0	0	0	0	0	0	0	0	0	0	0	0	0	0	0	0	0	0	0	0	0	0	0	0	0	7	0	0	0	0	0	0	0	0	0	0	0	p__Sarcomastigophora	g__Entamoeba	s__Entamoeba_equi
ASV9499	0	0	0	0	0	0	7	0	0	0	0	0	0	0	0	0	0	0	0	0	0	0	0	0	0	0	0	0	0	0	0	0	0	0	0	0	0	0	0	p__Bacillariophyta	g__Cyclotella	s__Cyclotella_meneghiniana
ASV9497	0	0	0	0	0	0	7	0	0	0	0	0	0	0	0	0	0	0	0	0	0	0	0	0	0	0	0	0	0	0	0	0	0	0	0	0	0	0	0	p__Bacillariophyta	g__Cylindrotheca	s__Cylindrotheca_closterium
ASV9491	0	0	0	0	0	0	7	0	0	0	0	0	0	0	0	0	0	0	0	0	0	0	0	0	0	0	0	0	0	0	0	0	0	0	0	0	0	0	0	p__Bacillariophyta	g__Cyclotella	s__Cyclotella_meneghiniana
ASV9489	0	0	0	0	0	0	7	0	0	0	0	0	0	0	0	0	0	0	0	0	0	0	0	0	0	0	0	0	0	0	0	0	0	0	0	0	0	0	0	p__Sarcomastigophora	g__Angulamoeba	s__Angulamoeba_microcystivorans
ASV9481	0	0	0	0	0	0	7	0	0	0	0	0	0	0	0	0	0	0	0	0	0	0	0	0	0	0	0	0	0	0	0	0	0	0	0	0	0	0	0	p__Chlorophyta	g__Dolichomastix	s__Dolichomastix_tenuilepis
ASV9473	0	0	0	0	0	0	7	0	0	0	0	0	0	0	0	0	0	0	0	0	0	0	0	0	0	0	0	0	0	0	0	0	0	0	0	0	0	0	0	p__Sarcomastigophora	g__Neobodo	s__Neobodo_designis
ASV947	0	0	0	0	0	0	0	0	0	0	0	0	0	0	0	0	0	0	0	0	119	0	84	67	92	107	67	19	0	0	26	0	0	0	0	0	0	0	0	p__Ciliophora	g__Levicoleps	s__Levicoleps_biwae
ASV9467	0	7	0	0	0	0	0	0	0	0	0	0	0	0	0	0	0	0	0	0	0	0	0	0	0	0	0	0	0	0	0	0	0	0	0	0	0	0	0	p__Ciliophora	g__Vaginicola	s__Vaginicola_crystallina
ASV9464	0	0	0	0	0	0	0	0	0	0	0	0	0	0	0	0	0	0	7	0	0	0	0	0	0	0	0	0	0	0	0	0	0	0	0	0	0	0	0	p__Bacillariophyta	g__Gomphonema	s__Gomphonema_parvulum
ASV946	0	0	0	0	0	0	0	0	0	0	0	0	0	0	0	0	0	0	0	0	0	0	36	0	0	0	0	33	0	16	32	72	40	47	0	89	0	0	216	p__Ciliophora	g__Tintinnidium	s__Tintinnidium_primitivum
ASV9441	0	0	0	0	0	0	0	0	0	7	0	0	0	0	0	0	0	0	0	0	0	0	0	0	0	0	0	0	0	0	0	0	0	0	0	0	0	0	0	p__Sarcomastigophora	g__Protosteliopsis	s__Protosteliopsis_fimicola
ASV9437	0	0	0	0	0	0	0	0	0	7	0	0	0	0	0	0	0	0	0	0	0	0	0	0	0	0	0	0	0	0	0	0	0	0	0	0	0	0	0	p__Glaucophyta	g__Cyanophora	s__Cyanophora_paradoxa
ASV9432	0	0	0	0	0	0	0	0	0	4	0	0	0	0	0	0	0	0	0	0	0	0	0	0	0	0	0	0	0	0	0	0	0	0	0	0	3	0	0	p__Euglenophyta	g__Euglena	s__Euglena_tristella
ASV9430	0	0	0	0	0	0	0	0	0	7	0	0	0	0	0	0	0	0	0	0	0	0	0	0	0	0	0	0	0	0	0	0	0	0	0	0	0	0	0	p__Haptophyta	g__Pavlova	s__Pavlova_gyrans
ASV9429	0	0	0	0	0	0	0	0	0	7	0	0	0	0	0	0	0	0	0	0	0	0	0	0	0	0	0	0	0	0	0	0	0	0	0	0	0	0	0	p__Apicomplexa	g__Gregarina	s__Gregarina_chortiocetes
ASV9422	0	0	0	0	0	0	0	0	0	0	0	0	0	0	0	0	0	0	0	0	0	0	0	0	0	8	0	0	0	0	0	0	0	0	0	0	0	0	0	p__Chlorophyta	g__Tetracystis	s__Tetracystis_sarcinalis
ASV9421	0	0	0	0	0	0	0	0	0	0	0	0	0	0	0	0	0	0	0	0	0	0	0	0	0	8	0	0	0	0	0	0	0	0	0	0	0	0	0	p__Chlorophyta	g__Chlorochytrium	s__Chlorochytrium_lemnae
ASV9416	0	0	0	0	0	0	0	0	0	0	0	0	0	0	0	0	0	0	0	0	0	0	0	0	8	0	0	0	0	0	0	0	0	0	0	0	0	0	0	p__Chlorophyta	g__Spongiococcum	s__Spongiococcum_tetrasporum
ASV9415	0	0	0	0	0	0	0	0	0	0	0	0	0	0	0	0	0	0	0	0	0	0	0	0	8	0	0	0	0	0	0	0	0	0	0	0	0	0	0	p__Haptophyta	g__Diacronema	s__Diacronema_vlkianum
ASV9414	0	0	0	0	0	0	0	0	0	0	0	0	0	0	0	0	0	0	0	0	0	0	0	0	8	0	0	0	0	0	0	0	0	0	0	0	0	0	0	p__Ciliophora	g__Pleuronema	s__Pleuronema_setigerum
ASV9403	0	0	0	0	0	0	0	0	0	0	0	0	0	0	0	0	0	0	0	0	0	0	8	0	0	0	0	0	0	0	0	0	0	0	0	0	0	0	0	p__Chlorophyta	g__Pandorina	s__Pandorina_morum
ASV9400	0	0	0	0	0	0	0	0	0	0	0	0	0	0	0	0	0	0	0	0	0	0	8	0	0	0	0	0	0	0	0	0	0	0	0	0	0	0	0	p__Apicomplexa	g__Gregarina	s__Gregarina_caledia
ASV9398	0	0	0	0	0	0	0	0	0	0	0	0	0	0	0	0	0	0	0	0	0	8	0	0	0	0	0	0	0	0	0	0	0	0	0	0	0	0	0	p__Chlorophyta	g__Golenkinia	s__Golenkinia_brevispicula
ASV9393	0	0	0	0	0	0	0	0	0	0	0	0	0	0	0	0	0	0	0	0	0	8	0	0	0	0	0	0	0	0	0	0	0	0	0	0	0	0	0	p__Chrysophyta	g__Ochromonas	s__Ochromonas_danica
ASV9390	0	0	0	0	0	0	0	0	0	0	0	0	0	0	0	0	0	0	0	0	0	8	0	0	0	0	0	0	0	0	0	0	0	0	0	0	0	0	0	p__Sarcomastigophora	g__Entamoeba	s__Entamoeba_equi
ASV9389	0	0	0	0	0	0	0	0	0	0	0	0	0	0	0	0	0	0	0	0	0	8	0	0	0	0	0	0	0	0	0	0	0	0	0	0	0	0	0	p__Cryptophyta	g__Goniomonas	s__Cryptomonas_lundii
ASV9388	0	0	0	0	0	0	0	0	0	0	0	0	0	0	0	0	0	0	0	0	0	8	0	0	0	0	0	0	0	0	0	0	0	0	0	0	0	0	0	p__Chlorophyta	g__Neochloris	s__Neochloris_vigensis
ASV9386	0	0	0	0	0	0	0	0	0	0	0	0	0	0	0	0	0	0	0	0	0	8	0	0	0	0	0	0	0	0	0	0	0	0	0	0	0	0	0	p__Ciliophora	g__Oxytricha	s__Oxytricha_granulifera
ASV9380	0	0	0	0	0	0	0	0	0	0	0	0	0	0	0	0	0	0	0	0	0	8	0	0	0	0	0	0	0	0	0	0	0	0	0	0	0	0	0	p__Dinophyta	g__Woloszynskia	s__Woloszynskia_pascheri
ASV9365	0	0	0	0	0	0	0	0	0	0	0	0	0	0	0	0	0	0	0	0	5	0	0	0	0	0	3	0	0	0	0	0	0	0	0	0	0	0	0	p__Cryptophyta	g__Guillardia	s__Guillardia_theta
ASV9357	0	0	0	0	0	0	0	0	0	0	0	0	0	0	0	0	0	0	0	0	8	0	0	0	0	0	0	0	0	0	0	0	0	0	0	0	0	0	0	p__Chlorophyta	g__Heterochlamydomonas	s__Heterochlamydomonas_inaequalis
ASV9353	0	0	0	0	0	0	0	0	0	0	0	0	0	0	0	0	0	0	0	0	8	0	0	0	0	0	0	0	0	0	0	0	0	0	0	0	0	0	0	p__Sarcomastigophora	g__Neobodo	s__Neobodo_designis
ASV9352	0	0	0	0	0	0	0	0	0	0	0	0	0	0	0	0	0	0	0	0	8	0	0	0	0	0	0	0	0	0	0	0	0	0	0	0	0	0	0	p__Euglenophyta	g__Euglenaria	s__Euglenaria_anabaena
ASV935	0	0	0	0	0	0	0	0	0	0	0	0	0	0	18	0	0	0	0	0	93	12	32	40	63	33	60	12	0	17	21	47	0	0	0	35	45	14	49	p__Sarcomastigophora	g__Neobodo	s__Neobodo_designis
ASV9346	0	0	0	0	0	0	0	0	0	0	0	0	0	0	0	0	0	0	0	0	0	0	0	0	0	0	0	0	0	0	0	0	0	0	0	0	0	0	8	p__Euglenophyta	g__Lepocinclis	s__Lepocinclis_salina
ASV9344	0	0	0	0	0	0	0	0	0	0	0	0	0	0	0	0	0	0	0	0	0	0	0	0	0	0	0	0	0	0	0	0	0	0	0	0	0	0	8	p__Cryptophyta	g__Falcomonas	s__Falcomonas_daucoides
ASV9341	0	0	0	0	0	0	0	0	0	0	0	0	0	0	0	0	0	0	0	0	0	0	0	2	3	0	0	0	0	0	0	0	0	0	0	0	0	0	3	p__Sarcomastigophora	g__Nematostelium	s__Nematostelium_ovatum
ASV9334	0	0	0	0	0	0	0	0	0	0	0	0	0	0	0	0	0	0	0	0	0	0	0	0	0	0	0	0	0	0	0	0	0	0	0	0	0	0	8	p__Sarcomastigophora	g__Zelonia	s__Zelonia_costaricensis
ASV9333	0	0	0	0	0	0	0	0	0	0	0	0	0	0	0	0	0	0	0	0	0	0	0	0	0	0	0	0	0	0	0	0	0	0	0	0	0	0	8	p__Chlorophyta	g__Chlamydomonas	s__Chlamydomonas_reinhardtii
ASV9316	0	0	0	0	0	0	0	0	0	0	0	0	0	0	0	0	0	0	0	0	0	0	0	0	0	0	0	0	0	0	0	0	0	0	0	0	0	0	8	p__Sarcomastigophora	g__Korotnevella	s__Korotnevella_stella
ASV9314	0	0	0	0	0	0	0	0	0	0	0	0	0	0	0	0	0	0	0	0	0	0	0	0	0	0	0	0	0	0	0	0	0	0	0	0	0	0	8	p__Ciliophora	g__Frontonia	s__Frontonia_pusilla
ASV9311	0	0	0	0	0	0	0	0	0	0	0	0	0	0	0	0	0	0	0	0	0	0	0	0	0	0	0	0	0	0	0	0	0	0	0	0	0	0	8	p__Chlorophyta	g__Bracteacoccus	s__Bracteacoccus_glacialis
ASV9309	0	0	0	0	0	0	0	0	0	0	0	0	0	0	0	0	0	0	0	0	0	0	0	0	0	0	0	0	0	0	0	0	0	0	0	0	0	0	8	p__Apicomplexa	g__Gregarina	s__Gregarina_cloptoni
ASV9307	0	0	0	0	0	0	0	0	0	0	0	0	0	0	0	0	0	0	0	0	0	0	0	0	0	0	0	0	0	0	0	0	0	0	0	0	0	0	8	p__Rhodophyta	g__Wildemania	s__Wildemania_amplissima
ASV9304	0	0	0	0	0	0	0	0	0	0	0	0	0	0	0	0	0	0	0	0	0	0	0	0	0	0	0	0	0	0	0	0	0	0	0	0	0	8	0	p__Apicomplexa	g__Leidyana	s__Leidyana_migrator
ASV9303	0	0	0	0	0	0	0	0	0	0	0	0	0	0	0	0	0	0	0	0	0	0	0	0	0	0	0	0	0	0	0	0	0	0	0	0	0	8	0	p__Chlorophyta	g__Oedogonium	s__Oedogonium_angustistomum
ASV9302	0	0	0	0	0	0	0	0	0	0	0	0	0	0	0	0	0	0	0	0	0	0	0	0	0	0	0	0	0	0	0	0	0	0	0	0	0	8	0	p__Euglenophyta	g__Lepocinclis	s__Lepocinclis_buetschlii
ASV930	0	0	0	0	0	0	0	0	0	539	0	0	0	0	0	0	0	0	0	0	0	0	0	0	0	26	5	0	0	0	24	0	0	0	0	0	0	0	0	p__Ciliophora	g__Pseudogastrostyla	s__Pseudogastrostyla_flava
ASV9281	0	0	0	0	0	0	0	0	0	0	0	0	0	0	0	0	0	0	0	0	0	0	0	0	0	0	0	0	0	0	0	0	0	0	0	0	8	0	0	p__Ciliophora	g__Exocolpoda	s__Exocolpoda_augustini
ASV928	209	0	0	0	0	0	189	17	0	0	0	0	0	0	0	0	0	0	0	0	6	0	0	0	0	10	22	12	0	0	8	0	0	113	5	4	0	0	0	p__Dinophyta	g__Ceratium	s__Ceratium_furcoides
ASV9279	0	0	0	0	0	0	0	0	0	0	0	0	0	0	0	0	0	0	0	0	0	0	0	0	0	0	0	0	0	0	0	0	0	0	0	0	8	0	0	p__Sarcomastigophora	g__Angulamoeba	s__Angulamoeba_microcystivorans
ASV9278	0	0	0	0	0	0	0	0	0	0	0	0	0	0	0	0	0	0	0	0	0	0	0	0	0	0	0	0	0	0	0	0	0	0	0	0	8	0	0	p__Sarcomastigophora	g__Telaepolella	s__Telaepolella_tubasferens
ASV9252	0	0	0	0	0	0	0	0	0	0	0	0	0	0	0	0	0	0	0	0	0	0	0	0	0	0	0	0	0	0	0	0	0	0	0	0	8	0	0	p__Sarcomastigophora	g__Angulamoeba	s__Angulamoeba_microcystivorans
ASV9243	0	0	0	0	0	0	0	0	0	0	0	0	0	0	0	0	0	0	0	0	0	0	0	0	0	0	0	0	0	0	0	0	0	0	0	0	8	0	0	p__Euglenophyta	g__Euglenaria	s__Euglenaria_anabaena
ASV9242	0	0	0	0	0	0	0	0	0	0	0	0	0	0	0	0	0	0	0	0	0	0	0	0	0	0	0	0	0	0	0	0	0	0	0	0	8	0	0	p__Cryptophyta	g__Plagioselmis	s__Plagioselmis_nannoplanctica
ASV9239	0	0	0	0	0	0	0	0	0	0	0	0	0	0	0	0	0	0	0	0	0	0	0	0	0	0	0	0	0	0	0	0	0	0	0	0	8	0	0	p__Euglenophyta	g__Euglena	s__Euglena_longa
ASV9237	0	0	0	0	0	0	0	0	0	0	0	0	0	0	0	0	0	0	0	0	0	0	0	0	0	0	0	0	0	0	0	0	0	0	0	0	8	0	0	p__Sarcomastigophora	g__Saccamoeba	s__Saccamoeba_limax
ASV9236	0	0	0	0	0	0	0	0	0	0	0	0	0	0	0	0	0	0	0	0	0	0	0	0	0	0	0	0	0	0	0	0	0	0	0	0	8	0	0	p__Cryptophyta	g__Goniomonas	s__Goniomonas_pacifica
ASV9234	0	0	0	0	0	0	0	0	0	0	0	0	0	0	0	0	0	0	0	0	0	0	0	0	0	0	0	0	0	0	0	0	0	0	0	0	8	0	0	p__Chlorophyta	g__Desmochloris	s__Desmochloris_halophila
ASV9227	0	0	0	0	0	0	0	0	0	0	0	0	0	0	0	0	0	0	0	0	0	0	0	0	0	0	0	0	0	0	0	0	0	0	0	8	0	0	0	p__Ciliophora	g__Stylonychia	s__Stylonychia_lemnae
ASV9225	0	0	0	0	0	0	0	0	0	0	0	0	0	0	0	0	0	0	0	0	0	0	0	0	0	0	0	0	0	0	0	0	0	0	0	8	0	0	0	p__Euglenophyta	g__Trachelomonas	s__Trachelomonas_lefevrei
ASV9222	0	0	0	0	0	0	0	0	0	0	0	0	0	0	0	0	0	0	0	0	0	0	0	0	0	0	0	0	0	0	0	0	0	0	8	0	0	0	0	p__Euglenophyta	g__Euglenaria	s__Euglenaria_anabaena
ASV922	267	0	0	0	89	0	49	0	0	197	0	0	0	0	0	0	0	0	0	0	0	0	0	0	0	0	0	0	0	0	0	0	0	0	0	0	0	0	0	p__Xanthophyta	g__Fibrocapsa	s__Fibrocapsa_japonica
ASV9219	0	0	0	0	0	0	0	0	0	0	0	0	0	0	0	0	0	0	0	0	0	0	0	0	0	0	0	0	0	0	0	0	0	0	8	0	0	0	0	p__Apicomplexa	g__Gregarina	s__Gregarina_caledia
ASV9206	0	0	0	0	0	0	0	0	0	0	0	0	0	0	0	0	0	0	0	0	0	0	0	0	0	0	0	0	0	0	0	8	0	0	0	0	0	0	0	p__Dinophyta	g__Blastodinium	s__Blastodinium_contortum
ASV9205	0	0	0	0	0	0	0	0	0	0	0	0	0	0	0	0	0	0	0	0	0	0	0	0	0	0	3	0	0	0	0	5	0	0	0	0	0	0	0	p__Ciliophora	g__Sandmanniella	s__Sandmanniella_terricola
ASV9200	0	0	0	0	0	0	0	0	0	0	0	0	0	0	0	0	0	0	0	0	0	0	0	0	0	0	0	0	0	0	0	8	0	0	0	0	0	0	0	p__Apicomplexa	g__Leidyana	s__Leidyana_migrator
ASV920	0	0	0	0	223	93	0	0	0	37	0	0	0	0	0	0	0	0	46	0	0	0	16	19	0	11	10	14	0	19	18	27	0	0	30	0	19	21	0	p__Chlorophyta	g__Chlorochytrium	s__Chlorochytrium_lemnae
ASV9196	0	0	0	0	0	0	0	0	0	0	0	0	0	0	0	0	0	0	0	0	0	0	0	0	0	0	0	0	0	0	8	0	0	0	0	0	0	0	0	p__Euglenophyta	g__Lepocinclis	s__Lepocinclis_oxyuris
ASV9195	0	0	0	0	0	0	0	0	0	0	0	0	0	0	0	0	0	0	0	0	0	0	0	0	0	0	0	0	0	0	8	0	0	0	0	0	0	0	0	p__Euglenophyta	g__Phacus	s__Phacus_ranula
ASV9194	0	0	0	0	0	0	0	0	0	0	0	0	0	0	0	0	0	0	0	0	0	0	0	0	0	0	0	0	0	0	8	0	0	0	0	0	0	0	0	p__Chlorophyta	g__Quadricoccus	s__Quadricoccus_ellipticus
ASV9192	0	0	0	0	0	0	0	0	0	0	0	0	0	0	0	0	0	0	0	0	0	0	0	0	0	0	0	0	0	0	8	0	0	0	0	0	0	0	0	p__Chlorophyta	g__Catena	s__Catena_viridis
ASV9191	0	0	0	0	0	0	0	0	0	0	0	0	0	0	0	0	0	0	0	0	0	0	0	0	0	0	0	0	0	0	8	0	0	0	0	0	0	0	0	p__Chlorophyta	g__Prototheca	s__Prototheca_stagnorum
ASV9190	0	0	0	0	0	0	0	0	0	0	0	0	0	0	0	0	0	0	0	0	0	0	0	0	0	0	0	0	0	0	4	0	0	0	0	0	4	0	0	p__Rhodophyta	g__Bangia	s__Bangia_fuscopurpurea
ASV9187	0	0	0	0	0	0	0	0	0	0	0	0	0	0	0	0	0	0	0	0	0	0	4	0	0	0	0	0	0	0	4	0	0	0	0	0	0	0	0	p__Apicomplexa	g__Aranciocystis	s__Aranciocystis_muskarensis
ASV9185	0	0	0	0	0	0	0	0	0	0	0	0	0	0	0	0	0	0	0	0	0	0	0	0	0	0	0	0	0	0	8	0	0	0	0	0	0	0	0	p__Apicomplexa	g__Leidyana	s__Leidyana_migrator
ASV9183	0	0	0	0	0	0	0	0	0	0	0	0	0	0	0	0	0	0	0	0	0	0	0	0	0	0	0	0	0	0	8	0	0	0	0	0	0	0	0	p__Ciliophora	g__Leprotintinnus	s__Leprotintinnus_nordqvisti
ASV9181	0	0	0	0	0	0	0	0	0	0	0	0	0	0	0	0	0	0	0	0	0	0	0	0	0	0	0	0	0	4	0	0	0	0	0	0	0	0	4	p__Sarcomastigophora	g__Diplonema	s__Diplonema_ambulator
ASV9179	0	0	0	0	0	0	0	0	0	0	0	0	0	0	0	0	0	0	0	0	0	0	0	0	0	0	0	0	0	8	0	0	0	0	0	0	0	0	0	p__Chlorophyta	g__Chlamydomonas	s__Chlamydomonas_moewusii
ASV9176	0	0	0	0	0	0	0	0	0	0	0	0	0	0	0	0	0	0	0	0	0	0	0	0	0	0	0	0	0	8	0	0	0	0	0	0	0	0	0	p__Ciliophora	g__Chilodonella	s__Chilodonella_acuta
ASV9172	0	0	0	0	0	0	0	0	0	0	0	0	0	0	0	0	0	0	0	0	0	0	0	0	0	0	0	8	0	0	0	0	0	0	0	0	0	0	0	p__Dinophyta	g__Woloszynskia	s__Woloszynskia_leopoliensis
ASV9168	0	0	0	0	0	0	0	0	0	0	0	0	0	0	0	0	0	0	0	0	0	0	0	0	0	0	0	8	0	0	0	0	0	0	0	0	0	0	0	p__Euglenophyta	g__Euglena	s__Euglena_longa
ASV9162	0	0	0	0	0	0	0	0	0	0	0	0	0	0	0	0	0	0	0	0	0	0	0	0	0	0	0	8	0	0	0	0	0	0	0	0	0	0	0	p__Euglenophyta	g__Phacus	s__Phacus_orbicularis
ASV916	0	0	0	0	0	0	38	0	0	0	0	0	0	0	0	0	0	0	0	0	0	0	0	0	9	0	6	0	48	17	43	226	17	21	0	11	0	0	172	p__Sarcomastigophora	g__Salpingoeca	s__Salpingoeca_urceolata
ASV9154	0	0	0	0	0	0	0	0	0	0	0	0	0	0	0	0	0	0	0	0	0	0	0	3	0	0	0	5	0	0	0	0	0	0	0	0	0	0	0	p__Myxozoa	g__Myxobolus	s__Myxobolus_carnaticus
ASV9143	0	0	0	0	0	0	8	0	0	0	0	0	0	0	0	0	0	0	0	0	0	0	0	0	0	0	0	0	0	0	0	0	0	0	0	0	0	0	0	p__Dinophyta	g__Nusuttodinium	s__Nusuttodinium_acidotum
ASV9141	0	0	0	0	0	0	8	0	0	0	0	0	0	0	0	0	0	0	0	0	0	0	0	0	0	0	0	0	0	0	0	0	0	0	0	0	0	0	0	p__Dinophyta	g__Ceratium	s__Ceratium_furcoides
ASV9135	0	0	0	0	0	0	8	0	0	0	0	0	0	0	0	0	0	0	0	0	0	0	0	0	0	0	0	0	0	0	0	0	0	0	0	0	0	0	0	p__Bacillariophyta	g__Melosira	s__Melosira_varians
ASV9130	0	0	0	0	0	0	8	0	0	0	0	0	0	0	0	0	0	0	0	0	0	0	0	0	0	0	0	0	0	0	0	0	0	0	0	0	0	0	0	p__Ciliophora	g__Lacrymaria	s__Lacrymaria_marina
ASV913	0	0	123	0	0	0	0	0	0	0	0	0	0	183	0	0	0	0	31	0	7	0	0	22	0	32	13	22	0	0	19	19	0	0	38	0	68	16	17	p__Chlorophyta	g__Chlamydomonas	s__Chlamydomonas_moewusii
ASV9126	0	0	0	0	0	0	8	0	0	0	0	0	0	0	0	0	0	0	0	0	0	0	0	0	0	0	0	0	0	0	0	0	0	0	0	0	0	0	0	p__Chrysophyta	g__Dinobryon	s__Dinobryon_sertularia
ASV9119	0	0	0	0	0	0	8	0	0	0	0	0	0	0	0	0	0	0	0	0	0	0	0	0	0	0	0	0	0	0	0	0	0	0	0	0	0	0	0	p__Dinophyta	g__Nusuttodinium	s__Nusuttodinium_amphidinioides
ASV9116	0	0	0	0	0	0	8	0	0	0	0	0	0	0	0	0	0	0	0	0	0	0	0	0	0	0	0	0	0	0	0	0	0	0	0	0	0	0	0	p__Cryptophyta	g__Guillardia	s__Guillardia_theta
ASV9114	0	0	0	0	0	0	8	0	0	0	0	0	0	0	0	0	0	0	0	0	0	0	0	0	0	0	0	0	0	0	0	0	0	0	0	0	0	0	0	p__Sarcomastigophora	g__Meriderma	s__Meriderma_fuscatum
ASV9106	0	0	0	0	0	0	0	0	0	0	0	0	0	0	0	0	0	0	8	0	0	0	0	0	0	0	0	0	0	0	0	0	0	0	0	0	0	0	0	p__Cryptophyta	g__Rhodomonas	s__Rhodomonas_abbreviata
ASV91	0	0	0	0	0	98	59	0	0	0	0	0	0	0	0	0	155	0	0	16	995	0	633	641	379	877	535	78	0	0	0	0	0	77	141	314	2154	649	22	p__Cryptophyta	g__Chroomonas	s__Chroomonas_mesostigmatica
ASV9091	0	0	0	0	0	0	0	0	0	8	0	0	0	0	0	0	0	0	0	0	0	0	0	0	0	0	0	0	0	0	0	0	0	0	0	0	0	0	0	p__Cryptophyta	g__Goniomonas	s__Cryptomonas_pyrenoidifera
ASV9089	0	0	0	0	0	0	0	0	0	8	0	0	0	0	0	0	0	0	0	0	0	0	0	0	0	0	0	0	0	0	0	0	0	0	0	0	0	0	0	p__Sarcomastigophora	g__Crithidia	s__Crithidia_fasciculata
ASV9081	0	0	0	0	0	0	0	0	0	8	0	0	0	0	0	0	0	0	0	0	0	0	0	0	0	0	0	0	0	0	0	0	0	0	0	0	0	0	0	p__Rotifera	g__Encentrum	s__Encentrum_tectipes
ASV9073	0	0	0	0	0	0	0	0	0	8	0	0	0	0	0	0	0	0	0	0	0	0	0	0	0	0	0	0	0	0	0	0	0	0	0	0	0	0	0	p__Chrysophyta	g__Chrysamoeba	s__Chrysamoeba_mikrokonta
ASV9060	0	0	0	0	0	0	0	0	0	0	0	0	0	0	0	0	0	0	0	0	0	0	0	0	0	0	9	0	0	0	0	0	0	0	0	0	0	0	0	p__Myxozoa	g__Zschokkella	s__Zschokkella_nova
ASV9059	0	0	0	0	0	0	0	0	0	0	0	0	0	0	0	0	0	0	0	0	0	0	0	0	0	0	9	0	0	0	0	0	0	0	0	0	0	0	0	p__Chlorophyta	g__Chloroidium	s__Chloroidium_ellipsoideum
ASV9058	0	0	0	0	0	0	0	0	0	0	0	0	0	0	0	0	0	0	0	0	0	0	0	0	0	0	9	0	0	0	0	0	0	0	0	0	0	0	0	p__Ciliophora	g__Levicoleps	s__Levicoleps_biwae
ASV9046	0	0	0	0	0	0	0	0	0	0	0	0	0	0	0	0	0	0	0	0	0	0	0	9	0	0	0	0	0	0	0	0	0	0	0	0	0	0	0	p__Chlorophyta	g__Catena	s__Catena_viridis
ASV9037	0	0	0	0	0	0	0	0	0	0	0	0	0	0	0	0	0	0	0	0	0	0	9	0	0	0	0	0	0	0	0	0	0	0	0	0	0	0	0	p__Ciliophora	g__Oxytricha	s__Oxytricha_ferruginea
ASV9029	0	0	0	0	0	0	0	0	0	0	0	0	0	0	0	0	0	0	0	0	0	9	0	0	0	0	0	0	0	0	0	0	0	0	0	0	0	0	0	p__Ciliophora	g__Protocyclidium	s__Protocyclidium_citrullus
ASV9011	0	0	0	0	0	0	0	0	0	0	0	0	0	0	0	0	0	0	0	0	9	0	0	0	0	0	0	0	0	0	0	0	0	0	0	0	0	0	0	p__Apicomplexa	g__Hepatozoon	s__Hepatozoon_sipedon
ASV9010	0	0	0	0	0	0	0	0	0	0	0	0	0	0	0	0	0	0	0	0	4	0	0	5	0	0	0	0	0	0	0	0	0	0	0	0	0	0	0	p__Haptophyta	g__Pavlova	s__Pavlova_ennorea
ASV8998	0	0	0	0	0	0	0	0	0	0	0	0	0	0	0	0	0	0	0	0	0	0	0	0	0	0	0	0	0	0	0	0	0	0	0	0	0	0	9	p__Chlorophyta	g__Microglena	s__Microglena_monadina
ASV899	0	0	0	0	0	0	8	0	0	0	0	0	0	0	0	0	0	0	0	0	33	0	119	40	161	231	0	0	29	0	0	0	0	0	0	0	0	0	0	p__Ciliophora	g__Hypotrichidium	s__Hypotrichidium_paraconicum
ASV8989	0	0	0	0	0	0	0	0	0	0	0	0	0	0	0	0	0	0	0	0	0	0	0	0	0	0	0	0	0	0	0	0	0	0	0	0	0	0	9	p__Bacillariophyta	g__Gomphonema	s__Gomphonema_micropus
ASV8978	0	0	0	0	0	0	0	0	0	0	0	0	0	0	0	0	0	0	0	0	0	0	0	0	0	0	0	0	0	0	0	0	0	0	0	0	0	0	9	p__Bacillariophyta	g__Cylindrotheca	s__Cylindrotheca_closterium
ASV8967	0	0	0	0	0	0	0	0	0	0	0	0	0	0	0	0	0	0	0	0	0	0	0	0	0	0	0	0	0	0	0	0	0	0	0	0	0	0	9	p__Rhodophyta	g__Sarcodiotheca	s__Sarcodiotheca_gaudichaudii
ASV8962	0	0	0	0	0	0	0	0	0	0	0	0	0	0	0	0	0	0	0	0	0	0	0	0	0	0	0	0	0	0	0	0	0	0	0	0	0	0	9	p__Chlorophyta	g__Dolichomastix	s__Dolichomastix_tenuilepis
ASV896	0	0	0	0	0	0	0	0	0	0	0	0	0	622	0	0	0	0	0	0	0	0	0	0	0	0	0	0	0	0	0	0	0	0	0	0	0	0	0	p__Ciliophora	g__Protogastrostyla	s__Protogastrostyla_pulchra
ASV8957	0	0	0	0	0	0	0	0	0	0	0	0	0	0	0	0	0	0	0	0	0	0	0	0	0	0	0	0	0	0	0	0	0	0	0	0	0	9	0	p__Chlorophyta	g__Chlorogonium	s__Chlorogonium_capillatum
ASV8950	0	0	0	0	0	0	0	0	0	0	0	0	0	0	0	0	0	0	0	0	0	0	0	0	0	0	0	0	0	0	0	0	0	0	0	0	0	9	0	p__Chlorophyta	g__Botryosphaerella	s__Botryosphaerella_sudetica
ASV8949	0	0	0	0	0	0	0	0	0	0	0	0	0	0	0	0	0	0	0	0	0	0	0	0	0	0	0	0	0	0	0	0	0	0	0	0	0	9	0	p__Euglenophyta	g__Phacus	s__Phacus_tortus
ASV8944	0	0	0	0	0	0	0	0	0	0	0	0	0	0	0	0	0	0	0	0	0	0	0	0	0	0	0	0	0	0	0	0	0	0	0	0	0	9	0	p__Apicomplexa	g__Syncystis	s__Syncystis_mirabilis
ASV893	0	0	0	0	0	0	11	0	0	0	0	0	0	0	0	0	0	0	0	0	0	0	0	0	41	84	43	0	0	0	0	0	0	20	150	0	157	60	62	p__Chlorophyta	g__Chlorococcum	s__Chlorococcum_polymorphum
ASV8924	0	0	0	0	0	0	0	0	0	0	0	0	0	0	0	0	0	0	0	0	0	0	0	0	0	0	0	0	0	0	0	0	0	0	0	0	9	0	0	p__Ciliophora	g__Tetrahymena	s__Tetrahymena_paravorax
ASV8920	0	0	0	0	0	0	0	0	0	0	0	0	0	0	0	0	0	0	0	0	0	0	0	0	0	0	0	0	0	0	0	0	0	0	0	0	9	0	0	p__Ciliophora	g__Lacrymaria	s__Lacrymaria_marina
ASV8916	0	0	0	0	0	0	0	0	0	0	0	0	0	0	0	0	0	0	0	0	0	0	0	0	0	0	0	0	0	0	0	0	0	0	0	0	9	0	0	p__Euglenophyta	g__Phacus	s__Phacus_raciborskii
ASV8914	0	0	0	0	0	0	0	0	0	0	0	0	0	0	0	0	0	0	0	0	0	0	0	0	0	0	0	0	0	0	0	0	0	0	0	0	9	0	0	p__Chlorophyta	g__Gungnir	s__Gungnir_kasakii
ASV8912	0	0	0	0	0	0	0	0	0	0	0	0	0	0	0	0	0	0	0	0	0	0	0	0	0	0	0	0	0	0	0	0	0	0	0	0	9	0	0	p__Haptophyta	g__Coccolithus	s__Coccolithus_pelagicus
ASV8911	0	0	0	0	0	0	0	0	0	0	0	0	0	0	0	0	0	0	0	0	0	0	0	0	0	0	0	0	0	0	0	0	0	0	0	0	9	0	0	p__Sarcomastigophora	g__Nuclearia	s__Nuclearia_simplex
ASV891	0	0	0	0	0	72	9	0	0	0	0	0	0	0	0	0	0	0	0	0	107	0	44	23	28	82	0	0	0	0	0	0	0	21	0	0	57	118	68	p__Ciliophora	g__Hemiamphisiella	s__Hemiamphisiella_terricola
ASV8908	0	0	0	0	0	0	0	0	0	0	0	0	0	0	0	0	0	0	0	0	0	0	0	0	0	0	0	0	0	0	0	0	0	0	0	0	9	0	0	p__Bacillariophyta	g__Amphora	s__Amphora_terroris
ASV8900	0	0	0	0	0	0	0	0	0	0	0	0	0	0	0	0	0	0	0	0	0	0	0	0	0	0	0	0	0	0	0	0	0	0	0	0	9	0	0	p__Myxozoa	g__Myxobolus	s__Myxobolus_algonquinensis
ASV890	0	0	0	0	0	0	0	0	0	101	0	0	0	0	0	0	0	0	0	0	97	18	30	33	21	20	31	0	0	33	0	0	0	0	69	37	63	0	76	p__Ciliophora	g__Tetrahymena	s__Tetrahymena_farahensis
ASV8898	0	0	0	0	0	0	0	0	0	0	0	0	0	0	0	0	0	0	0	0	0	0	0	0	0	0	0	0	0	0	0	0	0	0	0	9	0	0	0	p__Chrysophyta	g__Paraphysomonas	s__Paraphysomonas_imperforata
ASV8896	0	0	0	0	0	0	0	0	0	0	0	0	0	0	0	0	0	0	0	0	0	0	0	0	0	0	0	0	0	0	0	0	0	0	0	2	0	0	7	p__Sarcomastigophora	g__Entamoeba	s__Entamoeba_insolita
ASV8890	0	0	0	0	0	0	0	0	0	0	0	0	0	0	0	0	0	0	0	0	0	0	0	0	0	0	0	0	0	0	0	0	0	0	0	9	0	0	0	p__Apicomplexa	g__Leidyana	s__Leidyana_migrator
ASV8888	0	0	0	0	0	0	0	0	0	0	0	0	0	0	0	0	0	0	0	0	0	0	0	0	0	0	6	0	0	0	0	0	0	0	0	3	0	0	0	p__Rhodophyta	g__Pyropia	s__Pyropia_leucosticta
ASV8887	0	0	0	0	0	0	0	0	0	0	0	0	0	0	0	0	0	0	0	0	0	0	0	0	0	0	0	0	0	0	0	0	0	0	0	9	0	0	0	p__Apicomplexa	g__Haemogregarina	s__Haemogregarina_balli
ASV8882	0	0	0	0	0	0	0	0	0	0	0	0	0	0	0	0	0	0	0	0	0	0	0	0	0	0	0	0	0	0	0	0	0	0	9	0	0	0	0	p__Dinophyta	g__Azadinium	s__Azadinium_polongum
ASV888	0	0	0	0	0	0	0	0	0	0	0	0	0	0	0	0	0	0	0	0	17	25	7	19	17	63	33	65	0	19	57	24	0	0	102	59	45	38	42	p__Bacillariophyta	g__Gyrosigma	s__Gyrosigma_acuminatum
ASV8878	0	0	0	0	0	0	0	0	0	0	0	0	0	0	0	0	0	0	0	0	0	0	0	0	0	0	4	0	0	0	0	0	0	0	5	0	0	0	0	p__Euglenophyta	g__Lepocinclis	s__Lepocinclis_salina
ASV8877	0	0	0	0	0	0	0	0	0	0	0	0	0	0	0	0	0	0	0	0	0	0	0	0	0	0	0	0	0	0	0	0	0	0	9	0	0	0	0	p__Apicomplexa	g__Gregarina	s__Gregarina_ormierei
ASV8875	0	0	0	0	0	0	0	0	0	0	0	0	0	0	0	0	0	0	0	0	0	0	0	0	0	0	0	0	0	0	0	0	0	9	0	0	0	0	0	p__Euglenophyta	g__Euglena	s__Euglena_agilis
ASV8874	0	0	0	0	0	0	0	0	0	0	0	0	0	0	0	0	0	0	0	0	0	0	0	0	0	0	0	0	0	0	0	0	0	9	0	0	0	0	0	p__Dinophyta	g__Woloszynskia	s__Woloszynskia_pascheri
ASV8871	0	0	0	0	0	0	0	0	0	0	0	0	0	0	0	0	0	0	0	0	0	0	0	0	0	0	0	0	0	0	0	9	0	0	0	0	0	0	0	p__Cryptophyta	g__Goniomonas	s__Cryptomonas_curvata
ASV8868	0	0	0	0	0	0	0	0	0	0	0	0	0	0	0	0	0	0	0	0	0	0	0	0	0	0	0	0	0	0	0	9	0	0	0	0	0	0	0	p__Euglenophyta	g__Lepocinclis	s__Lepocinclis_playfairiana
ASV8864	0	0	0	0	0	0	0	0	0	0	0	0	0	0	0	0	0	0	0	0	0	0	0	0	0	0	0	0	0	0	9	0	0	0	0	0	0	0	0	p__Euglenophyta	g__Euglenaria	s__Euglenaria_anabaena
ASV8860	0	0	0	0	0	0	0	0	0	0	0	0	0	0	0	0	0	0	0	0	0	0	0	0	0	0	0	0	0	0	9	0	0	0	0	0	0	0	0	p__Chlorophyta	g__Chlorosarcinopsis	s__Chlorosarcinopsis_eremi
ASV886	0	0	55	0	0	0	0	0	0	0	0	0	175	0	0	0	0	0	399	0	0	0	0	4	0	0	0	0	0	0	0	0	0	0	0	0	0	0	0	p__Ciliophora	g__Euplotes	s__Euplotes_elegans
ASV8856	0	0	0	0	0	0	0	0	0	0	0	0	0	0	0	0	0	0	0	0	0	0	0	0	0	0	0	0	0	0	9	0	0	0	0	0	0	0	0	p__Chlorophyta	g__Kirchneriella	s__Kirchneriella_aperta
ASV8852	0	0	0	0	0	0	0	0	0	0	0	0	0	0	0	0	0	0	0	0	0	0	0	0	0	0	0	0	0	0	9	0	0	0	0	0	0	0	0	p__Euglenophyta	g__Euglena	s__Euglena_tristella
ASV8848	0	0	0	0	0	0	0	0	0	0	0	0	0	0	0	0	0	0	0	0	0	0	0	0	0	0	0	0	0	0	9	0	0	0	0	0	0	0	0	p__Apicomplexa	g__Gregarina	s__Gregarina_caledia
ASV884	0	0	0	0	0	0	0	0	0	0	0	0	0	0	0	0	0	0	0	0	0	0	0	0	0	0	0	0	0	602	12	0	0	0	0	0	0	24	0	p__Bacillariophyta	g__Thalassiosira	s__Thalassiosira_minima
ASV8839	0	0	0	0	0	0	0	0	0	0	0	0	0	0	0	0	0	0	0	0	0	0	0	5	0	0	0	0	0	4	0	0	0	0	0	0	0	0	0	p__Rhodophyta	g__Pyropia	s__Pyropia_yezoensis
ASV8838	0	0	0	0	0	0	0	0	0	0	0	0	0	0	0	0	0	0	0	0	0	0	0	0	0	0	0	0	0	9	0	0	0	0	0	0	0	0	0	p__Apicomplexa	g__Gregarina	s__Gregarina_kingi
ASV883	0	0	0	0	0	0	0	0	0	0	0	0	0	0	0	0	0	0	0	0	25	0	0	0	131	265	218	0	0	0	0	0	0	0	0	0	0	0	0	p__Chlorophyta	g__Hafniomonas	s__Hafniomonas_montana
ASV8823	0	0	0	0	0	0	0	0	0	0	0	0	0	0	0	0	0	0	0	0	0	0	0	0	0	0	0	9	0	0	0	0	0	0	0	0	0	0	0	p__Rotifera	g__Epiphanes	s__Epiphanes_senta
ASV8822	0	0	0	0	0	0	0	0	0	0	0	0	0	0	0	0	0	0	0	0	0	0	0	0	0	0	0	9	0	0	0	0	0	0	0	0	0	0	0	p__Dinophyta	g__Azadinium	s__Azadinium_polongum
ASV8818	0	0	0	0	0	0	0	0	0	0	0	0	0	0	0	0	0	0	0	0	0	0	0	0	0	0	0	9	0	0	0	0	0	0	0	0	0	0	0	p__Euglenophyta	g__Lepocinclis	s__Lepocinclis_tripteris
ASV8796	0	0	0	0	0	0	9	0	0	0	0	0	0	0	0	0	0	0	0	0	0	0	0	0	0	0	0	0	0	0	0	0	0	0	0	0	0	0	0	p__Haptophyta	g__Pavlova	s__Pavlova_granifera
ASV8793	9	0	0	0	0	0	0	0	0	0	0	0	0	0	0	0	0	0	0	0	0	0	0	0	0	0	0	0	0	0	0	0	0	0	0	0	0	0	0	p__Dinophyta	g__Azadinium	s__Azadinium_polongum
ASV8792	0	0	0	0	0	0	0	0	0	0	0	0	0	0	0	0	0	0	9	0	0	0	0	0	0	0	0	0	0	0	0	0	0	0	0	0	0	0	0	p__Dinophyta	g__Woloszynskia	s__Woloszynskia_pascheri
ASV8785	0	0	0	0	0	0	0	0	0	0	0	0	0	0	0	0	0	0	9	0	0	0	0	0	0	0	0	0	0	0	0	0	0	0	0	0	0	0	0	p__Bacillariophyta	g__Nitzschia	s__Nitzschia_frustulum
ASV8778	0	0	0	0	0	0	0	0	0	9	0	0	0	0	0	0	0	0	0	0	0	0	0	0	0	0	0	0	0	0	0	0	0	0	0	0	0	0	0	p__Chrysophyta	g__Paraphysomonas	s__Paraphysomonas_imperforata
ASV8774	0	0	0	0	0	0	0	0	0	9	0	0	0	0	0	0	0	0	0	0	0	0	0	0	0	0	0	0	0	0	0	0	0	0	0	0	0	0	0	p__Bacillariophyta	g__Melosira	s__Melosira_varians
ASV8773	0	0	0	0	0	0	0	0	0	9	0	0	0	0	0	0	0	0	0	0	0	0	0	0	0	0	0	0	0	0	0	0	0	0	0	0	0	0	0	p__Sarcomastigophora	g__Schizoplasmodiopsis	s__Schizoplasmodiopsis_pseudoendospora
ASV8769	0	0	0	0	0	0	0	0	0	6	0	0	0	0	0	0	0	0	0	0	0	0	0	0	0	0	0	0	0	0	0	0	0	0	0	0	0	3	0	p__Rhodophyta	g__Amphiroa	s__Amphiroa_hancockii
ASV8758	0	0	0	0	0	0	0	0	0	9	0	0	0	0	0	0	0	0	0	0	0	0	0	0	0	0	0	0	0	0	0	0	0	0	0	0	0	0	0	p__Chlorophyta	g__Pedinomonas	s__Pedinomonas_minor
ASV8745	0	0	0	0	0	0	0	0	0	0	0	0	0	0	0	0	0	0	0	0	0	0	0	0	0	0	10	0	0	0	0	0	0	0	0	0	0	0	0	p__Ciliophora	g__Dexiotricha	s__Dexiotricha_granulosa
ASV874	0	0	0	0	0	0	0	0	0	0	0	0	0	0	0	0	0	0	0	0	20	0	31	29	26	78	38	19	25	64	41	0	0	22	28	27	163	40	0	p__Rotifera	g__Lepadella	s__Lepadella_patella
ASV8738	0	0	0	0	0	0	0	0	0	0	0	0	0	0	0	0	0	0	0	0	0	0	0	0	0	10	0	0	0	0	0	0	0	0	0	0	0	0	0	p__Sarcomastigophora	g__Stygamoeba	s__Stygamoeba_regulata
ASV8737	0	0	0	0	0	0	0	0	0	0	0	0	0	0	0	0	0	0	0	0	0	0	0	0	0	10	0	0	0	0	0	0	0	0	0	0	0	0	0	p__Ciliophora	g__Tunicothrix	s__Tunicothrix_brachysticha
ASV8735	0	0	0	0	0	0	0	0	0	0	0	0	0	0	0	0	0	0	0	0	0	0	0	0	0	10	0	0	0	0	0	0	0	0	0	0	0	0	0	p__Ciliophora	g__Paraspathidium	s__Paraspathidium_apofuscum
ASV8733	0	0	0	0	0	0	0	0	0	0	0	0	0	0	0	0	0	0	0	0	0	0	0	0	0	10	0	0	0	0	0	0	0	0	0	0	0	0	0	p__Apicomplexa	g__Gregarina	s__Gregarina_cuneata
ASV8732	0	0	0	0	0	0	0	0	0	0	0	0	0	0	0	0	0	0	0	0	0	0	0	0	10	0	0	0	0	0	0	0	0	0	0	0	0	0	0	p__Sarcomastigophora	g__Chlamydaster	s__Chlamydaster_sterni
ASV8728	0	0	0	0	0	0	0	0	0	0	0	0	0	0	0	0	0	0	0	0	0	0	0	10	0	0	0	0	0	0	0	0	0	0	0	0	0	0	0	p__Cryptophyta	g__Chroomonas	s__Chroomonas_mesostigmatica
ASV8724	0	0	0	0	0	0	0	0	0	0	0	0	0	0	0	0	0	0	0	0	0	0	0	10	0	0	0	0	0	0	0	0	0	0	0	0	0	0	0	p__Apicomplexa	g__Gregarina	s__Gregarina_cuneata
ASV8722	0	0	0	0	0	0	0	0	0	0	0	0	0	0	0	0	0	0	0	0	0	0	10	0	0	0	0	0	0	0	0	0	0	0	0	0	0	0	0	p__Chrysophyta	g__Ochromonas	s__Ochromonas_danica
ASV872	0	0	0	0	0	0	0	0	0	0	0	0	0	0	0	0	364	0	0	0	72	0	23	21	0	43	19	0	0	0	0	0	0	0	30	0	30	22	27	p__Ciliophora	g__Tetrahymena	s__Tetrahymena_mobilis
ASV8711	0	0	0	0	0	0	0	0	0	0	0	0	0	0	0	0	0	0	0	0	0	10	0	0	0	0	0	0	0	0	0	0	0	0	0	0	0	0	0	p__Chlorophyta	g__Hapalochloris	s__Hapalochloris_nozakii
ASV871	0	0	0	0	0	0	0	0	0	0	0	0	0	0	0	0	0	0	0	0	45	0	31	76	15	0	44	58	7	26	204	102	0	0	0	0	45	0	0	p__Ciliophora	g__Strombidinopsis	s__Strombidinopsis_batos
ASV87	0	0	0	0	0	0	0	0	0	0	0	0	0	0	0	0	0	0	0	0	114	0	121	442	463	1975	1678	731	209	157	37	0	0	15	1677	331	70	19	14	p__Chlorophyta	g__Chlamydomonas	s__Chlamydomonas_moewusii
ASV8699	0	0	0	0	0	0	0	0	0	0	0	0	0	0	0	0	0	0	0	0	10	0	0	0	0	0	0	0	0	0	0	0	0	0	0	0	0	0	0	p__Chrysophyta	g__Hibberdia	s__Hibberdia_magna
ASV8697	0	0	0	0	0	0	0	0	0	0	0	0	0	0	0	0	0	0	0	0	10	0	0	0	0	0	0	0	0	0	0	0	0	0	0	0	0	0	0	p__Sarcomastigophora	g__Cavenderia	s__Cavenderia_granulophora
ASV8688	0	0	0	0	0	0	0	0	0	0	0	0	0	0	0	0	0	0	0	0	10	0	0	0	0	0	0	0	0	0	0	0	0	0	0	0	0	0	0	p__Euglenophyta	g__Trachelomonas	s__Trachelomonas_intermedia
ASV8686	0	0	0	0	0	0	0	0	0	0	0	0	0	0	0	0	0	0	0	0	10	0	0	0	0	0	0	0	0	0	0	0	0	0	0	0	0	0	0	p__Apicomplexa	g__Aranciocystis	s__Aranciocystis_muskarensis
ASV868	0	0	0	0	0	0	0	0	0	0	0	0	0	0	0	0	0	0	0	0	0	0	173	104	90	289	0	0	0	0	0	0	0	0	0	0	0	0	0	p__Ciliophora	g__Pseudouroleptus	s__Pseudouroleptus_caudatus
ASV8678	0	0	0	0	0	0	0	0	0	0	0	0	0	0	0	0	0	0	0	0	0	0	0	0	0	0	0	0	0	0	0	0	0	0	0	0	0	0	10	p__Ciliophora	g__Bistichella	s__Bistichella_cystiformans
ASV8660	0	0	0	0	0	0	0	0	0	0	0	0	0	0	0	0	0	0	0	0	0	0	0	0	0	0	0	0	0	0	0	0	0	0	0	0	0	10	0	p__Chrysophyta	g__Epipyxis	s__Epipyxis_pulchra
ASV8656	0	0	0	0	0	0	0	0	0	0	0	0	0	0	0	0	0	0	0	0	0	0	0	0	0	0	0	0	0	0	0	0	0	0	0	0	0	10	0	p__Euglenophyta	g__Euglenaria	s__Euglenaria_clavata
ASV8644	0	0	0	0	0	0	0	0	0	0	0	0	0	0	0	0	0	0	0	0	0	0	0	0	0	0	0	0	0	0	0	0	0	0	0	0	10	0	0	p__Chrysophyta	g__Mallomonas	s__Mallomonas_tonsurata
ASV8642	0	0	0	0	0	0	0	0	0	0	0	0	0	0	0	0	0	0	0	0	0	0	0	0	0	0	0	0	0	0	0	0	0	0	0	0	10	0	0	p__Dinophyta	g__Pernambugia	s__Pernambugia_tuberosa
ASV8634	0	0	0	0	0	0	0	0	0	0	0	0	0	0	0	0	0	0	0	0	0	0	0	0	0	0	0	0	0	0	0	0	0	0	0	0	10	0	0	p__Chlorophyta	g__Desmochloris	s__Desmochloris_halophila
ASV8629	0	0	0	0	0	0	0	0	0	0	0	0	0	0	0	0	0	0	0	0	0	0	0	0	0	0	0	0	0	0	0	0	0	0	0	0	10	0	0	p__Euglenophyta	g__Euglena	s__Euglena_viridis
ASV8628	0	0	0	0	0	0	0	0	0	0	0	0	0	0	0	0	0	0	0	0	0	0	0	0	0	0	0	0	0	0	0	0	0	0	0	0	10	0	0	p__Euglenophyta	g__Trachelomonas	s__Trachelomonas_similis
ASV8625	0	0	0	0	0	0	0	0	0	0	0	0	0	0	0	0	0	0	0	0	0	0	0	0	0	0	0	0	0	0	0	0	0	0	0	0	10	0	0	p__Ciliophora	g__Strombidium	s__Strombidium_cuneiforme
ASV8604	0	0	0	0	0	0	0	0	0	0	0	0	0	0	0	0	0	0	0	0	0	0	0	0	0	0	0	0	0	0	0	0	0	0	6	0	4	0	0	p__Sarcomastigophora	g__Thalassicolla	s__Thalassicolla_nucleata
ASV8602	0	0	0	0	0	0	0	0	0	0	0	0	0	0	0	0	0	0	0	0	0	0	0	0	0	0	0	0	0	0	0	0	0	10	0	0	0	0	0	p__Ciliophora	g__Levicoleps	s__Levicoleps_biwae
ASV8601	0	0	0	0	0	0	0	0	0	0	0	0	0	0	0	0	0	0	0	0	0	0	0	0	0	0	0	0	0	0	0	0	0	10	0	0	0	0	0	p__Chlorophyta	g__Chlorococcum	s__Chlorococcum_minutum
ASV8600	0	0	0	0	0	0	0	0	0	0	0	0	0	0	0	0	0	0	0	0	0	0	0	0	0	0	0	0	0	0	0	0	0	10	0	0	0	0	0	p__Chlorophyta	g__Catena	s__Catena_viridis
ASV860	0	0	0	0	0	0	0	0	0	0	0	0	0	0	0	0	0	0	0	0	0	0	0	0	15	19	43	49	0	33	247	126	131	0	0	0	0	0	0	p__Dinophyta	g__Asulcocephalium	s__Asulcocephalium_miricentonis
ASV8598	0	0	0	0	0	0	0	0	0	0	0	0	0	0	0	0	0	0	0	0	0	0	0	0	0	0	0	0	0	0	0	0	0	10	0	0	0	0	0	p__Chlorophyta	g__Gloeotilopsis	s__Gloeotilopsis_planctonica
ASV8595	0	0	0	0	0	0	0	0	0	0	0	0	0	0	0	0	0	0	0	0	0	0	0	0	0	0	0	0	0	0	0	0	10	0	0	0	0	0	0	p__Ciliophora	g__Meseres	s__Meseres_corlissi
ASV8594	0	0	0	0	0	0	0	0	0	0	0	0	0	0	0	0	0	0	0	0	0	0	0	0	0	0	0	0	0	0	0	10	0	0	0	0	0	0	0	p__Euglenophyta	g__Phacus	s__Phacus_platalea
ASV859	0	0	0	0	0	0	39	0	0	17	0	0	0	0	0	0	0	0	223	0	21	0	0	28	0	24	42	35	0	0	43	38	0	0	0	0	20	36	97	p__Ciliophora	g__Cyclidium	s__Cyclidium_marinum
ASV8582	0	0	0	0	0	0	0	0	0	0	0	0	0	0	0	0	0	0	0	0	0	0	0	0	0	0	0	0	0	0	10	0	0	0	0	0	0	0	0	p__Euglenophyta	g__Lepocinclis	s__Lepocinclis_acus
ASV8580	0	0	0	0	0	0	0	0	0	0	0	0	0	0	0	0	0	0	0	0	0	0	0	0	0	0	0	0	0	0	5	5	0	0	0	0	0	0	0	p__Chlorophyta	g__Tetracystis	s__Tetracystis_intermedia
ASV8575	0	0	0	0	0	0	0	0	0	0	0	0	0	0	0	0	0	0	0	0	0	0	0	0	0	0	0	0	0	0	10	0	0	0	0	0	0	0	0	p__Sarcomastigophora	g__Nuclearia	s__Nuclearia_moebiusi
ASV8574	0	0	0	0	0	0	0	0	0	0	0	0	0	0	0	0	0	0	0	0	0	0	0	6	0	0	0	0	0	0	4	0	0	0	0	0	0	0	0	p__Ciliophora	g__Discophrya	s__Discophrya_collini
ASV8573	0	0	0	0	0	0	0	0	0	0	0	0	0	0	0	0	0	0	0	0	0	0	0	0	0	0	0	0	0	0	3	0	0	0	0	0	0	0	7	p__Apicomplexa	s__Colpodella	s__Colpodella_angusta
ASV8569	0	0	0	0	0	0	0	0	0	0	0	0	0	0	0	0	0	0	0	0	0	0	0	0	0	0	0	0	0	0	10	0	0	0	0	0	0	0	0	p__Euglenophyta	g__Strombomonas	s__Strombomonas_verrucosa
ASV8566	0	0	0	0	0	0	0	0	0	0	0	0	0	0	0	0	0	0	0	0	0	0	0	0	0	0	0	0	0	0	10	0	0	0	0	0	0	0	0	p__Euglenophyta	g__Phacus	s__Phacus_platyaulax
ASV8562	0	0	0	0	0	0	0	0	0	0	0	0	0	0	0	0	0	0	0	0	0	0	0	0	0	0	0	0	5	0	0	0	0	0	5	0	0	0	0	p__Chrysophyta	g__Chromulina	s__Chromulina_nebulosa
ASV855	0	0	0	0	0	0	0	0	0	0	0	0	0	0	0	0	0	0	22	569	0	47	0	0	0	0	0	0	0	0	0	0	0	0	0	0	0	31	0	p__Chlorophyta	g__Wislouchiella	s__Wislouchiella_planctonica
ASV8549	0	0	0	0	0	0	0	0	0	0	0	0	0	0	0	0	0	0	0	0	0	0	0	0	0	0	0	10	0	0	0	0	0	0	0	0	0	0	0	p__Apicomplexa	g__Leidyana	s__Leidyana_migrator
ASV8525	0	0	0	0	0	0	10	0	0	0	0	0	0	0	0	0	0	0	0	0	0	0	0	0	0	0	0	0	0	0	0	0	0	0	0	0	0	0	0	p__Cryptophyta	g__Chroomonas	s__Chroomonas_nordstedtii
ASV8520	0	0	0	0	0	0	10	0	0	0	0	0	0	0	0	0	0	0	0	0	0	0	0	0	0	0	0	0	0	0	0	0	0	0	0	0	0	0	0	p__Chlorophyta	g__Cladophora	s__Cladophora_vagabunda
ASV8511	0	0	0	0	0	0	0	0	0	0	0	0	0	0	0	0	0	0	10	0	0	0	0	0	0	0	0	0	0	0	0	0	0	0	0	0	0	0	0	p__Chrysophyta	g__Dinobryon	s__Dinobryon_sertularia
ASV8509	0	0	0	0	0	0	0	0	0	0	0	0	0	0	0	0	0	0	10	0	0	0	0	0	0	0	0	0	0	0	0	0	0	0	0	0	0	0	0	p__Bacillariophyta	g__Nitzschia	s__Nitzschia_frustulum
ASV8505	0	0	0	0	0	0	0	0	0	0	0	0	0	0	0	0	0	0	10	0	0	0	0	0	0	0	0	0	0	0	0	0	0	0	0	0	0	0	0	p__Phaeophyta	g__Saccharina	s__Saccharina_japonica
ASV8495	0	0	0	0	0	0	0	0	0	4	0	0	0	0	0	0	0	0	0	0	0	0	0	0	0	0	0	0	0	0	6	0	0	0	0	0	0	0	0	p__Ciliophora	g__Stylonychia	s__Oxytricha_trifallax
ASV8489	0	0	0	0	0	0	0	0	0	10	0	0	0	0	0	0	0	0	0	0	0	0	0	0	0	0	0	0	0	0	0	0	0	0	0	0	0	0	0	p__Chrysophyta	g__Paraphysomonas	s__Paraphysomonas_foraminifera
ASV8483	0	0	0	0	0	0	0	0	0	10	0	0	0	0	0	0	0	0	0	0	0	0	0	0	0	0	0	0	0	0	0	0	0	0	0	0	0	0	0	p__Ciliophora	g__Levicoleps	s__Levicoleps_biwae
ASV8481	0	0	0	0	0	0	0	0	0	10	0	0	0	0	0	0	0	0	0	0	0	0	0	0	0	0	0	0	0	0	0	0	0	0	0	0	0	0	0	p__Cryptophyta	g__Goniomonas	s__Cryptomonas_phaseolus
ASV8480	0	0	0	0	0	0	0	0	0	10	0	0	0	0	0	0	0	0	0	0	0	0	0	0	0	0	0	0	0	0	0	0	0	0	0	0	0	0	0	p__Chlorophyta	g__Pedinomonas	s__Pedinomonas_minor
ASV8462	0	0	0	0	0	0	0	0	0	0	0	0	0	0	0	0	0	0	0	0	0	0	0	0	0	11	0	0	0	0	0	0	0	0	0	0	0	0	0	p__Chlorophyta	g__Chlorococcum	s__Chlorococcum_aquaticum
ASV8456	0	0	0	0	0	0	0	0	0	0	0	0	0	0	0	0	0	0	0	0	0	0	0	6	5	0	0	0	0	0	0	0	0	0	0	0	0	0	0	p__Apicomplexa	g__Gregarina	s__Gregarina_kingi
ASV8446	0	0	0	0	0	0	0	0	0	0	0	0	0	0	0	0	0	0	0	0	0	11	0	0	0	0	0	0	0	0	0	0	0	0	0	0	0	0	0	p__Rotifera	g__Encentrum	s__Encentrum_tectipes
ASV8445	0	0	0	0	0	0	0	0	0	0	0	0	0	0	0	0	0	0	0	0	0	11	0	0	0	0	0	0	0	0	0	0	0	0	0	0	0	0	0	p__Ciliophora	g__Oxytricha	s__Oxytricha_granulifera
ASV8441	0	0	0	0	0	0	0	0	0	0	0	0	0	0	0	0	0	0	0	0	0	11	0	0	0	0	0	0	0	0	0	0	0	0	0	0	0	0	0	p__Chlorophyta	g__Oedogonium	s__Oedogonium_howardii_var._formosum
ASV8429	0	0	0	0	0	0	0	0	0	0	0	0	0	0	0	0	0	0	0	0	11	0	0	0	0	0	0	0	0	0	0	0	0	0	0	0	0	0	0	p__Ciliophora	g__Arcuospathidium	s__Arcuospathidium_muscorum
ASV8425	0	0	0	0	0	0	0	0	0	0	0	0	0	0	0	0	0	0	0	0	3	0	0	0	8	0	0	0	0	0	0	0	0	0	0	0	0	0	0	p__Sarcomastigophora	g__Codosiga	s__Codosiga_hollandica
ASV8413	0	0	0	0	0	0	0	0	0	0	0	0	0	0	0	0	0	0	0	0	0	0	0	0	0	0	0	0	0	0	0	0	0	0	0	0	0	0	11	p__Sarcomastigophora	g__Copromyxa	s__Copromyxa_microcystidis
ASV8409	0	0	0	0	0	0	0	0	0	0	0	0	0	0	0	0	0	0	0	0	0	0	0	0	0	0	0	0	0	0	0	0	0	0	0	0	0	0	11	p__Chrysophyta	g__Hibberdia	s__Hibberdia_magna
ASV8406	0	0	0	0	0	0	0	0	0	0	0	0	0	0	0	0	0	0	0	0	0	0	0	0	0	0	0	0	0	0	0	0	0	0	0	0	0	0	11	p__Chlorophyta	g__Cosmarium	s__Cosmarium_hammeri
ASV8405	0	0	0	0	0	0	0	0	0	0	0	0	0	0	0	0	0	0	0	0	0	0	0	0	0	0	0	0	0	0	0	0	0	0	0	0	0	0	11	p__Chlorophyta	g__Chlorococcum	s__Chlorococcum_aquaticum
ASV8401	0	0	0	0	0	0	0	0	0	0	0	0	0	0	0	0	0	0	0	0	0	0	0	0	0	0	0	0	0	0	0	0	0	0	0	0	0	0	11	p__Bacillariophyta	g__Ulnaria	s__Ulnaria_delicatissima
ASV8399	0	0	0	0	0	0	0	0	0	0	0	0	0	0	0	0	0	0	0	0	0	0	0	0	0	0	0	0	0	0	0	0	0	0	0	0	0	0	11	p__Dinophyta	g__Amphidinium	s__Amphidinium_mootonorum
ASV839	418	0	0	0	0	0	0	0	0	0	0	0	0	0	0	0	0	0	0	0	9	0	0	7	38	25	31	0	0	0	0	0	0	0	11	148	0	0	0	p__Chrysophyta	g__Pedospumella	s__Pedospumella_encystans
ASV8384	0	0	0	0	0	0	0	0	0	0	0	0	0	0	0	0	0	0	0	0	0	0	0	0	0	0	0	0	0	0	0	0	0	0	0	0	0	0	11	p__Chlorophyta	g__Chlamydomonas	s__Chlamydomonas_proboscigera
ASV838	0	0	0	0	0	0	0	0	0	47	0	0	0	230	0	0	0	0	104	0	30	0	21	0	0	12	35	57	0	0	43	21	0	0	0	0	20	15	53	p__Ciliophora	g__Dexiotricha	s__Dexiotricha_granulosa
ASV8375	0	0	0	0	0	0	0	0	0	0	0	0	0	0	0	0	0	0	0	0	0	0	0	0	0	0	0	0	0	0	0	0	0	0	0	0	0	0	11	p__Arthropoda	g__Pandarus	s__Pandarus_smithi
ASV8370	0	0	0	0	0	0	0	0	0	0	0	0	0	0	0	0	0	0	0	0	0	0	0	0	0	0	0	0	0	0	0	0	0	0	0	0	0	11	0	p__Euglenophyta	g__Euglena	s__Euglena_tristella
ASV8363	0	0	0	0	0	0	0	0	0	0	0	0	0	0	0	0	0	0	0	0	0	0	0	0	0	0	0	0	0	0	0	0	0	0	0	0	0	11	0	p__Myxozoa	g__Colpodella	s__Colpodella_tetrahymenae
ASV8356	0	0	0	0	0	0	0	0	0	0	0	0	0	0	0	0	0	0	0	0	0	0	0	0	0	0	0	0	0	0	0	0	0	0	0	0	6	5	0	p__Arthropoda	g__Daphnia	s__Daphnia_magna
ASV8355	0	0	0	0	0	0	0	0	0	0	0	0	0	0	0	0	0	0	0	0	0	0	0	0	0	0	0	0	0	0	0	0	0	0	0	0	11	0	0	p__Ciliophora	g__Microdysteria	s__Microdysteria_decora
ASV8346	0	0	0	0	0	0	0	0	0	0	0	0	0	0	0	0	0	0	0	0	0	0	0	0	0	0	0	0	0	0	0	0	0	0	0	0	11	0	0	p__Euglenophyta	g__Euglena	s__Euglena_agilis
ASV8341	0	0	0	0	0	0	0	0	0	0	0	0	0	0	0	0	0	0	0	0	0	0	0	0	0	0	0	0	0	0	0	0	0	0	0	0	4	7	0	p__Sarcomastigophora	g__Paraflabellula	s__Paraflabellula_hoguae
ASV8340	0	0	0	0	0	0	0	0	0	0	0	0	0	0	0	0	0	0	0	0	0	0	0	0	0	0	0	0	0	0	0	0	0	0	0	0	11	0	0	p__Sarcomastigophora	g__Stygamoeba	s__Stygamoeba_regulata
ASV8331	0	0	0	0	0	0	0	0	0	0	0	0	0	0	0	0	0	0	0	0	0	0	0	0	0	5	0	0	0	0	0	0	0	0	0	0	6	0	0	p__Apicomplexa	g__Gregarina	s__Gregarina_ctenocephali
ASV8328	0	0	0	0	0	0	0	0	0	0	0	0	0	0	0	0	0	0	0	0	0	0	0	0	0	0	0	0	0	0	0	0	0	0	0	0	11	0	0	p__Sarcomastigophora	g__Saccamoeba	s__Saccamoeba_limax
ASV8321	0	0	0	0	0	0	0	0	0	0	0	0	0	0	0	0	0	0	0	0	0	0	0	0	0	0	4	0	0	0	0	0	0	0	0	7	0	0	0	p__Chrysophyta	g__Chrysamoeba	s__Chrysamoeba_mikrokonta
ASV832	0	78	0	0	0	37	11	0	145	0	0	0	0	0	156	0	134	138	0	0	0	0	0	0	0	0	0	0	0	0	0	0	0	0	0	0	0	0	0	p__Sarcomastigophora	g__Protostelium	s__Protostelium_mycophagum
ASV8318	0	0	0	0	0	0	0	0	0	0	0	0	0	0	0	0	0	0	0	0	0	0	0	0	0	0	0	0	0	0	0	0	0	0	0	11	0	0	0	p__Apicomplexa	g__Gregarina	s__Gregarina_chortiocetes
ASV831	0	0	0	0	0	0	22	0	0	0	289	0	0	0	0	0	0	0	0	0	0	25	0	0	0	0	39	37	0	151	77	33	0	27	0	0	0	0	0	p__Bacillariophyta	g__Nitzschia	s__Nitzschia_thermalis
ASV8309	0	0	0	0	0	0	0	0	0	0	0	0	0	0	0	0	0	0	0	0	0	0	0	0	0	0	0	0	0	0	0	0	0	0	11	0	0	0	0	p__Apicomplexa	g__Gregarina	s__Gregarina_cuneata
ASV8305	0	0	0	0	0	0	0	0	0	0	0	0	0	0	0	0	0	0	0	0	0	0	0	0	0	0	0	0	0	0	0	0	0	11	0	0	0	0	0	p__Chlorophyta	g__Chloromonas	s__Chloromonas_vernalis
ASV8302	0	0	0	0	0	0	0	0	0	0	0	0	0	0	0	0	0	0	0	0	0	0	0	0	0	0	0	0	0	0	0	0	0	11	0	0	0	0	0	p__Sarcomastigophora	g__Vermamoeba	s__Vermamoeba_vermiformis
ASV830	214	0	0	0	0	0	0	0	0	47	0	0	0	0	0	0	0	0	0	0	83	0	38	35	34	61	51	0	0	0	20	22	59	19	0	0	11	6	0	p__Cryptophyta	g__Goniomonas	s__Cryptomonas_tetrapyrenoidosa
ASV8298	0	0	0	0	0	0	0	0	0	0	0	0	0	0	0	0	0	0	0	0	0	0	0	0	0	0	0	0	0	0	0	3	0	0	0	0	0	0	8	p__Sarcomastigophora	g__Balamuthia	s__Balamuthia_mandrillaris
ASV8297	0	0	0	0	0	0	0	0	0	0	0	0	0	0	0	0	0	0	0	0	0	0	0	0	0	0	0	0	0	0	0	11	0	0	0	0	0	0	0	p__Xanthophyta	g__Xanthonema	s__Xanthonema_debile
ASV8294	0	0	0	0	0	0	0	0	0	0	0	0	0	0	0	0	0	0	0	0	0	0	0	0	0	0	0	0	0	0	0	11	0	0	0	0	0	0	0	p__Euglenophyta	g__Phacus	s__Phacus_orbicularis
ASV8284	0	0	0	0	0	0	0	0	0	0	0	0	0	0	0	0	0	0	0	0	0	0	0	0	0	3	0	0	0	0	8	0	0	0	0	0	0	0	0	p__Chlorophyta	g__Chlamydomonas	s__Chlamydomonas_proboscigera
ASV8283	0	0	0	0	0	0	0	0	0	0	0	0	0	0	0	0	0	0	0	0	0	0	0	0	0	0	0	0	0	0	11	0	0	0	0	0	0	0	0	p__Ciliophora	g__Nothoholosticha	s__Nothoholosticha_fasciola
ASV8277	0	0	0	0	0	0	0	0	0	0	0	0	0	0	0	0	0	0	0	0	0	0	0	0	0	0	0	0	0	0	8	0	0	3	0	0	0	0	0	p__Euglenophyta	g__Euglenaria	s__Euglenaria_anabaena
ASV8264	0	0	0	0	0	0	0	0	0	0	0	0	0	0	0	0	0	0	0	0	0	0	0	0	0	0	0	11	0	0	0	0	0	0	0	0	0	0	0	p__Chlorophyta	g__Chlamydomonas	s__Chlamydomonas_applanata
ASV8262	0	0	0	0	0	0	0	0	0	0	0	0	0	0	0	0	0	0	0	0	0	0	0	0	0	0	0	11	0	0	0	0	0	0	0	0	0	0	0	p__Chlorophyta	g__Neodesmus	s__Neodesmus_pupukensis
ASV8258	0	0	0	0	0	0	0	0	0	0	0	0	0	0	0	0	0	0	0	0	0	0	0	0	0	0	0	11	0	0	0	0	0	0	0	0	0	0	0	p__Chlorophyta	g__Chlamydomonas	s__Chlamydomonas_raudensis
ASV8254	0	0	0	0	0	0	0	0	0	0	0	0	0	0	0	0	0	0	0	0	0	0	0	0	0	0	0	11	0	0	0	0	0	0	0	0	0	0	0	p__Euglenophyta	g__Euglena	s__Euglena_agilis
ASV8252	0	0	0	0	0	0	0	0	0	0	0	0	0	0	0	0	0	0	0	0	0	0	0	0	0	0	0	11	0	0	0	0	0	0	0	0	0	0	0	p__Chlorophyta	g__Gungnir	s__Gungnir_kasakii
ASV8250	0	0	0	0	0	0	0	0	0	0	0	0	0	0	0	0	0	0	0	0	0	0	0	0	0	0	0	4	0	0	0	0	0	0	0	7	0	0	0	p__Bacillariophyta	g__Planothidium	s__Planothidium_lanceolatum
ASV8247	0	0	0	0	0	0	0	0	0	0	0	0	0	0	0	0	0	0	0	0	0	0	0	0	0	0	0	8	0	0	0	3	0	0	0	0	0	0	0	p__Haptophyta	g__Pavlova	s__Pavlova_gyrans
ASV8242	0	0	0	0	0	0	0	7	0	0	0	0	0	0	0	0	0	0	0	0	0	0	0	0	0	0	0	0	4	0	0	0	0	0	0	0	0	0	0	p__Apicomplexa	g__Plasmodium	s__Plasmodium_falciparum
ASV8240	0	0	0	0	0	0	0	11	0	0	0	0	0	0	0	0	0	0	0	0	0	0	0	0	0	0	0	0	0	0	0	0	0	0	0	0	0	0	0	p__Rhodophyta	g__Porphyridium	s__Porphyridium_aerugineum
ASV8237	0	0	0	0	0	0	11	0	0	0	0	0	0	0	0	0	0	0	0	0	0	0	0	0	0	0	0	0	0	0	0	0	0	0	0	0	0	0	0	p__Ciliophora	g__Cyclidium	s__Cyclidium_glaucoma
ASV8236	0	0	0	0	0	0	11	0	0	0	0	0	0	0	0	0	0	0	0	0	0	0	0	0	0	0	0	0	0	0	0	0	0	0	0	0	0	0	0	p__Chrysophyta	g__Poteriospumella	s__Poteriospumella_lacustris
ASV8234	0	0	0	0	0	0	11	0	0	0	0	0	0	0	0	0	0	0	0	0	0	0	0	0	0	0	0	0	0	0	0	0	0	0	0	0	0	0	0	p__Bacillariophyta	g__Cymatopleura	s__Cymatopleura_solea
ASV8222	0	0	0	0	0	0	8	0	0	0	0	0	0	0	0	0	0	0	0	0	0	0	0	0	0	0	0	0	0	0	0	0	0	0	0	0	0	0	3	p__Ciliophora	g__Cyclidium	s__Cyclidium_plouneouri
ASV8199	0	0	0	0	0	0	0	0	0	0	0	0	0	0	0	0	0	0	11	0	0	0	0	0	0	0	0	0	0	0	0	0	0	0	0	0	0	0	0	p__Bacillariophyta	g__Planothidium	s__Planothidium_lanceolatum
ASV8190	0	0	0	0	0	0	0	0	0	11	0	0	0	0	0	0	0	0	0	0	0	0	0	0	0	0	0	0	0	0	0	0	0	0	0	0	0	0	0	p__Chrysophyta	g__Synura	s__Synura_petersenii
ASV818	0	0	0	0	0	0	0	0	0	0	0	0	0	0	0	0	0	0	0	0	41	0	0	0	21	0	0	0	34	61	46	49	0	0	0	43	303	117	0	p__Chlorophyta	g__Chlamydomonas	s__Chlamydomonas_applanata
ASV8179	0	0	0	0	0	0	0	0	0	11	0	0	0	0	0	0	0	0	0	0	0	0	0	0	0	0	0	0	0	0	0	0	0	0	0	0	0	0	0	p__Chrysophyta	g__Chromulina	s__Chromulina_chionophila
ASV8174	0	0	0	0	0	0	0	0	0	11	0	0	0	0	0	0	0	0	0	0	0	0	0	0	0	0	0	0	0	0	0	0	0	0	0	0	0	0	0	p__Chlorophyta	g__Chara	s__Chara_vulgaris
ASV8168	0	0	0	0	0	0	0	0	0	11	0	0	0	0	0	0	0	0	0	0	0	0	0	0	0	0	0	0	0	0	0	0	0	0	0	0	0	0	0	p__Sarcomastigophora	g__Korotnevella	s__Korotnevella_pelagolacustris
ASV8162	0	0	0	0	0	0	0	0	0	0	0	0	0	0	0	0	0	0	0	0	0	0	0	0	0	0	12	0	0	0	0	0	0	0	0	0	0	0	0	p__Ciliophora	g__Meseres	s__Meseres_corlissi
ASV8155	0	0	0	0	0	0	0	0	0	0	0	0	0	0	0	0	0	0	0	0	0	0	0	0	0	12	0	0	0	0	0	0	0	0	0	0	0	0	0	p__Chlorophyta	g__Chlamydomonas	s__Chlamydomonas_asymmetrica
ASV8154	0	0	0	0	0	0	0	0	0	0	0	0	0	0	0	0	0	0	0	0	0	0	0	0	0	12	0	0	0	0	0	0	0	0	0	0	0	0	0	p__Dinophyta	g__Prorocentrum	s__Prorocentrum_foraminosum
ASV8151	0	0	0	0	0	0	0	0	0	0	0	0	0	0	0	0	0	0	0	0	0	0	0	0	0	12	0	0	0	0	0	0	0	0	0	0	0	0	0	p__Apicomplexa	g__Gregarina	s__Gregarina_cloptoni
ASV8150	0	0	0	0	0	0	0	0	0	0	0	0	0	0	0	0	0	0	0	0	0	0	0	0	12	0	0	0	0	0	0	0	0	0	0	0	0	0	0	p__Rotifera	g__Cephalodella	s__Cephalodella_forficula
ASV815	0	0	0	0	0	80	0	0	0	0	0	0	0	0	74	0	0	0	0	0	0	0	85	136	57	113	173	0	0	0	0	0	0	0	0	0	0	0	0	p__Chlorophyta	g__Hafniomonas	s__Hafniomonas_montana
ASV8149	0	0	0	0	0	0	0	0	0	0	0	0	0	0	0	0	0	0	0	0	0	0	0	0	12	0	0	0	0	0	0	0	0	0	0	0	0	0	0	p__Rotifera	g__Ascomorpha	s__Ascomorpha_ovalis
ASV8138	0	0	0	0	0	0	0	0	0	0	0	0	0	0	0	0	0	0	0	0	0	0	2	10	0	0	0	0	0	0	0	0	0	0	0	0	0	0	0	p__Apicomplexa	g__Gregarina	s__Gregarina_ctenocephali
ASV8136	0	0	0	0	0	0	0	0	0	0	0	0	0	0	0	0	0	0	0	0	0	12	0	0	0	0	0	0	0	0	0	0	0	0	0	0	0	0	0	p__Sarcomastigophora	g__Neobodo	s__Neobodo_designis
ASV8121	0	0	0	0	0	0	0	0	0	0	0	0	0	0	0	0	0	0	0	0	12	0	0	0	0	0	0	0	0	0	0	0	0	0	0	0	0	0	0	p__Chlorophyta	g__Pumiliosphaera	s__Pumiliosphaera_acidophila
ASV8113	0	0	0	0	0	0	0	0	0	0	0	0	0	0	0	0	0	0	0	12	0	0	0	0	0	0	0	0	0	0	0	0	0	0	0	0	0	0	0	p__Chlorophyta	g__Chlamydomonas	s__Chlamydomonas_nasuta
ASV8111	0	0	0	0	0	0	0	0	0	0	0	0	0	0	0	0	0	0	0	0	0	0	0	0	0	0	0	0	0	0	0	0	0	0	0	0	0	0	12	p__Bacillariophyta	g__Nitzschia	s__Nitzschia_thermalis
ASV8106	0	0	0	0	0	0	0	0	0	0	0	0	0	0	0	0	0	0	0	0	0	0	0	0	0	0	0	0	0	0	0	0	0	0	0	0	0	0	12	p__Sarcomastigophora	g__Cryptodifflugia	s__Cryptodifflugia_oviformis
ASV8103	0	0	0	0	0	0	0	0	0	0	0	0	0	0	0	0	0	0	0	0	0	0	0	0	0	0	0	0	0	0	0	0	0	0	0	0	0	0	12	p__Sarcomastigophora	g__Neobodo	s__Neobodo_designis
ASV8094	0	0	0	0	0	0	0	0	0	0	0	0	0	0	0	0	0	0	0	0	0	0	0	0	0	0	0	0	0	0	0	0	0	0	0	0	0	0	12	p__Chlorophyta	g__Oedogonium	s__Oedogonium_angustistomum
ASV8085	0	0	0	0	0	0	0	0	0	0	0	0	0	0	0	0	0	0	0	0	0	0	0	0	0	0	7	0	0	0	0	0	0	0	0	0	0	5	0	p__Sarcomastigophora	g__Chlamydaster	s__Chlamydaster_sterni
ASV8081	0	0	0	0	0	0	0	0	0	0	0	0	0	0	0	0	0	0	0	0	0	0	0	0	0	0	0	0	0	0	0	0	0	0	0	0	0	12	0	p__Dinophyta	g__Woloszynskia	s__Woloszynskia_leopoliensis
ASV8077	0	0	0	0	0	0	0	0	0	0	0	0	0	0	0	0	0	0	0	0	0	0	0	0	0	0	0	0	0	0	0	0	0	0	0	0	0	12	0	p__Euglenophyta	g__Trachelomonas	s__Trachelomonas_hispida
ASV8076	0	0	0	0	0	0	0	0	0	0	0	0	0	0	0	0	0	0	0	0	0	0	0	0	0	0	0	0	0	0	0	0	0	0	0	0	0	12	0	p__Sarcomastigophora	g__Endostelium	s__Endostelium_crystalliferum
ASV8073	0	0	0	0	0	0	0	0	0	0	0	0	0	0	0	0	0	0	0	0	0	0	0	0	0	0	0	0	0	0	0	0	0	0	0	0	12	0	0	p__Chlorophyta	g__Trebouxia	s__Trebouxia_usneae
ASV8072	0	0	0	0	0	0	0	0	0	0	0	0	0	0	0	0	0	0	0	0	0	0	0	0	0	0	5	0	0	0	0	0	0	0	0	0	7	0	0	p__Dinophyta	g__Woloszynskia	s__Woloszynskia_pascheri
ASV8067	0	0	0	0	0	0	0	0	0	0	0	0	0	0	0	0	0	0	0	0	0	0	0	0	0	0	0	0	0	0	0	0	0	0	0	0	12	0	0	p__Ciliophora	g__Microdiaphanosoma	s__Microdiaphanosoma_arcuatum
ASV8058	0	0	0	0	0	0	0	0	0	0	0	0	0	0	0	0	0	0	0	0	0	0	0	0	0	0	0	0	0	0	0	0	0	0	0	0	12	0	0	p__Ciliophora	g__Cyclidium	s__Cyclidium_glaucoma
ASV8046	0	0	0	0	0	0	0	0	0	0	0	0	0	0	0	0	0	0	0	0	0	0	0	0	0	0	0	0	0	0	0	0	0	0	12	0	0	0	0	p__Chlorophyta	g__Chlamydomonas	s__Chlamydomonas_bacca
ASV8043	0	0	0	0	0	0	0	0	0	0	0	0	0	0	0	0	0	0	0	0	0	0	0	0	0	0	0	0	0	0	0	0	0	0	12	0	0	0	0	p__Euglenophyta	g__Euglena	s__Euglena_agilis
ASV8038	0	0	0	0	0	0	0	0	0	0	0	0	0	0	0	0	0	0	0	0	0	0	0	0	0	6	0	0	0	0	0	0	0	0	6	0	0	0	0	p__Apicomplexa	g__Hoplorhynchus	s__Hoplorhynchus_acanthatholius
ASV8036	0	0	0	0	0	0	0	0	0	0	0	0	0	0	0	0	0	0	0	0	0	0	0	0	0	0	0	0	0	0	0	0	0	0	6	0	0	6	0	p__Sarcomastigophora	g__Pseudoparamoeba	s__Pseudoparamoeba_pagei
ASV8034	0	0	0	0	0	0	0	0	0	0	0	0	0	0	0	0	0	0	0	0	0	0	0	0	0	0	4	0	0	0	0	0	0	3	0	0	5	0	0	p__Chlorophyta	g__Westella	s__Westella_botryoides
ASV8032	0	0	0	0	0	0	0	0	0	0	0	0	0	0	0	0	0	0	0	0	0	0	0	0	0	0	0	0	0	0	0	0	0	12	0	0	0	0	0	p__Ciliophora	g__Holostichides	s__Holostichides_heterotypicus
ASV8020	0	0	0	0	0	0	0	0	0	0	0	0	0	0	0	0	0	0	0	0	0	0	0	0	0	0	0	0	0	0	0	12	0	0	0	0	0	0	0	p__Euglenophyta	g__Euglena	s__Euglena_tristella
ASV8015	0	0	0	0	0	0	0	0	0	0	0	0	0	0	0	0	0	0	0	0	0	0	0	0	0	0	0	0	0	0	12	0	0	0	0	0	0	0	0	p__Xanthophyta	g__Tribonema	s__Tribonema_intermixum
ASV8014	0	0	0	0	0	0	0	0	0	0	0	0	0	0	0	0	0	0	0	0	0	0	0	0	0	0	0	0	0	0	12	0	0	0	0	0	0	0	0	p__Ciliophora	g__Anteholosticha	s__Anteholosticha_randani
ASV8013	0	0	0	0	0	0	0	0	0	0	0	0	0	0	0	0	0	0	0	0	6	0	0	0	0	0	0	0	0	0	6	0	0	0	0	0	0	0	0	p__Sarcomastigophora	g__Ichthyobodo	s__Ichthyobodo_necator
ASV8011	0	0	0	0	0	0	0	0	0	0	0	0	0	0	0	0	0	0	0	0	0	0	0	0	0	0	0	0	0	0	12	0	0	0	0	0	0	0	0	p__Apicomplexa	g__Leidyana	s__Leidyana_migrator
ASV800	0	663	0	0	0	52	0	0	0	0	0	0	0	0	0	0	0	0	13	0	0	0	0	0	0	0	0	0	0	0	0	0	0	0	0	10	0	0	0	p__Dinophyta	g__Tintinnophagus	s__Tintinnophagus_acutus
ASV7995	0	0	0	0	0	0	0	0	0	0	0	0	0	0	0	0	0	0	0	0	0	0	0	0	0	0	6	6	0	0	0	0	0	0	0	0	0	0	0	p__Chlorophyta	g__Pyrobotrys	s__Pyrobotrys_squarrosa
ASV7991	0	0	0	0	0	0	0	0	0	0	0	0	0	0	0	0	0	0	0	0	0	0	0	0	0	0	0	12	0	0	0	0	0	0	0	0	0	0	0	p__Euglenophyta	g__Strombomonas	s__Strombomonas_triquetra
ASV7989	0	0	0	0	0	0	0	0	0	0	0	0	0	0	0	0	0	0	0	0	0	0	0	0	0	0	0	7	0	0	0	0	0	0	0	0	0	5	0	p__Haptophyta	g__Phaeocystis	s__Phaeocystis_antarctica
ASV7988	0	0	0	0	0	0	0	0	0	0	0	0	0	0	0	0	0	0	0	0	0	0	0	0	0	0	0	12	0	0	0	0	0	0	0	0	0	0	0	p__Euglenophyta	g__Euglena	s__Euglena_tristella
ASV7986	0	0	0	0	0	0	0	0	0	0	0	0	0	0	0	0	0	0	0	0	0	0	0	0	0	0	0	12	0	0	0	0	0	0	0	0	0	0	0	p__Euglenophyta	g__Euglenaria	s__Euglenaria_anabaena
ASV7985	0	0	0	0	0	0	0	0	0	0	0	0	0	0	0	0	0	0	0	0	0	0	0	0	0	0	0	12	0	0	0	0	0	0	0	0	0	0	0	p__Sarcomastigophora	g__Angulamoeba	s__Angulamoeba_microcystivorans
ASV7980	0	0	0	0	0	0	0	12	0	0	0	0	0	0	0	0	0	0	0	0	0	0	0	0	0	0	0	0	0	0	0	0	0	0	0	0	0	0	0	p__Sarcomastigophora	g__Vermamoeba	s__Vermamoeba_vermiformis
ASV7975	0	0	0	0	0	0	12	0	0	0	0	0	0	0	0	0	0	0	0	0	0	0	0	0	0	0	0	0	0	0	0	0	0	0	0	0	0	0	0	p__Bacillariophyta	g__Aulacoseira	s__Aulacoseira_nyassensis
ASV7974	0	0	0	0	0	0	12	0	0	0	0	0	0	0	0	0	0	0	0	0	0	0	0	0	0	0	0	0	0	0	0	0	0	0	0	0	0	0	0	p__Bacillariophyta	g__Cymatopleura	s__Cymatopleura_solea
ASV7971	0	0	0	0	0	0	12	0	0	0	0	0	0	0	0	0	0	0	0	0	0	0	0	0	0	0	0	0	0	0	0	0	0	0	0	0	0	0	0	p__Bacillariophyta	g__Cyclotella	s__Cyclotella_meneghiniana
ASV7967	0	0	0	0	0	0	12	0	0	0	0	0	0	0	0	0	0	0	0	0	0	0	0	0	0	0	0	0	0	0	0	0	0	0	0	0	0	0	0	p__Dinophyta	g__Nusuttodinium	s__Nusuttodinium_acidotum
ASV796	0	0	0	0	159	91	0	0	0	0	0	0	0	0	0	0	0	0	0	0	197	0	100	104	22	18	21	0	0	0	22	14	0	0	0	0	0	0	0	p__Chlorophyta	g__Chlorella	s__Chlorella_coloniales
ASV7955	0	0	0	0	0	0	12	0	0	0	0	0	0	0	0	0	0	0	0	0	0	0	0	0	0	0	0	0	0	0	0	0	0	0	0	0	0	0	0	p__Chlorophyta	g__Monomastix	s__Monomastix_minuta
ASV7945	12	0	0	0	0	0	0	0	0	0	0	0	0	0	0	0	0	0	0	0	0	0	0	0	0	0	0	0	0	0	0	0	0	0	0	0	0	0	0	p__Cryptophyta	g__Hemiselmis	s__Hemiselmis_rufescens
ASV7938	0	0	0	0	0	0	0	0	0	0	0	0	0	0	0	0	0	0	12	0	0	0	0	0	0	0	0	0	0	0	0	0	0	0	0	0	0	0	0	p__Cryptophyta	g__Falcomonas	s__Falcomonas_daucoides
ASV7934	0	0	0	0	0	0	0	0	0	0	0	0	0	0	0	12	0	0	0	0	0	0	0	0	0	0	0	0	0	0	0	0	0	0	0	0	0	0	0	p__Dinophyta	g__Peridinium	s__Peridinium_cinctum
ASV7930	0	0	0	0	0	0	0	0	0	0	0	0	0	0	0	12	0	0	0	0	0	0	0	0	0	0	0	0	0	0	0	0	0	0	0	0	0	0	0	p__Ciliophora	g__Carchesium	s__Carchesium_polypinum
ASV7925	0	0	0	0	0	0	0	0	0	12	0	0	0	0	0	0	0	0	0	0	0	0	0	0	0	0	0	0	0	0	0	0	0	0	0	0	0	0	0	p__Bacillariophyta	g__Thalassiosira	s__Thalassiosira_rotula
ASV7923	0	0	0	0	0	0	0	0	0	12	0	0	0	0	0	0	0	0	0	0	0	0	0	0	0	0	0	0	0	0	0	0	0	0	0	0	0	0	0	p__Bacillariophyta	g__Cyclotella	s__Cyclotella_meneghiniana
ASV7922	0	0	0	0	0	0	0	0	0	12	0	0	0	0	0	0	0	0	0	0	0	0	0	0	0	0	0	0	0	0	0	0	0	0	0	0	0	0	0	p__Sarcomastigophora	g__Angulamoeba	s__Angulamoeba_microcystivorans
ASV7916	0	0	0	0	0	0	0	0	0	12	0	0	0	0	0	0	0	0	0	0	0	0	0	0	0	0	0	0	0	0	0	0	0	0	0	0	0	0	0	p__Bacillariophyta	g__Cyclotella	s__Cyclotella_meneghiniana
ASV7911	0	0	0	0	0	0	0	0	0	12	0	0	0	0	0	0	0	0	0	0	0	0	0	0	0	0	0	0	0	0	0	0	0	0	0	0	0	0	0	p__Bacillariophyta	g__Thalassiosira	s__Thalassiosira_rotula
ASV791	0	0	0	104	0	0	14	0	0	0	0	0	0	0	0	0	0	0	0	0	61	19	111	109	78	45	47	0	0	17	54	70	0	0	22	0	0	0	0	p__Chlorophyta	g__Monactinus	s__Monactinus_sturmii
ASV790	0	0	0	0	0	0	0	0	0	0	0	0	753	0	0	0	0	0	0	0	0	0	0	0	0	0	0	0	0	0	0	0	0	0	0	0	0	0	0	p__Ciliophora	g__Litonotus	s__Litonotus_paracygnus
ASV7898	0	0	0	0	0	0	0	0	0	0	0	0	0	0	0	0	0	0	0	0	0	0	0	0	0	0	13	0	0	0	0	0	0	0	0	0	0	0	0	p__Ciliophora	g__Bistichella	s__Bistichella_cystiformans
ASV7897	0	0	0	0	0	0	0	0	0	0	0	0	0	0	0	0	0	0	0	0	0	0	0	0	0	13	0	0	0	0	0	0	0	0	0	0	0	0	0	p__Cryptophyta	g__Chroomonas	s__Chroomonas_nordstedtii
ASV7891	0	0	0	0	0	0	0	0	0	0	0	0	0	0	0	0	0	0	0	0	0	0	0	0	13	0	0	0	0	0	0	0	0	0	0	0	0	0	0	p__Ciliophora	g__Leprotintinnus	s__Leprotintinnus_nordqvisti
ASV7890	0	0	0	0	0	0	0	0	0	0	0	0	0	0	0	0	0	0	0	0	0	0	0	0	7	0	6	0	0	0	0	0	0	0	0	0	0	0	0	p__Chlorophyta	g__Klebsormidium	s__Klebsormidium_flaccidum
ASV789	0	0	0	0	0	0	0	0	44	0	0	0	0	0	0	0	0	0	0	266	88	0	45	68	60	51	47	0	0	0	0	0	0	0	25	21	31	0	8	p__Chlorophyta	g__Pedinomonas	s__Pedinomonas_minor
ASV7872	0	0	0	0	0	0	0	0	0	0	0	0	0	0	0	0	0	0	0	0	0	13	0	0	0	0	0	0	0	0	0	0	0	0	0	0	0	0	0	p__Sarcomastigophora	g__Angulamoeba	s__Angulamoeba_microcystivorans
ASV787	0	0	0	0	0	0	0	0	0	0	0	0	0	0	0	0	0	0	0	0	0	0	0	0	58	175	193	42	0	34	94	35	0	0	0	22	0	0	102	p__Ciliophora	g__Paramecium	s__Paramecium_tetraurelia
ASV7866	0	0	0	0	0	0	0	0	0	0	0	0	0	0	0	0	0	0	0	0	6	0	0	0	0	0	7	0	0	0	0	0	0	0	0	0	0	0	0	p__Myxozoa	g__Myxobolus	s__Myxobolus_koi
ASV786	0	0	0	0	0	0	0	0	0	0	0	0	0	0	0	0	0	0	0	82	175	0	178	220	73	28	0	0	0	0	0	0	0	0	0	0	0	0	0	p__Chlorophyta	g__Yamagishiella	s__Yamagishiella_unicocca
ASV7857	0	0	0	0	0	0	0	0	0	0	0	0	0	0	0	0	0	0	0	0	0	0	0	0	0	0	0	0	0	0	0	0	0	0	0	0	0	0	13	p__Ciliophora	g__Gonostomum	s__Gonostomum_strenuum
ASV7837	0	0	0	0	0	0	0	0	0	0	0	0	0	0	0	0	0	0	0	0	0	0	0	0	0	0	0	0	0	0	0	0	0	0	0	0	0	13	0	p__Ciliophora	g__Tetrahymena	s__Tetrahymena_farahensis
ASV7836	0	0	0	0	0	0	0	0	0	0	0	0	0	0	0	0	0	0	0	0	0	0	0	0	0	0	0	0	0	0	0	0	0	0	0	0	0	13	0	p__Chlorophyta	g__Chlamydomonas	s__Chlamydomonas_parallestriata
ASV7835	0	0	0	0	0	0	0	0	0	0	0	0	0	0	0	0	0	0	0	0	0	0	0	0	0	0	0	0	0	0	0	0	0	0	0	0	0	13	0	p__Chlorophyta	g__Paulschulzia	s__Paulschulzia_pseudovolvox
ASV7833	0	0	0	0	0	0	0	0	0	0	0	0	0	0	0	0	0	0	0	0	0	0	0	0	0	0	0	0	0	0	0	0	0	0	0	0	0	13	0	p__Chlorophyta	g__Compactochlorella	s__Compactochlorella_kochii
ASV7832	0	0	0	0	0	0	0	0	0	0	0	0	0	0	0	0	0	0	0	0	0	0	0	0	0	0	0	0	0	0	0	0	0	0	0	0	13	0	0	p__Euglenophyta	g__Lepocinclis	s__Lepocinclis_playfairiana
ASV7831	0	0	0	0	0	0	0	0	0	0	0	0	0	0	0	0	0	0	0	0	0	0	0	0	0	0	0	0	0	0	0	0	0	0	0	0	13	0	0	p__Sarcomastigophora	g__Entamoeba	s__Entamoeba_insolita
ASV7830	0	0	0	0	0	0	0	0	0	0	0	0	0	0	0	0	0	0	0	0	0	0	0	0	0	0	0	0	0	0	0	0	0	0	0	0	13	0	0	p__Bacillariophyta	g__Navicula	s__Navicula_cari
ASV7826	0	0	0	0	0	0	0	0	0	0	0	0	0	0	0	0	0	0	0	0	0	0	0	0	0	0	0	0	0	0	0	0	0	0	0	0	13	0	0	p__Euglenophyta	g__Trachelomonas	s__Trachelomonas_oblonga
ASV7818	0	0	0	0	0	0	0	0	0	0	0	0	0	0	0	0	0	0	0	0	0	0	0	0	0	7	0	0	0	0	0	0	0	0	0	0	6	0	0	p__Sarcomastigophora	g__Pseudoparamoeba	s__Pseudoparamoeba_pagei
ASV7817	0	0	0	0	0	0	0	0	0	0	0	0	0	0	0	0	0	0	0	0	0	0	0	0	0	0	0	0	0	0	0	0	0	0	0	0	13	0	0	p__Chlorophyta	g__Planophila	s__Planophila_laetevirens
ASV7808	0	0	0	0	0	0	0	0	0	0	0	0	0	0	0	0	0	0	0	0	0	0	0	0	0	0	0	0	0	0	0	0	0	0	0	0	13	0	0	p__Ciliophora	g__Loxophyllum	s__Loxophyllum_shini
ASV7801	0	0	0	0	0	0	0	0	0	0	0	0	0	0	0	0	0	0	0	0	0	0	0	0	0	0	0	0	0	0	0	0	0	0	13	0	0	0	0	p__Chlorophyta	g__Kirchneriella	s__Kirchneriella_aperta
ASV7797	0	0	0	0	0	0	0	0	0	0	0	0	0	0	0	0	0	0	0	0	0	0	0	0	0	0	0	0	0	0	0	0	0	0	13	0	0	0	0	p__Chlorophyta	g__Chlamydomonas	s__Chlamydomonas_bacca
ASV7796	0	0	0	0	0	0	0	0	0	0	0	0	0	0	0	0	0	0	0	0	0	0	0	0	0	0	0	0	0	0	0	0	0	0	13	0	0	0	0	p__Apicomplexa	g__Nematopsis	s__Nematopsis_temporariae
ASV779	0	53	82	0	0	76	64	197	0	74	22	0	168	0	9	0	14	0	0	0	0	0	0	0	0	0	0	0	0	0	0	0	0	0	0	0	0	0	0	p__Ciliophora	g__Ophrydium	s__Ophrydium_versatile
ASV7788	0	0	0	0	0	0	0	0	0	0	0	0	0	0	0	0	0	0	0	0	0	0	0	0	0	0	0	0	0	0	0	0	0	13	0	0	0	0	0	p__Ciliophora	g__Leptopharynx	s__Leptopharynx_bromelicola
ASV7781	0	0	0	0	0	0	0	0	0	0	0	0	0	0	0	0	0	0	0	0	0	0	0	0	0	0	0	0	0	0	0	13	0	0	0	0	0	0	0	p__Ciliophora	g__Stichotricha	s__Stichotricha_aculeata
ASV7776	0	0	0	0	0	0	0	0	0	0	0	0	0	0	0	0	0	0	0	0	0	0	0	0	0	0	0	0	0	0	13	0	0	0	0	0	0	0	0	p__Bacillariophyta	g__Sellaphora	s__Sellaphora_seminulum
ASV7772	0	0	0	0	0	0	0	0	0	0	0	0	0	0	0	0	0	0	0	0	0	0	0	0	0	0	0	0	0	0	13	0	0	0	0	0	0	0	0	p__Bacillariophyta	g__Navicula	s__Navicula_cryptocephala
ASV7771	0	0	0	0	0	0	0	0	0	0	0	0	0	0	0	0	0	0	0	0	0	0	0	0	0	0	0	0	0	0	7	0	0	0	0	0	0	0	6	p__Sarcomastigophora	g__Hartmannella	s__Hartmannella_cantabrigiensis
ASV7766	0	0	0	0	0	0	0	0	0	0	0	0	0	0	0	0	0	0	0	0	0	0	0	0	0	0	0	0	0	0	13	0	0	0	0	0	0	0	0	p__Apicomplexa	g__Gregarina	s__Gregarina_cuneata
ASV7757	0	0	0	0	0	0	0	0	0	0	0	0	0	0	0	0	0	0	0	0	0	0	0	0	0	0	0	13	0	0	0	0	0	0	0	0	0	0	0	p__Ciliophora	g__Apocyrtolophosis	s__Apocyrtolophosis_minor
ASV7756	0	0	0	0	0	0	0	0	0	0	0	0	0	0	0	0	0	0	0	0	0	0	0	0	0	0	0	6	0	0	0	0	0	7	0	0	0	0	0	p__Euglenophyta	g__Phacus	s__Phacus_caudatus
ASV7753	0	0	0	0	0	0	0	0	0	0	0	0	0	0	0	0	0	0	0	0	0	0	0	0	0	0	0	13	0	0	0	0	0	0	0	0	0	0	0	p__Sarcomastigophora	g__Parabodo	s__Parabodo_nitrophilus
ASV7751	0	0	0	0	0	0	0	0	0	0	0	0	0	0	0	0	0	0	0	0	0	0	0	0	0	0	0	13	0	0	0	0	0	0	0	0	0	0	0	p__Chlorophyta	g__Halochlorococcum	s__Halochlorococcum_moorei
ASV7750	0	0	0	0	0	0	0	13	0	0	0	0	0	0	0	0	0	0	0	0	0	0	0	0	0	0	0	0	0	0	0	0	0	0	0	0	0	0	0	p__Sarcomastigophora	g__Rhynchomonas	s__Rhynchomonas_nasuta
ASV775	0	0	0	0	0	0	104	0	0	0	0	0	0	0	0	0	0	0	0	0	66	0	57	49	69	75	94	74	0	172	0	0	0	0	0	0	0	0	0	p__Chlorophyta	g__Dictyochloris	s__Dictyochloris_fragrans
ASV7742	0	0	0	0	0	0	6	0	0	0	0	0	0	0	0	0	0	0	0	0	0	0	0	0	0	0	0	0	0	0	0	0	0	0	0	0	0	7	0	p__Dinophyta	g__Alexandrium	s__Alexandrium_tamarense
ASV774	0	0	0	0	0	30	3	0	0	22	0	0	0	0	0	0	0	0	0	300	36	18	33	216	25	30	14	0	0	0	24	0	0	0	9	0	0	0	0	p__Chlorophyta	g__Hafniomonas	s__Hafniomonas_montana
ASV7731	0	0	0	0	0	0	13	0	0	0	0	0	0	0	0	0	0	0	0	0	0	0	0	0	0	0	0	0	0	0	0	0	0	0	0	0	0	0	0	p__Dinophyta	g__Nusuttodinium	s__Nusuttodinium_acidotum
ASV7725	0	0	0	0	0	0	0	0	0	0	0	0	0	0	0	0	0	0	13	0	0	0	0	0	0	0	0	0	0	0	0	0	0	0	0	0	0	0	0	p__Cryptophyta	g__Goniomonas	s__Cryptomonas_obovoidea
ASV7720	0	0	0	0	0	0	0	0	0	0	0	0	0	0	0	0	0	0	7	0	0	0	0	0	0	0	0	0	0	0	0	0	0	0	0	0	0	0	6	p__Ciliophora	g__Paratetrahymena	s__Paratetrahymena_wassi
ASV7718	0	0	0	0	0	0	0	0	0	0	0	0	0	0	0	0	0	0	13	0	0	0	0	0	0	0	0	0	0	0	0	0	0	0	0	0	0	0	0	p__Sarcomastigophora	g__Korotnevella	s__Korotnevella_jeppesenii
ASV7715	0	0	0	0	0	0	0	0	0	0	0	0	0	0	0	13	0	0	0	0	0	0	0	0	0	0	0	0	0	0	0	0	0	0	0	0	0	0	0	p__Sarcomastigophora	g__Bodo	s__Bodo_saltans
ASV7713	0	0	0	0	0	0	0	0	0	13	0	0	0	0	0	0	0	0	0	0	0	0	0	0	0	0	0	0	0	0	0	0	0	0	0	0	0	0	0	p__Chlorophyta	g__Polytomella	s__Polytomella_capuana
ASV7703	0	0	0	0	0	0	0	0	0	13	0	0	0	0	0	0	0	0	0	0	0	0	0	0	0	0	0	0	0	0	0	0	0	0	0	0	0	0	0	p__Chlorophyta	g__Wislouchiella	s__Wislouchiella_planctonica
ASV77	0	0	0	0	0	0	25	0	0	40	0	0	98	154	360	13	92	0	288	0	255	12	249	150	176	333	554	39	38	31	466	237	0	20	272	397	2044	835	1757	p__Ciliophora	g__Bromeliophrya	s__Bromeliophrya_brasiliensis
ASV7698	0	0	0	0	0	0	0	0	0	13	0	0	0	0	0	0	0	0	0	0	0	0	0	0	0	0	0	0	0	0	0	0	0	0	0	0	0	0	0	p__Chlorophyta	g__Pedinomonas	s__Pedinomonas_minor
ASV7685	0	0	0	0	0	0	0	0	0	0	0	0	0	0	0	0	0	0	0	0	0	0	0	0	0	0	14	0	0	0	0	0	0	0	0	0	0	0	0	p__Ciliophora	g__Tintinnidium	s__Tintinnidium_primitivum
ASV7683	0	0	0	0	0	0	0	0	0	0	0	0	0	0	0	0	0	0	0	0	0	0	0	0	0	14	0	0	0	0	0	0	0	0	0	0	0	0	0	p__Bacillariophyta	g__Planothidium	s__Planothidium_lanceolatum
ASV7675	0	0	0	0	0	0	0	0	0	0	0	0	0	0	0	0	0	0	0	0	0	0	0	4	10	0	0	0	0	0	0	0	0	0	0	0	0	0	0	p__Rhodophyta	g__Neorhodella	s__Neorhodella_cyanea
ASV7674	0	0	0	0	0	0	0	0	0	0	0	0	0	0	0	0	0	0	0	0	0	0	0	14	0	0	0	0	0	0	0	0	0	0	0	0	0	0	0	p__Apicomplexa	g__Margolisiella	s__Margolisiella_islandica
ASV7671	0	0	0	0	0	0	0	0	0	0	0	0	0	0	0	0	0	0	0	0	0	14	0	0	0	0	0	0	0	0	0	0	0	0	0	0	0	0	0	p__Ciliophora	g__Cyclidium	s__Cyclidium_glaucoma
ASV767	0	0	0	133	0	67	49	0	0	0	0	0	0	0	0	0	0	0	0	0	0	0	0	0	0	14	36	35	6	28	162	109	129	3	0	0	0	0	0	p__Cryptophyta	g__Rhodomonas	s__Rhodomonas_salina
ASV7669	0	0	0	0	0	0	0	0	0	0	0	0	0	0	0	0	0	0	0	0	0	14	0	0	0	0	0	0	0	0	0	0	0	0	0	0	0	0	0	p__Chlorophyta	g__Graesiella	s__Graesiella_emersonii
ASV7666	0	0	0	0	0	0	0	0	0	0	0	0	0	0	0	0	0	0	0	0	0	14	0	0	0	0	0	0	0	0	0	0	0	0	0	0	0	0	0	p__Ciliophora	g__Ophryoglena	s__Ophryoglena_catenula
ASV7650	0	0	0	0	0	0	0	0	0	0	0	0	0	0	0	0	0	0	0	14	0	0	0	0	0	0	0	0	0	0	0	0	0	0	0	0	0	0	0	p__Ciliophora	g__Prorodon	s__Prorodon_teres
ASV765	0	0	0	0	0	0	35	31	0	10	0	0	197	0	51	0	0	0	0	0	26	44	0	48	24	35	15	31	0	20	44	39	0	0	57	6	0	0	59	p__Sarcomastigophora	g__Vermamoeba	s__Vermamoeba_vermiformis
ASV7630	0	0	0	0	0	0	0	0	0	0	0	0	0	0	0	0	0	0	0	0	0	0	0	0	0	0	0	0	0	0	0	0	0	0	0	0	0	14	0	p__Euglenophyta	g__Trachelomonas	s__Trachelomonas_similis
ASV7626	0	0	0	0	0	0	0	0	0	0	0	0	0	0	0	0	0	0	0	0	0	0	0	0	0	0	0	0	0	0	0	0	0	0	0	0	14	0	0	p__Dinophyta	g__Woloszynskia	s__Woloszynskia_leopoliensis
ASV7625	0	0	0	0	0	0	0	0	0	0	0	0	0	0	0	0	0	0	0	0	0	0	0	0	0	0	0	0	0	0	0	0	0	0	0	0	14	0	0	p__Chlorophyta	g__Chlamydopodium	s__Chlamydopodium_vacuolatum
ASV7619	0	0	0	0	0	0	0	0	0	0	0	0	0	0	0	0	0	0	0	0	0	0	0	0	0	0	0	0	0	0	0	0	0	0	0	0	8	6	0	p__Xanthophyta	g__Botrydiopsis	s__Botrydiopsis_intercedens
ASV7614	0	0	0	0	0	0	0	0	0	0	0	0	0	0	0	0	0	0	0	0	0	0	0	0	0	0	0	0	0	0	0	0	0	0	0	0	14	0	0	p__Dinophyta	g__Woloszynskia	s__Woloszynskia_pascheri
ASV761	0	0	165	45	0	19	314	25	0	0	0	0	0	180	0	0	9	0	0	0	0	10	0	0	0	0	0	0	0	0	0	0	0	0	0	0	0	0	11	p__Ciliophora	g__Carchesium	s__Carchesium_polypinum
ASV7608	0	0	0	0	0	0	0	0	0	0	0	0	0	0	0	0	0	0	0	0	0	0	0	0	0	0	0	0	0	0	0	0	0	0	0	3	0	0	11	p__Apicomplexa	g__Gregarina	s__Gregarina_ormierei
ASV7606	0	0	0	0	0	0	0	0	0	0	0	0	0	0	0	0	0	0	0	0	0	0	0	0	0	0	0	0	0	0	0	0	0	0	0	14	0	0	0	p__Sarcomastigophora	g__Desmarella	s__Desmarella_moniliformis
ASV7604	0	0	0	0	0	0	0	0	0	0	0	0	0	0	0	0	0	0	0	0	0	0	0	0	0	0	0	0	0	0	0	0	0	0	14	0	0	0	0	p__Chlorophyta	g__Chloromonas	s__Chloromonas_perforata
ASV7595	0	0	0	0	0	0	0	0	0	0	0	0	0	0	0	0	0	0	0	0	0	0	0	0	0	0	0	0	0	0	0	0	0	0	6	0	8	0	0	p__Apicomplexa	g__Gregarina	s__Gregarina_ormierei
ASV7594	0	0	0	0	0	0	0	0	0	0	0	0	0	0	0	0	0	0	0	0	0	0	0	0	0	0	0	0	0	0	0	0	0	14	0	0	0	0	0	p__Chlorophyta	g__Spongiococcum	s__Spongiococcum_tetrasporum
ASV7590	0	0	0	0	0	0	0	0	0	0	0	0	0	0	0	0	0	0	0	0	0	0	0	0	0	0	0	0	0	0	0	14	0	0	0	0	0	0	0	p__Euglenophyta	g__Euglena	s__Euglena_longa
ASV7589	0	0	0	0	0	0	0	0	0	0	0	0	0	0	0	0	0	0	0	0	0	0	0	0	0	0	0	0	0	0	5	0	0	0	5	0	0	4	0	p__Chlorophyta	g__Chlorochytrium	s__Chlorochytrium_lemnae
ASV7587	0	0	0	0	0	0	0	0	0	0	0	0	0	0	0	0	0	0	0	0	0	0	0	0	0	0	0	0	0	0	4	10	0	0	0	0	0	0	0	p__Chlorophyta	g__Monomastix	s__Monomastix_minuta
ASV7585	0	0	0	0	0	0	0	0	0	0	0	0	0	0	0	0	0	0	0	0	0	0	0	0	0	0	0	0	0	0	5	9	0	0	0	0	0	0	0	p__Apicomplexa	g__Syncystis	s__Syncystis_mirabilis
ASV7569	0	0	0	0	0	0	0	0	0	0	0	0	0	0	0	0	0	0	0	0	0	0	0	0	0	0	0	14	0	0	0	0	0	0	0	0	0	0	0	p__Ciliophora	g__Pseudouroleptus	s__Pseudouroleptus_caudatus
ASV7562	0	0	0	0	0	0	0	0	0	0	0	0	0	0	0	0	0	0	0	0	0	0	0	0	0	0	0	14	0	0	0	0	0	0	0	0	0	0	0	p__Ciliophora	g__Loxophyllum	s__Loxophyllum_utriculariae
ASV7557	0	0	0	0	0	0	0	14	0	0	0	0	0	0	0	0	0	0	0	0	0	0	0	0	0	0	0	0	0	0	0	0	0	0	0	0	0	0	0	p__Chlorophyta	g__Desmodesmus	s__Desmodesmus_pannonicus
ASV7549	0	0	0	0	0	0	14	0	0	0	0	0	0	0	0	0	0	0	0	0	0	0	0	0	0	0	0	0	0	0	0	0	0	0	0	0	0	0	0	p__Dinophyta	g__Nusuttodinium	s__Nusuttodinium_acidotum
ASV7546	0	0	0	0	0	0	10	0	0	0	0	0	0	0	0	0	0	0	0	0	0	0	0	0	0	0	0	0	0	0	0	0	0	0	0	0	4	0	0	p__Bacillariophyta	g__Ulnaria	s__Ulnaria_delicatissima
ASV7542	0	0	0	14	0	0	0	0	0	0	0	0	0	0	0	0	0	0	0	0	0	0	0	0	0	0	0	0	0	0	0	0	0	0	0	0	0	0	0	p__Sarcomastigophora	g__Bodo	s__Bodo_saltans
ASV7540	10	0	0	0	0	0	0	0	0	0	0	0	0	0	0	0	0	0	0	0	0	0	0	4	0	0	0	0	0	0	0	0	0	0	0	0	0	0	0	p__Chrysophyta	g__Chromulina	s__Chromulina_nebulosa
ASV7533	0	0	0	0	0	0	0	0	0	0	0	0	0	0	0	0	0	0	14	0	0	0	0	0	0	0	0	0	0	0	0	0	0	0	0	0	0	0	0	p__Ciliophora	g__Stylonychia	s__Stylonychia_lemnae
ASV753	0	34	0	0	0	0	43	64	0	0	0	0	0	0	0	0	0	0	0	16	25	0	37	40	45	81	117	90	20	28	34	0	0	51	46	14	0	0	0	p__Chlorophyta	g__Carteria	s__Carteria_radiosa
ASV7527	0	0	0	0	0	0	0	0	0	0	0	0	0	0	0	0	14	0	0	0	0	0	0	0	0	0	0	0	0	0	0	0	0	0	0	0	0	0	0	p__Ciliophora	g__Chlamydonella	s__Chlamydonella_irregularis
ASV7517	0	0	0	0	0	0	0	0	0	14	0	0	0	0	0	0	0	0	0	0	0	0	0	0	0	0	0	0	0	0	0	0	0	0	0	0	0	0	0	p__Ciliophora	g__Cyclidium	s__Cyclidium_glaucoma
ASV7514	0	0	0	0	0	0	0	0	0	14	0	0	0	0	0	0	0	0	0	0	0	0	0	0	0	0	0	0	0	0	0	0	0	0	0	0	0	0	0	p__Sarcomastigophora	g__Angulamoeba	s__Angulamoeba_microcystivorans
ASV7513	0	0	0	0	0	0	0	0	0	14	0	0	0	0	0	0	0	0	0	0	0	0	0	0	0	0	0	0	0	0	0	0	0	0	0	0	0	0	0	p__Bacillariophyta	g__Gyrosigma	s__Gyrosigma_acuminatum
ASV751	0	0	0	0	0	0	0	0	0	0	0	0	0	0	0	0	0	0	0	0	0	0	22	52	0	291	421	0	0	0	0	0	0	0	0	0	0	0	0	p__Chlorophyta	g__Hafniomonas	s__Hafniomonas_reticulata
ASV7500	0	0	0	0	0	0	0	0	0	14	0	0	0	0	0	0	0	0	0	0	0	0	0	0	0	0	0	0	0	0	0	0	0	0	0	0	0	0	0	p__Cryptophyta	g__Falcomonas	s__Falcomonas_daucoides
ASV75	0	0	0	0	0	70	492	54	0	211	0	0	0	0	110	0	150	0	0	47	157	16	136	109	344	322	681	328	17	308	689	775	1044	2436	157	74	191	76	20	p__Chrysophyta	g__Mallomonas	s__Mallomonas_tonsurata
ASV7499	0	0	0	0	0	0	0	0	14	0	0	0	0	0	0	0	0	0	0	0	0	0	0	0	0	0	0	0	0	0	0	0	0	0	0	0	0	0	0	p__Bacillariophyta	g__Haslea	s__Haslea_spicula
ASV7498	0	0	0	0	0	0	0	0	14	0	0	0	0	0	0	0	0	0	0	0	0	0	0	0	0	0	0	0	0	0	0	0	0	0	0	0	0	0	0	p__Chlorophyta	g__Cladophora	s__Cladophora_vagabunda
ASV749	0	0	0	0	0	0	0	0	0	0	0	0	0	0	0	0	0	0	0	0	23	0	10	46	8	0	0	8	6	0	65	37	0	13	67	43	187	89	189	p__Apicomplexa	g__Gregarina	s__Gregarina_caledia
ASV7487	0	0	0	0	0	0	0	0	0	0	0	0	0	0	0	0	0	0	0	0	0	0	0	11	0	0	4	0	0	0	0	0	0	0	0	0	0	0	0	p__Xanthophyta	g__Gonyostomum	s__Gonyostomum_semen
ASV7484	0	0	0	0	0	0	0	0	0	0	0	0	0	0	0	0	0	0	0	0	0	0	15	0	0	0	0	0	0	0	0	0	0	0	0	0	0	0	0	p__Ciliophora	g__Arcuospathidium	s__Arcuospathidium_muscorum
ASV7483	0	0	0	0	0	0	0	0	0	0	0	0	0	0	0	0	0	0	0	0	0	0	15	0	0	0	0	0	0	0	0	0	0	0	0	0	0	0	0	p__Ciliophora	g__Lembadion	s__Lembadion_bullinum
ASV748	0	0	0	0	0	0	277	0	0	0	98	0	0	0	0	0	0	0	0	0	210	0	0	0	0	0	110	0	0	0	0	0	0	0	0	0	96	0	0	p__Ciliophora	g__Paramecium	s__Paramecium_caudatum
ASV747	0	40	0	0	53	42	0	19	0	0	0	0	0	0	0	0	0	0	0	0	74	0	22	98	38	67	70	61	0	80	0	8	0	0	20	6	96	0	0	p__Chlorophyta	g__Pedinomonas	s__Pedinomonas_minor
ASV7468	0	0	0	0	0	0	0	0	0	0	0	0	0	0	0	0	0	0	0	0	15	0	0	0	0	0	0	0	0	0	0	0	0	0	0	0	0	0	0	p__Chlorophyta	g__Aphanochaete	s__Aphanochaete_elegans
ASV7467	0	0	0	0	0	0	0	0	0	0	0	0	0	0	0	0	0	0	0	0	10	0	0	5	0	0	0	0	0	0	0	0	0	0	0	0	0	0	0	p__Dinophyta	g__Thecadinium	s__Thecadinium_mucosum
ASV7463	0	0	0	0	0	0	0	0	0	0	0	0	0	0	0	0	0	0	0	0	0	0	0	0	0	0	0	0	0	0	0	0	0	0	0	0	0	0	15	p__Ciliophora	g__Tetrahymena	s__Tetrahymena_rostrata
ASV7456	0	0	0	0	0	0	0	0	0	0	0	0	0	0	0	0	0	0	0	0	0	0	0	0	0	0	0	0	0	0	0	0	0	0	0	0	0	0	15	p__Dinophyta	g__Paulsenella	s__Paulsenella_vonstoschii
ASV7455	0	0	0	0	0	0	0	0	0	0	0	0	0	0	0	0	0	0	0	0	0	0	0	0	4	0	0	0	0	0	0	0	0	0	0	0	0	0	11	p__Apicomplexa	g__Aranciocystis	s__Aranciocystis_muskarensis
ASV745	0	0	184	0	0	0	16	303	0	27	0	0	0	0	0	43	0	0	38	0	0	0	0	0	0	0	0	0	0	0	92	76	0	0	0	0	0	0	17	p__Ciliophora	g__Holosticha	s__Holosticha_diademata
ASV7447	0	0	0	0	0	0	0	0	0	0	0	0	0	0	0	0	0	0	0	0	0	0	0	0	0	0	0	0	0	0	0	0	0	0	0	0	0	9	6	p__Ciliophora	g__Dexiotricha	s__Dexiotricha_granulosa
ASV7446	0	0	0	0	0	0	0	0	0	0	0	0	0	0	0	0	0	0	0	0	0	0	0	0	0	0	0	0	0	0	0	0	0	0	0	0	0	15	0	p__Euglenophyta	g__Lepocinclis	s__Lepocinclis_acus
ASV7444	0	0	0	0	0	0	0	0	0	0	0	0	0	0	0	0	0	0	0	0	5	0	0	0	0	0	0	0	0	0	0	0	0	0	0	0	4	0	6	p__Sarcomastigophora	g__Copromyxa	s__Copromyxa_microcystidis
ASV7440	0	0	0	0	0	0	0	0	0	0	0	0	0	0	0	0	0	0	0	0	0	0	0	0	0	0	0	0	0	0	0	0	0	0	0	0	7	0	8	p__Cryptophyta	g__Hemiselmis	s__Hemiselmis_brunnescens
ASV7439	0	0	0	0	0	0	0	0	0	0	0	0	0	0	0	0	0	0	0	0	0	0	0	0	0	0	0	0	0	0	0	0	0	0	0	0	15	0	0	p__Euglenophyta	g__Trachelomonas	s__Trachelomonas_planctonica
ASV7436	0	0	0	0	0	0	0	0	0	0	0	0	0	0	0	0	0	0	0	0	0	0	0	0	0	0	0	0	0	0	0	0	0	0	0	0	15	0	0	p__Chlorophyta	g__Bracteacoccus	s__Bracteacoccus_bohemiensis
ASV7430	0	0	0	0	0	0	0	0	0	0	0	0	0	0	0	0	0	0	0	0	0	0	0	0	0	0	0	0	0	0	0	0	0	0	0	0	15	0	0	p__Euglenophyta	g__Lepocinclis	s__Lepocinclis_buetschlii
ASV7425	0	0	0	0	0	0	0	0	0	0	0	0	0	0	0	0	0	0	0	0	0	0	0	0	0	0	10	0	0	0	0	0	0	0	0	5	0	0	0	p__Euglenophyta	g__Cyclidiopsis	s__Cyclidiopsis_acus
ASV7422	0	0	0	0	0	0	0	0	0	0	0	0	0	0	0	0	0	0	0	0	0	0	0	0	0	0	0	0	0	0	0	0	0	0	3	0	0	0	12	p__Apicomplexa	g__Syncystis	s__Syncystis_mirabilis
ASV7413	0	0	0	0	0	0	0	0	0	0	0	0	0	0	0	0	0	0	0	0	0	0	0	0	0	0	0	0	0	0	0	0	0	6	0	0	9	0	0	p__Dinophyta	g__Gonyaulax	s__Gonyaulax_polygramma
ASV7409	0	0	0	0	0	0	0	0	0	0	0	0	0	0	0	0	0	0	0	0	8	0	3	0	0	0	0	0	0	0	0	4	0	0	0	0	0	0	0	p__Sarcomastigophora	g__Entamoeba	s__Entamoeba_equi
ASV7407	0	0	0	0	0	0	0	0	0	0	0	0	0	0	0	0	0	0	0	0	0	0	9	0	0	0	0	0	0	0	2	0	0	0	4	0	0	0	0	p__Apicomplexa	g__Gregarina	s__Gregarina_cloptoni
ASV7403	0	0	0	0	0	0	0	0	0	0	0	0	0	0	0	0	0	0	0	0	0	0	0	0	0	0	0	0	0	0	10	5	0	0	0	0	0	0	0	p__Chlorophyta	g__Botryococcus	s__Botryococcus_braunii
ASV7399	0	0	0	0	0	0	0	0	0	0	0	0	0	0	0	0	0	0	0	0	0	0	0	0	0	0	0	0	0	0	15	0	0	0	0	0	0	0	0	p__Apicomplexa	g__Adelina	s__Adelina_dimidiata
ASV7398	0	0	0	0	0	0	0	0	0	0	0	0	0	0	0	0	0	0	0	0	0	0	0	0	0	0	0	0	0	0	15	0	0	0	0	0	0	0	0	p__Euglenophyta	g__Lepocinclis	s__Lepocinclis_spirogyroides
ASV7395	0	0	0	0	0	0	0	0	0	0	0	0	0	0	0	0	0	0	0	0	0	0	0	0	0	0	0	0	0	15	0	0	0	0	0	0	0	0	0	p__Chlorophyta	g__Didymogenes	s__Didymogenes_anomala
ASV7389	0	0	0	0	0	0	0	0	0	0	0	0	0	0	0	0	0	0	0	0	0	0	0	0	0	0	0	0	6	0	0	0	0	0	9	0	0	0	0	p__Sarcomastigophora	g__Angulamoeba	s__Angulamoeba_microcystivorans
ASV7388	0	0	0	0	0	0	0	0	0	0	0	0	0	0	0	0	0	0	0	0	0	0	0	0	0	0	0	0	2	0	0	0	0	0	0	0	3	10	0	p__Apicomplexa	g__Cryptosporidium	s__Cryptosporidium_muris
ASV7385	0	0	0	0	0	0	0	0	0	0	0	0	0	0	0	0	0	0	0	0	0	0	0	0	0	0	0	3	12	0	0	0	0	0	0	0	0	0	0	p__Chlorophyta	g__Pascherina	s__Pascherina_tetras
ASV7380	0	0	0	0	0	0	0	0	0	0	0	0	0	0	0	0	0	0	0	0	0	0	0	0	0	0	0	6	0	0	9	0	0	0	0	0	0	0	0	p__Dinophyta	g__Amphidinium	s__Amphidinium_mootonorum
ASV738	0	0	0	0	0	0	0	0	0	0	0	0	0	0	0	0	0	0	0	0	0	0	69	82	126	0	0	0	23	37	258	159	55	0	0	0	0	0	0	p__Chlorophyta	g__Desmodesmus	s__Desmodesmus_pannonicus
ASV7376	0	0	0	0	0	0	0	0	0	0	0	0	0	0	0	0	0	0	0	0	0	0	0	0	0	0	0	15	0	0	0	0	0	0	0	0	0	0	0	p__Ciliophora	g__Tintinnidium	s__Tintinnidium_primitivum
ASV737	0	97	0	0	0	62	55	0	0	28	0	0	0	0	0	0	0	0	0	0	43	0	71	133	109	132	59	0	0	0	0	0	0	0	0	0	0	20	0	p__Chlorophyta	g__Compactochlorella	s__Compactochlorella_kochii
ASV7367	0	0	0	0	0	0	0	0	0	0	0	0	0	0	0	0	0	0	0	0	0	0	0	0	0	0	0	15	0	0	0	0	0	0	0	0	0	0	0	p__Arthropoda	g__Cyclops	s__Cyclops_kolensis_kolensis
ASV736	0	0	0	0	0	0	83	24	0	140	0	0	205	0	0	0	0	0	35	0	30	36	8	13	0	22	15	10	0	0	31	27	0	58	0	0	63	10	0	p__Cryptophyta	g__Goniomonas	s__Cryptomonas_obovoidea
ASV7353	0	0	0	0	0	0	15	0	0	0	0	0	0	0	0	0	0	0	0	0	0	0	0	0	0	0	0	0	0	0	0	0	0	0	0	0	0	0	0	p__Chrysophyta	g__Chromulina	s__Chromulina_chionophila
ASV7350	0	0	0	0	0	0	10	0	0	0	0	0	0	0	0	0	0	0	0	0	0	0	0	0	0	0	0	0	0	5	0	0	0	0	0	0	0	0	0	p__Sarcomastigophora	g__Chlamydaster	s__Chlamydaster_sterni
ASV7348	0	0	0	0	0	0	15	0	0	0	0	0	0	0	0	0	0	0	0	0	0	0	0	0	0	0	0	0	0	0	0	0	0	0	0	0	0	0	0	p__Bacillariophyta	g__Thalassiosira	s__Thalassiosira_rotula
ASV7347	0	15	0	0	0	0	0	0	0	0	0	0	0	0	0	0	0	0	0	0	0	0	0	0	0	0	0	0	0	0	0	0	0	0	0	0	0	0	0	p__Chlorophyta	g__Micractinium	s__Micractinium_pusillum
ASV7338	0	0	0	0	0	0	0	0	0	0	0	0	0	0	0	0	0	0	15	0	0	0	0	0	0	0	0	0	0	0	0	0	0	0	0	0	0	0	0	p__Chlorophyta	g__Pedinomonas	s__Pedinomonas_minor
ASV7329	0	0	0	0	0	0	0	0	0	0	0	0	0	0	0	0	0	0	15	0	0	0	0	0	0	0	0	0	0	0	0	0	0	0	0	0	0	0	0	p__Chlorophyta	g__Chlamydomonas	s__Chlamydomonas_gloeophila
ASV7326	0	0	0	0	0	0	0	0	0	0	0	0	0	0	0	0	0	0	15	0	0	0	0	0	0	0	0	0	0	0	0	0	0	0	0	0	0	0	0	p__Chrysophyta	g__Mallomonas	s__Mallomonas_akrokomos
ASV7323	0	0	0	0	0	0	0	0	0	0	0	0	0	0	0	15	0	0	0	0	0	0	0	0	0	0	0	0	0	0	0	0	0	0	0	0	0	0	0	p__Sarcomastigophora	g__Parabodo	s__Parabodo_nitrophilus
ASV7321	0	0	0	0	0	0	0	0	0	15	0	0	0	0	0	0	0	0	0	0	0	0	0	0	0	0	0	0	0	0	0	0	0	0	0	0	0	0	0	p__Cryptophyta	g__Goniomonas	s__Cryptomonas_curvata
ASV7315	0	0	0	0	0	0	0	0	0	15	0	0	0	0	0	0	0	0	0	0	0	0	0	0	0	0	0	0	0	0	0	0	0	0	0	0	0	0	0	p__Chrysophyta	g__Chromulina	s__Chromulina_chionophila
ASV7309	0	0	0	0	0	0	0	0	0	15	0	0	0	0	0	0	0	0	0	0	0	0	0	0	0	0	0	0	0	0	0	0	0	0	0	0	0	0	0	p__Ciliophora	g__Chilodonella	s__Chilodonella_acuta
ASV7305	0	0	0	0	0	0	0	0	0	15	0	0	0	0	0	0	0	0	0	0	0	0	0	0	0	0	0	0	0	0	0	0	0	0	0	0	0	0	0	p__Rhodophyta	g__Pyropia	s__Pyropia_yezoensis
ASV730	0	62	0	220	0	0	8	12	0	135	0	0	0	0	0	0	0	0	0	21	73	0	33	31	39	32	63	25	0	0	0	0	0	0	0	0	11	4	52	p__Bacillariophyta	g__Thalassiosira	s__Thalassiosira_pseudonana
ASV7292	0	0	0	0	0	0	0	0	0	0	0	0	0	0	0	0	0	0	0	0	0	0	0	0	0	16	0	0	0	0	0	0	0	0	0	0	0	0	0	p__Apicomplexa	g__Gregarina	s__Gregarina_cuneata
ASV729	0	0	0	0	0	0	0	0	0	0	0	0	0	0	0	0	0	0	0	0	0	0	21	0	0	0	0	0	0	0	0	0	0	0	801	0	0	0	0	p__Chlorophyta	g__Wislouchiella	s__Wislouchiella_planctonica
ASV7284	0	0	0	0	0	0	0	0	0	0	0	0	0	0	0	0	0	0	0	0	0	16	0	0	0	0	0	0	0	0	0	0	0	0	0	0	0	0	0	p__Bacillariophyta	g__Cyclotella	s__Cyclotella_scaldensis
ASV727	0	0	0	0	0	0	0	0	0	0	0	0	0	0	0	0	0	0	0	354	47	54	16	46	0	83	39	38	29	0	0	0	0	0	104	0	13	0	0	p__Chlorophyta	g__Wislouchiella	s__Wislouchiella_planctonica
ASV7259	0	0	0	0	0	0	0	0	0	0	0	0	0	0	0	0	0	0	0	0	0	0	0	0	0	0	0	0	0	0	0	0	0	0	0	0	0	0	16	p__Ciliophora	g__Trochiliopsis	s__Trochiliopsis_australis
ASV7248	0	0	0	0	0	0	0	0	0	0	0	0	0	0	0	0	0	0	0	0	0	0	0	0	0	0	0	0	0	0	0	0	0	0	0	0	0	0	16	p__Chrysophyta	g__Pedospumella	s__Pedospumella_encystans
ASV7246	0	0	0	0	0	0	0	0	0	0	0	0	0	0	0	0	0	0	0	0	0	0	0	0	0	0	0	0	0	0	0	0	0	0	0	0	0	0	16	p__Apicomplexa	g__Nematopsis	s__Nematopsis_temporariae
ASV7241	0	0	0	0	0	0	0	0	0	0	0	0	0	0	0	0	0	0	0	0	0	0	0	0	0	0	0	0	0	0	0	0	0	0	0	0	0	0	16	p__Sarcomastigophora	g__Paulinella	s__Paulinella_chromatophora
ASV7239	0	0	0	0	0	0	0	0	0	0	0	0	0	0	0	0	0	0	0	0	0	0	0	0	0	0	0	0	0	0	0	0	0	0	0	0	0	0	16	p__Ciliophora	g__Pseudomicrothorax	s__Pseudomicrothorax_dubius
ASV7227	0	0	0	0	0	0	0	0	0	0	0	0	0	0	0	0	0	0	0	0	0	0	0	0	0	0	0	0	0	0	0	0	0	0	0	0	16	0	0	p__Chlorophyta	g__Bracteacoccus	s__Bracteacoccus_bohemiensis
ASV7225	0	0	0	0	0	0	0	0	0	0	0	0	0	0	0	0	0	0	0	0	0	0	0	0	0	0	0	0	0	0	0	0	0	0	0	0	16	0	0	p__Chrysophyta	g__Chromulina	s__Chromulina_chionophila
ASV7224	0	0	0	0	0	0	0	0	0	0	0	0	0	0	0	0	0	0	0	0	0	0	0	0	0	0	0	0	0	0	0	0	0	0	0	0	16	0	0	p__Chlorophyta	g__Chlamydomonas	s__Chlamydomonas_reinhardtii
ASV7216	0	0	0	0	0	0	0	0	0	0	0	0	0	0	0	0	0	0	0	0	0	0	0	0	0	0	0	0	0	0	0	0	0	0	0	16	0	0	0	p__Ciliophora	g__Meseres	s__Meseres_corlissi
ASV721	0	0	35	69	0	0	51	10	0	0	0	0	0	0	0	0	0	0	0	0	146	0	0	59	60	56	84	0	0	27	74	27	0	0	49	0	0	79	0	p__Ciliophora	g__Hemiophrys	s__Hemiophrys_procera
ASV7207	0	0	0	0	0	0	0	0	0	0	0	0	0	0	0	0	0	0	0	0	0	0	0	0	0	0	0	0	0	0	0	0	0	0	16	0	0	0	0	p__Apicomplexa	g__Leidyana	s__Leidyana_migrator
ASV7204	0	0	0	0	0	0	0	0	0	0	0	0	0	0	0	0	0	0	0	0	0	0	0	0	0	0	0	0	0	0	0	0	0	16	0	0	0	0	0	p__Chrysophyta	g__Synura	s__Synura_petersenii
ASV7203	0	0	0	0	0	0	0	0	0	0	0	0	0	0	0	0	0	0	0	0	8	0	0	0	0	0	0	0	0	0	0	0	0	8	0	0	0	0	0	p__Euglenophyta	g__Euglena	s__Euglena_tristella
ASV7201	0	0	0	0	0	0	0	0	0	0	0	0	0	0	0	0	0	0	0	0	0	0	0	0	0	0	0	0	0	0	0	0	0	16	0	0	0	0	0	p__Chlorophyta	g__Wislouchiella	s__Wislouchiella_planctonica
ASV7199	0	0	0	0	0	0	0	0	0	0	0	0	0	0	0	0	0	0	0	0	0	0	0	0	0	0	0	0	0	0	0	0	0	16	0	0	0	0	0	p__Euglenophyta	g__Euglena	s__Euglena_agilis
ASV7197	0	0	0	0	0	0	0	0	0	0	0	0	0	0	0	0	0	0	0	0	0	0	0	0	0	0	0	0	0	0	0	16	0	0	0	0	0	0	0	p__Ciliophora	g__Trithigmostoma	s__Trithigmostoma_steini
ASV7194	0	0	0	0	0	0	0	0	0	0	0	0	0	0	0	0	0	0	0	0	0	0	0	0	0	0	0	0	0	0	16	0	0	0	0	0	0	0	0	p__Chlorophyta	g__Oedogonium	s__Oedogonium_angustistomum
ASV7193	0	0	0	0	0	0	0	0	0	0	0	0	0	0	0	0	0	0	0	0	0	0	0	0	0	0	0	0	0	0	16	0	0	0	0	0	0	0	0	p__Bacillariophyta	g__Fistulifera	s__Fistulifera_pelliculosa
ASV7192	0	0	0	0	0	0	0	0	0	0	0	0	0	0	0	0	0	0	0	0	0	0	0	0	0	0	0	0	0	0	13	3	0	0	0	0	0	0	0	p__Euglenophyta	g__Euglena	s__Euglena_tristella
ASV7191	0	0	0	0	0	0	0	0	0	0	0	0	0	0	0	0	0	0	0	0	0	0	0	0	0	0	0	0	0	0	16	0	0	0	0	0	0	0	0	p__Chlorophyta	g__Deasonia	s__Deasonia_multinucleata
ASV7188	0	0	0	0	0	0	0	0	0	0	0	0	0	0	0	0	0	0	0	0	0	0	0	0	0	0	0	0	0	0	9	7	0	0	0	0	0	0	0	p__Apicomplexa	g__Ascogregarina	s__Ascogregarina_barretti
ASV7183	0	0	0	0	0	0	0	0	0	0	0	0	0	0	0	0	0	0	0	0	0	0	0	0	0	0	0	0	16	0	0	0	0	0	0	0	0	0	0	p__Chrysophyta	g__Paraphysomonas	s__Paraphysomonas_foraminifera
ASV7174	0	0	0	0	0	0	0	0	0	0	0	0	0	0	0	0	0	0	0	0	0	0	0	0	0	0	0	6	0	0	0	0	0	10	0	0	0	0	0	p__Ciliophora	g__Ichthyophthirius	s__Ichthyophthirius_multifiliis
ASV7172	0	0	0	0	0	0	0	0	0	0	0	0	0	0	0	0	0	0	0	0	0	0	0	0	0	0	0	16	0	0	0	0	0	0	0	0	0	0	0	p__Ciliophora	g__Anteholosticha	s__Anteholosticha_gracilis
ASV7164	0	0	0	0	0	0	0	16	0	0	0	0	0	0	0	0	0	0	0	0	0	0	0	0	0	0	0	0	0	0	0	0	0	0	0	0	0	0	0	p__Sarcomastigophora	g__Ichthyobodo	s__Ichthyobodo_necator
ASV7148	0	0	0	0	0	0	0	0	0	0	0	0	0	0	0	0	0	0	16	0	0	0	0	0	0	0	0	0	0	0	0	0	0	0	0	0	0	0	0	p__Bacillariophyta	g__Surirella	s__Surirella_tenera
ASV7145	0	0	0	0	0	0	0	0	0	0	0	0	0	0	0	0	0	0	16	0	0	0	0	0	0	0	0	0	0	0	0	0	0	0	0	0	0	0	0	p__Cryptophyta	g__Falcomonas	s__Falcomonas_daucoides
ASV7126	0	0	0	0	0	0	0	0	0	7	0	0	0	0	0	0	0	0	0	0	0	0	0	0	0	0	0	0	0	9	0	0	0	0	0	0	0	0	0	p__Chlorophyta	g__Uronema	s__Uronema_acuminatum
ASV7116	0	0	0	0	0	0	0	0	0	0	0	0	0	0	0	0	0	0	0	0	0	0	0	0	0	0	17	0	0	0	0	0	0	0	0	0	0	0	0	p__Ciliophora	g__Urocentrum	s__Urocentrum_turbo
ASV7110	0	0	0	0	0	0	0	0	0	0	0	0	0	0	0	0	0	0	0	0	0	0	0	6	4	7	0	0	0	0	0	0	0	0	0	0	0	0	0	p__Sarcomastigophora	g__Vermamoeba	s__Vermamoeba_vermiformis
ASV7102	0	0	0	0	0	0	0	0	0	0	0	0	0	0	0	0	0	0	0	0	17	0	0	0	0	0	0	0	0	0	0	0	0	0	0	0	0	0	0	p__Chlorophyta	g__Spermatozopsis	s__Spermatozopsis_similis
ASV710	0	0	0	0	0	0	0	0	0	0	0	0	0	0	0	0	0	0	0	0	13	0	0	26	0	611	189	0	0	0	0	0	0	0	0	0	0	0	0	p__Chlorophyta	g__Hafniomonas	s__Hafniomonas_montana
ASV7098	0	0	0	0	0	0	0	0	0	0	0	0	0	0	0	0	0	0	0	0	8	0	3	6	0	0	0	0	0	0	0	0	0	0	0	0	0	0	0	p__Cryptophyta	g__Goniomonas	s__Cryptomonas_pyrenoidifera
ASV7093	0	0	0	0	0	0	0	0	0	0	0	0	0	0	0	0	0	0	0	0	0	0	0	0	0	0	0	0	0	0	0	0	0	0	0	0	0	0	17	p__Chlorophyta	g__Neochlorosarcina	s__Neochlorosarcina_negevensis
ASV7083	0	0	0	0	0	0	0	0	0	0	0	0	0	0	0	0	0	0	0	0	0	0	0	0	0	0	0	0	0	0	0	0	0	0	0	0	0	0	17	p__Ciliophora	g__Oxytricha	s__Oxytricha_ferruginea
ASV7079	0	0	0	0	0	0	0	0	0	0	0	0	0	0	0	0	0	0	0	0	0	0	0	0	0	0	0	0	0	0	0	0	0	0	0	0	0	17	0	p__Ciliophora	g__Tetrahymena	s__Tetrahymena_mobilis
ASV707	0	0	0	0	0	0	0	0	0	0	0	0	0	0	0	0	0	0	0	21	0	0	0	22	22	404	368	0	0	12	0	0	0	0	0	0	0	0	0	p__Chlorophyta	g__Hafniomonas	s__Hafniomonas_montana
ASV7055	0	0	0	0	0	0	0	0	0	0	0	0	0	0	0	0	0	0	0	0	0	0	0	0	0	0	0	0	0	0	0	0	0	0	17	0	0	0	0	p__Rotifera	g__Brachionus	s__Brachionus_calyciflorus
ASV7054	0	0	0	0	0	0	0	0	0	0	0	0	0	0	0	0	0	0	0	0	0	0	0	0	0	0	0	0	0	0	0	0	0	0	17	0	0	0	0	p__Chlorophyta	g__Tetracystis	s__Tetracystis_intermedia
ASV7043	0	0	0	0	0	0	0	0	0	0	0	0	0	0	0	0	0	0	0	0	0	0	0	0	0	0	0	0	0	0	0	17	0	0	0	0	0	0	0	p__Chlorophyta	g__Actinochloris	s__Actinochloris_sphaerica
ASV7042	0	0	0	0	0	0	0	0	0	0	0	0	0	0	0	0	0	0	0	0	0	0	0	0	0	0	0	0	0	0	0	17	0	0	0	0	0	0	0	p__Chlorophyta	g__Haematococcus	s__Haematococcus_lacustris
ASV7040	0	0	0	0	0	0	0	0	0	0	0	0	0	0	0	0	0	0	0	0	0	0	0	0	0	0	0	0	0	0	17	0	0	0	0	0	0	0	0	p__Ciliophora	g__Cyclidium	s__Cyclidium_glaucoma
ASV704	35	0	0	0	0	0	12	0	0	0	0	0	0	0	0	0	0	0	19	0	123	0	65	68	146	66	63	23	12	0	0	35	4	58	42	63	6	11	0	p__Cryptophyta	g__Chroomonas	s__Chroomonas_nordstedtii
ASV7038	0	0	0	0	0	0	0	0	0	0	0	0	0	0	0	0	0	0	0	0	0	0	0	0	0	0	0	0	0	0	17	0	0	0	0	0	0	0	0	p__Ciliophora	g__Agolohymena	s__Agolohymena_aspidocauda
ASV7034	0	0	0	0	0	0	0	0	0	0	0	0	0	0	0	0	0	0	0	0	0	0	0	0	0	0	0	0	0	0	4	0	0	0	0	0	0	0	13	p__Euglenophyta	g__Euglena	s__Euglena_deses
ASV7032	0	0	0	0	0	0	0	0	0	0	0	0	0	0	0	0	0	0	0	0	14	0	0	0	0	0	0	0	0	0	3	0	0	0	0	0	0	0	0	p__Chlorophyta	g__Cosmocladium	s__Cosmocladium_saxonicum
ASV7031	0	0	0	0	0	0	0	0	0	0	0	0	0	0	0	0	0	0	0	0	0	0	0	0	0	0	0	0	0	0	17	0	0	0	0	0	0	0	0	p__Chlorophyta	g__Chlorochytrium	s__Chlorochytrium_lemnae
ASV7023	0	0	0	0	0	0	0	0	0	0	0	0	0	0	0	0	0	0	0	0	0	0	0	0	0	0	0	0	4	0	0	0	0	13	0	0	0	0	0	p__Xanthophyta	g__Ophiocytium	s__Ophiocytium_capitatum
ASV7022	0	0	0	0	0	0	0	0	0	0	0	0	0	0	0	0	0	0	0	0	0	0	0	0	0	0	0	8	0	0	9	0	0	0	0	0	0	0	0	p__Chlorophyta	g__Chlorochytrium	s__Chlorochytrium_lemnae
ASV7017	0	0	0	0	0	0	0	0	0	0	0	0	0	0	0	0	0	0	0	0	0	0	0	0	0	0	0	5	0	0	0	0	0	12	0	0	0	0	0	p__Apicomplexa	g__Gregarina	s__Gregarina_cuneata
ASV7008	0	0	0	0	0	0	0	17	0	0	0	0	0	0	0	0	0	0	0	0	0	0	0	0	0	0	0	0	0	0	0	0	0	0	0	0	0	0	0	p__Chrysophyta	g__Ochromonas	s__Ochromonas_marina
ASV7007	0	0	0	0	0	0	17	0	0	0	0	0	0	0	0	0	0	0	0	0	0	0	0	0	0	0	0	0	0	0	0	0	0	0	0	0	0	0	0	p__Chrysophyta	g__Pedospumella	s__Pedospumella_encystans
ASV7006	0	0	0	0	0	0	17	0	0	0	0	0	0	0	0	0	0	0	0	0	0	0	0	0	0	0	0	0	0	0	0	0	0	0	0	0	0	0	0	p__Dinophyta	g__Nusuttodinium	s__Nusuttodinium_acidotum
ASV7003	0	0	0	0	0	0	5	0	0	0	0	0	0	0	0	0	0	0	0	0	0	0	0	0	0	0	0	0	0	0	6	0	0	0	0	0	0	0	6	p__Ciliophora	g__Condylostoma	s__Condylostoma_magnum
ASV7000	0	5	0	0	0	0	0	0	0	0	0	0	0	0	0	0	0	0	0	0	0	0	0	0	0	0	0	0	9	0	3	0	0	0	0	0	0	0	0	p__Euglenophyta	g__Euglena	s__Euglena_viridis
ASV7	3964	375	326	584	1465	483	1030	200	733	903	269	0	0	0	0	18	0	0	66	108	9241	77	5993	5591	3639	4624	3421	1701	60	552	1623	2391	7219	2593	890	1688	2928	991	77	p__Cryptophyta	g__Goniomonas	s__Cryptomonas_pyrenoidifera
ASV6994	0	0	0	0	0	0	0	0	0	0	0	0	0	0	0	0	0	0	17	0	0	0	0	0	0	0	0	0	0	0	0	0	0	0	0	0	0	0	0	p__Bacillariophyta	g__Pinnularia	s__Pinnularia_viridiformis
ASV6993	0	0	0	0	0	0	0	0	0	0	0	0	0	0	0	0	0	0	17	0	0	0	0	0	0	0	0	0	0	0	0	0	0	0	0	0	0	0	0	p__Sarcomastigophora	g__Raperostelium	s__Raperostelium_ohioense
ASV6990	0	0	0	0	0	0	0	0	0	0	0	0	0	0	0	0	0	0	17	0	0	0	0	0	0	0	0	0	0	0	0	0	0	0	0	0	0	0	0	p__Chlorophyta	g__Hafniomonas	s__Hafniomonas_reticulata
ASV6974	0	0	0	0	0	0	0	0	0	17	0	0	0	0	0	0	0	0	0	0	0	0	0	0	0	0	0	0	0	0	0	0	0	0	0	0	0	0	0	p__Chlorophyta	g__Chara	s__Chara_vulgaris
ASV6968	0	0	0	0	0	0	0	0	0	17	0	0	0	0	0	0	0	0	0	0	0	0	0	0	0	0	0	0	0	0	0	0	0	0	0	0	0	0	0	p__Rhodophyta	g__Eucheuma	s__Eucheuma_denticulatum
ASV6967	0	0	0	0	0	0	0	0	0	17	0	0	0	0	0	0	0	0	0	0	0	0	0	0	0	0	0	0	0	0	0	0	0	0	0	0	0	0	0	p__Chrysophyta	g__Cyclonexis	s__Cyclonexis_annularis
ASV6961	0	0	0	0	0	0	0	0	0	0	0	0	0	0	0	0	0	0	0	0	0	0	0	0	0	0	18	0	0	0	0	0	0	0	0	0	0	0	0	p__Sarcomastigophora	g__Cavenderia	s__Cavenderia_granulophora
ASV6955	0	0	0	0	0	0	0	0	0	0	0	0	0	0	0	0	0	0	0	0	0	0	0	18	0	0	0	0	0	0	0	0	0	0	0	0	0	0	0	p__Chlorophyta	g__Wislouchiella	s__Wislouchiella_planctonica
ASV6952	0	0	0	0	0	0	0	0	0	0	0	0	0	0	0	0	0	0	0	0	0	18	0	0	0	0	0	0	0	0	0	0	0	0	0	0	0	0	0	p__Sarcomastigophora	g__Nuclearia	s__Nuclearia_thermophila
ASV6946	0	0	0	0	0	0	0	0	0	0	0	0	0	0	0	0	0	0	0	0	18	0	0	0	0	0	0	0	0	0	0	0	0	0	0	0	0	0	0	p__Euglenophyta	g__Euglena	s__Euglena_agilis
ASV6944	0	0	0	0	0	0	0	0	0	0	0	0	0	0	0	0	0	0	0	0	9	0	9	0	0	0	0	0	0	0	0	0	0	0	0	0	0	0	0	p__Chlorophyta	g__Pumiliosphaera	s__Pumiliosphaera_acidophila
ASV6941	0	0	0	0	0	0	0	0	0	0	0	0	0	0	0	0	0	0	0	0	8	0	0	0	10	0	0	0	0	0	0	0	0	0	0	0	0	0	0	p__Dinophyta	g__Cochlodinium	s__Cochlodinium_polykrikoides
ASV6939	0	0	0	0	0	0	0	0	0	0	0	0	0	0	0	0	0	0	0	18	0	0	0	0	0	0	0	0	0	0	0	0	0	0	0	0	0	0	0	p__Euglenophyta	g__Euglenaria	s__Euglenaria_anabaena
ASV693	0	99	0	0	0	0	0	0	0	0	0	0	0	0	0	0	0	0	0	0	25	0	26	88	0	53	43	69	0	73	92	69	0	33	40	0	104	48	0	p__Chlorophyta	g__Lobomonas	s__Lobomonas_sphaerica
ASV6928	0	0	0	0	0	0	0	0	0	0	0	0	0	0	0	0	0	0	0	0	0	0	0	0	0	0	0	0	0	0	0	0	0	0	0	0	0	10	8	p__Bacillariophyta	g__Planothidium	s__Planothidium_lanceolatum
ASV6926	0	0	0	0	0	0	0	0	0	0	0	0	0	0	0	0	0	0	0	0	0	0	0	0	0	0	0	0	0	0	0	0	0	0	0	0	0	5	13	p__Apicomplexa	g__Gregarina	s__Gregarina_cloptoni
ASV6924	0	0	0	0	0	0	0	0	0	0	0	0	0	0	0	0	0	0	0	0	0	0	0	0	0	0	0	0	0	0	0	0	0	0	0	0	18	0	0	p__Chlorophyta	g__Micractinium	s__Micractinium_pusillum
ASV6923	0	0	0	0	0	0	0	0	0	0	0	0	0	0	0	0	0	0	0	0	0	0	0	0	0	0	0	0	0	0	0	0	0	0	0	0	9	9	0	p__Chlorophyta	g__Carteria	s__Carteria_radiosa
ASV6922	0	0	0	0	0	0	0	0	0	0	0	0	0	0	0	0	0	0	0	0	0	0	0	0	0	0	0	0	0	0	0	0	0	0	0	0	8	10	0	p__Bacillariophyta	g__Thalassiosira	s__Thalassiosira_tenera
ASV692	0	0	0	0	0	95	0	0	0	0	0	0	0	276	0	0	0	0	0	0	31	0	0	70	34	74	55	19	0	0	35	0	0	0	0	0	29	0	144	p__Ciliophora	g__Trithigmostoma	s__Trithigmostoma_steini
ASV6917	0	0	0	0	0	0	0	0	0	0	0	0	0	0	0	0	0	0	0	0	0	0	0	0	0	0	0	0	0	0	0	0	0	0	0	0	18	0	0	p__Ciliophora	g__Platyophrya	s__Platyophrya_vorax
ASV6906	0	0	0	0	0	0	0	0	0	0	0	0	0	0	0	0	0	0	0	0	0	0	0	5	0	4	0	0	0	0	0	0	0	0	4	0	0	0	5	p__Cryptophyta	g__Goniomonas	s__Cryptomonas_ovata
ASV6905	0	0	0	0	0	0	0	0	0	0	0	0	0	0	0	0	0	0	0	0	0	0	0	0	0	0	0	0	0	0	0	0	0	0	18	0	0	0	0	p__Ciliophora	g__Dexiotricha	s__Dexiotricha_granulosa
ASV6904	0	0	0	0	0	0	0	0	0	0	0	0	0	0	0	0	0	0	0	0	0	0	0	0	0	0	8	0	0	0	0	0	0	10	0	0	0	0	0	p__Dinophyta	g__Woloszynskia	s__Woloszynskia_leopoliensis
ASV6900	0	0	0	0	0	0	0	0	0	0	0	0	0	0	0	0	0	0	0	0	0	0	0	0	0	0	0	0	0	0	0	18	0	0	0	0	0	0	0	p__Chlorophyta	g__Pedinomonas	s__Pedinomonas_minor
ASV6895	0	0	0	0	0	0	0	0	0	0	0	0	0	0	0	0	0	0	0	0	0	0	0	0	0	0	0	0	0	0	10	0	0	0	2	0	0	6	0	p__Sarcomastigophora	g__Entamoeba	s__Entamoeba_insolita
ASV6886	0	0	0	0	0	0	0	0	0	0	0	0	0	0	0	0	0	0	0	0	0	0	0	0	0	0	0	0	8	0	0	0	0	0	0	10	0	0	0	p__Phaeophyta	g__Akkesiphycus	s__Akkesiphycus_lubricum
ASV6879	0	0	0	0	0	0	0	0	0	0	0	0	0	0	0	0	0	0	0	0	0	0	0	0	0	0	2	4	0	0	0	0	0	0	0	0	12	0	0	p__Rhodophyta	g__Wildemania	s__Wildemania_amplissima
ASV6871	0	0	0	0	0	0	18	0	0	0	0	0	0	0	0	0	0	0	0	0	0	0	0	0	0	0	0	0	0	0	0	0	0	0	0	0	0	0	0	p__Bacillariophyta	g__Cyclotella	s__Cyclotella_meneghiniana
ASV6860	0	0	0	18	0	0	0	0	0	0	0	0	0	0	0	0	0	0	0	0	0	0	0	0	0	0	0	0	0	0	0	0	0	0	0	0	0	0	0	p__Sarcomastigophora	g__Copromyxa	s__Copromyxa_microcystidis
ASV6853	0	0	0	0	0	0	0	0	0	0	0	0	0	0	0	0	0	0	18	0	0	0	0	0	0	0	0	0	0	0	0	0	0	0	0	0	0	0	0	p__Ciliophora	g__Stichotricha	s__Stichotricha_aculeata
ASV6852	0	0	0	0	0	0	0	0	0	0	0	0	0	0	0	0	0	0	11	0	0	0	0	0	0	0	0	0	0	0	0	0	0	0	0	0	7	0	0	p__Sarcomastigophora	g__Cryptodifflugia	s__Cryptodifflugia_oviformis
ASV6851	0	0	0	0	0	0	0	0	0	0	0	0	0	0	0	0	0	0	18	0	0	0	0	0	0	0	0	0	0	0	0	0	0	0	0	0	0	0	0	p__Ciliophora	g__Bresslaua	s__Bresslaua_vorax
ASV6850	0	0	0	0	0	0	0	0	0	0	0	0	0	0	0	0	0	0	18	0	0	0	0	0	0	0	0	0	0	0	0	0	0	0	0	0	0	0	0	p__Chrysophyta	g__Ochromonas	s__Ochromonas_tuberculata
ASV685	0	0	0	0	0	0	0	0	16	0	0	278	0	0	0	0	0	0	0	0	0	352	2	0	0	0	6	107	0	0	0	0	0	11	4	5	0	57	40	p__Sarcomastigophora	g__Raperostelium	s__Raperostelium_ohioense
ASV6838	0	0	0	0	0	0	0	0	0	0	0	0	0	0	0	18	0	0	0	0	0	0	0	0	0	0	0	0	0	0	0	0	0	0	0	0	0	0	0	p__Sarcomastigophora	g__Neobodo	s__Neobodo_designis
ASV6835	0	0	0	0	0	0	0	0	0	18	0	0	0	0	0	0	0	0	0	0	0	0	0	0	0	0	0	0	0	0	0	0	0	0	0	0	0	0	0	p__Sarcomastigophora	g__Filamoeba	s__Filamoeba_nolandi
ASV6822	0	0	0	0	0	0	0	0	0	18	0	0	0	0	0	0	0	0	0	0	0	0	0	0	0	0	0	0	0	0	0	0	0	0	0	0	0	0	0	p__Chrysophyta	g__Mallomonas	s__Mallomonas_annulata
ASV6812	0	0	0	0	0	0	0	0	0	0	0	0	0	0	0	0	0	0	0	0	0	0	0	0	19	0	0	0	0	0	0	0	0	0	0	0	0	0	0	p__Rotifera	g__Rotaria	s__Rotaria_sordida
ASV6807	0	0	0	0	0	0	0	0	0	0	0	0	0	0	0	0	0	0	0	0	0	0	19	0	0	0	0	0	0	0	0	0	0	0	0	0	0	0	0	p__Ciliophora	g__Obertrumia	s__Obertrumia_georgiana
ASV6801	0	0	0	0	0	0	0	0	0	0	0	0	0	0	0	0	0	0	0	0	19	0	0	0	0	0	0	0	0	0	0	0	0	0	0	0	0	0	0	p__Sarcomastigophora	g__Angulamoeba	s__Angulamoeba_microcystivorans
ASV6796	0	0	0	0	0	0	0	0	0	0	0	0	0	0	0	0	0	0	0	19	0	0	0	0	0	0	0	0	0	0	0	0	0	0	0	0	0	0	0	p__Rotifera	g__Testudinella	s__Testudinella_patina
ASV679	0	0	0	0	0	0	0	0	0	0	0	0	0	0	0	0	0	0	0	0	160	0	290	271	61	0	105	0	0	0	0	0	0	0	0	0	0	0	0	p__Chlorophyta	g__Hafniomonas	s__Hafniomonas_reticulata
ASV6787	0	0	0	0	0	0	0	0	0	0	0	0	0	0	0	0	0	0	0	0	0	0	0	0	0	0	0	0	0	0	0	0	0	0	0	0	0	19	0	p__Euglenophyta	g__Trachelomonas	s__Trachelomonas_similis
ASV6764	0	0	0	0	0	0	0	0	0	0	0	0	0	0	0	0	0	0	0	0	0	0	0	0	0	0	0	0	0	0	0	0	0	0	19	0	0	0	0	p__Apicomplexa	g__Gregarina	s__Gregarina_chortiocetes
ASV6763	0	0	0	0	0	0	0	0	0	0	0	0	0	0	0	0	0	0	0	0	0	0	0	0	0	0	0	0	0	0	0	0	0	19	0	0	0	0	0	p__Ciliophora	g__Spathidium	s__Spathidium_foissneri
ASV6762	0	0	0	0	0	0	0	0	0	0	0	0	0	0	0	0	0	0	0	0	0	0	0	0	0	0	0	0	0	0	0	0	0	19	0	0	0	0	0	p__Chlorophyta	g__Chlorella	s__Chlorella_variabilis
ASV6760	0	0	0	0	0	0	0	0	0	0	0	0	0	0	0	0	0	0	0	0	0	0	0	0	0	4	0	0	0	0	0	0	0	9	0	0	0	0	6	p__Chlorophyta	g__Neochlorosarcina	s__Neochlorosarcina_minor
ASV6759	0	0	0	0	0	0	0	0	0	0	0	0	0	0	0	0	0	0	0	0	0	0	0	0	0	0	0	0	0	0	0	10	0	9	0	0	0	0	0	p__Euglenophyta	g__Lepocinclis	s__Lepocinclis_playfairiana
ASV6750	0	0	0	0	0	0	0	0	0	0	0	0	0	0	0	0	0	0	0	0	0	0	0	0	0	0	0	0	0	0	19	0	0	0	0	0	0	0	0	p__Ciliophora	g__Apofrontonia	s__Apofrontonia_dohrni
ASV675	0	0	0	0	0	0	0	0	0	0	0	0	0	0	0	0	0	0	0	0	0	7	10	31	27	97	157	423	115	6	0	0	0	19	0	0	0	0	0	p__Bacillariophyta	g__Nitzschia	s__Nitzschia_amphibia
ASV6742	0	0	0	0	0	0	0	0	0	0	0	0	0	0	0	0	0	0	0	0	0	0	0	0	8	0	0	11	0	0	0	0	0	0	0	0	0	0	0	p__Ciliophora	g__Placus	s__Placus_salinus
ASV674	0	0	0	0	0	0	0	0	0	0	0	0	0	0	0	0	0	0	0	0	16	0	0	66	33	110	170	5	0	0	0	0	0	0	494	0	0	0	0	p__Chlorophyta	g__Nautococcus	s__Nautococcus_solutus
ASV6730	0	0	0	0	0	0	0	19	0	0	0	0	0	0	0	0	0	0	0	0	0	0	0	0	0	0	0	0	0	0	0	0	0	0	0	0	0	0	0	p__Ciliophora	g__Prorodon	s__Prorodon_teres
ASV6729	0	0	0	0	0	0	19	0	0	0	0	0	0	0	0	0	0	0	0	0	0	0	0	0	0	0	0	0	0	0	0	0	0	0	0	0	0	0	0	p__Chlorophyta	g__Catena	s__Catena_viridis
ASV6728	0	0	0	0	0	0	19	0	0	0	0	0	0	0	0	0	0	0	0	0	0	0	0	0	0	0	0	0	0	0	0	0	0	0	0	0	0	0	0	p__Ciliophora	g__Phascolodon	s__Phascolodon_vorticella
ASV6727	0	0	0	0	0	0	19	0	0	0	0	0	0	0	0	0	0	0	0	0	0	0	0	0	0	0	0	0	0	0	0	0	0	0	0	0	0	0	0	p__Bacillariophyta	g__Diatoma	s__Diatoma_tenuis
ASV6725	0	0	0	0	0	0	6	0	0	0	0	0	0	0	0	0	0	0	0	0	3	0	0	3	0	0	0	0	0	0	0	0	0	0	0	0	7	0	0	p__Sarcomastigophora	g__Chaos	s__Chaos_carolinense
ASV6722	0	0	0	0	0	0	19	0	0	0	0	0	0	0	0	0	0	0	0	0	0	0	0	0	0	0	0	0	0	0	0	0	0	0	0	0	0	0	0	p__Sarcomastigophora	g__Parvamoeba	s__Parvamoeba_rugata
ASV6714	19	0	0	0	0	0	0	0	0	0	0	0	0	0	0	0	0	0	0	0	0	0	0	0	0	0	0	0	0	0	0	0	0	0	0	0	0	0	0	p__Chlorophyta	g__Nephrochlamys	s__Nephrochlamys_subsolitaria
ASV6713	19	0	0	0	0	0	0	0	0	0	0	0	0	0	0	0	0	0	0	0	0	0	0	0	0	0	0	0	0	0	0	0	0	0	0	0	0	0	0	p__Sarcomastigophora	g__Salpingoeca	s__Salpingoeca_urceolata
ASV6712	0	0	0	0	0	0	0	0	0	0	0	0	0	0	0	0	0	0	19	0	0	0	0	0	0	0	0	0	0	0	0	0	0	0	0	0	0	0	0	p__Bacillariophyta	g__Navicula	s__Navicula_cryptocephala
ASV6698	0	0	0	0	0	0	0	0	0	19	0	0	0	0	0	0	0	0	0	0	0	0	0	0	0	0	0	0	0	0	0	0	0	0	0	0	0	0	0	p__Sarcomastigophora	g__Angulamoeba	s__Angulamoeba_microcystivorans
ASV6695	0	0	0	0	0	0	0	0	0	19	0	0	0	0	0	0	0	0	0	0	0	0	0	0	0	0	0	0	0	0	0	0	0	0	0	0	0	0	0	p__Chlorophyta	g__Chlamydomonas	s__Chlamydomonas_reinhardtii
ASV6682	0	0	0	0	0	0	0	0	0	0	0	0	0	0	0	0	0	0	0	0	0	0	0	0	0	0	20	0	0	0	0	0	0	0	0	0	0	0	0	p__Ciliophora	g__Tintinnopsis	s__Tintinnopsis_lacustris
ASV6675	0	0	0	0	0	0	0	0	0	0	0	0	0	0	0	0	0	0	0	0	0	0	0	4	0	9	7	0	0	0	0	0	0	0	0	0	0	0	0	p__Sarcomastigophora	g__Parabodo	s__Parabodo_caudatus
ASV6674	0	0	0	0	0	0	0	0	0	0	0	0	0	0	0	0	0	0	0	0	0	0	0	20	0	0	0	0	0	0	0	0	0	0	0	0	0	0	0	p__Chlorophyta	g__Heterochlamydomonas	s__Heterochlamydomonas_inaequalis
ASV6671	0	0	0	0	0	0	0	0	0	0	0	0	0	0	0	0	0	0	0	0	20	0	0	0	0	0	0	0	0	0	0	0	0	0	0	0	0	0	0	p__Bacillariophyta	g__Cyclotella	s__Cyclotella_meneghiniana
ASV665	0	0	0	0	54	0	30	53	0	710	0	0	0	0	0	0	0	0	0	0	0	0	46	10	0	0	0	12	0	0	4	0	0	0	0	0	0	0	0	p__Ciliophora	g__Metopus	s__Metopus_es
ASV6649	0	0	0	0	0	0	0	0	0	0	0	0	0	0	0	0	0	0	0	0	0	0	0	0	0	0	0	0	0	0	0	0	0	0	0	0	4	0	16	p__Sarcomastigophora	g__Raperostelium	s__Raperostelium_ohioense
ASV6648	0	0	0	0	0	0	0	0	0	0	0	0	0	0	0	0	0	0	0	0	0	0	0	0	0	0	0	0	0	0	0	0	0	0	0	0	20	0	0	p__Ciliophora	g__Protocyclidium	s__Protocyclidium_citrullus
ASV6615	0	0	0	0	0	0	0	0	0	0	0	0	0	0	0	0	0	0	0	0	0	0	0	11	0	0	0	0	9	0	0	0	0	0	0	0	0	0	0	p__Euglenophyta	g__Euglena	s__Euglena_tristella
ASV6609	0	0	0	0	0	0	0	0	0	0	0	0	0	0	0	0	0	0	0	0	0	0	0	0	0	0	0	20	0	0	0	0	0	0	0	0	0	0	0	p__Chlorophyta	g__Compactochlorella	s__Compactochlorella_kochii
ASV6607	0	0	0	0	0	0	0	0	0	0	0	0	0	0	0	0	0	0	0	0	0	0	0	0	0	0	0	11	0	0	0	0	0	0	0	0	0	9	0	p__Ciliophora	g__Anteholosticha	s__Anteholosticha_monilata
ASV6604	0	0	0	0	0	0	0	20	0	0	0	0	0	0	0	0	0	0	0	0	0	0	0	0	0	0	0	0	0	0	0	0	0	0	0	0	0	0	0	p__Chlorophyta	g__Chloromonas	s__Chloromonas_insignis
ASV66	0	0	0	0	0	0	57	0	0	70	558	0	0	0	0	0	225	0	57	0	78	0	42	147	146	174	132	209	53	68	395	146	0	14	505	174	5760	432	43	p__Chlorophyta	g__Chlamydopodium	s__Chlamydopodium_vacuolatum
ASV6593	20	0	0	0	0	0	0	0	0	0	0	0	0	0	0	0	0	0	0	0	0	0	0	0	0	0	0	0	0	0	0	0	0	0	0	0	0	0	0	p__Bacillariophyta	g__Skeletonema	s__Skeletonema_grevillei
ASV6591	0	0	0	0	0	0	0	0	0	0	0	0	0	0	0	0	0	0	20	0	0	0	0	0	0	0	0	0	0	0	0	0	0	0	0	0	0	0	0	p__Chlorophyta	g__Pandorina	s__Pandorina_morum
ASV6584	0	0	0	0	0	0	0	0	0	0	0	0	0	0	0	0	0	0	20	0	0	0	0	0	0	0	0	0	0	0	0	0	0	0	0	0	0	0	0	p__Sarcomastigophora	g__Schizoplasmodium	s__Schizoplasmodium_cavostelioides
ASV6583	0	0	0	0	0	0	0	0	0	0	0	0	0	0	0	0	0	0	20	0	0	0	0	0	0	0	0	0	0	0	0	0	0	0	0	0	0	0	0	p__Chlorophyta	g__Heveochlorella	s__Heveochlorella_hainangensis
ASV6582	0	0	0	0	0	0	0	0	0	0	0	0	0	0	0	0	0	0	20	0	0	0	0	0	0	0	0	0	0	0	0	0	0	0	0	0	0	0	0	p__Ciliophora	g__Loxophyllum	s__Loxophyllum_perihoplophorum
ASV6577	0	0	0	0	0	0	0	0	0	0	0	0	0	0	0	20	0	0	0	0	0	0	0	0	0	0	0	0	0	0	0	0	0	0	0	0	0	0	0	p__Chlorophyta	g__Characiochloris	s__Characiochloris_sasae
ASV6570	0	0	0	0	0	0	0	0	0	13	0	0	0	0	0	0	0	0	0	0	7	0	0	0	0	0	0	0	0	0	0	0	0	0	0	0	0	0	0	p__Haptophyta	g__Pavlova	s__Pavlova_granifera
ASV6568	0	0	0	0	0	0	0	0	0	20	0	0	0	0	0	0	0	0	0	0	0	0	0	0	0	0	0	0	0	0	0	0	0	0	0	0	0	0	0	p__Bacillariophyta	g__Craticula	s__Craticula_molestiformis
ASV6566	0	0	0	0	0	0	0	0	0	15	0	0	0	0	0	0	0	0	0	0	0	0	0	0	0	0	0	0	0	0	0	0	0	0	0	0	0	5	0	p__Dinophyta	g__Woloszynskia	s__Woloszynskia_pascheri
ASV6551	0	0	0	0	0	0	0	0	0	0	0	0	0	0	0	0	0	0	0	0	0	0	0	0	8	0	13	0	0	0	0	0	0	0	0	0	0	0	0	p__Ciliophora	g__Tetrahymena	s__Tetrahymena_paravorax
ASV6549	0	0	0	0	0	0	0	0	0	0	0	0	0	0	0	0	0	0	0	0	0	0	0	21	0	0	0	0	0	0	0	0	0	0	0	0	0	0	0	p__Sarcomastigophora	g__Rhynchomonas	s__Rhynchomonas_nasuta
ASV6542	0	0	0	0	0	0	0	0	0	0	0	0	0	0	0	0	0	0	0	0	21	0	0	0	0	0	0	0	0	0	0	0	0	0	0	0	0	0	0	p__Ciliophora	g__Colpoda	s__Colpoda_maupasi
ASV6530	0	0	0	0	0	0	0	0	0	0	0	0	0	0	0	0	0	0	0	0	0	0	0	0	0	0	0	0	0	0	0	0	0	0	0	0	0	0	21	p__Apicomplexa	g__Gregarina	s__Gregarina_cuneata
ASV6529	0	0	0	0	0	0	0	0	0	0	0	0	0	0	0	0	0	0	0	0	0	0	0	0	0	0	0	0	0	0	0	0	0	0	0	0	0	0	21	p__Chrysophyta	g__Chromulina	s__Chromulina_chionophila
ASV6527	0	0	0	0	0	0	0	0	0	0	0	0	0	0	0	0	0	0	0	0	0	0	0	0	0	0	0	0	0	0	0	0	0	0	0	0	0	0	21	p__Sarcomastigophora	g__Salpingoeca	s__Salpingoeca_fusiformis
ASV6525	0	0	0	0	0	0	0	0	0	0	0	0	0	0	0	0	0	0	0	0	3	0	0	0	0	9	0	0	0	0	0	0	0	0	0	0	0	9	0	p__Chlorophyta	g__Dolichomastix	s__Dolichomastix_tenuilepis
ASV6523	0	0	0	0	0	0	0	0	0	0	0	0	0	0	0	0	0	0	0	0	0	0	0	0	0	0	0	0	0	0	0	0	0	0	0	0	0	21	0	p__Sarcomastigophora	g__Bodo	s__Bodo_saltans
ASV6521	0	0	0	0	0	0	0	0	0	0	0	0	0	0	0	0	0	0	0	0	0	0	0	0	0	0	0	0	0	0	0	0	0	0	0	0	5	0	16	p__Chrysophyta	g__Paraphysomonas	s__Paraphysomonas_foraminifera
ASV6510	0	0	0	0	0	0	0	0	0	0	0	0	0	0	0	0	0	0	0	0	0	0	0	0	0	0	0	0	0	0	0	0	0	0	0	0	16	5	0	p__Euglenophyta	g__Phacus	s__Phacus_orbicularis
ASV6509	0	0	0	0	0	0	0	0	0	0	0	0	0	0	0	0	0	0	0	0	7	0	0	0	0	0	0	0	0	0	0	0	0	0	0	0	14	0	0	p__Ciliophora	g__Stichotricha	s__Stichotricha_aculeata
ASV6502	0	0	0	0	0	0	0	0	0	0	0	0	0	0	0	0	0	0	0	0	0	0	0	0	0	0	0	0	0	0	0	0	0	0	21	0	0	0	0	p__Ciliophora	g__Furgasonia	s__Furgasonia_blochmanni
ASV6497	0	0	0	0	0	0	0	0	0	0	0	0	0	0	0	0	0	0	0	0	0	0	0	0	0	0	0	0	0	0	21	0	0	0	0	0	0	0	0	p__Bacillariophyta	g__Thalassiosira	s__Thalassiosira_rotula
ASV6496	0	0	0	0	0	0	0	0	0	0	0	0	0	0	0	0	0	0	0	0	0	0	0	0	0	0	0	0	0	0	21	0	0	0	0	0	0	0	0	p__Ciliophora	g__Phascolodon	s__Phascolodon_vorticella
ASV6492	0	0	0	0	0	0	0	0	0	0	0	0	0	0	0	0	0	0	0	0	0	0	0	0	0	0	0	0	0	0	21	0	0	0	0	0	0	0	0	p__Chlorophyta	g__Chlorochytrium	s__Chlorochytrium_lemnae
ASV6487	0	0	0	0	0	0	0	0	0	0	0	0	0	0	0	0	0	0	0	0	0	0	0	0	0	0	0	9	0	0	0	0	0	0	0	0	0	12	0	p__Bacillariophyta	g__Thalassiosira	s__Thalassiosira_hendeyi
ASV6482	0	0	0	0	0	0	0	21	0	0	0	0	0	0	0	0	0	0	0	0	0	0	0	0	0	0	0	0	0	0	0	0	0	0	0	0	0	0	0	p__Sarcomastigophora	g__Vannella	s__Vannella_miroides
ASV648	0	72	0	0	0	0	0	0	0	170	0	0	701	0	0	0	0	0	0	0	0	0	0	0	0	0	0	0	0	0	0	0	0	0	0	0	0	0	0	p__Bacillariophyta	g__Cyclotella	s__Cyclotella_meneghiniana
ASV6478	0	0	0	0	0	0	21	0	0	0	0	0	0	0	0	0	0	0	0	0	0	0	0	0	0	0	0	0	0	0	0	0	0	0	0	0	0	0	0	p__Sarcomastigophora	g__Stygamoeba	s__Stygamoeba_regulata
ASV6477	0	0	0	0	0	0	21	0	0	0	0	0	0	0	0	0	0	0	0	0	0	0	0	0	0	0	0	0	0	0	0	0	0	0	0	0	0	0	0	p__Euglenophyta	g__Rhabdomonas	s__Rhabdomonas_incurva
ASV645	0	507	0	0	0	0	0	32	0	0	0	0	0	0	0	0	0	0	0	0	0	0	0	0	0	0	0	0	0	90	49	0	0	114	13	13	0	13	117	p__Rotifera	g__Keratella	s__Keratella_quadrata
ASV6445	0	0	0	0	0	0	0	0	21	0	0	0	0	0	0	0	0	0	0	0	0	0	0	0	0	0	0	0	0	0	0	0	0	0	0	0	0	0	0	p__Cryptophyta	g__Goniomonas	s__Cryptomonas_curvata
ASV6442	0	0	0	0	0	0	0	0	0	0	0	0	0	0	0	0	0	0	0	0	0	0	0	0	0	11	11	0	0	0	0	0	0	0	0	0	0	0	0	p__Chlorophyta	g__Chlamydomonas	s__Chlamydomonas_acidophila
ASV6440	0	0	0	0	0	0	0	0	0	0	0	0	0	0	0	0	0	0	0	0	0	0	0	0	22	0	0	0	0	0	0	0	0	0	0	0	0	0	0	p__Ciliophora	g__Urosoma	s__Urosoma_salmastra
ASV6437	0	0	0	0	0	0	0	0	0	0	0	0	0	0	0	0	0	0	0	0	0	0	0	22	0	0	0	0	0	0	0	0	0	0	0	0	0	0	0	p__Ciliophora	g__Metopus	s__Metopus_fuscus
ASV6434	0	0	0	0	0	0	0	0	0	0	0	0	0	0	0	0	0	0	0	0	0	22	0	0	0	0	0	0	0	0	0	0	0	0	0	0	0	0	0	p__Chlorophyta	g__Chlamydomonas	s__Chlamydomonas_reinhardtii
ASV643	0	0	0	0	0	88	0	0	0	0	0	0	0	0	0	0	0	0	0	0	0	0	0	0	128	0	270	0	0	53	249	57	0	0	0	0	0	114	0	p__Rotifera	g__Cephalodella	s__Cephalodella_gibba
ASV6429	0	0	0	0	0	0	0	0	0	0	0	0	0	0	0	0	0	0	0	0	15	0	0	7	0	0	0	0	0	0	0	0	0	0	0	0	0	0	0	p__Ciliophora	g__Leprotintinnus	s__Leprotintinnus_nordqvisti
ASV6423	0	0	0	0	0	0	0	0	0	0	0	0	0	0	0	0	0	0	0	0	0	0	0	0	0	0	0	0	0	0	0	0	0	0	0	0	0	0	22	p__Cryptophyta	g__Goniomonas	s__Cryptomonas_pyrenoidifera
ASV642	0	0	0	0	0	0	0	0	0	0	0	0	0	0	0	0	0	0	0	839	41	62	0	0	0	0	0	0	0	0	0	0	0	0	0	0	0	18	0	p__Chlorophyta	g__Pedinomonas	s__Pedinomonas_minor
ASV6418	0	0	0	0	0	0	0	0	0	0	0	0	0	0	0	0	0	0	0	0	0	0	0	0	0	0	0	0	0	0	0	0	0	0	0	0	0	0	22	p__Sarcomastigophora	g__Endostelium	s__Endostelium_crystalliferum
ASV6405	0	0	0	0	0	0	0	0	0	0	0	0	0	0	0	0	0	0	0	0	0	0	0	0	0	0	0	0	0	0	0	0	0	0	0	0	22	0	0	p__Chlorophyta	g__Uronema	s__Uronema_acuminatum
ASV6404	0	0	0	0	0	0	0	0	0	0	0	0	0	0	0	0	0	0	0	0	0	0	0	0	0	0	0	0	0	0	0	0	0	0	0	12	0	0	10	p__Chrysophyta	g__Chromulina	s__Chromulina_chionophila
ASV64	0	0	0	0	0	9584	0	0	0	0	0	0	0	0	0	0	0	0	0	0	0	0	0	0	0	0	0	0	0	0	0	0	0	0	0	0	0	0	0	p__Ciliophora	g__Onychodromopsis	s__Onychodromopsis_flexilis
ASV6398	0	0	0	0	0	0	0	0	0	0	0	0	0	0	0	0	0	0	0	0	0	0	0	0	0	0	0	0	0	0	0	0	0	0	10	0	0	0	12	p__Apicomplexa	g__Leidyana	s__Leidyana_migrator
ASV6397	0	0	0	0	0	0	0	0	0	0	0	0	0	0	0	0	0	0	0	0	0	0	0	0	0	0	0	0	0	0	0	0	3	19	0	0	0	0	0	p__Ciliophora	g__Chilodochona	s__Chilodochona_carcini
ASV6395	0	0	0	0	0	0	0	0	0	0	0	0	0	0	0	0	0	0	0	0	0	16	0	0	0	0	0	0	0	0	0	4	0	2	0	0	0	0	0	p__Sarcomastigophora	g__Paramoeba	s__Paramoeba_atlantica
ASV639	0	0	0	0	0	0	0	0	0	0	0	0	0	0	0	0	0	0	0	0	0	0	0	0	0	0	0	0	0	0	0	0	0	0	0	0	58	9	900	p__Xanthophyta	g__Haramonas	s__Haramonas_pauciplastida
ASV6389	0	0	0	0	0	0	0	0	0	0	0	0	0	0	0	0	0	0	0	0	7	0	0	0	0	0	0	0	0	0	9	0	0	0	0	0	0	0	6	p__Euglenophyta	g__Euglenaria	s__Euglenaria_clavata
ASV6388	0	0	0	0	0	0	0	0	0	0	0	0	0	0	0	0	0	0	0	0	0	0	0	0	0	0	0	0	0	0	22	0	0	0	0	0	0	0	0	p__Euglenophyta	g__Phacus	s__Phacus_oscillans
ASV6378	0	0	0	0	0	0	0	0	0	0	0	0	0	0	0	0	0	0	0	0	0	0	0	0	0	0	0	22	0	0	0	0	0	0	0	0	0	0	0	p__Chlorophyta	g__Tetracystis	s__Tetracystis_pampae
ASV6372	0	0	0	0	0	0	0	22	0	0	0	0	0	0	0	0	0	0	0	0	0	0	0	0	0	0	0	0	0	0	0	0	0	0	0	0	0	0	0	p__Apicomplexa	g__Gregarina	s__Gregarina_cloptoni
ASV637	0	0	0	98	0	0	0	0	0	0	0	0	0	0	0	0	0	0	0	0	53	0	45	73	80	137	69	57	0	275	0	0	0	0	35	0	0	0	53	p__Rotifera	g__Cephalodella	s__Cephalodella_forficula
ASV6368	0	0	0	0	0	0	0	22	0	0	0	0	0	0	0	0	0	0	0	0	0	0	0	0	0	0	0	0	0	0	0	0	0	0	0	0	0	0	0	p__Sarcomastigophora	g__Cryptodifflugia	s__Cryptodifflugia_oviformis
ASV6365	0	0	0	0	0	0	0	22	0	0	0	0	0	0	0	0	0	0	0	0	0	0	0	0	0	0	0	0	0	0	0	0	0	0	0	0	0	0	0	p__Arthropoda	g__Anomalocera	s__Anomalocera_patersoni
ASV6361	0	0	0	0	0	0	15	0	0	0	0	0	0	0	0	0	0	0	0	0	0	0	0	0	0	0	0	7	0	0	0	0	0	0	0	0	0	0	0	p__Chlorophyta	g__Choricystis	s__Choricystis_parasitica
ASV636	0	80	0	0	0	0	0	0	0	0	198	0	326	176	0	0	0	0	0	0	0	0	0	10	0	0	0	0	0	13	82	22	0	0	0	0	19	16	36	p__Bacillariophyta	g__Fistulifera	s__Fistulifera_pelliculosa
ASV6359	0	0	0	0	0	0	22	0	0	0	0	0	0	0	0	0	0	0	0	0	0	0	0	0	0	0	0	0	0	0	0	0	0	0	0	0	0	0	0	p__Phaeophyta	g__Saccharina	s__Saccharina_japonica
ASV6358	0	0	0	0	0	22	0	0	0	0	0	0	0	0	0	0	0	0	0	0	0	0	0	0	0	0	0	0	0	0	0	0	0	0	0	0	0	0	0	p__Dinophyta	g__Nusuttodinium	s__Nusuttodinium_acidotum
ASV6356	0	0	22	0	0	0	0	0	0	0	0	0	0	0	0	0	0	0	0	0	0	0	0	0	0	0	0	0	0	0	0	0	0	0	0	0	0	0	0	p__Euglenophyta	g__Phacus	s__Phacus_pleuronectes
ASV6353	22	0	0	0	0	0	0	0	0	0	0	0	0	0	0	0	0	0	0	0	0	0	0	0	0	0	0	0	0	0	0	0	0	0	0	0	0	0	0	p__Chlorophyta	g__Chlorella	s__Chlorella_stigmatophora
ASV635	0	0	0	0	0	0	45	0	0	23	0	0	0	0	32	38	0	0	0	0	26	21	0	0	18	16	20	0	0	0	0	0	0	0	13	727	0	0	0	p__Chrysophyta	g__Ochromonas	s__Ochromonas_danica
ASV6339	0	0	0	0	0	0	0	0	0	22	0	0	0	0	0	0	0	0	0	0	0	0	0	0	0	0	0	0	0	0	0	0	0	0	0	0	0	0	0	p__Chrysophyta	g__Epipyxis	s__Epipyxis_aureus
ASV6335	0	0	0	0	0	0	0	0	0	22	0	0	0	0	0	0	0	0	0	0	0	0	0	0	0	0	0	0	0	0	0	0	0	0	0	0	0	0	0	p__Chlorophyta	g__Carteria	s__Carteria_lunzensis
ASV6324	0	0	0	0	0	0	0	0	0	0	0	0	0	0	0	0	0	0	0	0	0	0	10	13	0	0	0	0	0	0	0	0	0	0	0	0	0	0	0	p__Sarcomastigophora	g__Parabodo	s__Parabodo_caudatus
ASV6323	0	0	0	0	0	0	0	0	0	0	0	0	0	0	0	0	0	0	0	0	0	23	0	0	0	0	0	0	0	0	0	0	0	0	0	0	0	0	0	p__Euglenophyta	g__Euglena	s__Euglena_agilis
ASV6322	0	0	0	0	0	0	0	0	0	0	0	0	0	0	0	0	0	0	0	0	0	23	0	0	0	0	0	0	0	0	0	0	0	0	0	0	0	0	0	p__Ciliophora	g__Metopus	s__Metopus_hasei
ASV6321	0	0	0	0	0	0	0	0	0	0	0	0	0	0	0	0	0	0	0	0	0	23	0	0	0	0	0	0	0	0	0	0	0	0	0	0	0	0	0	p__Apicomplexa	g__Gregarina	s__Gregarina_ormierei
ASV632	0	0	0	100	139	0	0	0	66	0	0	0	0	0	0	0	259	0	0	20	47	0	21	39	66	29	71	7	27	26	14	22	0	0	0	31	0	0	0	p__Apicomplexa	g__Dactylosoma	s__Dactylosoma_ranarum
ASV6310	0	0	0	0	0	0	0	0	0	0	0	0	0	0	0	0	0	0	0	0	0	0	0	0	0	0	0	0	0	0	0	0	0	0	0	0	0	0	23	p__Sarcomastigophora	g__Neobodo	s__Neobodo_designis
ASV6309	0	0	0	0	0	0	0	0	0	0	0	0	0	0	0	0	0	0	0	0	0	0	0	0	0	12	0	0	0	0	0	0	0	0	0	0	0	0	11	p__Euglenophyta	g__Cyclidiopsis	s__Cyclidiopsis_acus
ASV6307	0	0	0	0	0	0	0	0	0	0	0	0	0	0	0	0	0	0	0	0	0	0	0	0	0	0	0	0	0	0	0	0	0	0	0	0	0	0	23	p__Chlorophyta	g__Coccomyxa	s__Coccomyxa_simplex
ASV6303	0	0	0	0	0	0	0	0	0	0	0	0	0	0	0	0	0	0	0	0	0	0	0	0	0	0	0	0	0	0	0	0	0	0	0	0	0	0	23	p__Apicomplexa	g__Gregarina	s__Gregarina_cloptoni
ASV6300	0	0	0	0	0	0	0	0	0	0	0	0	0	0	0	0	0	0	0	0	0	0	0	0	0	0	0	0	0	0	0	0	0	0	0	0	0	23	0	p__Bacillariophyta	g__Thalassiosira	s__Thalassiosira_tenera
ASV63	0	0	0	0	0	0	0	0	0	0	0	0	0	0	0	0	0	0	0	0	113	0	1893	4854	429	456	641	838	200	44	64	45	48	377	0	0	90	43	4	p__Xanthophyta	g__Gonyostomum	s__Gonyostomum_semen
ASV6296	0	0	0	0	0	0	0	0	0	0	0	0	0	0	0	0	0	0	0	0	0	0	0	0	0	0	0	0	0	0	0	0	0	0	0	0	23	0	0	p__Cryptophyta	g__Goniomonas	s__Cryptomonas_marssonii
ASV6290	0	0	0	0	0	0	0	0	0	0	0	0	0	0	0	0	0	0	0	0	0	0	0	0	0	17	3	0	0	0	0	0	0	0	3	0	0	0	0	p__Ciliophora	g__Hypocoma	s__Hypocoma_acinetarum
ASV6283	0	0	0	0	0	0	0	0	0	0	0	0	0	0	0	0	0	0	0	0	0	0	0	0	0	0	0	0	0	0	23	0	0	0	0	0	0	0	0	p__Bacillariophyta	g__Ulnaria	s__Ulnaria_delicatissima
ASV6282	0	0	0	0	0	0	0	0	0	0	0	0	0	0	0	0	0	0	0	0	0	0	0	0	0	0	0	0	0	0	23	0	0	0	0	0	0	0	0	p__Ciliophora	g__Agolohymena	s__Agolohymena_aspidocauda
ASV6281	0	0	0	0	0	0	0	0	0	0	0	0	0	0	0	0	0	0	0	0	0	0	0	0	0	5	0	0	0	0	18	0	0	0	0	0	0	0	0	p__Chlorophyta	g__Nautococcus	s__Nautococcus_solutus
ASV6280	0	0	0	0	0	0	0	0	0	0	0	0	0	0	0	0	0	0	0	0	0	0	0	0	0	0	0	0	0	0	23	0	0	0	0	0	0	0	0	p__Chlorophyta	g__Radiococcus	s__Radiococcus_polycoccus
ASV6273	0	0	0	0	0	0	0	0	0	0	0	0	0	0	0	0	0	0	0	0	0	0	0	0	0	7	0	0	0	12	0	4	0	0	0	0	0	0	0	p__Phaeophyta	g__Saccharina	s__Saccharina_japonica
ASV627	0	0	0	0	0	0	27	0	0	0	620	0	0	0	0	0	0	0	0	46	38	8	56	89	0	29	35	0	0	0	0	0	0	0	45	0	0	0	0	p__Ciliophora	g__Meseres	s__Meseres_corlissi
ASV6268	0	0	0	0	0	0	0	0	0	0	0	0	0	0	0	0	0	0	0	0	0	0	0	0	0	0	0	6	0	0	0	0	17	0	0	0	0	0	0	p__Cryptophyta	g__Plagioselmis	s__Plagioselmis_nannoplanctica
ASV6266	0	0	0	0	0	0	0	0	0	0	0	0	0	0	0	0	0	0	0	0	9	0	0	0	0	0	0	10	0	0	0	0	0	4	0	0	0	0	0	p__Euglenophyta	g__Cryptoglena	s__Cryptoglena_skujai
ASV6261	0	0	0	0	0	0	16	0	0	0	0	0	0	0	0	0	0	0	0	0	0	0	0	0	0	0	0	0	0	0	7	0	0	0	0	0	0	0	0	p__Phaeophyta	g__Saccharina	s__Saccharina_japonica
ASV6260	0	0	0	0	0	0	23	0	0	0	0	0	0	0	0	0	0	0	0	0	0	0	0	0	0	0	0	0	0	0	0	0	0	0	0	0	0	0	0	p__Sarcomastigophora	g__Neobodo	s__Neobodo_designis
ASV6257	0	0	0	0	0	0	13	0	0	0	0	0	0	0	0	0	0	0	0	0	0	0	0	0	0	0	0	0	0	0	0	0	0	0	0	0	10	0	0	p__Sarcomastigophora	g__Klosteria	s__Klosteria_bodomorphis
ASV6256	0	0	0	0	0	0	23	0	0	0	0	0	0	0	0	0	0	0	0	0	0	0	0	0	0	0	0	0	0	0	0	0	0	0	0	0	0	0	0	p__Dinophyta	g__Nusuttodinium	s__Nusuttodinium_acidotum
ASV6250	0	0	0	0	0	23	0	0	0	0	0	0	0	0	0	0	0	0	0	0	0	0	0	0	0	0	0	0	0	0	0	0	0	0	0	0	0	0	0	p__Sarcomastigophora	g__Dictyostelium	s__Dictyostelium_robustum
ASV6247	0	0	0	23	0	0	0	0	0	0	0	0	0	0	0	0	0	0	0	0	0	0	0	0	0	0	0	0	0	0	0	0	0	0	0	0	0	0	0	p__Bacillariophyta	g__Conticribra	s__Conticribra_weissflogiopsis
ASV6244	0	23	0	0	0	0	0	0	0	0	0	0	0	0	0	0	0	0	0	0	0	0	0	0	0	0	0	0	0	0	0	0	0	0	0	0	0	0	0	p__Arthropoda	g__Eucyclops	s__Eucyclops_speratus
ASV6239	0	0	0	0	0	0	0	0	0	0	0	0	0	0	0	0	0	0	23	0	0	0	0	0	0	0	0	0	0	0	0	0	0	0	0	0	0	0	0	p__Chrysophyta	g__Pedospumella	s__Pedospumella_encystans
ASV6229	0	0	0	0	0	0	0	0	0	0	0	0	0	0	0	23	0	0	0	0	0	0	0	0	0	0	0	0	0	0	0	0	0	0	0	0	0	0	0	p__Chlorophyta	g__Desmodesmus	s__Desmodesmus_pannonicus
ASV6227	0	0	0	0	0	0	0	0	0	23	0	0	0	0	0	0	0	0	0	0	0	0	0	0	0	0	0	0	0	0	0	0	0	0	0	0	0	0	0	p__Bacillariophyta	g__Cocconeis	s__Cocconeis_pediculus
ASV6217	0	0	0	0	0	0	0	0	0	0	0	0	0	0	0	0	0	0	0	0	0	0	0	0	0	24	0	0	0	0	0	0	0	0	0	0	0	0	0	p__Ciliophora	g__Stokesia	s__Stokesia_vernalis
ASV6216	0	0	0	0	0	0	0	0	0	0	0	0	0	0	0	0	0	0	0	0	0	0	0	0	0	16	8	0	0	0	0	0	0	0	0	0	0	0	0	p__Cryptophyta	g__Hemiselmis	s__Hemiselmis_rufescens
ASV6211	0	0	0	0	0	0	0	0	0	0	0	0	0	0	0	0	0	0	0	0	12	0	0	5	0	0	7	0	0	0	0	0	0	0	0	0	0	0	0	p__Ciliophora	g__Pseudomicrothorax	s__Pseudomicrothorax_dubius
ASV6210	0	0	0	0	0	0	0	0	0	0	0	0	0	0	0	0	0	0	0	0	14	0	0	0	0	10	0	0	0	0	0	0	0	0	0	0	0	0	0	p__Euglenophyta	g__Euglena	s__Euglena_agilis
ASV6209	0	0	0	0	0	0	0	0	0	0	0	0	0	0	0	0	0	0	0	0	12	0	0	12	0	0	0	0	0	0	0	0	0	0	0	0	0	0	0	p__Chlorophyta	g__Chlamydomonas	s__Chlamydomonas_splendida
ASV6205	0	0	0	0	0	0	0	0	0	0	0	0	0	0	0	0	0	0	0	24	0	0	0	0	0	0	0	0	0	0	0	0	0	0	0	0	0	0	0	p__Euglenophyta	g__Lepocinclis	s__Lepocinclis_playfairiana
ASV6204	0	0	0	0	0	0	0	0	0	0	0	0	0	0	0	0	0	0	0	0	0	0	0	0	0	0	0	0	0	0	0	0	0	0	0	0	0	0	24	p__Bacillariophyta	g__Mayamaea	s__Mayamaea_atomus
ASV6203	0	0	0	0	0	0	0	0	0	0	0	0	0	0	0	0	0	0	0	0	0	0	0	0	0	0	0	0	0	0	0	0	0	0	0	0	0	0	24	p__Sarcomastigophora	g__Pseudoparamoeba	s__Pseudoparamoeba_pagei
ASV620	0	0	0	0	0	0	0	0	0	0	0	0	0	0	0	0	0	0	0	0	35	0	0	0	0	0	0	0	0	7	77	97	24	573	13	0	50	44	80	p__Ciliophora	g__Coleps	s__Coleps_hirtus
ASV6194	0	0	0	0	0	0	0	0	0	0	0	0	0	0	0	0	0	0	0	0	0	0	0	0	0	0	0	0	0	0	0	0	0	0	0	0	0	0	24	p__Sarcomastigophora	g__Balamuthia	s__Balamuthia_mandrillaris
ASV6192	0	0	0	0	0	0	0	0	0	0	0	0	0	0	0	0	0	0	0	0	0	0	0	0	0	0	0	0	0	0	0	0	0	0	0	0	0	0	24	p__Apicomplexa	g__Leidyana	s__Leidyana_migrator
ASV6186	0	0	0	0	0	0	0	0	0	0	0	0	0	0	0	0	0	0	0	0	0	0	0	0	0	0	0	0	0	0	0	0	0	0	0	0	16	0	8	p__Chlorophyta	g__Chlorosarcinopsis	s__Chlorosarcinopsis_eremi
ASV6185	0	0	0	0	0	0	0	0	0	0	0	0	0	0	0	0	0	0	0	0	0	0	0	0	0	0	0	0	0	0	0	0	0	0	0	0	24	0	0	p__Chrysophyta	g__Paraphysomonas	s__Paraphysomonas_foraminifera
ASV6177	0	0	0	0	0	0	0	0	0	0	0	0	0	0	0	0	0	0	0	0	0	0	0	0	0	0	0	0	0	0	0	0	0	0	24	0	0	0	0	p__Ciliophora	g__Chilodonella	s__Chilodonella_parauncinata
ASV6172	0	0	0	0	0	0	0	0	0	0	0	0	0	0	0	0	0	0	0	0	0	0	0	0	0	0	0	0	0	0	13	6	0	0	0	0	0	0	5	p__Euglenophyta	g__Euglena	s__Euglena_agilis
ASV6166	0	0	0	0	0	0	0	0	0	0	0	0	0	0	0	0	0	0	0	0	0	0	0	0	0	0	0	0	0	24	0	0	0	0	0	0	0	0	0	p__Ciliophora	g__Paruroleptus	s__Paruroleptus_lepisma
ASV6161	0	0	0	0	0	0	0	0	0	0	0	0	0	0	0	0	0	0	0	0	11	0	0	0	0	0	0	8	0	0	0	0	0	0	0	5	0	0	0	p__Apicomplexa	g__Gregarina	s__Gregarina_caledia
ASV6148	0	0	0	0	0	24	0	0	0	0	0	0	0	0	0	0	0	0	0	0	0	0	0	0	0	0	0	0	0	0	0	0	0	0	0	0	0	0	0	p__Bacillariophyta	g__Cyclotella	s__Cyclotella_meneghiniana
ASV6144	0	0	0	24	0	0	0	0	0	0	0	0	0	0	0	0	0	0	0	0	0	0	0	0	0	0	0	0	0	0	0	0	0	0	0	0	0	0	0	p__Chlorophyta	g__Chlamydomonas	s__Chlamydomonas_leiostraca
ASV614	0	232	270	0	0	5	0	0	21	168	0	0	0	0	0	0	0	0	0	0	0	0	0	67	45	30	67	0	0	0	91	0	0	0	0	0	0	0	14	p__Bacillariophyta	g__Conticribra	s__Conticribra_weissflogiopsis
ASV6127	0	0	0	0	0	0	0	0	0	0	0	0	0	0	0	24	0	0	0	0	0	0	0	0	0	0	0	0	0	0	0	0	0	0	0	0	0	0	0	p__Chrysophyta	g__Chrysocapsa	s__Chrysocapsa_vernalis
ASV612	0	69	372	0	0	61	0	17	0	0	0	0	0	170	91	34	0	67	50	0	0	45	0	0	0	0	0	14	0	0	0	0	0	0	0	0	10	12	0	p__Apicomplexa	g__Plasmodium	s__Plasmodium_ovale
ASV6114	0	0	0	0	0	0	0	0	0	24	0	0	0	0	0	0	0	0	0	0	0	0	0	0	0	0	0	0	0	0	0	0	0	0	0	0	0	0	0	p__Sarcomastigophora	g__Naegleria	s__Naegleria_fowleri
ASV6106	0	0	0	0	0	0	0	0	0	0	0	0	0	0	0	0	0	0	0	0	0	25	0	0	0	0	0	0	0	0	0	0	0	0	0	0	0	0	0	p__Ciliophora	g__Chilodonella	s__Chilodonella_acuta
ASV6099	0	0	0	0	0	0	0	0	0	0	0	0	0	0	0	0	0	0	0	0	0	0	0	0	0	0	0	0	0	0	0	0	0	0	0	0	0	0	25	p__Chlorophyta	g__Chlamydomonas	s__Chlamydomonas_neoplanoconvexa
ASV6092	0	0	0	0	0	0	0	0	0	0	0	0	0	0	0	0	0	0	0	0	0	0	9	0	0	0	5	0	0	0	0	0	0	0	0	0	11	0	0	p__Ciliophora	g__Tunicothrix	s__Tunicothrix_brachysticha
ASV6084	0	0	0	0	0	0	0	0	0	0	0	0	0	0	0	0	0	0	0	0	0	0	0	0	0	19	0	0	0	0	0	0	0	0	6	0	0	0	0	p__Chlorophyta	g__Chlamydomonas	s__Chlamydomonas_nasuta
ASV6077	0	0	0	0	0	0	0	0	0	0	0	0	0	0	0	0	0	0	0	0	0	0	0	0	0	0	0	0	0	0	0	0	0	6	9	0	0	0	10	p__Chlorophyta	g__Pseudochlorella	s__Pseudochlorella_subsphaerica
ASV6074	0	0	0	0	0	0	0	0	0	0	0	0	0	0	0	0	0	0	0	0	0	0	0	0	0	0	0	0	0	0	18	0	0	0	0	0	0	7	0	p__Euglenophyta	g__Phacus	s__Phacus_trimarginatus
ASV6072	0	0	0	0	0	0	0	0	0	0	0	0	0	0	0	0	0	0	0	0	0	0	0	0	0	0	0	0	0	0	13	0	0	0	0	0	0	0	12	p__Sarcomastigophora	g__Entamoeba	s__Entamoeba_equi
ASV607	0	0	142	168	0	0	8	0	21	10	0	0	0	595	0	0	0	0	0	0	0	0	0	0	0	0	0	0	0	0	13	0	0	0	0	0	18	14	33	p__Chlorophyta	g__Chamaetrichon	s__Chamaetrichon_basiliensis
ASV6064	0	0	0	0	0	0	0	0	0	0	0	0	0	0	0	0	0	0	0	0	0	0	8	0	0	0	0	17	0	0	0	0	0	0	0	0	0	0	0	p__Ciliophora	g__Loxophyllum	s__Loxophyllum_perihoplophorum
ASV6060	0	0	0	0	0	0	0	25	0	0	0	0	0	0	0	0	0	0	0	0	0	0	0	0	0	0	0	0	0	0	0	0	0	0	0	0	0	0	0	p__Sarcomastigophora	g__Vannella	s__Vannella_miroides
ASV606	0	0	0	0	0	0	0	0	0	0	0	0	0	0	0	0	0	0	0	0	10	0	0	29	56	133	161	175	14	0	17	19	0	0	171	229	0	9	0	p__Xanthophyta	g__Gonyostomum	s__Gonyostomum_semen
ASV6059	0	0	0	0	0	0	0	25	0	0	0	0	0	0	0	0	0	0	0	0	0	0	0	0	0	0	0	0	0	0	0	0	0	0	0	0	0	0	0	p__Apicomplexa	g__Haemogregarina	s__Haemogregarina_balli
ASV6055	0	0	0	0	0	0	7	0	0	0	0	0	0	0	0	0	0	0	0	0	0	0	0	0	0	0	0	0	0	13	0	0	0	5	0	0	0	0	0	p__Chlorophyta	g__Nannochloris	s__Nannochloris_bacillaris
ASV6051	0	0	0	0	0	0	10	0	0	0	0	0	0	0	0	0	0	0	0	0	0	0	0	0	0	0	15	0	0	0	0	0	0	0	0	0	0	0	0	p__Ciliophora	g__Urosoma	s__Urosoma_salmastra
ASV6050	0	0	0	0	0	0	19	6	0	0	0	0	0	0	0	0	0	0	0	0	0	0	0	0	0	0	0	0	0	0	0	0	0	0	0	0	0	0	0	p__Chlorophyta	g__Compactochlorella	s__Compactochlorella_kochii
ASV6048	0	0	0	0	0	0	25	0	0	0	0	0	0	0	0	0	0	0	0	0	0	0	0	0	0	0	0	0	0	0	0	0	0	0	0	0	0	0	0	p__Chrysophyta	g__Ochromonas	s__Ochromonas_danica
ASV6047	0	0	0	0	0	0	21	0	0	0	0	0	0	0	0	0	0	0	0	0	0	0	0	0	0	0	0	0	0	0	0	0	0	0	0	4	0	0	0	p__Chlorophyta	g__Carteria	s__Carteria_radiosa
ASV6044	0	0	0	0	0	0	25	0	0	0	0	0	0	0	0	0	0	0	0	0	0	0	0	0	0	0	0	0	0	0	0	0	0	0	0	0	0	0	0	p__Sarcomastigophora	g__Rhynchomonas	s__Rhynchomonas_nasuta
ASV6040	0	0	25	0	0	0	0	0	0	0	0	0	0	0	0	0	0	0	0	0	0	0	0	0	0	0	0	0	0	0	0	0	0	0	0	0	0	0	0	p__Ciliophora	g__Phascolodon	s__Phascolodon_vorticella
ASV6036	25	0	0	0	0	0	0	0	0	0	0	0	0	0	0	0	0	0	0	0	0	0	0	0	0	0	0	0	0	0	0	0	0	0	0	0	0	0	0	p__Chlorophyta	g__Mamiella	s__Mamiella_gilva
ASV603	23	0	0	0	0	0	0	0	0	0	0	0	0	0	0	0	0	0	0	11	25	0	37	48	81	103	50	0	0	0	57	149	27	0	252	167	0	0	0	p__Bacillariophyta	g__Planothidium	s__Planothidium_lanceolatum
ASV6029	0	0	0	0	0	0	0	0	0	0	0	0	0	0	0	0	0	0	25	0	0	0	0	0	0	0	0	0	0	0	0	0	0	0	0	0	0	0	0	p__Xanthophyta	g__Psammamonas	s__Psammamonas_australis
ASV6018	0	0	0	0	0	0	0	0	0	25	0	0	0	0	0	0	0	0	0	0	0	0	0	0	0	0	0	0	0	0	0	0	0	0	0	0	0	0	0	p__Ciliophora	g__Tachysoma	s__Tachysoma_pellionellum
ASV6016	0	0	0	0	0	0	14	0	0	11	0	0	0	0	0	0	0	0	0	0	0	0	0	0	0	0	0	0	0	0	0	0	0	0	0	0	0	0	0	p__Chrysophyta	g__Chromulina	s__Chromulina_nebulosa
ASV6009	0	0	0	0	0	0	0	0	0	25	0	0	0	0	0	0	0	0	0	0	0	0	0	0	0	0	0	0	0	0	0	0	0	0	0	0	0	0	0	p__Sarcomastigophora	g__Nuclearia	s__Nuclearia_thermophila
ASV6003	0	0	0	0	0	0	0	0	25	0	0	0	0	0	0	0	0	0	0	0	0	0	0	0	0	0	0	0	0	0	0	0	0	0	0	0	0	0	0	p__Sarcomastigophora	g__Protostelium	s__Protostelium_mycophagum
ASV6	0	3010	4522	6622	1041	2166	8790	761	1602	733	1156	0	0	0	0	0	138	0	0	26	6340	300	4611	6279	2341	3160	3574	586	114	9131	473	91	0	59	56	84	494	448	50	p__Bacillariophyta	g__Cyclotella	s__Cyclotella_meneghiniana
ASV5999	0	0	0	0	0	0	0	0	0	0	0	0	0	0	0	0	0	0	0	0	0	0	0	7	19	0	0	0	0	0	0	0	0	0	0	0	0	0	0	p__Ciliophora	g__Chilodochona	s__Chilodochona_carcini
ASV5992	0	0	0	0	0	0	0	0	0	0	0	0	0	0	0	0	0	0	0	0	19	0	0	0	0	0	7	0	0	0	0	0	0	0	0	0	0	0	0	p__Chlorophyta	g__Chlamydomonas	s__Chlamydomonas_reinhardtii
ASV5989	0	0	0	0	0	0	0	0	0	0	0	0	0	0	0	0	0	0	0	0	0	0	0	0	0	0	0	0	0	0	0	0	0	0	0	0	0	0	26	p__Euglenophyta	g__Trachelomonas	s__Trachelomonas_similis
ASV5982	0	0	0	0	0	0	0	0	0	0	0	0	0	0	0	0	0	0	0	0	0	0	0	0	0	0	0	0	0	0	0	0	0	0	0	0	26	0	0	p__Sarcomastigophora	g__Herpetomonas	s__Herpetomonas_megaseliae
ASV5980	0	0	0	0	0	0	0	0	0	0	0	0	0	0	0	0	0	0	0	0	0	0	0	0	0	0	0	0	0	0	0	0	0	0	0	0	26	0	0	p__Rotifera	g__Cephalodella	s__Cephalodella_gibba
ASV5945	0	26	0	0	0	0	0	0	0	0	0	0	0	0	0	0	0	0	0	0	0	0	0	0	0	0	0	0	0	0	0	0	0	0	0	0	0	0	0	p__Euglenophyta	g__Monomorphina	s__Monomorphina_pseudopyrum
ASV594	61	166	0	0	0	0	0	0	0	0	0	0	0	0	0	0	0	0	0	58	103	0	106	113	84	100	202	0	0	0	0	0	0	0	0	52	0	0	0	p__Ciliophora	g__Limnostrombidium	s__Limnostrombidium_viride
ASV5931	0	0	0	0	0	0	0	0	0	0	0	0	0	0	0	26	0	0	0	0	0	0	0	0	0	0	0	0	0	0	0	0	0	0	0	0	0	0	0	p__Chlorophyta	g__Chlamydomonas	s__Chlamydomonas_debaryana
ASV5927	0	0	0	0	0	0	0	0	0	26	0	0	0	0	0	0	0	0	0	0	0	0	0	0	0	0	0	0	0	0	0	0	0	0	0	0	0	0	0	p__Sarcomastigophora	g__Neobodo	s__Neobodo_designis
ASV5926	0	0	0	0	0	0	0	0	0	26	0	0	0	0	0	0	0	0	0	0	0	0	0	0	0	0	0	0	0	0	0	0	0	0	0	0	0	0	0	p__Chrysophyta	g__Chromophyton	s__Chromophyton_vischeri
ASV5925	0	0	0	0	0	0	0	0	0	10	0	0	0	0	0	0	0	0	16	0	0	0	0	0	0	0	0	0	0	0	0	0	0	0	0	0	0	0	0	p__Cryptophyta	g__Rhodomonas	s__Rhodomonas_salina
ASV5923	0	0	0	0	0	0	0	0	0	6	0	0	0	0	0	0	0	0	0	0	0	0	0	0	0	0	0	0	0	0	8	3	0	0	0	0	5	4	0	p__Sarcomastigophora	g__Entamoeba	s__Entamoeba_equi
ASV592	0	0	126	195	112	0	107	0	0	51	0	0	0	0	0	0	0	0	41	0	36	0	0	0	56	46	67	0	0	0	0	0	0	0	17	196	0	0	0	p__Apicomplexa	g__Dactylosoma	s__Dactylosoma_ranarum
ASV5918	0	0	0	0	0	0	0	0	0	26	0	0	0	0	0	0	0	0	0	0	0	0	0	0	0	0	0	0	0	0	0	0	0	0	0	0	0	0	0	p__Sarcomastigophora	g__Parvamoeba	s__Parvamoeba_rugata
ASV5916	0	0	0	0	0	0	0	0	0	26	0	0	0	0	0	0	0	0	0	0	0	0	0	0	0	0	0	0	0	0	0	0	0	0	0	0	0	0	0	p__Cryptophyta	g__Katablepharis	s__Katablepharis_remigera
ASV5912	0	0	0	0	0	0	0	0	0	0	0	0	0	0	0	0	0	0	0	0	0	0	0	0	0	17	10	0	0	0	0	0	0	0	0	0	0	0	0	p__Chlorophyta	g__Atractomorpha	s__Atractomorpha_echinata
ASV5911	0	0	0	0	0	0	0	0	0	0	0	0	0	0	0	0	0	0	0	0	0	0	0	0	27	0	0	0	0	0	0	0	0	0	0	0	0	0	0	p__Apicomplexa	g__Gregarina	s__Gregarina_chortiocetes
ASV5907	0	0	0	0	0	0	0	0	0	0	0	0	0	0	0	0	0	0	0	0	27	0	0	0	0	0	0	0	0	0	0	0	0	0	0	0	0	0	0	p__Ciliophora	g__Tetrahymena	s__Tetrahymena_empidokyrea
ASV5901	0	0	0	0	0	0	0	0	0	0	0	0	0	0	0	0	0	0	0	0	0	0	0	0	0	0	0	0	0	0	0	0	0	0	0	0	0	0	27	p__Euglenophyta	g__Euglena	s__Euglena_deses
ASV59	0	0	0	0	0	0	22	0	728	1663	0	0	0	0	0	0	0	0	28	0	0	0	118	77	104	186	139	105	27	162	453	192	18	6107	208	328	17	35	15	p__Chrysophyta	g__Synura	s__Synura_petersenii
ASV5897	0	0	0	0	0	0	0	0	0	0	0	0	0	0	0	0	0	0	0	0	0	0	5	0	0	0	0	0	0	0	0	0	0	0	0	0	22	0	0	p__Apicomplexa	g__Gregarina	s__Gregarina_caledia
ASV5895	0	0	0	0	0	0	0	0	0	0	0	0	0	0	0	0	0	0	0	0	0	0	0	0	0	6	0	0	0	0	0	0	0	0	11	0	0	0	10	p__Ciliophora	g__Trochiliopsis	s__Trochiliopsis_australis
ASV5893	0	0	0	0	0	0	0	0	0	0	0	0	0	0	0	0	0	0	0	0	0	0	0	0	0	0	0	0	0	0	0	0	0	0	27	0	0	0	0	p__Rotifera	g__Proales	s__Proales_doliaris
ASV5886	0	0	0	0	0	0	0	0	0	0	0	0	0	0	0	0	0	0	0	0	0	0	0	0	0	0	0	0	0	0	18	0	0	0	0	0	0	0	9	p__Sarcomastigophora	g__Endostelium	s__Endostelium_crystalliferum
ASV5882	0	0	0	0	0	0	0	0	0	0	0	0	0	0	0	0	0	0	0	0	0	0	0	0	0	0	0	0	0	0	27	0	0	0	0	0	0	0	0	p__Rotifera	g__Monommata	s__Monommata_maculata
ASV5878	0	0	0	0	0	0	0	0	0	0	0	0	0	0	0	0	0	0	0	0	0	0	0	0	0	0	0	0	0	8	0	0	0	0	0	0	0	0	19	p__Sarcomastigophora	g__Korotnevella	s__Korotnevella_jeppesenii
ASV5876	0	0	0	0	0	0	0	0	0	0	0	0	0	0	0	0	0	0	0	0	0	0	0	0	0	0	0	0	0	27	0	0	0	0	0	0	0	0	0	p__Ciliophora	g__Stokesia	s__Stokesia_vernalis
ASV5875	0	0	0	0	0	0	0	0	0	0	0	0	0	0	0	0	0	0	0	0	0	0	0	0	0	0	0	0	0	27	0	0	0	0	0	0	0	0	0	p__Rhodophyta	g__Neorhodella	s__Neorhodella_cyanea
ASV5874	0	0	0	0	0	0	0	0	0	0	0	0	0	0	0	0	0	0	0	0	0	0	0	0	0	0	0	0	15	0	0	12	0	0	0	0	0	0	0	p__Chlorophyta	g__Chlamydomonas	s__Chlamydomonas_raudensis
ASV5872	0	0	0	0	0	0	0	0	0	0	0	0	0	0	0	0	0	0	0	0	0	0	0	0	0	0	0	27	0	0	0	0	0	0	0	0	0	0	0	p__Sarcomastigophora	g__Ichthyobodo	s__Ichthyobodo_necator
ASV5870	0	0	0	0	0	0	0	27	0	0	0	0	0	0	0	0	0	0	0	0	0	0	0	0	0	0	0	0	0	0	0	0	0	0	0	0	0	0	0	p__Sarcomastigophora	g__Rhynchomonas	s__Rhynchomonas_nasuta
ASV5869	0	0	0	0	0	0	0	27	0	0	0	0	0	0	0	0	0	0	0	0	0	0	0	0	0	0	0	0	0	0	0	0	0	0	0	0	0	0	0	p__Dinophyta	g__Nusuttodinium	s__Nusuttodinium_aeruginosum
ASV5864	0	0	0	0	0	0	6	0	0	0	0	0	0	0	0	0	0	0	0	0	0	0	0	0	0	0	0	0	0	0	10	0	0	0	0	0	7	4	0	p__Sarcomastigophora	g__Balamuthia	s__Balamuthia_mandrillaris
ASV5863	0	0	0	0	0	0	14	0	0	0	0	0	0	0	0	0	0	0	0	0	0	0	0	0	0	0	0	0	0	0	0	0	0	0	0	0	13	0	0	p__Chlorophyta	g__Chaetopeltis	s__Chaetopeltis_orbicularis
ASV5854	18	0	0	0	0	0	0	0	0	0	0	0	0	0	0	0	0	0	0	0	0	0	0	0	0	0	0	0	0	0	0	9	0	0	0	0	0	0	0	p__Chrysophyta	g__Dinobryon	s__Dinobryon_sociale
ASV5845	0	0	0	0	0	0	0	0	0	13	0	0	0	0	0	0	0	0	14	0	0	0	0	0	0	0	0	0	0	0	0	0	0	0	0	0	0	0	0	p__Chlorophyta	g__Pedinomonas	s__Pedinomonas_minor
ASV5843	0	0	0	0	0	0	0	0	0	27	0	0	0	0	0	0	0	0	0	0	0	0	0	0	0	0	0	0	0	0	0	0	0	0	0	0	0	0	0	p__Dinophyta	g__Archaeperidinium	s__Archaeperidinium_saanichi
ASV5842	0	0	0	0	0	0	0	0	0	5	0	0	0	0	0	0	0	0	0	0	0	0	0	0	0	0	4	0	0	0	18	0	0	0	0	0	0	0	0	p__Sarcomastigophora	g__Pseudoparamoeba	s__Pseudoparamoeba_pagei
ASV584	0	0	0	0	0	0	0	0	0	0	0	0	0	0	0	114	0	0	0	0	0	0	0	0	98	147	77	28	0	30	0	0	0	30	223	0	118	55	144	p__Chlorophyta	g__Chlorococcum	s__Chlorococcum_elkhartiense
ASV5835	0	0	0	0	0	0	0	0	27	0	0	0	0	0	0	0	0	0	0	0	0	0	0	0	0	0	0	0	0	0	0	0	0	0	0	0	0	0	0	p__Sarcomastigophora	g__Vermamoeba	s__Vermamoeba_vermiformis
ASV5832	0	0	0	0	0	0	0	0	0	0	0	0	0	0	0	0	0	0	0	0	0	0	0	0	8	7	13	0	0	0	0	0	0	0	0	0	0	0	0	p__Sarcomastigophora	g__Vannella	s__Vannella_epipetala
ASV5830	0	0	0	0	0	0	0	0	0	0	0	0	0	0	0	0	0	0	0	0	0	0	0	28	0	0	0	0	0	0	0	0	0	0	0	0	0	0	0	p__Chlorophyta	g__Chaetophora	s__Chaetophora_elegans
ASV5829	0	0	0	0	0	0	0	0	0	0	0	0	0	0	0	0	0	0	0	0	0	0	0	28	0	0	0	0	0	0	0	0	0	0	0	0	0	0	0	p__Ciliophora	g__Oxytricha	s__Oxytricha_ferruginea
ASV5827	0	0	0	0	0	0	0	0	0	0	0	0	0	0	0	0	0	0	0	0	0	0	28	0	0	0	0	0	0	0	0	0	0	0	0	0	0	0	0	p__Bacillariophyta	g__Cylindrotheca	s__Cylindrotheca_closterium
ASV5825	0	0	0	0	0	0	0	0	0	0	0	0	0	0	0	0	0	0	0	0	0	28	0	0	0	0	0	0	0	0	0	0	0	0	0	0	0	0	0	p__Ciliophora	g__Notohymena	s__Notohymena_australis
ASV5814	0	0	0	0	0	0	0	0	0	0	0	0	0	0	0	0	0	0	0	0	0	0	0	0	0	0	0	0	0	0	0	0	0	0	0	0	0	0	28	p__Sarcomastigophora	g__Endostelium	s__Endostelium_crystalliferum
ASV5809	0	0	0	0	0	0	0	0	0	0	0	0	0	0	0	0	0	0	0	0	0	0	0	0	0	0	0	0	0	0	0	0	0	0	0	0	0	0	28	p__Dinophyta	g__Azadinium	s__Azadinium_polongum
ASV5804	0	0	0	0	0	0	0	0	0	0	0	0	0	0	0	0	0	0	0	0	13	0	0	0	0	0	0	0	0	0	0	0	0	0	0	0	15	0	0	p__Chlorophyta	g__Monomastix	s__Monomastix_minuta
ASV5803	0	0	0	0	0	0	0	0	0	0	0	0	0	0	0	0	0	0	0	0	0	0	0	0	0	0	0	0	0	0	0	0	0	0	0	0	7	21	0	p__Euglenophyta	g__Strombomonas	s__Strombomonas_balvayi
ASV5790	0	0	0	0	0	0	0	0	0	0	0	0	0	0	0	0	0	0	0	0	0	0	0	0	0	4	0	0	0	0	0	0	0	5	11	3	0	0	5	p__Apicomplexa	g__Gregarina	s__Gregarina_ormierei
ASV579	0	86	0	0	0	80	6	123	81	0	0	81	0	28	499	0	60	0	32	0	0	0	0	0	0	0	0	0	0	0	0	0	0	0	0	0	0	0	0	p__Rhodophyta	g__Pyropia	s__Pyropia_yezoensis
ASV5789	0	0	0	0	0	0	0	0	0	0	0	0	0	0	0	0	0	0	0	0	0	0	0	0	0	0	0	0	0	0	0	0	0	28	0	0	0	0	0	p__Euglenophyta	g__Phacus	s__Phacus_orbicularis
ASV5782	0	0	0	0	0	0	0	0	0	0	0	0	0	0	0	0	0	0	0	0	0	0	0	0	0	0	0	0	0	0	28	0	0	0	0	0	0	0	0	p__Rotifera	g__Testudinella	s__Testudinella_patina
ASV5780	0	0	0	0	0	0	0	0	0	0	0	0	0	0	0	0	0	0	0	0	0	0	0	0	0	0	0	0	0	28	0	0	0	0	0	0	0	0	0	p__Chlorophyta	g__Tetracystis	s__Tetracystis_intermedia
ASV5777	0	0	0	0	0	0	0	0	0	0	0	0	0	0	0	0	0	0	0	0	0	0	0	0	0	0	0	0	28	0	0	0	0	0	0	0	0	0	0	p__Euglenophyta	g__Phacus	s__Phacus_limnophila
ASV5773	0	0	0	0	0	0	0	0	0	0	0	0	0	0	0	0	0	0	0	0	0	0	0	0	0	0	17	11	0	0	0	0	0	0	0	0	0	0	0	p__Ciliophora	g__Paramecium	s__Paramecium_bursaria
ASV5771	0	0	0	0	0	0	0	0	0	0	0	0	0	0	0	0	0	0	0	0	0	0	0	0	0	0	0	18	10	0	0	0	0	0	0	0	0	0	0	p__Ciliophora	g__Rubrioxytricha	s__Rubrioxytricha_haematoplasma
ASV577	0	0	210	0	0	0	59	0	0	420	0	0	0	124	0	0	86	0	26	0	14	0	0	0	13	23	9	0	0	0	14	0	0	0	35	32	15	0	0	p__Ciliophora	g__Vorticella	s__Vorticella_campanula
ASV5764	0	0	0	0	28	0	0	0	0	0	0	0	0	0	0	0	0	0	0	0	0	0	0	0	0	0	0	0	0	0	0	0	0	0	0	0	0	0	0	p__Chlorophyta	g__Mucidosphaerium	s__Mucidosphaerium_sphagnale
ASV5748	0	0	0	0	0	0	0	0	0	0	0	0	0	28	0	0	0	0	0	0	0	0	0	0	0	0	0	0	0	0	0	0	0	0	0	0	0	0	0	p__Sarcomastigophora	g__Parabodo	s__Parabodo_caudatus
ASV5745	0	0	0	0	0	0	0	0	0	28	0	0	0	0	0	0	0	0	0	0	0	0	0	0	0	0	0	0	0	0	0	0	0	0	0	0	0	0	0	p__Sarcomastigophora	g__Ichthyobodo	s__Ichthyobodo_necator
ASV574	0	0	0	0	0	0	0	0	0	0	0	0	0	0	0	0	0	0	0	142	162	9	102	88	127	123	169	111	36	0	19	0	0	0	0	0	0	0	0	p__Chlorophyta	g__Lobomonas	s__Lobomonas_monstruosa
ASV5739	0	0	0	0	0	0	0	0	0	8	0	0	0	0	0	0	0	0	0	0	0	0	0	0	0	0	0	0	0	0	0	3	0	0	0	0	17	0	0	p__Rhodophyta	g__Sonderella	s__Sonderella_linearis
ASV5738	0	0	0	0	0	0	0	0	0	28	0	0	0	0	0	0	0	0	0	0	0	0	0	0	0	0	0	0	0	0	0	0	0	0	0	0	0	0	0	p__Chrysophyta	g__Chromophyton	s__Chromophyton_rosanoffii
ASV5735	0	0	0	0	0	0	0	0	0	0	0	0	0	0	0	0	0	0	0	0	0	0	0	0	29	0	0	0	0	0	0	0	0	0	0	0	0	0	0	p__Ciliophora	g__Meseres	s__Meseres_corlissi
ASV5727	0	0	0	0	0	0	0	0	0	0	0	0	0	0	0	0	0	0	0	29	0	0	0	0	0	0	0	0	0	0	0	0	0	0	0	0	0	0	0	p__Chlorophyta	g__Wislouchiella	s__Wislouchiella_planctonica
ASV5726	0	0	0	0	0	0	0	0	0	0	0	0	0	0	0	0	0	0	0	29	0	0	0	0	0	0	0	0	0	0	0	0	0	0	0	0	0	0	0	p__Euglenophyta	g__Euglenaria	s__Euglenaria_anabaena
ASV5725	0	0	0	0	0	0	0	0	0	0	0	0	0	0	0	0	0	0	0	0	0	0	0	0	0	0	0	0	0	0	0	0	0	0	0	0	0	0	29	p__Chlorophyta	g__Gonium	s__Gonium_pectorale
ASV5722	0	0	0	0	0	0	0	0	0	0	0	0	0	0	0	0	0	0	0	27	0	0	0	0	0	0	0	0	0	0	0	0	0	0	0	0	0	2	0	p__Euglenophyta	g__Euglenaria	s__Euglenaria_anabaena
ASV572	0	0	0	42	0	0	0	0	0	0	0	0	0	0	0	0	0	0	0	0	341	0	251	277	142	0	0	0	0	0	16	21	0	0	0	0	0	0	0	p__Chlorophyta	g__Chlorella	s__Chlorella_variabilis
ASV5716	0	0	0	0	0	0	0	0	0	0	0	0	0	0	0	0	0	0	0	0	0	0	0	0	0	0	0	0	0	0	0	0	0	0	0	0	29	0	0	p__Bacillariophyta	g__Nitzschia	s__Nitzschia_thermalis
ASV5709	0	0	0	0	0	0	0	0	0	0	0	0	0	0	0	0	0	0	0	0	0	0	0	0	0	0	17	0	0	0	0	0	0	0	0	12	0	0	0	p__Ciliophora	g__Euplotes	s__Euplotes_euryhalinus
ASV5704	0	0	0	0	0	0	0	0	0	0	0	0	0	0	0	0	0	0	0	0	0	0	0	0	0	0	0	0	0	0	0	0	0	0	29	0	0	0	0	p__Sarcomastigophora	g__Angulamoeba	s__Angulamoeba_microcystivorans
ASV5698	0	0	0	0	0	0	0	0	0	0	0	0	0	0	0	0	0	0	0	0	0	0	0	0	0	0	0	0	0	29	0	0	0	0	0	0	0	0	0	p__Rotifera	g__Testudinella	s__Testudinella_patina
ASV5694	0	0	0	0	0	0	0	0	0	0	0	0	0	0	0	0	0	0	0	0	0	0	0	0	0	0	0	13	16	0	0	0	0	0	0	0	0	0	0	p__Ciliophora	g__Protogastrostyla	s__Protogastrostyla_sterkii
ASV5693	0	0	0	0	0	0	0	0	0	0	0	0	0	0	0	0	0	0	0	0	0	0	0	0	0	0	0	29	0	0	0	0	0	0	0	0	0	0	0	p__Ciliophora	g__Metopus	s__Metopus_hasei
ASV5682	0	0	0	0	0	0	0	0	0	0	0	0	0	0	0	0	0	0	29	0	0	0	0	0	0	0	0	0	0	0	0	0	0	0	0	0	0	0	0	p__Dinophyta	g__Woloszynskia	s__Woloszynskia_pascheri
ASV5679	0	0	0	0	0	0	0	0	0	0	0	0	0	0	0	0	0	0	29	0	0	0	0	0	0	0	0	0	0	0	0	0	0	0	0	0	0	0	0	p__Bacillariophyta	g__Aulacoseira	s__Aulacoseira_distans
ASV5676	0	0	0	0	0	0	0	0	0	0	0	29	0	0	0	0	0	0	0	0	0	0	0	0	0	0	0	0	0	0	0	0	0	0	0	0	0	0	0	p__Bacillariophyta	g__Gomphonema	s__Gomphonema_parvulum
ASV5668	0	0	0	0	0	0	0	0	29	0	0	0	0	0	0	0	0	0	0	0	0	0	0	0	0	0	0	0	0	0	0	0	0	0	0	0	0	0	0	p__Sarcomastigophora	g__Vermistella	s__Vermistella_arctica
ASV5666	0	0	0	0	0	0	0	0	0	0	0	0	0	0	0	0	0	0	0	0	0	0	0	0	16	14	0	0	0	0	0	0	0	0	0	0	0	0	0	p__Ciliophora	g__Hemiurosomoida	s__Hemiurosomoida_longa
ASV5663	0	0	0	0	0	0	0	0	0	0	0	0	0	0	0	0	0	0	0	0	0	0	0	30	0	0	0	0	0	0	0	0	0	0	0	0	0	0	0	p__Euglenophyta	g__Euglena	s__Euglena_agilis
ASV5656	0	0	0	0	0	0	0	0	0	0	0	0	0	0	0	0	0	0	0	0	0	0	0	0	0	0	0	0	0	0	0	0	0	0	0	0	0	0	30	p__Chlorophyta	g__Chlamydomonas	s__Chlamydomonas_reinhardtii
ASV5655	0	0	0	0	0	0	0	0	0	0	0	0	0	0	0	0	0	0	0	0	0	0	0	0	0	0	0	0	0	0	0	0	0	0	0	0	0	0	30	p__Sarcomastigophora	g__Angulamoeba	s__Angulamoeba_microcystivorans
ASV5654	0	0	0	0	0	0	0	0	0	0	0	0	0	0	0	0	0	0	0	0	3	0	0	0	0	0	0	0	0	0	0	0	0	0	0	0	0	0	27	p__Euglenophyta	g__Euglena	s__Euglena_agilis
ASV5652	0	0	0	0	0	0	0	0	0	0	0	0	0	0	0	0	0	0	0	0	0	0	0	0	0	0	0	0	0	0	0	0	0	0	0	0	0	30	0	p__Ciliophora	g__Hemiamphisiella	s__Hemiamphisiella_terricola
ASV5651	0	0	0	0	0	0	0	0	0	0	0	0	0	0	0	0	0	0	0	0	0	0	0	0	0	0	0	0	0	0	0	0	0	0	0	0	0	30	0	p__Ciliophora	g__Trachelius	s__Trachelius_ovum
ASV565	0	200	142	0	0	0	112	0	0	30	335	0	234	0	0	46	0	0	0	0	0	0	0	0	0	0	0	0	0	0	0	0	0	0	0	0	12	0	0	p__Sarcomastigophora	g__Sphaeroeca	s__Sphaeroeca_leprechaunica
ASV5647	0	0	0	0	0	0	0	0	0	0	0	0	0	0	0	0	0	0	0	0	23	0	0	0	0	0	0	0	0	0	0	0	0	0	0	0	7	0	0	p__Arthropoda	g__Daphnia	s__Daphnia_pulex
ASV5645	0	0	0	0	0	0	0	0	0	0	0	0	0	0	0	0	0	0	0	0	0	0	0	0	0	0	0	0	0	0	0	0	0	0	0	0	30	0	0	p__Apicomplexa	g__Ascogregarina	s__Ascogregarina_barretti
ASV5643	0	0	0	0	0	0	0	0	0	0	0	0	0	0	0	0	0	0	0	0	0	0	0	0	0	0	0	0	0	0	0	0	0	0	11	0	0	0	19	p__Chlorophyta	g__Coenocystis	s__Coenocystis_inconstans
ASV5642	0	0	0	0	0	0	0	0	0	0	0	0	0	0	0	0	0	0	0	0	0	0	0	0	0	0	0	0	0	0	0	0	0	5	0	0	25	0	0	p__Chlorophyta	g__Catena	s__Catena_viridis
ASV564	163	0	0	39	0	95	0	0	0	0	0	0	0	0	0	0	0	0	0	0	134	0	126	111	138	0	213	0	0	0	72	0	0	0	0	0	0	29	0	p__Rotifera	g__Ploesoma	s__Ploesoma_truncatum
ASV5639	0	0	0	0	0	0	0	0	0	0	0	0	0	0	0	0	0	0	0	0	5	0	0	0	0	0	0	0	0	0	0	25	0	0	0	0	0	0	0	p__Euglenophyta	g__Euglena	s__Euglena_tristella
ASV5637	0	0	0	0	0	0	0	0	0	0	0	0	0	0	0	0	0	0	0	0	0	0	0	0	0	0	0	0	0	0	0	30	0	0	0	0	0	0	0	p__Ciliophora	g__Stylonychia	s__Stylonychia_bifaria
ASV5636	0	0	0	0	0	0	0	0	0	0	0	0	0	0	0	0	0	0	0	0	0	0	0	0	0	0	0	0	0	0	6	13	0	0	11	0	0	0	0	p__Chlorophyta	g__Phacotus	s__Phacotus_lenticularis
ASV5633	0	0	0	0	0	0	0	0	0	0	0	0	0	0	0	0	0	0	0	0	0	0	0	0	0	0	0	0	0	0	16	10	0	0	4	0	0	0	0	p__Chlorophyta	g__Chlamydomonas	s__Chlamydomonas_mexicana
ASV5627	0	0	0	0	0	0	0	0	0	0	0	0	0	0	0	0	0	0	0	0	12	0	0	0	6	0	8	0	4	0	0	0	0	0	0	0	0	0	0	p__Chrysophyta	g__Synura	s__Synura_curtispina
ASV5626	0	0	0	0	0	0	0	0	0	0	0	0	0	0	0	0	0	0	0	0	0	0	0	0	0	0	14	0	7	0	0	0	0	0	0	0	9	0	0	p__Euglenophyta	g__Lepocinclis	s__Lepocinclis_acus
ASV5624	0	0	0	0	0	0	0	0	0	0	0	0	0	0	0	0	0	0	0	0	0	0	0	0	0	0	0	0	30	0	0	0	0	0	0	0	0	0	0	p__Ciliophora	g__Colpoda	s__Colpoda_inflata
ASV5622	0	0	0	0	0	0	0	0	0	0	0	0	0	0	0	0	0	0	0	0	0	0	0	0	0	0	0	4	0	0	9	0	0	0	0	0	17	0	0	p__Sarcomastigophora	g__Salpingoeca	s__Salpingoeca_tuba
ASV5621	0	0	0	0	0	0	0	0	0	0	0	0	0	0	0	0	0	0	0	0	0	0	0	0	0	0	6	11	8	0	0	0	0	0	0	5	0	0	0	p__Euglenophyta	g__Euglena	s__Euglena_agilis
ASV5617	0	0	0	0	0	0	0	0	0	0	0	0	0	0	0	0	0	0	0	0	0	0	0	0	0	0	0	11	19	0	0	0	0	0	0	0	0	0	0	p__Euglenophyta	g__Euglena	s__Euglena_agilis
ASV5614	0	0	0	0	0	0	0	0	0	0	0	0	0	0	0	0	0	0	0	0	0	0	0	0	0	0	0	30	0	0	0	0	0	0	0	0	0	0	0	p__Euglenophyta	g__Euglena	s__Euglena_deses
ASV5611	0	0	0	0	0	0	16	0	0	0	0	0	0	0	0	0	0	0	0	0	0	0	0	0	0	0	14	0	0	0	0	0	0	0	0	0	0	0	0	p__Cryptophyta	g__Goniomonas	s__Cryptomonas_pyrenoidifera
ASV5604	0	30	0	0	0	0	0	0	0	0	0	0	0	0	0	0	0	0	0	0	0	0	0	0	0	0	0	0	0	0	0	0	0	0	0	0	0	0	0	p__Bacillariophyta	g__Cyclotella	s__Cyclotella_meneghiniana
ASV559	0	0	0	0	0	0	0	0	0	16	0	0	0	0	0	0	0	0	0	0	64	0	66	52	48	139	110	126	25	57	16	19	0	8	88	58	182	64	8	p__Chlorophyta	g__Chlamydomonas	s__Chlamydomonas_gloeophila
ASV5580	0	0	0	0	0	0	0	0	0	0	0	0	0	0	0	0	0	0	0	0	0	0	0	14	0	17	0	0	0	0	0	0	0	0	0	0	0	0	0	p__Apicomplexa	g__Gregarina	s__Gregarina_caledia
ASV5578	0	0	0	0	0	0	0	0	0	0	0	0	0	0	0	0	0	0	0	0	8	0	0	0	14	0	9	0	0	0	0	0	0	0	0	0	0	0	0	p__Ciliophora	g__Diaxonella	s__Diaxonella_trimarginata
ASV5570	0	0	0	0	0	0	0	0	0	0	0	0	0	0	0	0	0	0	0	0	0	0	0	0	0	0	0	0	0	0	0	0	0	0	0	0	0	31	0	p__Rotifera	g__Brachionus	s__Brachionus_calyciflorus
ASV5567	0	0	0	0	0	0	0	0	0	0	0	0	0	0	0	0	0	0	0	0	0	0	0	0	0	0	0	0	0	0	0	0	0	0	0	0	19	0	12	p__Chlorophyta	g__Pseudomuriella	s__Pseudomuriella_schumacherensis
ASV5557	0	0	0	0	0	0	0	0	0	0	0	0	0	0	0	0	0	0	0	0	0	0	0	0	0	0	0	0	0	0	17	0	0	0	0	0	14	0	0	p__Chlorophyta	g__Chlorochytrium	s__Chlorochytrium_lemnae
ASV5553	0	0	0	0	0	0	0	0	0	0	0	0	0	0	0	0	0	0	0	0	0	0	0	0	0	0	9	0	0	0	22	0	0	0	0	0	0	0	0	p__Euglenophyta	g__Lepocinclis	s__Lepocinclis_playfairiana
ASV5552	0	0	0	0	0	0	0	0	0	0	0	0	0	0	0	0	0	0	0	0	0	0	0	0	0	0	0	0	0	0	16	0	0	0	0	0	9	0	6	p__Sarcomastigophora	g__Schizoplasmodium	s__Schizoplasmodium_cavostelioides
ASV5519	0	0	0	0	0	0	0	0	0	0	0	0	0	0	0	31	0	0	0	0	0	0	0	0	0	0	0	0	0	0	0	0	0	0	0	0	0	0	0	p__Dinophyta	g__Amphidinium	s__Amphidinium_mootonorum
ASV5511	0	0	0	0	0	0	0	0	0	15	0	0	0	0	0	0	0	0	16	0	0	0	0	0	0	0	0	0	0	0	0	0	0	0	0	0	0	0	0	p__Sarcomastigophora	g__Nuclearia	s__Nuclearia_thermophila
ASV551	0	0	0	0	0	0	0	0	0	0	0	0	0	0	0	0	0	0	0	0	97	0	182	240	149	144	16	0	0	215	0	0	0	0	130	0	0	0	0	p__Chlorophyta	g__Chlamydomonas	s__Chlamydomonas_reinhardtii
ASV5509	0	0	0	0	0	0	0	0	0	23	0	0	0	0	0	0	0	0	8	0	0	0	0	0	0	0	0	0	0	0	0	0	0	0	0	0	0	0	0	p__Rhodophyta	g__Galdieria	s__Galdieria_sulphuraria
ASV5504	0	0	0	0	0	0	0	0	0	0	0	0	0	0	0	0	0	0	0	0	0	0	0	0	32	0	0	0	0	0	0	0	0	0	0	0	0	0	0	p__Ciliophora	g__Stokesia	s__Stokesia_vernalis
ASV550	131	0	0	0	0	0	0	0	0	0	0	0	0	0	0	0	0	0	0	0	0	26	0	0	22	0	23	51	0	13	42	15	822	19	0	9	0	0	0	p__Ciliophora	g__Spathidium	s__Spathidium_stammeri
ASV55	0	0	0	0	0	0	0	0	0	0	0	0	0	0	0	0	0	0	0	0	8144	270	1527	213	173	259	188	38	0	0	0	0	0	0	0	0	0	0	0	p__Chlorophyta	g__Characiochloris	s__Characiochloris_sasae
ASV5485	0	0	0	0	0	0	0	0	0	0	0	0	0	0	0	0	0	0	0	0	0	0	0	0	0	0	0	0	0	0	0	0	0	0	0	0	26	6	0	p__Euglenophyta	g__Trachelomonas	s__Trachelomonas_scabra
ASV5482	0	0	0	0	0	0	0	0	0	0	0	0	0	0	0	0	0	0	0	0	0	0	0	0	0	0	0	0	0	0	0	0	0	19	0	0	0	0	13	p__Ciliophora	g__Phascolodon	s__Phascolodon_vorticella
ASV5475	0	0	0	0	0	0	0	0	0	0	0	0	0	0	0	0	0	0	0	0	0	0	0	12	0	0	0	0	0	0	7	0	0	3	0	0	0	0	10	p__Chlorophyta	g__Aphanochaete	s__Aphanochaete_elegans
ASV5468	0	0	0	0	0	0	0	0	0	0	0	0	0	0	0	0	0	0	0	0	0	0	0	0	0	0	8	14	0	10	0	0	0	0	0	0	0	0	0	p__Dinophyta	g__Woloszynskia	s__Woloszynskia_leopoliensis
ASV5467	0	0	0	0	0	0	0	0	0	0	0	0	0	0	0	0	0	0	0	0	0	0	0	0	0	0	0	22	0	0	0	0	0	0	0	0	0	10	0	p__Ciliophora	g__Enchelys	s__Enchelys_polynucleata
ASV5466	0	0	0	0	0	0	0	0	0	0	0	0	0	0	0	0	0	0	0	0	0	0	0	0	0	0	0	32	0	0	0	0	0	0	0	0	0	0	0	p__Chlorophyta	g__Haematococcus	s__Haematococcus_lacustris
ASV5449	0	0	0	0	0	0	0	0	0	13	0	0	0	0	0	0	0	0	0	0	0	0	0	0	0	0	0	19	0	0	0	0	0	0	0	0	0	0	0	p__Chlorophyta	g__Pandorina	s__Pandorina_morum
ASV5448	0	0	0	0	0	0	0	0	0	7	0	0	0	0	0	0	0	0	0	0	0	0	0	10	0	0	0	0	0	0	0	0	0	0	0	0	6	9	0	p__Chlorophyta	g__Chlamydomonas	s__Chlamydomonas_debaryana
ASV5440	0	0	0	0	0	0	0	0	32	0	0	0	0	0	0	0	0	0	0	0	0	0	0	0	0	0	0	0	0	0	0	0	0	0	0	0	0	0	0	p__Sarcomastigophora	g__Protostelium	s__Protostelium_mycophagum
ASV5433	0	0	0	0	0	0	0	0	0	0	0	0	0	0	0	0	0	0	0	0	0	33	0	0	0	0	0	0	0	0	0	0	0	0	0	0	0	0	0	p__Sarcomastigophora	g__Korotnevella	s__Korotnevella_jeppesenii
ASV5430	0	0	0	0	0	0	0	0	0	0	0	0	0	0	0	0	0	0	0	0	27	0	3	0	0	3	0	0	0	0	0	0	0	0	0	0	0	0	0	p__Euglenophyta	g__Lepocinclis	s__Lepocinclis_playfairiana
ASV5425	0	0	0	0	0	0	0	0	0	0	0	0	0	0	0	0	0	0	0	0	0	0	0	0	0	0	0	0	0	0	0	0	0	0	0	0	0	0	33	p__Sarcomastigophora	g__Endostelium	s__Endostelium_crystalliferum
ASV5424	0	0	0	0	0	0	0	0	0	0	0	0	0	0	0	0	0	0	0	0	0	0	0	0	0	0	0	0	0	0	0	0	0	0	0	0	0	0	33	p__Chlorophyta	g__Chromochloris	s__Chromochloris_zofingiensis
ASV5423	0	0	0	0	0	0	0	0	0	0	0	0	0	0	0	0	0	0	0	0	0	0	0	0	0	0	0	0	0	0	0	0	0	0	0	0	33	0	0	p__Ciliophora	g__Nothoholosticha	s__Nothoholosticha_fasciola
ASV5420	0	0	0	0	0	0	0	0	0	0	0	0	0	0	0	0	0	0	0	0	0	0	0	0	0	0	0	0	0	0	0	0	0	0	33	0	0	0	0	p__Bacillariophyta	g__Urosolenia	s__Urosolenia_eriensis
ASV5415	0	0	0	0	0	0	0	0	0	0	0	0	0	0	0	0	0	0	0	0	0	0	0	0	0	0	0	0	0	0	0	22	0	0	0	0	11	0	0	p__Chlorophyta	g__Chlamydomonas	s__Chlamydomonas_splendida
ASV5409	0	0	0	0	0	0	0	0	0	0	0	0	0	0	0	0	0	0	0	0	0	0	0	0	0	0	0	0	0	33	0	0	0	0	0	0	0	0	0	p__Ciliophora	g__Tetrahymena	s__Tetrahymena_rostrata
ASV5404	0	0	0	0	0	0	0	0	0	0	0	0	0	0	0	0	0	0	0	0	0	0	12	0	0	0	0	0	21	0	0	0	0	0	0	0	0	0	0	p__Chlorophyta	g__Pumiliosphaera	s__Pumiliosphaera_acidophila
ASV54	0	0	0	0	0	0	0	0	0	0	0	0	0	0	0	0	0	0	0	0	1661	269	1774	3497	1256	1941	491	0	19	0	0	0	0	0	38	0	0	0	5	p__Chlorophyta	g__Golenkinia	s__Golenkinia_brevispicula
ASV5398	0	0	0	0	0	0	9	0	0	0	0	0	0	0	0	0	0	0	0	0	0	0	0	0	0	0	0	24	0	0	0	0	0	0	0	0	0	0	0	p__Sarcomastigophora	g__Vannella	s__Vannella_planctonica
ASV5397	0	0	0	0	0	0	13	0	0	0	0	0	0	0	0	0	0	0	0	0	0	0	0	0	0	0	0	0	0	20	0	0	0	0	0	0	0	0	0	p__Ciliophora	g__Porpostoma	s__Porpostoma_notata
ASV5395	0	0	0	0	0	0	33	0	0	0	0	0	0	0	0	0	0	0	0	0	0	0	0	0	0	0	0	0	0	0	0	0	0	0	0	0	0	0	0	p__Sarcomastigophora	g__Bodo	s__Bodo_saltans
ASV5388	33	0	0	0	0	0	0	0	0	0	0	0	0	0	0	0	0	0	0	0	0	0	0	0	0	0	0	0	0	0	0	0	0	0	0	0	0	0	0	p__Cryptophyta	g__Goniomonas	s__Cryptomonas_pyrenoidifera
ASV537	0	0	0	0	0	63	141	44	334	68	0	0	0	0	0	0	151	0	0	0	14	0	14	13	23	52	54	17	11	40	0	0	0	13	80	65	0	0	0	p__Chrysophyta	g__Paraphysomonas	s__Paraphysomonas_imperforata
ASV5360	0	0	0	0	0	0	0	0	33	0	0	0	0	0	0	0	0	0	0	0	0	0	0	0	0	0	0	0	0	0	0	0	0	0	0	0	0	0	0	p__Rhodophyta	g__Pyropia	s__Pyropia_yezoensis
ASV5357	0	0	0	0	0	0	0	0	0	0	0	0	0	0	0	0	0	0	0	0	0	34	0	0	0	0	0	0	0	0	0	0	0	0	0	0	0	0	0	p__Sarcomastigophora	g__Raperostelium	s__Raperostelium_ohioense
ASV5356	0	0	0	0	0	0	0	0	0	0	0	0	0	0	0	0	0	0	0	0	0	34	0	0	0	0	0	0	0	0	0	0	0	0	0	0	0	0	0	p__Ciliophora	g__Pseudochilodonopsis	s__Pseudochilodonopsis_quadrivacuolata
ASV5353	0	0	0	0	0	0	0	0	0	0	0	0	0	0	0	0	0	0	0	0	21	0	0	0	0	13	0	0	0	0	0	0	0	0	0	0	0	0	0	p__Cryptophyta	g__Goniomonas	s__Cryptomonas_pyrenoidifera
ASV535	0	0	0	0	0	0	0	0	0	0	0	0	0	0	0	0	0	0	0	0	73	0	42	99	92	326	243	76	0	33	0	0	0	0	215	0	0	0	0	p__Chlorophyta	g__Chlamydomonas	s__Chlamydomonas_bacca
ASV5349	0	0	0	0	0	0	0	0	0	0	0	0	0	0	0	0	0	0	0	0	0	0	7	8	0	6	0	0	0	0	0	0	0	0	0	0	0	0	13	p__Ciliophora	g__Stichotricha	s__Stichotricha_aculeata
ASV5348	0	0	0	0	0	0	0	0	0	0	0	0	0	0	0	0	0	0	0	0	0	0	0	0	0	0	0	0	0	0	0	0	0	0	0	0	0	0	34	p__Euglenophyta	g__Lepocinclis	s__Lepocinclis_salina
ASV5346	0	0	0	0	0	0	0	0	0	0	0	0	0	0	0	0	0	0	0	0	0	0	0	0	0	0	0	0	0	0	0	0	0	0	0	0	34	0	0	p__Apicomplexa	g__Leidyana	s__Leidyana_migrator
ASV5344	0	0	0	0	0	0	0	0	0	0	0	0	0	0	0	0	0	0	0	0	0	0	0	0	0	0	0	0	0	0	0	0	0	0	20	0	0	0	14	p__Ciliophora	g__Spathidium	s__Spathidium_stammeri
ASV5328	0	0	0	0	0	34	0	0	0	0	0	0	0	0	0	0	0	0	0	0	0	0	0	0	0	0	0	0	0	0	0	0	0	0	0	0	0	0	0	p__Cryptophyta	g__Goniomonas	s__Cryptomonas_curvata
ASV5325	0	0	0	34	0	0	0	0	0	0	0	0	0	0	0	0	0	0	0	0	0	0	0	0	0	0	0	0	0	0	0	0	0	0	0	0	0	0	0	p__Sarcomastigophora	g__Neobodo	s__Neobodo_saliens
ASV5324	0	0	34	0	0	0	0	0	0	0	0	0	0	0	0	0	0	0	0	0	0	0	0	0	0	0	0	0	0	0	0	0	0	0	0	0	0	0	0	p__Bacillariophyta	g__Cocconeis	s__Cocconeis_pediculus
ASV5323	0	34	0	0	0	0	0	0	0	0	0	0	0	0	0	0	0	0	0	0	0	0	0	0	0	0	0	0	0	0	0	0	0	0	0	0	0	0	0	p__Bacillariophyta	g__Thalassiosira	s__Thalassiosira_tenera
ASV5321	0	0	0	0	0	0	0	0	0	0	0	0	0	0	0	0	0	0	9	0	0	0	0	0	0	0	0	0	0	0	0	0	0	0	0	0	25	0	0	p__Sarcomastigophora	g__Neobodo	s__Neobodo_designis
ASV5313	0	0	0	0	0	0	0	0	0	0	0	0	0	0	0	34	0	0	0	0	0	0	0	0	0	0	0	0	0	0	0	0	0	0	0	0	0	0	0	p__Ciliophora	g__Urostomides	s__Urostomides_striatus
ASV5307	0	0	0	0	0	0	0	0	0	4	0	0	0	0	0	0	0	0	0	0	0	0	0	0	13	9	0	0	0	0	0	0	0	0	8	0	0	0	0	p__Ciliophora	g__Condylostoma	s__Condylostoma_spatiosum
ASV5305	0	0	0	0	0	0	0	0	0	34	0	0	0	0	0	0	0	0	0	0	0	0	0	0	0	0	0	0	0	0	0	0	0	0	0	0	0	0	0	p__Sarcomastigophora	g__Neobodo	s__Neobodo_saliens
ASV5304	0	0	0	0	0	0	0	0	0	34	0	0	0	0	0	0	0	0	0	0	0	0	0	0	0	0	0	0	0	0	0	0	0	0	0	0	0	0	0	p__Chrysophyta	g__Chromulina	s__Chromulina_chionophila
ASV5297	0	0	0	0	0	0	0	0	0	0	0	0	0	0	0	0	0	0	0	0	0	0	0	35	0	0	0	0	0	0	0	0	0	0	0	0	0	0	0	p__Arthropoda	g__Eucyclops	s__Eucyclops_speratus
ASV5291	0	0	0	0	0	0	0	0	0	0	0	0	0	0	0	0	0	0	0	0	0	0	0	0	0	0	0	0	0	0	0	0	0	0	0	0	0	0	35	p__Sarcomastigophora	g__Endostelium	s__Endostelium_crystalliferum
ASV529	3	0	0	0	0	0	0	0	0	0	0	0	0	0	0	0	0	0	0	0	173	0	132	175	142	195	116	90	89	0	13	0	0	0	7	5	71	0	0	p__Bacillariophyta	g__Planothidium	s__Planothidium_lanceolatum
ASV5283	0	0	0	0	0	0	0	0	0	0	0	0	0	0	0	0	0	0	0	0	0	0	0	0	0	0	0	0	0	0	0	0	0	0	24	0	0	0	11	p__Chlorophyta	g__Tetracystis	s__Tetracystis_pampae
ASV528	0	0	0	0	0	169	26	0	0	11	0	0	0	0	0	0	0	0	0	0	58	0	121	112	88	72	15	42	69	86	91	74	0	70	16	0	15	58	23	p__Chlorophyta	g__Desmodesmus	s__Desmodesmus_pannonicus
ASV5276	0	0	0	0	0	0	0	0	0	0	0	0	0	0	0	0	0	0	0	0	0	0	0	15	0	0	0	0	0	0	20	0	0	0	0	0	0	0	0	p__Cryptophyta	g__Goniomonas	s__Cryptomonas_paramecium
ASV5275	0	0	0	0	0	0	0	0	0	0	0	0	0	0	0	0	0	0	0	0	0	12	0	0	0	0	0	0	0	0	23	0	0	0	0	0	0	0	0	p__Dinophyta	g__Woloszynskia	s__Woloszynskia_leopoliensis
ASV5272	0	0	0	0	0	0	0	0	0	0	0	0	0	0	0	0	0	0	0	0	0	0	0	0	0	0	0	0	0	0	13	15	7	0	0	0	0	0	0	p__Sarcomastigophora	g__Sphaeroeca	s__Sphaeroeca_leprechaunica
ASV5271	0	0	0	0	0	0	0	0	0	0	0	0	0	0	0	0	0	0	0	0	0	0	0	0	0	0	0	0	0	0	21	14	0	0	0	0	0	0	0	p__Euglenophyta	g__Lepocinclis	s__Lepocinclis_buetschlii
ASV5262	0	0	0	0	0	0	0	0	0	0	0	0	0	0	0	0	0	0	0	0	0	0	5	0	0	0	5	10	0	0	15	0	0	0	0	0	0	0	0	p__Dinophyta	g__Azadinium	s__Azadinium_polongum
ASV5258	0	0	0	0	0	0	18	0	0	0	0	0	0	0	0	0	0	0	0	0	0	0	0	0	17	0	0	0	0	0	0	0	0	0	0	0	0	0	0	p__Ciliophora	g__Tetrahymena	s__Tetrahymena_pigmentosa
ASV5254	0	35	0	0	0	0	0	0	0	0	0	0	0	0	0	0	0	0	0	0	0	0	0	0	0	0	0	0	0	0	0	0	0	0	0	0	0	0	0	p__Bacillariophyta	g__Thalassiosira	s__Thalassiosira_tenera
ASV5250	0	0	0	0	0	0	0	0	0	0	0	0	0	0	0	0	0	0	20	0	0	0	0	0	0	0	0	0	0	0	0	0	0	15	0	0	0	0	0	p__Cryptophyta	g__Chroomonas	s__Chroomonas_vectensis
ASV525	0	0	0	0	0	0	0	0	0	0	0	0	0	0	0	0	0	0	0	38	0	19	0	22	67	26	67	10	0	18	64	69	789	14	14	0	0	9	0	p__Ciliophora	g__Bursaria	s__Bursaria_truncatella
ASV5242	0	0	0	0	0	0	0	0	0	0	0	0	0	0	35	0	0	0	0	0	0	0	0	0	0	0	0	0	0	0	0	0	0	0	0	0	0	0	0	p__Sarcomastigophora	g__Difflugia	s__Difflugia_gramen
ASV524	0	235	0	0	0	0	0	0	0	827	0	0	0	0	0	0	0	0	0	0	0	12	0	0	6	6	0	0	0	10	36	32	0	10	0	7	34	7	6	p__Bacillariophyta	g__Melosira	s__Melosira_varians
ASV5235	0	0	0	0	0	0	0	0	0	0	0	0	0	0	0	0	0	0	0	0	0	0	0	36	0	0	0	0	0	0	0	0	0	0	0	0	0	0	0	p__Chlorophyta	g__Fritschiella	s__Fritschiella_tuberosa
ASV5234	0	0	0	0	0	0	0	0	0	0	0	0	0	0	0	0	0	0	0	0	0	0	0	0	0	3	0	0	0	0	0	0	0	0	0	0	0	0	33	p__Chlorophyta	g__Pleurastrum	s__Pleurastrum_terricola
ASV5233	0	0	0	0	0	0	0	0	0	0	0	0	0	0	0	0	0	0	0	0	0	0	0	0	0	0	0	0	0	0	0	0	0	0	0	0	0	0	36	p__Euglenophyta	g__Lepocinclis	s__Lepocinclis_buetschlii
ASV5229	0	0	0	0	0	0	0	0	0	0	0	0	0	0	0	0	0	0	0	0	0	0	0	0	0	0	0	0	0	0	0	0	0	29	0	0	0	7	0	p__Apicomplexa	g__Hepatozoon	s__Hepatozoon_sipedon
ASV5225	0	0	0	0	0	0	0	0	0	0	0	0	0	0	0	0	0	0	0	0	0	0	0	0	0	6	8	0	0	0	13	0	9	0	0	0	0	0	0	p__Cryptophyta	g__Goniomonas	s__Cryptomonas_pyrenoidifera
ASV5222	0	0	0	0	0	0	0	0	0	0	0	0	0	0	0	0	0	0	0	0	0	0	0	0	0	23	0	13	0	0	0	0	0	0	0	0	0	0	0	p__Chlorophyta	g__Phacotus	s__Phacotus_lenticularis
ASV5221	0	0	0	0	0	0	0	36	0	0	0	0	0	0	0	0	0	0	0	0	0	0	0	0	0	0	0	0	0	0	0	0	0	0	0	0	0	0	0	p__Arthropoda	g__Temora	s__Temora_longicornis
ASV5219	0	0	0	0	0	0	36	0	0	0	0	0	0	0	0	0	0	0	0	0	0	0	0	0	0	0	0	0	0	0	0	0	0	0	0	0	0	0	0	p__Sarcomastigophora	g__Nuclearia	s__Nuclearia_moebiusi
ASV5211	0	36	0	0	0	0	0	0	0	0	0	0	0	0	0	0	0	0	0	0	0	0	0	0	0	0	0	0	0	0	0	0	0	0	0	0	0	0	0	p__Bacillariophyta	g__Cymatopleura	s__Cymatopleura_solea
ASV5201	0	0	0	0	0	0	0	0	0	0	0	0	0	0	0	36	0	0	0	0	0	0	0	0	0	0	0	0	0	0	0	0	0	0	0	0	0	0	0	p__Ciliophora	g__Bresslaua	s__Bresslaua_vorax
ASV5184	0	0	0	0	0	0	0	0	0	0	0	0	0	0	0	0	0	0	0	0	0	0	0	0	0	0	0	0	0	0	0	0	0	0	0	0	18	9	10	p__Chlorophyta	g__Chlorococcum	s__Chlorococcum_vacuolatum
ASV5181	0	0	0	0	0	0	0	0	0	0	0	0	0	0	0	0	0	0	0	0	0	0	0	0	0	0	0	0	0	0	0	0	0	0	0	0	27	0	10	p__Apicomplexa	g__Mattesia	s__Mattesia_geminata
ASV5177	0	0	0	0	0	0	0	0	0	0	0	0	0	0	0	0	0	0	0	0	0	0	0	0	0	0	0	0	0	0	0	0	0	0	11	0	16	0	10	p__Ciliophora	g__Etoschophrya	s__Etoschophrya_inornata
ASV5173	0	0	0	0	0	0	0	0	0	0	0	0	0	0	0	0	0	0	0	0	0	0	0	0	0	0	12	0	0	0	10	0	0	0	0	0	15	0	0	p__Chlorophyta	g__Chlorococcum	s__Chlorococcum_vacuolatum
ASV5170	0	0	0	0	0	0	0	0	0	0	0	0	0	0	0	0	0	0	0	0	0	0	0	0	0	0	0	0	0	0	21	16	0	0	0	0	0	0	0	p__Dinophyta	g__Roscoffia	s__Roscoffia_capitata
ASV517	0	0	0	0	0	0	0	0	0	0	0	0	0	0	0	0	0	0	0	1167	10	68	0	0	0	0	0	0	0	0	0	0	0	0	0	0	0	0	0	p__Chlorophyta	g__Wislouchiella	s__Wislouchiella_planctonica
ASV5166	0	0	0	0	0	0	0	0	0	0	0	0	0	0	0	0	0	0	0	0	0	0	0	0	0	0	0	0	0	10	18	0	0	0	9	0	0	0	0	p__Ciliophora	g__Litonotus	s__Litonotus_paracygnus
ASV5161	0	0	0	0	0	0	0	0	0	0	0	0	0	0	0	0	0	0	0	0	0	0	0	0	0	0	0	14	0	0	23	0	0	0	0	0	0	0	0	p__Ciliophora	g__Holosticha	s__Holosticha_multistylata
ASV5152	0	0	0	0	0	27	0	0	0	0	0	0	0	0	0	0	0	0	0	0	0	0	0	0	0	0	0	0	0	0	10	0	0	0	0	0	0	0	0	p__Ciliophora	g__Homalozoon	s__Homalozoon_vermiculare
ASV5144	0	0	0	0	0	0	0	0	0	0	0	0	0	0	0	0	0	0	37	0	0	0	0	0	0	0	0	0	0	0	0	0	0	0	0	0	0	0	0	p__Apicomplexa	g__Haemogregarina	s__Haemogregarina_balli
ASV5125	0	0	0	0	0	0	0	0	0	0	0	0	0	0	0	0	0	0	0	0	0	0	0	38	0	0	0	0	0	0	0	0	0	0	0	0	0	0	0	p__Ciliophora	g__Lagynophrya	s__Lagynophrya_acuminata
ASV5123	0	0	0	0	0	0	0	0	0	0	0	0	0	0	0	0	0	0	0	0	0	38	0	0	0	0	0	0	0	0	0	0	0	0	0	0	0	0	0	p__Apicomplexa	g__Prismatospora	s__Prismatospora_evansi
ASV5112	0	0	0	0	0	0	0	0	0	0	0	0	0	0	0	0	0	0	0	0	0	0	0	0	0	0	0	0	0	0	0	0	0	0	0	0	26	12	0	p__Euglenophyta	g__Cryptoglena	s__Cryptoglena_pigra
ASV5111	0	0	0	0	0	0	0	0	0	0	0	0	0	0	0	0	0	0	0	0	0	0	0	0	0	0	0	0	0	0	0	0	0	0	0	0	38	0	0	p__Bacillariophyta	g__Cymbella	s__Cymbella_cistuliformis
ASV5105	0	0	0	0	0	0	0	0	0	0	0	0	0	0	0	0	0	0	0	0	0	0	0	0	0	0	0	0	0	0	12	9	0	0	0	0	17	0	0	p__Chlorophyta	g__Lobomonas	s__Lobomonas_monstruosa
ASV510	58	0	0	148	0	208	18	15	0	71	116	0	0	0	0	15	0	0	0	5	28	0	39	37	40	42	60	33	0	69	22	19	4	212	0	3	0	3	0	p__Bacillariophyta	g__Cocconeis	s__Cocconeis_placentula
ASV5099	0	0	0	0	0	0	0	0	0	0	0	0	0	0	0	0	0	0	0	0	0	0	0	0	0	0	0	0	38	0	0	0	0	0	0	0	0	0	0	p__Chlorophyta	g__Chlamydomonas	s__Chlamydomonas_debaryana
ASV5096	0	0	0	0	0	0	0	0	0	0	0	0	0	0	0	0	0	0	0	0	0	0	0	27	0	0	0	11	0	0	0	0	0	0	0	0	0	0	0	p__Dinophyta	g__Tovellia	s__Tovellia_aveirensis
ASV5091	0	0	0	0	0	0	0	38	0	0	0	0	0	0	0	0	0	0	0	0	0	0	0	0	0	0	0	0	0	0	0	0	0	0	0	0	0	0	0	p__Apicomplexa	g__Gregarina	s__Gregarina_cloptoni
ASV5089	0	0	0	0	0	0	38	0	0	0	0	0	0	0	0	0	0	0	0	0	0	0	0	0	0	0	0	0	0	0	0	0	0	0	0	0	0	0	0	p__Chrysophyta	g__Poteriospumella	s__Poteriospumella_lacustris
ASV5078	0	0	0	0	0	0	0	0	0	0	0	0	0	0	0	0	0	0	28	0	0	0	0	0	0	0	0	0	0	0	0	0	0	0	0	0	0	0	10	p__Ciliophora	g__Trochochilodon	s__Trochochilodon_flavus
ASV5077	0	0	0	0	0	0	0	0	0	0	0	0	0	0	0	0	0	0	38	0	0	0	0	0	0	0	0	0	0	0	0	0	0	0	0	0	0	0	0	p__Rhodophyta	g__Chroodactylon	s__Chroodactylon_ornatum
ASV5068	0	0	0	0	0	0	0	0	0	10	0	0	0	0	0	0	0	0	26	0	0	0	0	0	0	0	0	0	0	0	2	0	0	0	0	0	0	0	0	p__Sarcomastigophora	g__Cryptodifflugia	s__Cryptodifflugia_oviformis
ASV5063	0	0	0	0	0	0	0	0	38	0	0	0	0	0	0	0	0	0	0	0	0	0	0	0	0	0	0	0	0	0	0	0	0	0	0	0	0	0	0	p__Sarcomastigophora	g__Neobodo	s__Neobodo_designis
ASV5057	0	0	0	0	0	0	0	0	0	0	0	0	0	0	0	0	0	0	0	0	0	0	0	22	0	17	0	0	0	0	0	0	0	0	0	0	0	0	0	p__Rotifera	g__Dicranophorus	s__Dicranophorus_forcipatus
ASV5055	0	0	0	0	0	0	0	0	0	0	0	0	0	0	0	0	0	0	0	0	14	0	0	0	0	0	25	0	0	0	0	0	0	0	0	0	0	0	0	p__Sarcomastigophora	g__Neobodo	s__Neobodo_designis
ASV5053	0	0	0	0	0	0	0	0	0	0	0	0	0	0	0	0	0	0	0	0	26	0	0	0	0	13	0	0	0	0	0	0	0	0	0	0	0	0	0	p__Ciliophora	g__Loxophyllum	s__Loxophyllum_utriculariae
ASV505	0	0	0	0	0	0	0	0	0	13	142	0	481	0	0	0	0	0	11	0	0	0	0	0	0	15	0	17	0	0	341	0	0	0	21	0	125	108	0	p__Bacillariophyta	g__Gomphonema	s__Gomphonema_parvulum
ASV5042	0	0	0	0	0	0	0	0	0	0	0	0	0	0	0	0	0	0	0	0	4	0	0	0	0	0	0	0	0	0	0	0	0	0	0	0	0	0	35	p__Apicomplexa	g__Leidyana	s__Leidyana_migrator
ASV5040	0	0	0	0	0	0	0	0	0	0	0	0	0	0	0	0	0	0	0	0	0	0	0	0	0	0	0	0	0	0	0	0	0	0	0	0	0	39	0	p__Apicomplexa	g__Gregarina	s__Gregarina_caledia
ASV5031	0	0	0	0	0	0	0	0	0	0	0	0	0	0	0	0	0	0	0	0	0	0	0	0	0	0	0	0	0	0	0	0	0	27	0	0	0	12	0	p__Ciliophora	g__Pseudonotohymena	s__Pseudonotohymena_antarctica
ASV503	0	133	288	0	0	0	90	31	0	174	0	0	0	0	0	0	0	0	200	0	46	0	31	49	24	42	37	34	8	0	84	0	0	0	0	0	0	6	0	p__Bacillariophyta	g__Synedra	s__Synedra_angustissima
ASV5025	0	0	0	0	0	0	0	0	0	0	0	0	0	0	0	0	0	0	0	0	0	0	0	0	0	0	0	0	0	12	8	0	0	0	13	0	6	0	0	p__Sarcomastigophora	g__Diplonema	s__Diplonema_papillatum
ASV5024	0	0	0	0	0	0	0	0	0	0	0	0	0	0	0	0	0	0	0	0	0	0	0	0	0	0	0	11	11	0	0	0	0	0	0	0	12	5	0	p__Chlorophyta	g__Chromochloris	s__Chromochloris_zofingiensis
ASV5018	0	0	0	0	0	0	35	0	0	0	0	0	0	0	0	0	0	0	0	0	0	0	0	0	0	0	0	0	0	0	0	0	0	0	4	0	0	0	0	p__Sarcomastigophora	g__Vannella	s__Vannella_miroides
ASV5015	0	0	39	0	0	0	0	0	0	0	0	0	0	0	0	0	0	0	0	0	0	0	0	0	0	0	0	0	0	0	0	0	0	0	0	0	0	0	0	p__Apicomplexa	g__Plasmodium	s__Plasmodium_ovale
ASV5013	0	39	0	0	0	0	0	0	0	0	0	0	0	0	0	0	0	0	0	0	0	0	0	0	0	0	0	0	0	0	0	0	0	0	0	0	0	0	0	p__Chlorophyta	g__Chlorella	s__Chlorella_variabilis
ASV5011	39	0	0	0	0	0	0	0	0	0	0	0	0	0	0	0	0	0	0	0	0	0	0	0	0	0	0	0	0	0	0	0	0	0	0	0	0	0	0	p__Bacillariophyta	g__Biddulphiopsis	s__Biddulphiopsis_titiana
ASV50	421	0	0	0	0	0	97	19	60	697	0	0	0	0	0	0	0	0	0	18	1503	42	608	590	706	648	518	574	14	1456	689	809	677	285	80	85	665	48	0	p__Cryptophyta	g__Goniomonas	s__Cryptomonas_paramecium
ASV4992	0	0	0	0	0	0	0	0	0	0	0	0	0	0	0	0	0	0	0	0	7	0	0	24	0	9	0	0	0	0	0	0	0	0	0	0	0	0	0	p__Chlorophyta	g__Cloniophora	s__Cloniophora_spicata
ASV4991	0	0	0	0	0	0	0	0	0	0	0	0	0	0	0	0	0	0	0	0	0	0	0	0	0	0	0	0	0	0	0	0	0	0	0	0	0	0	40	p__Ciliophora	g__Kleinstyla	s__Kleinstyla_dorsicirrata
ASV4989	0	0	0	0	0	0	0	0	0	0	0	0	0	0	0	0	0	0	0	0	0	0	0	0	0	0	0	0	0	0	0	0	0	0	0	0	7	0	33	p__Euglenophyta	g__Trachelomonas	s__Trachelomonas_oblonga
ASV4987	0	0	0	0	0	0	0	0	0	0	0	0	0	0	0	0	0	0	0	0	0	0	16	0	0	0	0	0	0	0	0	0	0	0	24	0	0	0	0	p__Ciliophora	g__Spathidium	s__Spathidium_stammeri
ASV4986	0	0	0	0	0	0	0	0	0	0	0	0	0	0	0	0	0	0	0	0	0	0	0	0	0	0	0	0	0	0	0	0	0	0	20	0	20	0	0	p__Chlorophyta	g__Rotundella	s__Rotundella_rotunda
ASV4981	0	0	0	0	0	0	0	0	0	0	0	0	0	0	0	0	0	0	0	0	28	0	0	0	0	0	0	0	0	0	12	0	0	0	0	0	0	0	0	p__Ciliophora	g__Euplotes	s__Euplotes_octocarinatus
ASV4976	0	0	0	0	0	0	0	0	0	0	0	0	0	0	0	0	0	0	0	0	0	0	0	0	0	0	0	0	0	10	30	0	0	0	0	0	0	0	0	p__Chlorophyta	g__Hapalochloris	s__Hapalochloris_nozakii
ASV497	0	0	0	0	201	0	53	12	99	293	0	0	0	0	192	0	154	0	91	0	0	0	0	0	0	0	5	0	0	8	60	41	0	0	0	0	29	0	53	p__Sarcomastigophora	g__Neobodo	s__Neobodo_designis
ASV4965	0	0	0	40	0	0	0	0	0	0	0	0	0	0	0	0	0	0	0	0	0	0	0	0	0	0	0	0	0	0	0	0	0	0	0	0	0	0	0	p__Rotifera	g__Dicranophorus	s__Dicranophorus_forcipatus
ASV4951	0	0	0	0	0	0	0	0	0	0	33	0	0	0	0	0	0	0	0	0	0	0	0	0	0	0	0	0	0	7	0	0	0	0	0	0	0	0	0	p__Sarcomastigophora	g__Dimastigella	s__Dimastigella_mimosa
ASV4947	0	0	0	0	0	0	0	0	0	16	0	0	0	0	0	0	0	0	0	0	0	0	0	0	0	0	0	7	0	17	0	0	0	0	0	0	0	0	0	p__Dinophyta	g__Prorocentrum	s__Prorocentrum_emarginatum
ASV4945	0	0	0	0	0	0	0	0	0	40	0	0	0	0	0	0	0	0	0	0	0	0	0	0	0	0	0	0	0	0	0	0	0	0	0	0	0	0	0	p__Sarcomastigophora	g__Angulamoeba	s__Angulamoeba_microcystivorans
ASV4932	0	0	0	0	0	0	0	0	0	0	0	0	0	0	0	0	0	0	0	0	0	13	0	0	0	0	0	0	0	0	28	0	0	0	0	0	0	0	0	p__Euglenophyta	g__Phacus	s__Phacus_orbicularis
ASV4925	0	0	0	0	0	41	0	0	0	0	0	0	0	0	0	0	0	0	0	0	0	0	0	0	0	0	0	0	0	0	0	0	0	0	0	0	0	0	0	p__Ciliophora	g__Bromeliophrya	s__Bromeliophrya_brasiliensis
ASV4921	0	0	41	0	0	0	0	0	0	0	0	0	0	0	0	0	0	0	0	0	0	0	0	0	0	0	0	0	0	0	0	0	0	0	0	0	0	0	0	p__Bacillariophyta	g__Skeletonema	s__Skeletonema_grevillei
ASV4916	0	0	0	0	0	0	0	0	0	0	0	0	0	0	0	21	0	0	0	0	0	0	0	0	0	0	0	0	0	0	0	0	0	0	0	0	20	0	0	p__Ciliophora	g__Pseudocyrtolophosis	s__Pseudocyrtolophosis_alpestris
ASV4905	0	0	0	0	0	0	0	0	0	0	0	0	0	0	0	0	0	0	0	0	0	0	0	0	23	12	0	0	0	0	0	0	0	0	0	0	0	7	0	p__Ciliophora	g__Furgasonia	s__Furgasonia_blochmanni
ASV4903	0	0	0	0	0	0	0	0	0	0	0	0	0	0	0	0	0	0	0	0	0	0	0	0	0	0	5	0	0	0	0	0	0	0	0	0	37	0	0	p__Sarcomastigophora	g__Salpingoeca	s__Salpingoeca_fusiformis
ASV4902	0	0	0	0	0	0	0	0	0	0	0	0	0	0	0	0	0	0	0	0	0	0	0	0	0	14	0	0	0	0	0	0	0	0	28	0	0	0	0	p__Chlorophyta	g__Chlamydomonas	s__Chlamydomonas_bacca
ASV49	1819	0	0	0	121	149	149	0	0	68	135	0	0	0	0	28	171	0	0	0	64	35	13	17	300	386	381	360	14	91	999	2273	2649	27	103	106	751	185	16	p__Cryptophyta	g__Plagioselmis	s__Plagioselmis_nannoplanctica
ASV4896	0	0	0	0	0	0	0	0	0	0	0	0	0	0	0	0	0	0	0	0	0	0	0	0	0	0	0	0	0	0	0	42	0	0	0	0	0	0	0	p__Ciliophora	g__Hemiophrys	s__Hemiophrys_procera
ASV4893	0	0	0	0	0	0	0	0	0	0	0	0	0	0	0	0	0	0	0	0	0	0	0	0	0	0	0	0	0	0	42	0	0	0	0	0	0	0	0	p__Rotifera	g__Abrochtha	s__Abrochtha_sonneborni
ASV4891	0	0	0	0	0	0	0	0	0	0	0	0	0	0	0	0	0	0	0	0	0	0	0	0	0	0	0	0	0	0	42	0	0	0	0	0	0	0	0	p__Apicomplexa	g__Ascogregarina	s__Ascogregarina_barretti
ASV489	0	0	0	0	0	0	0	0	0	0	0	0	0	0	0	0	0	0	0	0	226	0	236	392	166	215	84	0	0	0	0	0	0	0	0	0	0	0	0	p__Chlorophyta	g__Golenkinia	s__Golenkinia_brevispicula
ASV4882	0	0	0	0	0	0	0	0	0	0	0	0	0	0	0	0	0	0	0	0	0	0	0	0	10	0	12	15	0	0	0	5	0	0	0	0	0	0	0	p__Ciliophora	g__Placus	s__Placus_salinus
ASV4881	0	0	0	0	0	0	0	0	0	0	0	0	0	0	0	0	0	0	0	0	4	0	0	0	0	0	0	14	6	0	14	4	0	0	0	0	0	0	0	p__Euglenophyta	g__Euglena	s__Euglena_agilis
ASV4866	0	0	0	0	0	0	0	0	0	0	0	0	0	42	0	0	0	0	0	0	0	0	0	0	0	0	0	0	0	0	0	0	0	0	0	0	0	0	0	p__Sarcomastigophora	g__Corallomyxa	s__Corallomyxa_tenera
ASV4864	0	0	0	0	0	0	0	0	0	13	0	0	0	0	0	0	0	0	0	0	0	0	0	0	0	0	0	0	0	0	0	0	0	0	0	0	0	0	29	p__Chlorophyta	g__Chlamydomonas	s__Chlamydomonas_applanata
ASV4861	0	0	0	0	0	0	0	0	0	14	0	0	0	0	0	0	0	0	28	0	0	0	0	0	0	0	0	0	0	0	0	0	0	0	0	0	0	0	0	p__Cryptophyta	g__Hemiselmis	s__Hemiselmis_rufescens
ASV486	0	0	0	0	0	0	0	0	0	10	0	0	0	0	0	0	0	0	0	0	45	10	0	15	35	0	57	178	54	115	381	339	95	0	0	0	0	0	0	p__Chlorophyta	g__Chlorogonium	s__Chlorogonium_capillatum
ASV4858	0	0	0	0	0	0	6	0	0	36	0	0	0	0	0	0	0	0	0	0	0	0	0	0	0	0	0	0	0	0	0	0	0	0	0	0	0	0	0	p__Chrysophyta	g__Epipyxis	s__Epipyxis_aureus
ASV4856	0	0	0	0	0	0	0	0	0	0	0	0	0	0	0	0	0	0	0	0	0	0	0	0	0	21	22	0	0	0	0	0	0	0	0	0	0	0	0	p__Ciliophora	g__Spirostomum	s__Spirostomum_teres
ASV4853	0	0	0	0	0	0	0	0	0	0	0	0	0	0	0	0	0	0	0	0	0	0	0	20	0	23	0	0	0	0	0	0	0	0	0	0	0	0	0	p__Dinophyta	g__Peridiniopsis	s__Unruhdinium_kevei
ASV4852	0	0	0	0	0	0	0	0	0	0	0	0	0	0	0	0	0	0	0	0	0	0	0	15	0	23	5	0	0	0	0	0	0	0	0	0	0	0	0	p__Euglenophyta	g__Euglenaria	s__Euglenaria_clavata
ASV4846	0	0	0	0	0	0	0	0	0	0	0	0	0	0	0	0	0	0	0	0	0	12	0	0	0	0	0	0	0	0	0	0	0	0	0	0	0	18	13	p__Ciliophora	g__Holostichides	s__Holostichides_heterotypicus
ASV4844	0	0	0	0	0	0	0	0	0	0	0	0	0	0	0	0	0	0	0	0	0	0	0	0	0	0	0	0	0	0	0	0	0	0	0	0	29	14	0	p__Euglenophyta	g__Trachelomonas	s__Trachelomonas_bernardinensis
ASV4840	0	0	0	0	0	0	0	0	0	0	0	0	0	0	0	0	0	0	0	0	0	0	0	0	0	11	0	0	0	0	0	0	0	0	23	0	9	0	0	p__Chlorophyta	g__Coccomyxa	s__Coccomyxa_simplex
ASV4839	0	0	0	0	0	0	0	0	0	0	0	0	0	0	0	0	0	0	0	0	0	0	0	0	0	8	15	0	0	0	0	0	0	0	20	0	0	0	0	p__Rotifera	g__Proales	s__Proales_similis
ASV4838	0	0	0	0	0	0	0	0	0	0	0	0	0	0	0	0	0	0	0	0	0	0	0	0	0	0	0	0	0	0	0	0	0	43	0	0	0	0	0	p__Euglenophyta	g__Euglenaria	s__Euglenaria_clavata
ASV4832	0	0	0	0	0	0	0	0	0	0	0	0	0	0	0	0	0	0	0	0	0	0	0	0	0	0	0	18	0	0	0	0	0	25	0	0	0	0	0	p__Euglenophyta	g__Trachelomonas	s__Trachelomonas_similis
ASV4831	0	0	0	0	0	0	0	0	0	0	0	0	0	0	0	0	0	0	0	0	0	0	0	0	0	0	9	34	0	0	0	0	0	0	0	0	0	0	0	p__Chlorophyta	g__Pandorina	s__Pandorina_morum
ASV4829	0	0	0	0	0	0	18	0	0	0	0	0	0	0	0	0	0	0	0	0	0	0	0	0	14	0	0	0	0	11	0	0	0	0	0	0	0	0	0	p__Ciliophora	g__Australocirrus	s__Australocirrus_australis
ASV4827	0	0	0	0	0	0	26	0	0	0	0	0	0	0	0	0	0	0	0	0	0	0	0	0	0	7	0	0	0	10	0	0	0	0	0	0	0	0	0	p__Dinophyta	g__Yihiella	s__Yihiella_yeosuensis
ASV4826	0	0	0	0	0	43	0	0	0	0	0	0	0	0	0	0	0	0	0	0	0	0	0	0	0	0	0	0	0	0	0	0	0	0	0	0	0	0	0	p__Bacillariophyta	g__Skeletonema	s__Skeletonema_grevillei
ASV4822	0	0	0	26	0	0	0	7	0	0	0	0	0	0	0	0	0	0	0	0	0	0	0	0	0	0	0	0	0	0	3	0	0	0	0	0	5	2	0	p__Sarcomastigophora	g__Schizoplasmodium	s__Schizoplasmodium_cavostelioides
ASV4821	0	0	43	0	0	0	0	0	0	0	0	0	0	0	0	0	0	0	0	0	0	0	0	0	0	0	0	0	0	0	0	0	0	0	0	0	0	0	0	p__Bacillariophyta	g__Cymatopleura	s__Cymatopleura_solea
ASV4820	0	0	43	0	0	0	0	0	0	0	0	0	0	0	0	0	0	0	0	0	0	0	0	0	0	0	0	0	0	0	0	0	0	0	0	0	0	0	0	p__Chlorophyta	g__Micractinium	s__Micractinium_pusillum
ASV4819	24	0	0	0	0	0	0	0	0	0	0	0	0	0	0	0	0	0	0	0	19	0	0	0	0	0	0	0	0	0	0	0	0	0	0	0	0	0	0	p__Ciliophora	g__Diophrys	s__Diophrys_appendiculata
ASV480	0	0	0	0	0	0	0	29	0	61	0	0	0	0	0	0	0	0	0	357	40	0	57	265	37	70	62	353	0	0	25	0	0	0	0	0	0	0	0	p__Chlorophyta	g__Hafniomonas	s__Hafniomonas_montana
ASV48	0	0	0	0	0	0	0	0	0	0	0	0	0	0	0	0	0	0	0	866	99	70	0	95	241	444	983	1997	0	167	2414	2625	1393	12	0	0	0	20	0	p__Chlorophyta	g__Hafniomonas	s__Hafniomonas_reticulata
ASV4799	0	0	0	0	0	0	0	0	0	0	0	0	0	0	0	0	0	0	0	0	0	0	0	0	0	44	0	0	0	0	0	0	0	0	0	0	0	0	0	p__Rotifera	g__Collotheca	s__Collotheca_campanulata
ASV4796	0	0	0	0	0	0	0	0	0	0	0	0	0	0	0	0	0	0	0	0	13	0	0	0	12	0	19	0	0	0	0	0	0	0	0	0	0	0	0	p__Bacillariophyta	g__Thalassiosira	s__Thalassiosira_aestivalis
ASV4782	0	0	0	0	0	0	0	0	0	0	0	0	0	0	0	0	0	0	0	0	0	0	0	0	0	0	0	0	0	0	30	14	0	0	0	0	0	0	0	p__Sarcomastigophora	g__Korotnevella	s__Korotnevella_jeppesenii
ASV4780	0	0	0	0	0	0	0	0	0	0	0	0	0	0	0	0	0	0	0	0	0	21	0	0	0	0	0	0	0	23	0	0	0	0	0	0	0	0	0	p__Ciliophora	g__Bresslaua	s__Bresslaua_vorax
ASV4776	0	0	0	0	0	0	0	0	0	0	0	0	0	0	0	0	0	0	0	0	0	9	0	0	0	0	4	14	0	0	0	5	0	0	0	0	12	0	0	p__Sarcomastigophora	g__Arcella	s__Arcella_hemisphaerica
ASV4772	0	0	0	0	0	0	27	0	0	0	0	0	0	0	0	0	0	0	0	0	0	0	0	0	0	0	0	0	0	0	0	8	0	0	0	0	9	0	0	p__Sarcomastigophora	g__Salpingoeca	s__Salpingoeca_urceolata
ASV4761	0	0	0	0	0	0	0	0	0	12	0	0	0	0	32	0	0	0	0	0	0	0	0	0	0	0	0	0	0	0	0	0	0	0	0	0	0	0	0	p__Chlorophyta	g__Hegewaldia	s__Hegewaldia_parvula
ASV4759	0	0	0	0	0	0	0	0	0	27	0	0	0	0	0	0	0	0	0	0	0	0	0	0	0	0	0	9	0	0	0	4	0	0	0	0	0	4	0	p__Chlorophyta	g__Polytomella	s__Polytomella_capuana
ASV4755	0	0	0	0	0	0	0	0	0	44	0	0	0	0	0	0	0	0	0	0	0	0	0	0	0	0	0	0	0	0	0	0	0	0	0	0	0	0	0	p__Ciliophora	g__Deviata	s__Deviata_parabacilliformis
ASV4738	0	0	0	0	0	0	0	0	0	0	0	0	0	0	0	0	0	0	0	0	8	0	0	0	0	7	0	0	0	0	15	0	0	0	0	0	0	15	0	p__Euglenophyta	g__Lepocinclis	s__Lepocinclis_buetschlii
ASV4737	0	0	0	0	0	0	0	0	0	0	0	0	0	0	0	0	0	0	0	0	0	0	0	0	0	0	0	0	0	0	23	0	0	9	0	0	13	0	0	p__Chlorophyta	g__Botryosphaerella	s__Botryosphaerella_sudetica
ASV4735	0	0	0	0	0	0	0	0	0	0	0	0	0	0	0	0	0	0	0	0	10	0	0	0	0	0	0	0	0	10	0	0	0	0	0	0	16	0	9	p__Apicomplexa	g__Cryptosporidium	s__Cryptosporidium_muris
ASV4734	0	0	0	0	0	0	0	0	0	0	0	0	0	0	0	0	0	0	0	0	0	0	0	0	0	0	0	0	0	27	0	0	0	0	0	0	0	0	18	p__Ciliophora	g__Plagiopyliella	s__Plagiopyliella_pacifica
ASV4732	0	0	0	0	0	0	0	0	0	0	0	0	0	0	0	0	0	0	0	0	0	0	0	0	0	0	19	26	0	0	0	0	0	0	0	0	0	0	0	p__Bacillariophyta	g__Thalassiosira	s__Thalassiosira_minima
ASV4731	0	0	0	0	0	0	0	0	0	0	0	0	0	0	0	0	0	0	0	0	4	0	0	0	0	0	0	9	0	0	0	13	0	0	0	0	0	0	19	p__Sarcomastigophora	g__Raperostelium	s__Raperostelium_ohioense
ASV4723	0	0	45	0	0	0	0	0	0	0	0	0	0	0	0	0	0	0	0	0	0	0	0	0	0	0	0	0	0	0	0	0	0	0	0	0	0	0	0	p__Apicomplexa	g__Plasmodium	s__Plasmodium_ovale
ASV4719	45	0	0	0	0	0	0	0	0	0	0	0	0	0	0	0	0	0	0	0	0	0	0	0	0	0	0	0	0	0	0	0	0	0	0	0	0	0	0	p__Cryptophyta	g__Plagioselmis	s__Plagioselmis_nannoplanctica
ASV4713	0	0	0	0	0	0	0	0	0	0	0	0	0	0	0	0	45	0	0	0	0	0	0	0	0	0	0	0	0	0	0	0	0	0	0	0	0	0	0	p__Ciliophora	g__Agolohymena	s__Agolohymena_aspidocauda
ASV4708	0	0	0	0	0	0	0	34	0	11	0	0	0	0	0	0	0	0	0	0	0	0	0	0	0	0	0	0	0	0	0	0	0	0	0	0	0	0	0	p__Chrysophyta	g__Chrysamoeba	s__Chrysamoeba_mikrokonta
ASV4704	0	0	0	0	0	0	0	0	0	45	0	0	0	0	0	0	0	0	0	0	0	0	0	0	0	0	0	0	0	0	0	0	0	0	0	0	0	0	0	p__Bacillariophyta	g__Sellaphora	s__Sellaphora_bacillum
ASV47	0	0	0	0	0	0	0	0	0	0	0	0	0	0	0	0	0	0	0	0	0	0	0	17	22	58	44	25	0	0	0	0	0	0	44	17	7582	4014	0	p__Chlorophyta	g__Tetracystis	s__Tetracystis_pampae
ASV4699	0	0	0	0	0	0	0	0	0	0	0	0	0	0	0	0	0	0	0	0	16	0	0	0	0	21	0	0	0	0	0	0	0	0	0	0	0	9	0	p__Chlorophyta	g__Coelastrum	s__Coelastrum_astroideum
ASV4695	0	0	0	0	0	0	0	0	0	0	0	0	0	0	0	0	0	0	0	0	0	0	0	0	0	6	0	0	0	0	0	0	0	0	0	8	20	12	0	p__Chlorophyta	g__Tumidella	s__Tumidella_tumida
ASV4686	0	0	0	0	0	0	0	0	0	0	0	0	0	0	0	0	0	0	0	0	0	0	9	12	0	0	0	18	0	0	7	0	0	0	0	0	0	0	0	p__Chlorophyta	g__Gloeotilopsis	s__Gloeotilopsis_planctonica
ASV4685	0	0	0	0	0	0	0	46	0	0	0	0	0	0	0	0	0	0	0	0	0	0	0	0	0	0	0	0	0	0	0	0	0	0	0	0	0	0	0	p__Sarcomastigophora	g__Monosiga	s__Monosiga_ovata
ASV4681	0	0	46	0	0	0	0	0	0	0	0	0	0	0	0	0	0	0	0	0	0	0	0	0	0	0	0	0	0	0	0	0	0	0	0	0	0	0	0	p__Ciliophora	g__Acineta	s__Acineta_tuberosa
ASV4680	0	46	0	0	0	0	0	0	0	0	0	0	0	0	0	0	0	0	0	0	0	0	0	0	0	0	0	0	0	0	0	0	0	0	0	0	0	0	0	p__Arthropoda	g__Macrocyclops	s__Macrocyclops_albidus
ASV468	0	723	270	22	0	75	275	18	0	0	0	0	0	0	0	0	0	0	0	0	0	0	0	0	4	0	0	0	0	16	0	0	0	0	0	0	0	0	0	p__Chlorophyta	g__Vitreochlamys	s__Vitreochlamys_aulata
ASV4674	0	0	0	0	0	0	0	0	0	0	0	0	0	0	0	46	0	0	0	0	0	0	0	0	0	0	0	0	0	0	0	0	0	0	0	0	0	0	0	p__Bacillariophyta	g__Navicula	s__Navicula_cari
ASV466	0	0	501	0	0	0	23	0	0	0	0	0	0	0	0	0	288	0	104	0	0	0	0	63	16	57	43	0	10	40	64	83	7	0	0	26	51	0	28	p__Ciliophora	g__Parallelostrombidium	s__Parallelostrombidium_ellipticum
ASV4658	0	0	0	0	0	0	0	0	0	0	0	0	0	0	0	0	0	0	0	0	0	47	0	0	0	0	0	0	0	0	0	0	0	0	0	0	0	0	0	p__Chlorophyta	g__Colemanosphaera	s__Colemanosphaera_charkowiensis
ASV465	0	0	0	0	0	116	0	0	0	0	241	0	0	0	0	0	0	0	0	0	29	0	0	198	223	265	187	0	0	78	27	40	0	0	0	0	0	0	0	p__Rotifera	g__Brachionus	s__Brachionus_calyciflorus
ASV4649	0	0	0	0	0	0	0	0	0	0	0	0	0	0	0	0	0	0	0	0	0	0	0	0	0	0	0	0	0	0	9	0	0	0	0	0	0	9	29	p__Chlorophyta	g__Bracteacoccus	s__Bracteacoccus_aggregatus
ASV4641	0	0	0	0	0	0	13	0	0	0	0	0	0	0	0	0	0	0	0	0	0	0	0	0	17	0	0	0	0	0	0	0	0	8	9	0	0	0	0	p__Dinophyta	g__Blastodinium	s__Blastodinium_spinulosum
ASV4620	0	0	0	0	0	0	0	0	0	0	0	0	0	0	0	0	0	0	0	0	0	0	0	0	0	0	0	0	0	0	0	0	0	0	0	0	0	8	40	p__Bacillariophyta	g__Rhopalodia	s__Rhopalodia_gibba
ASV4616	0	0	0	0	0	0	0	0	0	0	0	0	0	0	0	0	0	0	0	0	0	0	0	0	27	0	8	0	0	0	0	0	0	0	13	0	0	0	0	p__Ciliophora	g__Leprotintinnus	s__Leprotintinnus_nordqvisti
ASV4610	0	0	0	0	0	0	0	0	0	0	0	0	0	0	0	0	0	0	0	0	0	19	0	0	0	0	0	8	0	0	0	0	0	8	0	0	0	6	7	p__Apicomplexa	g__Isospora	s__Isospora_robini
ASV4606	0	0	0	0	0	48	0	0	0	0	0	0	0	0	0	0	0	0	0	0	0	0	0	0	0	0	0	0	0	0	0	0	0	0	0	0	0	0	0	p__Bacillariophyta	g__Nitzschia	s__Nitzschia_thermalis
ASV4605	0	0	0	0	0	48	0	0	0	0	0	0	0	0	0	0	0	0	0	0	0	0	0	0	0	0	0	0	0	0	0	0	0	0	0	0	0	0	0	p__Chlorophyta	g__Monactinus	s__Monactinus_sturmii
ASV4601	0	0	0	0	0	0	16	0	0	0	0	0	0	0	0	0	0	0	28	0	0	0	0	0	0	0	0	0	0	0	2	0	0	0	0	0	0	2	0	p__Sarcomastigophora	g__Entamoeba	s__Entamoeba_equi
ASV460	0	0	0	0	0	0	0	0	0	0	0	0	0	0	0	0	0	0	0	0	39	5	27	25	110	93	111	0	0	33	10	0	0	0	91	873	0	0	0	p__Dinophyta	g__Prorocentrum	s__Prorocentrum_minimum
ASV4581	0	0	0	0	0	0	0	0	0	0	0	0	0	0	0	0	0	0	0	0	0	0	0	23	0	11	0	0	0	0	8	7	0	0	0	0	0	0	0	p__Chlorophyta	g__Nannochloris	s__Nannochloris_bacillaris
ASV458	0	0	0	0	0	57	910	0	0	39	0	0	0	0	0	0	0	0	0	4	0	0	0	15	0	0	0	0	0	0	6	0	393	0	0	0	0	0	0	p__Ciliophora	g__Pseudocyrtolophosis	s__Pseudocyrtolophosis_alpestris
ASV4569	49	0	0	0	0	0	0	0	0	0	0	0	0	0	0	0	0	0	0	0	0	0	0	0	0	0	0	0	0	0	0	0	0	0	0	0	0	0	0	p__Rotifera	g__Conochilus	s__Conochilus_coenobasis
ASV4566	0	0	0	0	0	0	0	0	0	0	0	0	0	0	0	0	49	0	0	0	0	0	0	0	0	0	0	0	0	0	0	0	0	0	0	0	0	0	0	p__Bacillariophyta	g__Gomphonema	s__Gomphonema_parvulum
ASV4565	0	0	0	0	0	0	0	0	0	0	0	0	0	0	0	0	49	0	0	0	0	0	0	0	0	0	0	0	0	0	0	0	0	0	0	0	0	0	0	p__Sarcomastigophora	g__Neobodo	s__Neobodo_designis
ASV4555	0	0	0	0	0	0	0	0	0	27	0	0	0	0	0	0	0	0	0	0	0	0	0	0	0	0	0	0	0	0	0	0	0	22	0	0	0	0	0	p__Euglenophyta	g__Euglena	s__Euglena_tristella
ASV4552	0	0	0	0	0	0	0	0	49	0	0	0	0	0	0	0	0	0	0	0	0	0	0	0	0	0	0	0	0	0	0	0	0	0	0	0	0	0	0	p__Bacillariophyta	g__Synedra	s__Synedra_angustissima
ASV4549	0	0	0	0	0	0	0	0	0	0	0	0	0	0	0	0	0	0	0	0	0	0	0	9	13	13	15	0	0	0	0	0	0	0	0	0	0	0	0	p__Chlorophyta	g__Chloromonas	s__Chloromonas_vernalis
ASV4548	0	0	0	0	0	0	0	0	0	0	0	0	0	0	0	0	0	0	0	0	6	0	0	0	11	19	14	0	0	0	0	0	0	0	0	0	0	0	0	p__Rhodophyta	g__Porphyridium	s__Porphyridium_aerugineum
ASV4547	0	0	0	0	0	0	0	0	0	0	0	0	0	0	0	0	0	0	0	0	12	0	0	11	14	13	0	0	0	0	0	0	0	0	0	0	0	0	0	p__Bacillariophyta	g__Thalassiosira	s__Thalassiosira_tenera
ASV4533	0	0	0	0	0	0	0	0	0	0	0	0	0	0	0	0	0	0	0	0	0	0	0	0	0	0	0	0	0	0	50	0	0	0	0	0	0	0	0	p__Chlorophyta	g__Pseudomuriella	s__Pseudomuriella_schumacherensis
ASV4531	0	0	0	0	0	0	0	0	0	0	0	0	0	0	0	0	0	0	0	0	0	0	0	0	0	6	0	0	0	44	0	0	0	0	0	0	0	0	0	p__Ciliophora	g__Tintinnidium	s__Tintinnidium_primitivum
ASV4530	0	0	0	0	0	0	0	0	0	0	0	0	0	0	0	0	0	0	0	0	0	0	0	0	0	0	0	50	0	0	0	0	0	0	0	0	0	0	0	p__Ciliophora	g__Parallelostrombidium	s__Parallelostrombidium_paralatum
ASV4519	0	0	0	0	0	0	0	0	0	0	0	0	0	0	50	0	0	0	0	0	0	0	0	0	0	0	0	0	0	0	0	0	0	0	0	0	0	0	0	p__Sarcomastigophora	g__Arcella	s__Arcella_hemisphaerica
ASV4501	0	0	0	0	0	0	0	0	0	0	0	0	0	0	0	0	0	0	0	0	0	0	0	0	0	5	0	0	0	0	0	0	0	0	0	0	26	0	20	p__Rhodophyta	g__Galdieria	s__Galdieria_sulphuraria
ASV4492	0	0	0	0	0	0	0	0	0	0	0	0	0	0	0	0	0	0	0	0	11	0	0	0	0	26	0	6	0	0	0	0	0	0	0	0	0	0	8	p__Chlorophyta	g__Chlamydomonas	s__Chlamydomonas_bacca
ASV4491	0	0	0	0	0	0	0	24	0	0	0	0	0	0	0	0	0	0	0	0	0	0	0	0	0	0	0	0	0	0	0	0	0	0	0	0	0	27	0	p__Chlorophyta	g__Deasonia	s__Deasonia_prolifera
ASV4488	0	0	0	0	0	0	51	0	0	0	0	0	0	0	0	0	0	0	0	0	0	0	0	0	0	0	0	0	0	0	0	0	0	0	0	0	0	0	0	p__Phaeophyta	g__Distromium	s__Distromium_decumbens
ASV4481	0	0	0	0	0	0	0	0	0	0	0	0	0	0	0	51	0	0	0	0	0	0	0	0	0	0	0	0	0	0	0	0	0	0	0	0	0	0	0	p__Sarcomastigophora	g__Raperostelium	s__Raperostelium_ohioense
ASV4479	0	0	0	0	0	0	40	0	0	11	0	0	0	0	0	0	0	0	0	0	0	0	0	0	0	0	0	0	0	0	0	0	0	0	0	0	0	0	0	p__Ciliophora	g__Trichodina	s__Trichodina_meretricis
ASV4473	0	0	0	0	0	0	0	0	0	0	0	0	0	0	0	0	0	0	0	0	0	0	0	18	0	0	34	0	0	0	0	0	0	0	0	0	0	0	0	p__Bacillariophyta	g__Cyclotella	s__Cyclotella_scaldensis
ASV4470	0	0	0	0	0	0	0	0	0	0	0	0	0	0	0	0	0	0	0	0	0	0	0	0	0	0	0	0	0	0	0	0	0	0	0	0	0	0	52	p__Dinophyta	g__Peridinium	s__Peridinium_volzii
ASV447	0	0	0	0	0	0	0	0	0	0	0	0	1423	0	0	0	0	0	0	0	0	0	10	0	0	0	0	0	0	0	0	19	8	0	0	0	0	0	0	p__Ciliophora	g__Stylonychia	s__Stylonychia_ammermanni
ASV446	0	426	331	99	0	0	40	19	72	7	0	0	0	0	0	0	0	0	0	0	22	10	49	53	15	39	38	19	0	0	23	10	0	0	73	0	53	34	34	p__Chlorophyta	g__Caespitella	s__Caespitella_pascheri
ASV4458	0	0	0	0	0	0	0	0	0	0	0	0	0	0	0	0	0	0	0	0	0	0	0	0	0	0	25	27	0	0	0	0	0	0	0	0	0	0	0	p__Chlorophyta	g__Chlorella	s__Chlorella_stigmatophora
ASV4452	0	52	0	0	0	0	0	0	0	0	0	0	0	0	0	0	0	0	0	0	0	0	0	0	0	0	0	0	0	0	0	0	0	0	0	0	0	0	0	p__Bacillariophyta	g__Amphora	s__Amphora_coffeiformis
ASV4450	52	0	0	0	0	0	0	0	0	0	0	0	0	0	0	0	0	0	0	0	0	0	0	0	0	0	0	0	0	0	0	0	0	0	0	0	0	0	0	p__Chrysophyta	g__Tessellaria	s__Tessellaria_volvocina
ASV4446	0	0	0	0	0	0	0	0	0	52	0	0	0	0	0	0	0	0	0	0	0	0	0	0	0	0	0	0	0	0	0	0	0	0	0	0	0	0	0	p__Chlorophyta	g__Chara	s__Chara_vulgaris
ASV4436	0	0	0	0	0	0	0	0	0	0	0	0	0	0	0	0	0	0	0	0	0	0	0	0	0	0	0	0	0	0	0	0	0	0	0	53	0	0	0	p__Ciliophora	g__Onychodromus	s__Onychodromus_grandis
ASV443	0	0	0	0	0	35	414	12	0	39	0	0	0	534	51	41	0	0	0	34	0	0	0	0	0	26	237	0	0	0	36	0	0	0	0	0	19	0	0	p__Ciliophora	g__Stentor	s__Stentor_roeselii
ASV4429	0	0	0	0	0	0	0	0	0	0	0	0	0	0	0	0	0	0	0	0	0	0	4	0	0	6	0	0	0	0	23	11	0	0	9	0	0	0	0	p__Apicomplexa	g__Gregarina	s__Gregarina_ormierei
ASV442	0	0	0	0	0	149	1150	27	0	0	0	0	0	0	0	0	0	0	0	0	0	0	0	3	0	0	3	9	0	45	44	24	25	0	0	0	0	0	0	p__Dinophyta	g__Nusuttodinium	s__Nusuttodinium_acidotum
ASV4403	0	0	0	0	0	0	9	0	0	44	0	0	0	0	0	0	0	0	0	0	0	0	0	0	0	0	0	0	0	0	0	0	0	0	0	0	0	0	0	p__Bacillariophyta	g__Fragilariopsis	s__Fragilariopsis_doliolus
ASV4401	0	0	0	0	0	0	0	0	0	53	0	0	0	0	0	0	0	0	0	0	0	0	0	0	0	0	0	0	0	0	0	0	0	0	0	0	0	0	0	p__Haptophyta	g__Diacronema	s__Diacronema_vlkianum
ASV44	0	736	1376	205	216	283	529	101	2339	2196	0	155	188	769	0	75	0	0	68	0	0	16	15	0	0	0	0	16	0	0	1100	116	0	0	0	19	308	355	1752	p__Bacillariophyta	g__Cocconeis	s__Cocconeis_pediculus
ASV4395	0	0	0	0	0	0	0	0	0	0	0	0	0	0	0	0	0	0	0	0	0	0	0	0	0	0	0	0	0	0	0	0	0	0	0	0	54	0	0	p__Rotifera	g__Cephalodella	s__Cephalodella_gibba
ASV4394	0	0	0	0	0	0	0	0	0	0	0	0	0	0	0	0	0	0	0	0	0	0	0	0	0	0	0	0	0	0	0	0	0	0	7	0	19	0	28	p__Chlorophyta	g__Heterochlamydomonas	s__Heterochlamydomonas_inaequalis
ASV4390	0	0	0	0	0	0	0	0	0	0	0	0	0	0	0	0	0	0	0	0	0	0	0	0	0	0	0	0	0	0	30	0	0	0	0	0	0	0	24	p__Chlorophyta	g__Tetracystis	s__Tetracystis_pampae
ASV4389	0	0	0	0	0	0	0	0	0	0	0	0	0	0	0	0	0	0	0	0	23	0	0	0	0	0	0	0	0	0	31	0	0	0	0	0	0	0	0	p__Bacillariophyta	g__Nitzschia	s__Nitzschia_amphibia
ASV438	0	0	0	0	0	0	29	0	0	35	0	0	0	0	0	0	0	0	48	0	141	0	92	302	61	216	113	133	0	17	0	0	0	0	247	0	48	17	0	p__Chlorophyta	g__Spongiococcum	s__Spongiococcum_tetrasporum
ASV4376	0	0	0	0	0	46	0	0	0	0	0	0	0	0	0	0	0	0	0	0	8	0	0	0	0	0	0	0	0	0	0	0	0	0	0	0	0	0	0	p__Bacillariophyta	g__Cyclotella	s__Cyclotella_meneghiniana
ASV4373	0	0	0	45	0	0	0	0	0	0	0	0	0	0	0	0	0	0	9	0	0	0	0	0	0	0	0	0	0	0	0	0	0	0	0	0	0	0	0	p__Ciliophora	g__Orborhabdostyla	s__Orborhabdostyla_bromelicola
ASV4364	0	0	0	0	0	0	0	0	0	0	0	0	0	0	0	0	0	0	0	0	0	0	0	0	0	30	25	0	0	0	0	0	0	0	0	0	0	0	0	p__Ciliophora	g__Tetrahymena	s__Tetrahymena_empidokyrea
ASV4355	0	0	0	0	0	0	0	0	0	0	0	0	0	0	0	0	0	0	0	0	0	0	0	0	20	0	0	0	0	0	0	0	0	0	0	35	0	0	0	p__Chrysophyta	g__Chrysamoeba	s__Chrysamoeba_mikrokonta
ASV4351	0	0	0	0	0	0	0	0	0	0	0	0	0	0	0	0	0	0	0	0	0	0	0	0	6	7	0	0	0	0	0	0	0	0	25	0	0	0	17	p__Chlorophyta	g__Bracteacoccus	s__Bracteacoccus_bohemiensis
ASV4336	0	0	0	0	55	0	0	0	0	0	0	0	0	0	0	0	0	0	0	0	0	0	0	0	0	0	0	0	0	0	0	0	0	0	0	0	0	0	0	p__Chrysophyta	g__Poteriospumella	s__Poteriospumella_lacustris
ASV4325	0	0	0	0	0	0	6	8	0	0	0	0	0	0	29	0	0	0	0	0	7	0	0	0	0	0	0	0	5	0	0	0	0	0	0	0	0	0	0	p__Sarcomastigophora	g__Bodo	s__Bodo_saltans
ASV4322	0	0	0	0	0	0	0	0	0	0	55	0	0	0	0	0	0	0	0	0	0	0	0	0	0	0	0	0	0	0	0	0	0	0	0	0	0	0	0	p__Dinophyta	g__Unruhdinium	s__Unruhdinium_penardii
ASV4321	0	0	0	0	0	0	20	0	0	17	0	0	0	0	0	0	0	0	18	0	0	0	0	0	0	0	0	0	0	0	0	0	0	0	0	0	0	0	0	p__Ciliophora	g__Meseres	s__Meseres_corlissi
ASV4310	0	0	0	0	0	0	0	0	0	0	0	0	0	0	0	0	0	0	0	56	0	0	0	0	0	0	0	0	0	0	0	0	0	0	0	0	0	0	0	p__Dinophyta	g__Asulcocephalium	s__Asulcocephalium_miricentonis
ASV431	184	0	0	105	0	0	0	0	0	46	0	0	0	0	0	0	0	0	0	0	168	0	130	128	115	163	160	153	0	0	0	0	0	0	57	105	0	0	0	p__Cryptophyta	g__Goniomonas	s__Cryptomonas_pyrenoidifera
ASV4309	0	0	0	0	0	0	0	0	0	0	0	0	0	0	0	0	0	0	0	56	0	0	0	0	0	0	0	0	0	0	0	0	0	0	0	0	0	0	0	p__Euglenophyta	g__Euglenaria	s__Euglenaria_anabaena
ASV4306	0	0	0	0	0	0	0	0	0	0	0	0	0	0	0	0	0	0	0	0	0	0	0	0	0	0	0	0	0	0	0	0	0	0	0	0	11	12	33	p__Chlorophyta	g__Chlorochytrium	s__Chlorochytrium_lemnae
ASV43	0	0	0	0	0	0	0	0	0	29	0	0	0	0	0	0	0	0	0	0	307	0	130	340	315	989	762	409	77	135	0	0	0	0	9701	23	23	0	0	p__Chlorophyta	g__Yamagishiella	s__Yamagishiella_unicocca
ASV4291	0	0	0	0	0	0	0	0	0	0	0	0	0	0	0	0	0	0	56	0	0	0	0	0	0	0	0	0	0	0	0	0	0	0	0	0	0	0	0	p__Rhodophyta	g__Sheathia	s__Sheathia_boryana
ASV4288	0	0	0	0	0	0	0	0	0	0	0	0	0	0	56	0	0	0	0	0	0	0	0	0	0	0	0	0	0	0	0	0	0	0	0	0	0	0	0	p__Chlorophyta	g__Planktochlorella	s__Planktochlorella_nurekis
ASV4279	0	0	0	0	0	0	0	0	0	0	0	0	0	0	0	0	0	0	0	0	0	0	0	57	0	0	0	0	0	0	0	0	0	0	0	0	0	0	0	p__Xanthophyta	g__Gonyostomum	s__Gonyostomum_semen
ASV4274	0	0	0	0	0	0	0	0	0	0	0	0	0	0	0	0	0	0	0	0	23	0	0	0	0	0	0	0	0	0	0	0	0	0	0	0	34	0	0	p__Rotifera	g__Filinia	s__Filinia_longiseta
ASV4273	0	0	0	0	0	0	0	0	0	0	0	0	0	0	0	0	0	0	0	0	0	0	0	0	0	0	0	0	0	0	0	0	0	0	0	18	23	16	0	p__Bacillariophyta	g__Gyrosigma	s__Gyrosigma_acuminatum
ASV4267	0	0	0	0	0	0	0	0	0	0	0	0	0	0	0	0	0	0	0	0	0	0	0	0	0	0	0	0	0	0	13	13	0	0	0	0	31	0	0	p__Euglenophyta	g__Trachelomonas	s__Trachelomonas_hispida
ASV4263	0	0	0	0	0	0	0	24	0	0	0	0	0	0	0	0	0	0	0	0	6	0	0	0	0	7	0	0	0	0	0	0	0	0	20	0	0	0	0	p__Cryptophyta	g__Rhodomonas	s__Rhodomonas_salina
ASV4262	0	0	0	57	0	0	0	0	0	0	0	0	0	0	0	0	0	0	0	0	0	0	0	0	0	0	0	0	0	0	0	0	0	0	0	0	0	0	0	p__Chrysophyta	g__Paraphysomonas	s__Paraphysomonas_imperforata
ASV4260	0	57	0	0	0	0	0	0	0	0	0	0	0	0	0	0	0	0	0	0	0	0	0	0	0	0	0	0	0	0	0	0	0	0	0	0	0	0	0	p__Chlorophyta	g__Microglena	s__Microglena_monadina
ASV4258	0	0	0	0	0	0	0	0	0	0	0	0	0	0	0	0	57	0	0	0	0	0	0	0	0	0	0	0	0	0	0	0	0	0	0	0	0	0	0	p__Sarcomastigophora	g__Tetrapyle	s__Tetrapyle_octacantha
ASV4248	0	0	0	0	0	0	0	0	0	0	0	0	0	0	0	0	0	0	0	0	20	0	0	8	2	28	0	0	0	0	0	0	0	0	0	0	0	0	0	p__Euglenophyta	g__Phacus	s__Phacus_orbicularis
ASV4247	0	0	0	0	0	0	0	0	0	0	0	0	0	0	0	0	0	0	0	0	58	0	0	0	0	0	0	0	0	0	0	0	0	0	0	0	0	0	0	p__Rotifera	g__Collotheca	s__Collotheca_campanulata
ASV4246	0	0	0	0	0	0	0	0	0	0	0	0	0	0	0	0	0	0	0	58	0	0	0	0	0	0	0	0	0	0	0	0	0	0	0	0	0	0	0	p__Chlorophyta	g__Carteria	s__Carteria_lunzensis
ASV4241	0	0	0	0	0	0	0	0	0	0	0	0	0	0	0	0	0	0	0	0	7	0	8	0	7	9	0	0	0	0	0	0	0	0	27	0	0	0	0	p__Sarcomastigophora	g__Savillea	s__Savillea_micropora
ASV4239	0	0	0	0	0	0	0	0	0	0	0	0	0	0	0	0	0	0	0	0	0	26	5	0	0	18	0	0	0	0	9	0	0	0	0	0	0	0	0	p__Ciliophora	g__Holostichides	s__Holostichides_heterotypicus
ASV4238	0	0	0	0	0	0	0	0	0	0	0	0	0	0	0	0	0	0	0	0	0	0	0	0	0	0	0	0	0	0	31	27	0	0	0	0	0	0	0	p__Euglenophyta	g__Trachelomonas	s__Trachelomonas_intermedia
ASV4234	0	0	0	0	0	0	0	0	0	0	0	0	0	0	0	0	0	0	0	0	0	0	0	0	0	0	38	20	0	0	0	0	0	0	0	0	0	0	0	p__Ciliophora	g__Loxophyllum	s__Loxophyllum_utriculariae
ASV4233	0	0	0	0	0	0	0	0	0	0	0	0	0	0	0	0	0	0	0	0	0	0	0	0	0	0	0	15	0	0	28	0	15	0	0	0	0	0	0	p__Dinophyta	g__Protoceratium	s__Protoceratium_reticulatum
ASV4220	0	0	0	0	0	0	26	0	0	6	0	0	0	0	0	0	0	0	0	0	0	2	0	0	0	0	0	2	0	0	14	8	0	0	0	0	0	0	0	p__Euglenophyta	g__Phacus	s__Phacus_applanatus
ASV422	0	0	0	0	0	0	0	0	0	0	0	0	0	0	0	0	0	0	0	0	609	0	387	333	237	0	0	0	0	0	0	0	0	0	0	0	0	0	0	p__Chlorophyta	g__Westella	s__Westella_botryoides
ASV4214	0	0	0	0	0	0	0	0	0	0	0	0	0	0	0	0	0	0	0	0	21	0	0	20	0	18	0	0	0	0	0	0	0	0	0	0	0	0	0	p__Ciliophora	g__Dexiotricha	s__Dexiotricha_elliptica
ASV4213	0	0	0	0	0	0	0	0	0	0	0	0	0	0	0	0	0	0	0	59	0	0	0	0	0	0	0	0	0	0	0	0	0	0	0	0	0	0	0	p__Euglenophyta	g__Lepocinclis	s__Lepocinclis_playfairiana
ASV4208	0	0	0	0	0	0	0	0	0	0	0	0	0	0	0	0	0	0	0	0	0	0	0	0	0	0	0	0	0	0	0	0	0	5	24	0	30	0	0	p__Chlorophyta	g__Chlamydomonas	s__Chlamydomonas_moewusii
ASV4204	0	0	0	0	0	0	0	0	0	0	0	0	0	0	0	0	0	0	0	0	0	26	0	0	0	13	0	0	0	0	16	4	0	0	0	0	0	0	0	p__Ciliophora	g__Amphileptus	s__Amphileptus_bellus
ASV4203	0	0	0	0	0	0	0	0	0	0	0	0	0	0	0	0	0	0	0	0	0	0	0	0	0	0	6	0	0	20	0	0	0	0	14	0	0	19	0	p__Apicomplexa	g__Nematopsis	s__Nematopsis_temporariae
ASV4197	0	0	0	0	0	0	0	0	0	0	0	0	0	0	0	0	0	0	0	0	0	0	0	0	0	0	3	19	2	0	0	0	0	12	0	0	0	4	19	p__Apicomplexa	g__Prismatospora	s__Prismatospora_evansi
ASV4194	0	0	0	0	0	0	23	0	0	0	0	0	0	0	0	0	0	0	0	0	0	0	0	0	0	0	0	8	0	0	8	0	0	0	0	0	0	20	0	p__Ciliophora	g__Loxophyllum	s__Loxophyllum_rostratum
ASV419	0	0	0	902	0	0	324	88	0	0	0	0	0	0	0	0	0	0	0	0	0	0	0	0	0	0	204	0	68	0	0	0	0	0	0	0	0	0	0	p__Bacillariophyta	g__Thalassiosira	s__Thalassiosira_hendeyi
ASV4188	0	0	0	0	0	0	0	0	0	0	0	0	0	0	0	0	0	0	59	0	0	0	0	0	0	0	0	0	0	0	0	0	0	0	0	0	0	0	0	p__Cryptophyta	g__Hemiselmis	s__Hemiselmis_brunnescens
ASV4185	0	0	0	0	0	0	0	0	0	0	0	0	0	0	0	0	0	59	0	0	0	0	0	0	0	0	0	0	0	0	0	0	0	0	0	0	0	0	0	p__Sarcomastigophora	g__Parabodo	s__Parabodo_caudatus
ASV4183	0	0	0	0	0	0	0	0	0	0	0	0	0	0	59	0	0	0	0	0	0	0	0	0	0	0	0	0	0	0	0	0	0	0	0	0	0	0	0	p__Sarcomastigophora	g__Protostelium	s__Protostelium_mycophagum
ASV4175	0	0	0	0	0	0	0	0	0	0	0	0	59	0	0	0	0	0	0	0	0	0	0	0	0	0	0	0	0	0	0	0	0	0	0	0	0	0	0	p__Sarcomastigophora	g__Neobodo	s__Neobodo_designis
ASV4165	0	0	0	0	0	0	0	0	0	0	0	0	0	0	0	0	0	0	0	0	0	60	0	0	0	0	0	0	0	0	0	0	0	0	0	0	0	0	0	p__Ciliophora	g__Extraholosticha	s__Extraholosticha_sylvatica
ASV4163	0	0	0	0	0	0	0	0	0	0	0	0	0	0	0	0	0	0	0	60	0	0	0	0	0	0	0	0	0	0	0	0	0	0	0	0	0	0	0	p__Chlorophyta	g__Chlamydomonas	s__Chlamydomonas_reinhardtii
ASV416	0	0	0	0	0	0	0	0	0	0	0	0	0	0	0	0	0	0	0	0	85	0	97	162	218	27	95	48	0	34	134	139	21	345	4	0	92	19	77	p__Chrysophyta	g__Mallomonas	s__Mallomonas_papillosa
ASV4158	0	0	0	0	0	0	0	0	0	0	0	0	0	0	0	0	0	0	0	0	0	0	0	0	0	0	0	0	0	0	0	60	0	0	0	0	0	0	0	p__Euglenophyta	g__Trachelomonas	s__Trachelomonas_oblonga
ASV4156	0	0	0	0	0	0	0	0	0	0	0	0	0	0	0	0	0	0	0	0	0	0	0	0	0	32	0	0	0	0	28	0	0	0	0	0	0	0	0	p__Ciliophora	g__Protocyclidium	s__Protocyclidium_citrullus
ASV4150	0	0	0	0	0	0	0	0	0	0	0	0	0	0	0	0	0	0	0	0	0	0	0	0	0	6	0	0	0	54	0	0	0	0	0	0	0	0	0	p__Sarcomastigophora	g__Monosiga	s__Monosiga_ovata
ASV4149	0	0	0	0	0	0	0	0	0	0	0	0	0	0	0	0	0	0	0	0	0	0	0	0	0	0	0	17	0	0	43	0	0	0	0	0	0	0	0	p__Euglenophyta	g__Phacus	s__Phacus_pleuronectes
ASV4147	0	0	0	0	0	0	0	0	0	0	0	0	0	0	0	0	0	0	0	0	0	0	0	0	0	0	0	8	0	0	0	0	0	0	0	28	24	0	0	p__Apicomplexa	g__Gregarina	s__Gregarina_caledia
ASV4142	0	0	0	0	0	0	26	0	0	0	0	0	0	0	0	0	0	0	0	0	0	0	0	0	0	0	7	0	0	0	0	9	0	0	0	0	13	5	0	p__Xanthophyta	g__Gonyostomum	s__Gonyostomum_semen
ASV414	0	222	0	478	577	253	0	0	0	0	0	0	0	0	0	0	0	0	0	0	0	0	0	0	0	0	0	0	0	0	37	36	0	0	0	0	0	0	0	p__Bacillariophyta	g__Cylindrotheca	s__Cylindrotheca_closterium
ASV4130	0	0	0	0	0	0	0	0	0	60	0	0	0	0	0	0	0	0	0	0	0	0	0	0	0	0	0	0	0	0	0	0	0	0	0	0	0	0	0	p__Bacillariophyta	g__Melosira	s__Melosira_varians
ASV4123	0	0	0	0	0	0	0	0	0	0	0	0	0	0	0	0	0	0	0	0	0	0	0	0	0	0	0	0	0	0	24	0	0	0	0	0	27	10	0	p__Cryptophyta	g__Goniomonas	s__Cryptomonas_lundii
ASV4121	0	0	0	0	0	0	0	0	0	0	0	0	0	0	0	0	0	0	0	0	0	0	0	0	0	0	0	0	0	0	39	22	0	0	0	0	0	0	0	p__Ciliophora	g__Hemiophrys	s__Hemiophrys_procera
ASV4118	0	0	0	0	0	0	0	0	0	0	0	0	0	0	0	0	0	0	0	0	0	0	30	0	19	0	0	12	0	0	0	0	0	0	0	0	0	0	0	p__Sarcomastigophora	g__Angulamoeba	s__Angulamoeba_microcystivorans
ASV4117	0	0	0	0	0	0	0	0	0	0	0	0	0	0	0	0	0	0	0	0	32	0	0	0	0	0	17	12	0	0	0	0	0	0	0	0	0	0	0	p__Rotifera	g__Philodina	s__Philodina_megalotrocha
ASV4113	0	0	0	0	0	0	0	0	0	0	0	0	0	0	0	0	0	0	0	0	0	0	0	11	0	7	0	25	12	0	0	6	0	0	0	0	0	0	0	p__Euglenophyta	g__Euglena	s__Euglena_longa
ASV4101	0	0	0	0	0	0	0	0	0	0	0	0	0	0	0	0	0	0	61	0	0	0	0	0	0	0	0	0	0	0	0	0	0	0	0	0	0	0	0	p__Cryptophyta	g__Goniomonas	s__Goniomonas_truncata
ASV4099	0	0	0	0	0	0	0	0	0	0	0	0	0	0	0	0	0	61	0	0	0	0	0	0	0	0	0	0	0	0	0	0	0	0	0	0	0	0	0	p__Sarcomastigophora	g__Raperostelium	s__Raperostelium_ohioense
ASV4096	0	0	0	0	0	0	0	0	0	0	0	0	0	0	0	43	0	0	0	0	0	0	0	0	0	0	0	0	0	0	0	0	0	0	0	0	0	0	18	p__Chrysophyta	g__Synura	s__Synura_curtispina
ASV4095	0	0	0	0	0	0	0	0	0	0	0	0	0	0	0	41	0	0	0	0	0	0	0	0	0	0	0	0	0	0	0	0	0	0	0	0	0	0	20	p__Chlorophyta	g__Chlorococcum	s__Chlorococcum_echinozygotum
ASV4093	0	0	0	0	0	0	0	0	0	0	61	0	0	0	0	0	0	0	0	0	0	0	0	0	0	0	0	0	0	0	0	0	0	0	0	0	0	0	0	p__Ciliophora	g__Chilodonella	s__Chilodonella_uncinata
ASV409	0	0	0	0	0	70	11	0	0	0	159	0	0	0	0	0	0	0	0	0	24	0	17	40	37	51	57	93	10	15	168	43	0	0	126	29	562	101	6	p__Chlorophyta	g__Chlamydopodium	s__Chlamydopodium_vacuolatum
ASV4087	0	0	0	0	0	0	0	0	0	0	0	0	0	0	0	0	0	0	0	0	62	0	0	0	0	0	0	0	0	0	0	0	0	0	0	0	0	0	0	p__Bacillariophyta	g__Synedra	s__Synedra_angustissima
ASV4086	0	0	0	0	0	0	0	0	0	0	0	0	0	0	0	0	0	0	0	0	13	0	0	0	0	0	0	0	0	0	0	0	0	0	0	0	49	0	0	p__Ciliophora	g__Trimyema	s__Trimyema_compressum
ASV4084	0	0	0	0	0	0	0	0	0	0	0	0	0	0	0	0	0	0	0	0	0	0	0	0	0	0	0	0	0	0	0	12	0	50	0	0	0	0	0	p__Chlorophyta	g__Chlorococcum	s__Chlorococcum_echinozygotum
ASV4083	0	0	0	0	0	0	0	0	0	0	0	0	0	0	0	0	0	0	0	0	0	0	0	0	0	9	22	0	0	0	14	0	0	0	0	0	0	0	17	p__Ciliophora	g__Placus	s__Placus_salinus
ASV408	0	0	0	0	0	0	36	0	0	0	0	0	0	0	0	0	0	0	0	0	0	0	199	307	144	0	0	13	0	0	112	141	37	176	0	0	37	0	420	p__Ciliophora	g__Tintinnopsis	s__Tintinnopsis_lacustris
ASV4078	0	0	0	0	0	0	0	0	0	0	0	0	0	0	0	0	0	0	0	0	0	0	0	0	0	0	0	0	0	21	0	0	0	0	0	0	41	0	0	p__Bacillariophyta	g__Synedra	s__Synedra_angustissima
ASV4067	0	0	0	0	0	0	0	0	0	0	0	0	0	0	0	0	0	0	62	0	0	0	0	0	0	0	0	0	0	0	0	0	0	0	0	0	0	0	0	p__Chrysophyta	g__Hibberdia	s__Hibberdia_magna
ASV4063	0	0	0	0	0	0	0	0	0	0	0	0	0	0	0	43	0	0	19	0	0	0	0	0	0	0	0	0	0	0	0	0	0	0	0	0	0	0	0	p__Chrysophyta	g__Pedospumella	s__Pedospumella_encystans
ASV4060	0	0	0	12	0	0	0	0	0	50	0	0	0	0	0	0	0	0	0	0	0	0	0	0	0	0	0	0	0	0	0	0	0	0	0	0	0	0	0	p__Sarcomastigophora	g__Neobodo	s__Neobodo_designis
ASV406	0	0	0	0	0	0	0	0	39	182	0	0	1422	0	0	0	0	0	0	0	0	0	0	0	0	0	0	0	0	0	0	0	0	0	0	0	0	0	0	p__Bacillariophyta	g__Cyclotella	s__Cyclotella_meneghiniana
ASV4059	0	0	0	0	0	0	0	0	0	62	0	0	0	0	0	0	0	0	0	0	0	0	0	0	0	0	0	0	0	0	0	0	0	0	0	0	0	0	0	p__Sarcomastigophora	g__Stylochlamydium	s__Stylochlamydium_venustum
ASV4055	0	0	0	0	0	0	0	0	62	0	0	0	0	0	0	0	0	0	0	0	0	0	0	0	0	0	0	0	0	0	0	0	0	0	0	0	0	0	0	p__Sarcomastigophora	g__Korotnevella	s__Korotnevella_hemistylolepis
ASV4053	0	0	0	0	0	0	0	0	0	0	0	0	0	0	0	0	0	0	0	0	0	63	0	0	0	0	0	0	0	0	0	0	0	0	0	0	0	0	0	p__Bacillariophyta	g__Thalassiosira	s__Thalassiosira_lundiana
ASV404	0	0	0	0	0	0	0	0	0	26	0	0	0	0	0	0	0	0	19	0	127	0	103	82	123	134	173	75	56	101	61	88	0	0	92	41	99	89	159	p__Ciliophora	g__Cyclidium	s__Cyclidium_glaucoma
ASV4039	0	0	0	0	0	0	0	0	0	0	0	0	0	0	0	0	0	0	44	0	0	0	0	0	0	0	19	0	0	0	0	0	0	0	0	0	0	0	0	p__Ciliophora	g__Cyclidium	s__Cyclidium_glaucoma
ASV403	0	77	97	0	0	94	371	0	0	0	0	0	0	0	0	0	0	0	0	0	225	0	129	158	21	93	57	101	0	128	0	0	0	0	61	0	39	0	0	p__Ciliophora	g__Phascolodon	s__Phascolodon_vorticella
ASV4028	0	0	0	0	0	0	0	0	49	0	0	0	0	0	0	0	0	0	0	0	0	0	0	0	14	0	0	0	0	0	0	0	0	0	0	0	0	0	0	p__Chlorophyta	g__Pedinomonas	s__Pedinomonas_minor
ASV4025	0	0	0	0	0	0	0	0	0	0	0	0	0	0	0	0	0	0	0	0	19	0	0	19	13	0	0	0	0	0	0	0	0	0	0	0	13	0	0	p__Chlorophyta	g__Oocystella	s__Oocystella_oogama
ASV4021	0	0	0	0	0	0	0	0	0	0	0	0	0	0	0	0	0	0	0	0	0	0	0	0	0	0	0	0	0	0	0	0	0	0	0	0	64	0	0	p__Ciliophora	g__Perisincirra	s__Perisincirra_paucicirrata
ASV4015	0	0	0	0	0	0	0	0	0	0	0	0	0	0	0	0	0	0	0	0	0	0	0	0	0	0	0	0	0	0	25	0	0	0	0	0	12	27	0	p__Euglenophyta	g__Phacus	s__Phacus_limnophila
ASV4013	0	0	0	0	0	0	0	0	0	0	0	0	0	0	0	0	0	0	0	0	0	0	0	0	17	10	11	0	11	0	0	0	0	0	0	15	0	0	0	p__Chrysophyta	g__Epipyxis	s__Epipyxis_aureus
ASV401	0	96	0	0	0	0	0	19	0	75	128	0	203	262	0	0	825	0	0	0	0	0	0	0	0	0	0	0	0	0	0	0	0	0	0	0	46	0	0	p__Sarcomastigophora	g__Neobodo	s__Neobodo_designis
ASV4006	0	0	0	0	0	0	0	0	0	0	0	0	0	0	0	0	0	0	51	0	0	0	0	0	0	0	0	0	0	0	0	0	0	0	0	0	0	0	13	p__Sarcomastigophora	g__Pseudoparamoeba	s__Pseudoparamoeba_pagei
ASV3996	0	0	0	14	5	0	0	0	0	13	0	0	0	0	0	0	0	0	0	0	0	0	4	5	0	0	0	0	0	3	4	0	0	0	0	0	4	0	12	p__Rhodophyta	g__Antrocentrum	s__Antrocentrum_nigrescens
ASV3992	0	0	0	0	0	0	0	0	0	0	0	0	0	0	0	0	0	0	0	0	0	0	0	0	0	9	11	0	0	0	3	0	0	0	0	0	42	0	0	p__Chlorophyta	g__Atractomorpha	s__Atractomorpha_echinata
ASV3990	0	0	0	0	0	0	0	0	0	0	0	0	0	0	0	0	0	0	0	0	0	0	0	0	0	0	0	0	0	0	14	16	6	0	0	0	0	0	29	p__Arthropoda	g__Pandarus	s__Pandarus_smithi
ASV3988	0	0	0	0	0	0	0	23	0	0	0	0	0	0	0	0	0	0	0	0	0	0	0	0	0	0	16	26	0	0	0	0	0	0	0	0	0	0	0	p__Sarcomastigophora	g__Korotnevella	s__Korotnevella_jeppesenii
ASV3986	0	0	0	0	0	0	24	17	0	0	0	0	0	0	0	0	0	0	0	0	24	0	0	0	0	0	0	0	0	0	0	0	0	0	0	0	0	0	0	p__Sarcomastigophora	g__Parabodo	s__Parabodo_nitrophilus
ASV3982	0	0	65	0	0	0	0	0	0	0	0	0	0	0	0	0	0	0	0	0	0	0	0	0	0	0	0	0	0	0	0	0	0	0	0	0	0	0	0	p__Bacillariophyta	g__Fistulifera	s__Fistulifera_pelliculosa
ASV3978	0	0	0	0	0	0	0	0	0	0	0	0	0	0	0	0	0	0	65	0	0	0	0	0	0	0	0	0	0	0	0	0	0	0	0	0	0	0	0	p__Sarcomastigophora	g__Neobodo	s__Neobodo_designis
ASV3971	0	0	0	0	0	0	5	0	0	8	0	43	0	0	0	0	0	0	0	0	0	9	0	0	0	0	0	0	0	0	0	0	0	0	0	0	0	0	0	p__Sarcomastigophora	g__Raperostelium	s__Raperostelium_ohioense
ASV3967	0	0	0	0	0	0	0	0	0	0	0	0	0	0	0	0	0	0	0	0	0	0	66	0	0	0	0	0	0	0	0	0	0	0	0	0	0	0	0	p__Arthropoda	g__Macrocyclops	s__Macrocyclops_albidus
ASV3964	0	0	0	0	0	0	0	0	0	0	0	0	0	0	0	0	0	0	0	0	26	0	7	0	8	16	0	0	0	0	0	0	0	0	9	0	0	0	0	p__Ciliophora	g__Litonotus	s__Litonotus_paracygnus
ASV3961	0	0	0	0	0	0	0	0	0	0	0	0	0	0	0	0	0	0	0	0	0	0	0	0	0	0	0	0	0	0	13	0	0	0	16	0	11	14	12	p__Chlorophyta	g__Myrmecia	s__Myrmecia_israeliensis
ASV396	0	0	0	0	0	0	0	0	0	0	0	0	0	0	0	0	0	0	0	0	0	0	0	0	30	43	0	0	0	0	0	0	0	0	31	1573	0	0	0	p__Chrysophyta	g__Paraphysomonas	s__Paraphysomonas_imperforata
ASV3959	0	0	0	0	0	0	0	0	0	0	0	0	0	0	0	0	0	0	0	0	0	0	0	0	0	0	0	23	0	0	10	0	0	0	9	0	24	0	0	p__Ciliophora	g__Perisincirra	s__Perisincirra_paucicirrata
ASV3958	0	0	0	0	0	0	11	0	0	0	0	0	0	0	0	0	0	0	0	0	0	0	0	22	16	17	0	0	0	0	0	0	0	0	0	0	0	0	0	p__Chlorophyta	g__Rotundella	s__Rotundella_rotunda
ASV3949	0	0	0	0	0	0	0	0	0	0	0	66	0	0	0	0	0	0	0	0	0	0	0	0	0	0	0	0	0	0	0	0	0	0	0	0	0	0	0	p__Chrysophyta	g__Paraphysomonas	s__Paraphysomonas_imperforata
ASV3943	0	0	0	0	0	0	0	0	0	55	0	0	0	0	0	0	0	0	11	0	0	0	0	0	0	0	0	0	0	0	0	0	0	0	0	0	0	0	0	p__Chrysophyta	g__Chromulina	s__Chromulina_chionophila
ASV3942	0	0	0	0	0	0	0	0	66	0	0	0	0	0	0	0	0	0	0	0	0	0	0	0	0	0	0	0	0	0	0	0	0	0	0	0	0	0	0	p__Bacillariophyta	g__Rhopalodia	s__Rhopalodia_gibba
ASV3939	0	0	0	0	0	0	0	0	0	0	0	0	0	0	0	0	0	0	0	0	0	0	0	0	0	67	0	0	0	0	0	0	0	0	0	0	0	0	0	p__Rotifera	g__Adineta	s__Adineta_vaga
ASV3933	0	0	0	0	0	0	0	0	0	0	0	0	0	0	0	0	0	0	0	0	0	0	0	0	0	0	10	0	0	0	14	7	0	0	10	0	20	6	0	p__Chlorophyta	g__Choricystis	s__Choricystis_parasitica
ASV3923	0	20	0	0	0	0	0	0	0	0	0	0	0	0	0	0	0	0	0	0	0	0	0	0	0	0	0	0	0	0	25	0	0	0	0	0	0	0	22	p__Sarcomastigophora	g__Trypanosoma	s__Trypanosoma_kuseli
ASV3914	0	0	0	0	0	0	0	0	0	35	0	0	0	0	0	32	0	0	0	0	0	0	0	0	0	0	0	0	0	0	0	0	0	0	0	0	0	0	0	p__Chlorophyta	g__Chlamydomonas	s__Chlamydomonas_bacca
ASV3912	0	0	0	0	0	0	0	0	0	67	0	0	0	0	0	0	0	0	0	0	0	0	0	0	0	0	0	0	0	0	0	0	0	0	0	0	0	0	0	p__Sarcomastigophora	g__Endostelium	s__Endostelium_crystalliferum
ASV391	0	0	0	0	0	0	0	0	0	0	0	0	0	0	0	0	0	0	0	0	152	0	69	88	139	63	125	158	8	108	390	164	199	31	0	0	0	0	0	p__Bacillariophyta	g__Fragilariforma	s__Fragilariforma_virescens
ASV3902	0	0	0	0	0	0	0	0	0	0	0	0	0	0	0	0	0	0	0	0	0	0	0	0	0	0	0	0	0	0	0	0	0	0	0	0	38	30	0	p__Bacillariophyta	g__Thalassiosira	s__Thalassiosira_tenera
ASV3899	0	0	0	0	0	0	0	0	0	0	0	0	0	0	0	0	0	0	0	0	13	0	11	17	0	0	0	0	0	0	0	8	0	0	0	0	0	0	19	p__Bacillariophyta	g__Cymbella	s__Cymbella_cistuliformis
ASV3896	0	0	0	0	0	0	0	0	0	0	0	0	0	0	0	0	0	0	0	0	0	0	0	9	10	15	0	9	0	0	0	0	0	0	0	0	11	0	14	p__Chlorophyta	g__Chlamydomonas	s__Chlamydomonas_mexicana
ASV3893	0	0	0	0	0	68	0	0	0	0	0	0	0	0	0	0	0	0	0	0	0	0	0	0	0	0	0	0	0	0	0	0	0	0	0	0	0	0	0	p__Ciliophora	g__Chilodonella	s__Chilodonella_acuta
ASV3888	0	0	0	0	0	0	0	0	0	0	0	0	0	0	0	0	0	68	0	0	0	0	0	0	0	0	0	0	0	0	0	0	0	0	0	0	0	0	0	p__Chlorophyta	g__Chlorella	s__Chlorella_variabilis
ASV3884	0	0	0	0	0	0	0	0	0	0	0	0	0	0	68	0	0	0	0	0	0	0	0	0	0	0	0	0	0	0	0	0	0	0	0	0	0	0	0	p__Ciliophora	g__Cyclidium	s__Cyclidium_porcatum
ASV3878	0	0	0	0	0	0	0	0	0	49	0	0	0	0	19	0	0	0	0	0	0	0	0	0	0	0	0	0	0	0	0	0	0	0	0	0	0	0	0	p__Chrysophyta	g__Chromulina	s__Chromulina_chionophila
ASV3876	0	0	0	0	0	0	0	0	63	0	0	0	0	0	0	0	0	0	0	0	0	0	0	0	0	0	0	0	0	0	0	0	0	0	0	0	0	0	5	p__Xanthophyta	g__Botrydiopsis	s__Botrydiopsis_pyrenoidosa
ASV3873	0	0	0	0	0	0	0	0	0	0	0	0	0	0	0	0	0	0	0	0	0	0	12	0	0	29	28	0	0	0	0	0	0	0	0	0	0	0	0	p__Chlorophyta	g__Chlamydomonas	s__Chlamydomonas_raudensis
ASV3870	0	0	0	0	0	0	0	0	0	0	0	0	0	0	0	0	0	0	0	0	0	0	0	0	47	0	0	0	0	0	0	0	0	0	0	0	0	22	0	p__Dinophyta	g__Woloszynskia	s__Woloszynskia_leopoliensis
ASV387	0	895	0	0	0	0	20	0	0	0	0	0	0	0	0	0	0	0	0	0	44	51	50	126	81	115	299	14	0	32	0	0	0	0	0	0	0	0	0	p__Rotifera	g__Filinia	s__Filinia_longiseta
ASV3868	0	0	0	0	0	0	0	0	0	0	0	0	0	0	0	0	0	0	0	0	0	0	0	0	0	0	25	0	0	0	0	0	0	0	0	20	24	0	0	p__Sarcomastigophora	g__Parabodo	s__Parabodo_caudatus
ASV3857	0	0	0	0	0	69	0	0	0	0	0	0	0	0	0	0	0	0	0	0	0	0	0	0	0	0	0	0	0	0	0	0	0	0	0	0	0	0	0	p__Ciliophora	g__Oxytricha	s__Oxytricha_granulifera
ASV3855	0	0	0	69	0	0	0	0	0	0	0	0	0	0	0	0	0	0	0	0	0	0	0	0	0	0	0	0	0	0	0	0	0	0	0	0	0	0	0	p__Bacillariophyta	g__Thalassiosira	s__Thalassiosira_tenera
ASV3849	0	0	0	0	0	0	0	0	0	0	0	0	0	69	0	0	0	0	0	0	0	0	0	0	0	0	0	0	0	0	0	0	0	0	0	0	0	0	0	p__Sarcomastigophora	g__Neobodo	s__Neobodo_designis
ASV3846	0	0	0	0	0	0	13	0	0	56	0	0	0	0	0	0	0	0	0	0	0	0	0	0	0	0	0	0	0	0	0	0	0	0	0	0	0	0	0	p__Xanthophyta	g__Vaucheria	s__Vaucheria_bursata
ASV384	0	128	95	0	0	0	58	0	0	0	0	0	0	0	0	0	0	0	0	0	101	0	78	113	96	109	61	31	92	64	140	116	0	174	107	23	67	36	49	p__Chlorophyta	g__Nephrochlamys	s__Nephrochlamys_subsolitaria
ASV3839	0	0	0	0	0	0	0	0	0	0	0	0	0	0	0	0	0	0	0	0	0	0	0	0	0	0	0	0	0	0	5	0	0	0	0	0	3	7	55	p__Ciliophora	g__Protogastrostyla	s__Protogastrostyla_sterkii
ASV3836	0	0	0	70	0	0	0	0	0	0	0	0	0	0	0	0	0	0	0	0	0	0	0	0	0	0	0	0	0	0	0	0	0	0	0	0	0	0	0	p__Bacillariophyta	g__Sellaphora	s__Sellaphora_seminulum
ASV3821	0	0	0	0	0	0	0	0	0	0	0	0	0	0	0	0	0	0	0	0	0	0	0	0	0	0	0	0	0	0	0	0	0	0	0	0	51	20	0	p__Dinophyta	g__Paragymnodinium	s__Paragymnodinium_shiwhaense
ASV3816	0	0	0	0	0	0	0	0	0	0	0	0	0	0	0	0	0	0	0	0	0	0	0	0	0	36	0	0	0	35	0	0	0	0	0	0	0	0	0	p__Chlorophyta	g__Pandorina	s__Pandorina_morum
ASV3814	0	0	0	0	0	0	0	0	0	0	0	0	0	0	0	0	0	0	0	0	0	0	0	19	0	0	0	27	0	0	25	0	0	0	0	0	0	0	0	p__Chlorophyta	g__Chlorococcum	s__Chlorococcum_aquaticum
ASV3813	0	0	0	0	0	0	0	0	0	0	0	0	0	0	0	0	0	0	0	0	30	0	0	23	0	0	7	7	0	0	0	0	0	0	4	0	0	0	0	p__Chlorophyta	g__Aphanochaete	s__Aphanochaete_repens
ASV3812	0	0	0	0	0	71	0	0	0	0	0	0	0	0	0	0	0	0	0	0	0	0	0	0	0	0	0	0	0	0	0	0	0	0	0	0	0	0	0	p__Bacillariophyta	g__Thalassiosira	s__Thalassiosira_tenera
ASV381	0	112	347	103	0	0	0	18	482	53	0	0	0	0	0	87	146	0	53	0	0	14	0	4	7	19	9	0	0	29	62	34	0	13	17	16	32	31	68	p__Bacillariophyta	g__Surirella	s__Surirella_pinnata
ASV3809	0	0	21	0	0	0	3	0	0	0	0	0	0	0	0	0	0	0	0	0	0	0	0	2	0	0	0	0	0	0	13	8	0	0	0	0	24	0	0	p__Euglenophyta	g__Phacus	s__Phacus_trimarginatus
ASV3808	0	45	0	0	0	0	0	0	0	0	0	0	0	0	0	0	0	0	0	0	0	0	0	0	0	0	12	14	0	0	0	0	0	0	0	0	0	0	0	p__Chlorophyta	g__Oocystella	s__Oocystella_oogama
ASV3807	0	71	0	0	0	0	0	0	0	0	0	0	0	0	0	0	0	0	0	0	0	0	0	0	0	0	0	0	0	0	0	0	0	0	0	0	0	0	0	p__Arthropoda	g__Sinocalanus	s__Sinocalanus_sinensis
ASV3788	0	0	0	0	0	0	0	0	0	0	0	0	0	0	0	0	0	0	0	0	0	0	0	0	0	0	0	5	0	0	41	21	0	0	0	0	5	0	0	p__Euglenophyta	g__Euglena	s__Euglena_tristella
ASV3783	0	72	0	0	0	0	0	0	0	0	0	0	0	0	0	0	0	0	0	0	0	0	0	0	0	0	0	0	0	0	0	0	0	0	0	0	0	0	0	p__Bacillariophyta	g__Amphora	s__Amphora_coffeiformis
ASV3781	0	0	0	0	0	0	0	0	0	0	0	0	0	0	0	0	0	72	0	0	0	0	0	0	0	0	0	0	0	0	0	0	0	0	0	0	0	0	0	p__Arthropoda	g__Paracyclopina	s__Paracyclopina_nana
ASV378	0	599	0	0	0	74	41	0	0	0	0	0	240	0	0	0	0	0	0	0	31	0	23	25	0	0	0	31	0	26	470	32	0	53	0	0	0	15	114	p__Chlorophyta	g__Desmodesmus	s__Desmodesmus_armatus
ASV3770	0	0	0	0	0	0	0	0	0	0	0	0	0	0	0	0	0	0	0	0	33	0	0	0	0	40	0	0	0	0	0	0	0	0	0	0	0	0	0	p__Ciliophora	g__Urosoma	s__Urosoma_salmastra
ASV3769	0	0	0	0	0	0	0	0	0	0	0	0	0	0	0	0	0	0	0	0	0	0	0	0	0	0	0	0	0	0	0	0	0	0	0	0	0	0	73	p__Dinophyta	g__Apocalathium	s__Apocalathium_aciculiferum
ASV3766	0	0	0	0	0	0	0	0	0	0	0	0	0	0	0	0	0	0	0	0	24	0	0	0	0	0	0	0	0	0	0	0	25	0	0	0	24	0	0	p__Bacillariophyta	g__Nitzschia	s__Nitzschia_thermalis
ASV3765	0	0	0	0	0	0	0	0	0	0	0	0	0	0	0	0	0	0	0	0	17	0	0	12	23	0	14	0	0	0	0	7	0	0	0	0	0	0	0	p__Sarcomastigophora	g__Trypanosoma	s__Trypanosoma_varani
ASV376	0	0	0	0	0	0	0	0	0	0	0	0	0	0	0	0	0	0	0	0	72	0	33	64	38	103	94	173	0	63	359	217	433	65	12	0	61	0	0	p__Cryptophyta	g__Goniomonas	s__Cryptomonas_pyrenoidifera
ASV3757	0	0	0	73	0	0	0	0	0	0	0	0	0	0	0	0	0	0	0	0	0	0	0	0	0	0	0	0	0	0	0	0	0	0	0	0	0	0	0	p__Ciliophora	g__Vorticella	s__Vorticella_gracilis
ASV3755	0	73	0	0	0	0	0	0	0	0	0	0	0	0	0	0	0	0	0	0	0	0	0	0	0	0	0	0	0	0	0	0	0	0	0	0	0	0	0	p__Bacillariophyta	g__Thalassiosira	s__Thalassiosira_tenera
ASV3754	73	0	0	0	0	0	0	0	0	0	0	0	0	0	0	0	0	0	0	0	0	0	0	0	0	0	0	0	0	0	0	0	0	0	0	0	0	0	0	p__Chlorophyta	g__Mychonastes	s__Mychonastes_homosphaera
ASV3746	0	0	0	0	0	0	0	0	0	0	0	0	0	0	0	0	0	0	0	0	0	0	6	0	44	24	0	0	0	0	0	0	0	0	0	0	0	0	0	p__Chlorophyta	g__Uronema	s__Uronema_acuminatum
ASV3741	0	0	0	0	0	0	0	0	0	0	0	0	0	0	0	0	0	0	0	0	0	0	0	0	0	0	0	0	0	17	0	0	0	0	0	0	0	57	0	p__Ciliophora	g__Agolohymena	s__Agolohymena_aspidocauda
ASV3738	0	0	0	0	0	0	0	0	0	0	0	0	0	0	0	0	0	0	0	0	0	10	0	0	0	0	0	19	0	0	0	0	0	19	0	0	0	11	15	p__Ciliophora	g__Colpoda	s__Colpoda_inflata
ASV373	0	0	0	0	0	0	20	0	0	0	0	0	0	0	0	0	0	0	0	0	28	0	19	22	68	55	88	194	47	127	233	353	545	0	0	0	0	0	4	p__Chlorophyta	g__Tetracystis	s__Tetracystis_intermedia
ASV3724	0	0	0	0	0	0	0	0	0	0	0	0	0	0	70	0	0	0	0	0	0	0	0	0	0	0	0	0	0	0	0	0	0	0	0	0	0	4	0	p__Chlorophyta	g__Characium	s__Characium_saccatum
ASV3719	0	0	0	0	0	0	0	0	0	0	0	0	0	0	0	0	0	0	0	0	0	0	15	0	15	28	17	0	0	0	0	0	0	0	0	0	0	0	0	p__Chlorophyta	g__Actinochloris	s__Actinochloris_sphaerica
ASV3716	0	0	0	0	0	0	0	0	0	0	0	0	0	0	0	0	0	0	0	0	0	0	0	0	0	0	0	0	0	0	0	0	0	0	0	0	26	0	49	p__Sarcomastigophora	g__Neobodo	s__Neobodo_designis
ASV3712	0	0	0	0	0	0	0	0	0	0	0	0	0	0	0	0	0	0	0	0	0	0	0	0	0	0	0	0	0	0	0	0	0	75	0	0	0	0	0	p__Ciliophora	g__Levicoleps	s__Levicoleps_biwae
ASV3704	0	0	0	0	0	75	0	0	0	0	0	0	0	0	0	0	0	0	0	0	0	0	0	0	0	0	0	0	0	0	0	0	0	0	0	0	0	0	0	p__Bacillariophyta	g__Cocconeis	s__Cocconeis_pediculus
ASV370	0	0	0	0	0	0	0	0	0	495	0	0	0	0	0	0	0	0	0	0	119	0	64	76	92	132	178	122	0	0	43	14	0	221	44	28	145	40	0	p__Cryptophyta	g__Goniomonas	s__Cryptomonas_borealis
ASV37	0	224	242	66	144	0	102	0	270	107	876	0	4958	1500	434	280	367	0	109	0	0	0	53	89	0	131	64	58	0	158	755	141	0	217	68	65	1950	819	375	p__Bacillariophyta	g__Navicula	s__Navicula_cari
ASV3698	0	75	0	0	0	0	0	0	0	0	0	0	0	0	0	0	0	0	0	0	0	0	0	0	0	0	0	0	0	0	0	0	0	0	0	0	0	0	0	p__Bacillariophyta	g__Cocconeis	s__Cocconeis_pediculus
ASV3694	0	0	0	0	0	0	45	0	0	0	0	0	0	0	0	30	0	0	0	0	0	0	0	0	0	0	0	0	0	0	0	0	0	0	0	0	0	0	0	p__Haptophyta	g__Pavlova	s__Pavlova_gyrans
ASV3685	0	0	0	0	0	0	0	0	0	0	0	0	0	0	0	0	0	0	0	0	0	0	0	0	0	76	0	0	0	0	0	0	0	0	0	0	0	0	0	p__Rotifera	g__Lindia	s__Lindia_torulosa
ASV3679	0	0	0	0	0	0	0	0	0	0	0	0	0	0	0	0	0	0	0	0	0	0	0	0	0	0	0	0	0	0	0	18	58	0	0	0	0	0	0	p__Ciliophora	g__Lagynophrya	s__Lagynophrya_acuminata
ASV3674	0	0	0	0	0	0	0	0	0	0	0	0	0	0	0	0	0	0	0	0	0	0	0	0	0	0	0	0	0	76	0	0	0	0	0	0	0	0	0	p__Chlorophyta	g__Gonium	s__Gonium_pectorale
ASV3672	0	0	0	0	0	0	0	76	0	0	0	0	0	0	0	0	0	0	0	0	0	0	0	0	0	0	0	0	0	0	0	0	0	0	0	0	0	0	0	p__Rotifera	g__Filinia	s__Filinia_longiseta
ASV3661	0	0	0	0	0	0	0	0	0	19	0	0	0	0	0	0	0	0	0	0	0	0	0	0	0	0	0	0	0	57	0	0	0	0	0	0	0	0	0	p__Ciliophora	g__Phascolodon	s__Phascolodon_vorticella
ASV3660	0	0	0	0	0	0	0	0	0	11	0	0	0	0	0	0	0	0	0	0	12	0	0	30	0	23	0	0	0	0	0	0	0	0	0	0	0	0	0	p__Sarcomastigophora	g__Angulamoeba	s__Angulamoeba_microcystivorans
ASV3656	0	0	0	0	0	0	0	0	0	0	0	0	0	0	0	0	0	0	0	0	20	0	20	37	0	0	0	0	0	0	0	0	0	0	0	0	0	0	0	p__Cryptophyta	g__Falcomonas	s__Falcomonas_daucoides
ASV3654	0	0	0	0	0	0	0	0	0	0	0	0	0	0	0	0	0	0	0	0	0	0	0	0	0	0	0	0	0	0	0	0	0	0	0	0	39	11	27	p__Chlorophyta	g__Lobochlamys	s__Lobochlamys_culleus
ASV3653	0	0	0	0	0	0	0	0	0	0	0	0	0	0	0	0	0	0	0	0	9	0	20	14	12	5	4	0	0	0	0	0	0	0	8	0	5	0	0	p__Myxozoa	g__Zschokkella	s__Zschokkella_parasiluri
ASV3643	0	0	0	0	0	0	0	0	77	0	0	0	0	0	0	0	0	0	0	0	0	0	0	0	0	0	0	0	0	0	0	0	0	0	0	0	0	0	0	p__Arthropoda	g__Ceriodaphnia	s__Ceriodaphnia_dubia
ASV3640	0	0	0	0	0	0	0	0	0	0	0	0	0	0	0	0	0	0	0	0	0	78	0	0	0	0	0	0	0	0	0	0	0	0	0	0	0	0	0	p__Ciliophora	g__Stichotricha	s__Stichotricha_aculeata
ASV3635	0	0	0	0	0	0	0	0	0	0	0	0	0	0	0	0	0	0	0	0	0	0	0	0	42	0	0	0	0	0	36	0	0	0	0	0	0	0	0	p__Chlorophyta	g__Chlamydomonas	s__Chlamydomonas_incerta
ASV3628	39	0	0	0	0	0	0	0	0	0	0	0	0	0	0	0	0	0	0	0	23	0	0	0	16	0	0	0	0	0	0	0	0	0	0	0	0	0	0	p__Chlorophyta	g__Acutodesmus	s__Tetradesmus bajacalifornicus
ASV3617	0	33	0	0	0	0	0	0	0	45	0	0	0	0	0	0	0	0	0	0	0	0	0	0	0	0	0	0	0	0	0	0	0	0	0	0	0	0	0	p__Ciliophora	g__Lacrymaria	s__Lacrymaria_marina
ASV3614	0	0	0	0	0	0	0	0	0	0	0	0	0	0	0	0	0	0	0	0	0	0	0	24	0	13	0	0	0	0	0	0	0	0	42	0	0	0	0	p__Chlorophyta	g__Deasonia	s__Deasonia_multinucleata
ASV36	0	0	0	0	0	0	93	5247	87	0	399	0	0	441	0	11	118	0	0	0	1733	131	448	904	720	733	2171	53	0	0	52	134	0	0	177	0	0	818	548	p__Ciliophora	g__Paramecium	s__Paramecium_multimicronucleatum
ASV3598	0	0	0	0	0	58	0	0	0	0	0	0	0	0	0	21	0	0	0	0	0	0	0	0	0	0	0	0	0	0	0	0	0	0	0	0	0	0	0	p__Ciliophora	g__Histriculus	s__Histriculus_histrio
ASV3587	0	0	0	0	0	0	0	0	0	0	0	0	0	0	0	0	0	0	0	0	29	0	0	0	51	0	0	0	0	0	0	0	0	0	0	0	0	0	0	p__Ciliophora	g__Paramecium	s__Paramecium_caudatum
ASV3585	0	0	0	0	0	0	0	0	0	0	0	0	0	0	0	0	0	0	0	0	34	0	0	0	19	0	0	0	0	0	0	0	0	0	0	0	27	0	0	p__Ciliophora	g__Enchelys	s__Enchelys_polynucleata
ASV3582	0	0	0	0	0	0	0	0	0	0	0	0	0	0	0	0	0	0	0	0	0	0	17	0	0	9	19	12	0	0	23	0	0	0	0	0	0	0	0	p__Ciliophora	g__Trithigmostoma	s__Trithigmostoma_steini
ASV3581	0	0	0	0	0	0	0	0	0	0	0	0	0	0	0	0	0	0	0	0	31	0	0	0	0	0	0	21	0	0	0	0	0	0	0	0	28	0	0	p__Chlorophyta	g__Yamagishiella	s__Yamagishiella_unicocca
ASV3580	0	0	0	0	0	0	0	0	0	0	0	0	0	0	0	0	0	0	0	0	3	0	0	4	4	0	5	9	0	0	5	3	0	0	14	0	21	9	3	p__Cryptophyta	g__Goniomonas	s__Cryptomonas_gyropyrenoidosa
ASV358	0	0	0	0	0	0	0	0	0	0	0	0	0	0	0	0	0	0	0	249	191	0	92	149	64	219	171	153	55	32	153	110	0	0	0	50	130	26	0	p__Chlorophyta	g__Chlamydomonas	s__Chlamydomonas_reinhardtii
ASV3576	0	0	0	0	0	80	0	0	0	0	0	0	0	0	0	0	0	0	0	0	0	0	0	0	0	0	0	0	0	0	0	0	0	0	0	0	0	0	0	p__Ciliophora	g__Oxytricha	s__Oxytricha_granulifera
ASV3574	0	0	80	0	0	0	0	0	0	0	0	0	0	0	0	0	0	0	0	0	0	0	0	0	0	0	0	0	0	0	0	0	0	0	0	0	0	0	0	p__Dinophyta	g__Nusuttodinium	s__Nusuttodinium_acidotum
ASV3571	0	0	0	0	0	0	0	0	0	0	0	0	0	0	0	2	0	0	0	0	3	7	8	5	4	8	6	3	0	0	7	6	0	0	0	0	11	0	10	p__Rhodophyta	g__Compsopogon	s__Compsopogon_caeruleus
ASV3570	0	0	0	0	0	0	0	0	0	0	0	0	0	0	80	0	0	0	0	0	0	0	0	0	0	0	0	0	0	0	0	0	0	0	0	0	0	0	0	p__Bacillariophyta	g__Ulnaria	s__Ulnaria_delicatissima
ASV3560	0	0	0	0	0	0	0	0	0	0	0	0	0	0	0	0	0	0	0	0	0	0	0	0	0	0	0	17	0	0	14	17	0	8	0	0	4	11	10	p__Euglenophyta	g__Euglena	s__Euglena_agilis
ASV3557	0	0	0	0	0	0	5	0	0	0	0	0	0	0	0	0	0	0	0	0	8	12	0	0	2	0	0	0	0	0	3	0	0	0	0	0	25	0	26	p__Haptophyta	g__Pavlova	s__Pavlova_gyrans
ASV3552	0	0	0	0	0	0	0	0	0	0	0	0	0	0	0	0	0	0	21	0	0	0	0	0	0	0	0	0	0	16	21	0	0	0	0	0	23	0	0	p__Ciliophora	g__Tetrahymena	s__Tetrahymena_pigmentosa
ASV3548	0	0	0	0	0	0	0	0	0	0	0	0	0	0	0	16	0	0	0	0	0	0	0	0	0	0	0	0	0	0	0	0	0	29	0	0	15	0	21	p__Bacillariophyta	g__Sellaphora	s__Sellaphora_laevissima
ASV3540	0	0	0	0	0	0	0	0	0	0	0	0	0	0	0	0	0	0	0	0	0	38	5	5	0	0	0	0	0	0	0	0	0	14	0	0	20	0	0	p__Chlorophyta	g__Chloroidium	s__Chloroidium_saccharophilum
ASV3539	0	0	0	0	0	0	0	0	0	0	0	0	0	0	0	0	0	0	0	0	0	0	0	0	0	0	0	0	0	0	0	82	0	0	0	0	0	0	0	p__Ciliophora	g__Loxodes	s__Loxodes_striatus
ASV3525	0	0	0	0	0	0	0	0	0	0	0	0	0	0	0	0	82	0	0	0	0	0	0	0	0	0	0	0	0	0	0	0	0	0	0	0	0	0	0	p__Sarcomastigophora	g__Codosiga	s__Codosiga_hollandica
ASV3524	0	0	0	0	0	0	0	0	0	0	0	0	0	0	0	58	0	0	0	0	0	0	0	12	0	0	0	0	0	0	10	0	0	0	0	0	0	0	2	p__Chlorophyta	g__Bolbocoleon	s__Bolbocoleon_piliferum
ASV3519	0	0	0	0	0	0	0	11	0	13	0	0	0	0	0	0	0	0	0	0	0	0	0	0	0	0	0	58	0	0	0	0	0	0	0	0	0	0	0	p__Euglenophyta	g__Euglena	s__Euglena_agilis
ASV3514	0	0	0	0	0	0	0	0	0	0	0	0	0	0	0	0	0	0	0	0	0	0	0	0	0	0	3	0	0	0	21	11	0	7	0	0	0	0	41	p__Chlorophyta	g__Desmochloris	s__Desmochloris_mollenhaueri
ASV3508	0	0	0	0	0	66	0	0	0	0	0	0	0	0	0	0	0	0	0	0	0	0	0	0	0	0	0	0	0	0	0	0	0	0	0	0	17	0	0	p__Bacillariophyta	g__Nitzschia	s__Nitzschia_amphibia
ASV3505	0	83	0	0	0	0	0	0	0	0	0	0	0	0	0	0	0	0	0	0	0	0	0	0	0	0	0	0	0	0	0	0	0	0	0	0	0	0	0	p__Bacillariophyta	g__Campylodiscus	s__Campylodiscus_thuretii
ASV3504	61	0	0	0	0	22	0	0	0	0	0	0	0	0	0	0	0	0	0	0	0	0	0	0	0	0	0	0	0	0	0	0	0	0	0	0	0	0	0	p__Chrysophyta	g__Chromophyton	s__Chromophyton_vischeri
ASV3497	0	0	0	0	0	0	20	0	0	0	63	0	0	0	0	0	0	0	0	0	0	0	0	0	0	0	0	0	0	0	0	0	0	0	0	0	0	0	0	p__Chlorophyta	g__Arnoldiella	s__Arnoldiella_conchophila
ASV3490	0	0	0	0	0	0	0	0	0	0	0	0	0	0	0	0	0	0	0	0	0	0	0	0	0	0	0	0	0	0	0	0	0	0	0	0	0	0	84	p__Sarcomastigophora	g__Monosiga	s__Monosiga_ovata
ASV3483	0	0	0	0	0	0	0	0	0	0	0	0	0	0	0	0	0	0	0	0	0	0	0	0	31	0	0	0	14	0	11	17	0	0	0	0	0	11	0	p__Chlorophyta	g__Lagerheimia	s__Lagerheimia_genevensis
ASV348	0	0	0	73	0	184	0	26	0	0	0	0	0	0	0	0	0	0	51	0	21	0	21	34	61	37	82	0	1234	16	29	32	0	0	0	0	0	0	12	p__Chrysophyta	g__Mallomonas	s__Mallomonas_annulata
ASV3476	0	0	0	84	0	0	0	0	0	0	0	0	0	0	0	0	0	0	0	0	0	0	0	0	0	0	0	0	0	0	0	0	0	0	0	0	0	0	0	p__Dinophyta	g__Duboscquodinium	s__Duboscquodinium_collinii
ASV3475	0	0	84	0	0	0	0	0	0	0	0	0	0	0	0	0	0	0	0	0	0	0	0	0	0	0	0	0	0	0	0	0	0	0	0	0	0	0	0	p__Bacillariophyta	g__Cymatopleura	s__Cymatopleura_solea
ASV3471	0	0	0	0	0	0	0	0	0	0	0	0	0	0	0	0	61	0	0	0	0	0	0	0	0	0	0	0	0	0	0	23	0	0	0	0	0	0	0	p__Ciliophora	g__Levicoleps	s__Levicoleps_biwae
ASV3469	0	78	0	0	0	0	0	0	0	6	0	0	0	0	0	0	0	0	0	0	0	0	0	0	0	0	0	0	0	0	0	0	0	0	0	0	0	0	0	p__Chlorophyta	g__Chlamydomonas	s__Chlamydomonas_reinhardtii
ASV3460	0	0	0	0	0	0	0	0	0	0	0	0	0	0	0	0	0	0	0	0	0	0	0	0	0	0	0	0	0	0	0	0	0	0	35	0	14	0	36	p__Chlorophyta	g__Chlorella	s__Chlorella_vulgaris
ASV3455	0	0	0	0	0	0	0	0	0	0	0	0	0	0	0	0	0	0	0	0	0	27	0	0	0	0	0	20	0	0	0	0	0	16	0	0	0	8	14	p__Sarcomastigophora	g__Entamoeba	s__Entamoeba_equi
ASV345	0	0	0	0	0	22	0	84	0	0	0	0	0	0	0	0	0	39	0	0	167	156	0	54	0	205	669	168	0	0	255	122	0	0	0	0	0	0	0	p__Ciliophora	g__Euplotes	s__Euplotes_aediculatus
ASV3449	0	58	0	0	0	0	0	0	0	0	0	0	0	0	0	0	0	0	0	0	0	0	0	0	0	0	0	0	0	0	0	0	0	0	0	0	0	27	0	p__Bacillariophyta	g__Thalassiosira	s__Thalassiosira_tenera
ASV3448	0	85	0	0	0	0	0	0	0	0	0	0	0	0	0	0	0	0	0	0	0	0	0	0	0	0	0	0	0	0	0	0	0	0	0	0	0	0	0	p__Chrysophyta	g__Paraphysomonas	s__Paraphysomonas_imperforata
ASV3447	0	0	0	0	0	28	0	0	0	0	0	0	0	0	0	0	0	0	40	0	0	0	0	0	0	0	0	0	0	0	6	0	0	0	4	0	7	0	0	p__Ciliophora	g__Protogastrostyla	s__Protogastrostyla_pulchra
ASV3442	0	0	0	0	0	0	0	0	0	0	0	0	0	0	0	30	55	0	0	0	0	0	0	0	0	0	0	0	0	0	0	0	0	0	0	0	0	0	0	p__Bacillariophyta	g__Cymatopleura	s__Cymatopleura_solea
ASV3441	0	0	0	0	0	0	0	0	0	0	0	0	0	0	85	0	0	0	0	0	0	0	0	0	0	0	0	0	0	0	0	0	0	0	0	0	0	0	0	p__Chlorophyta	g__Hafniomonas	s__Hafniomonas_montana
ASV3436	0	0	0	0	0	0	0	0	0	0	0	0	0	0	0	0	0	0	0	0	0	0	0	0	0	0	0	0	0	0	0	0	0	0	0	0	4	0	82	p__Euglenophyta	g__Trachelomonas	s__Trachelomonas_bernardinensis
ASV3427	0	0	0	0	86	0	0	0	0	0	0	0	0	0	0	0	0	0	0	0	0	0	0	0	0	0	0	0	0	0	0	0	0	0	0	0	0	0	0	p__Sarcomastigophora	g__Rhynchomonas	s__Rhynchomonas_nasuta
ASV3414	0	0	0	0	0	0	0	0	0	0	0	0	0	86	0	0	0	0	0	0	0	0	0	0	0	0	0	0	0	0	0	0	0	0	0	0	0	0	0	p__Apicomplexa	g__Plasmodium	s__Plasmodium_ovale
ASV3408	0	0	0	0	0	0	0	0	86	0	0	0	0	0	0	0	0	0	0	0	0	0	0	0	0	0	0	0	0	0	0	0	0	0	0	0	0	0	0	p__Chrysophyta	g__Chrysosphaera	s__Chrysosphaera_parvula
ASV3405	0	0	0	0	0	0	0	0	0	0	0	0	0	0	0	0	0	0	0	87	0	0	0	0	0	0	0	0	0	0	0	0	0	0	0	0	0	0	0	p__Ciliophora	g__Woodruffides	s__Woodruffides_metabolicus
ASV3401	0	0	0	0	0	0	0	0	0	0	0	0	0	0	0	0	0	0	0	0	0	0	0	11	0	13	5	0	0	0	16	13	0	0	12	0	3	0	14	p__Apicomplexa	g__Hepatozoon	s__Hepatozoon_sipedon
ASV34	151	252	58	528	272	263	119	100	0	274	3122	0	228	0	0	0	0	0	0	504	621	57	342	395	561	420	790	565	58	650	922	1003	290	1441	114	103	727	577	0	p__Bacillariophyta	g__Discostella	s__Discostella_nipponica
ASV3399	0	0	0	87	0	0	0	0	0	0	0	0	0	0	0	0	0	0	0	0	0	0	0	0	0	0	0	0	0	0	0	0	0	0	0	0	0	0	0	p__Bacillariophyta	g__Achnanthidium	s__Achnanthidium_minutissimum
ASV339	0	117	56	127	0	131	72	37	0	68	0	0	0	0	0	0	0	0	51	0	114	0	105	126	85	39	22	0	17	62	33	92	7	57	36	13	146	51	299	p__Bacillariophyta	g__Planothidium	s__Planothidium_lanceolatum
ASV3383	0	0	0	0	0	0	0	0	0	0	0	0	0	0	0	0	0	0	0	0	0	0	0	0	0	0	0	0	0	19	42	27	0	0	0	0	0	0	0	p__Chlorophyta	g__Vitreochlamys	s__Vitreochlamys_pinguis
ASV3371	0	0	0	0	0	69	0	0	0	19	0	0	0	0	0	0	0	0	0	0	0	0	0	0	0	0	0	0	0	0	0	0	0	0	0	0	0	0	0	p__Rhodophyta	g__Neorhodella	s__Neorhodella_cyanea
ASV3365	0	0	0	0	0	0	0	0	0	0	0	0	0	0	0	0	0	0	0	0	0	0	0	0	0	0	0	0	0	0	0	0	0	0	0	0	26	36	27	p__Chlorophyta	g__Chloromonas	s__Chloromonas_nivalis
ASV3362	0	0	0	0	0	0	0	0	0	0	0	0	0	0	0	0	0	0	0	0	0	0	0	0	0	0	0	0	0	0	16	60	13	0	0	0	0	0	0	p__Sarcomastigophora	g__Salpingoeca	s__Salpingoeca_urceolata
ASV3361	0	0	0	0	0	0	0	0	0	0	0	0	0	0	0	0	0	0	0	0	0	0	0	0	12	0	13	0	0	18	18	0	0	0	0	0	28	0	0	p__Sarcomastigophora	g__Parabodo	s__Parabodo_caudatus
ASV3356	0	89	0	0	0	0	0	0	0	0	0	0	0	0	0	0	0	0	0	0	0	0	0	0	0	0	0	0	0	0	0	0	0	0	0	0	0	0	0	p__Ciliophora	g__Paruroleptus	s__Paruroleptus_lepisma
ASV3355	31	0	0	0	0	0	0	0	0	0	0	0	0	0	0	0	0	0	0	0	8	0	0	0	7	12	0	0	0	0	0	0	18	0	0	0	13	0	0	p__Cryptophyta	g__Goniomonas	s__Cryptomonas_pyrenoidifera
ASV3350	0	0	0	0	0	0	0	26	30	0	0	0	0	0	0	0	0	0	24	0	0	0	0	0	0	0	0	0	0	0	0	0	0	0	0	0	9	0	0	p__Arthropoda	g__Ceriodaphnia	s__Ceriodaphnia_dubia
ASV3348	0	0	0	0	0	0	0	0	0	0	0	0	0	0	0	0	0	0	0	0	0	0	0	49	0	0	41	0	0	0	0	0	0	0	0	0	0	0	0	p__Ciliophora	g__Anteholosticha	s__Anteholosticha_monilata
ASV3346	0	0	0	0	0	0	0	0	0	0	0	0	0	0	0	0	0	0	0	0	0	0	0	0	13	22	0	0	0	0	0	0	0	6	11	0	38	0	0	p__Bacillariophyta	g__Mayamaea	s__Mayamaea_atomus
ASV3340	0	0	0	0	0	0	0	0	0	0	0	0	0	0	0	0	0	0	0	0	0	0	0	0	0	0	0	18	5	0	0	0	0	0	16	0	33	18	0	p__Euglenophyta	g__Euglena	s__Euglena_agilis
ASV334	0	0	0	0	0	0	0	0	0	0	0	0	0	0	0	0	0	0	0	0	0	0	0	0	128	63	56	0	3	0	0	0	0	0	44	1713	0	0	0	p__Cryptophyta	g__Plagioselmis	s__Plagioselmis_nannoplanctica
ASV3332	0	0	0	0	0	0	0	0	0	0	0	0	0	0	0	0	0	0	0	0	0	0	0	0	0	0	0	0	0	0	0	0	0	0	0	0	0	0	91	p__Ciliophora	g__Nyctotheroides	s__Nyctotheroides_deslierresae
ASV3330	0	0	0	0	0	0	0	0	0	0	0	0	0	0	0	0	0	0	0	8	0	0	0	0	0	0	0	17	18	0	15	20	0	0	13	0	0	0	0	p__Chlorophyta	g__Lobochlamys	s__Lobochlamys_culleus
ASV3324	0	0	0	0	0	0	0	0	0	0	0	0	0	0	0	0	0	7	0	0	55	0	0	0	0	0	13	0	0	16	0	0	0	0	0	0	0	0	0	p__Ciliophora	g__Tokophrya	s__Tokophrya_quadripartita
ASV3317	0	0	0	0	0	0	0	0	0	91	0	0	0	0	0	0	0	0	0	0	0	0	0	0	0	0	0	0	0	0	0	0	0	0	0	0	0	0	0	p__Rotifera	g__Lepadella	s__Lepadella_rhomboides
ASV331	0	0	0	0	0	0	0	0	0	89	0	0	260	747	162	0	0	0	0	0	0	0	0	0	0	0	0	0	0	119	347	291	0	0	0	0	0	0	0	p__Bacillariophyta	g__Cyclotella	s__Cyclotella_meneghiniana
ASV3301	0	0	0	0	0	0	0	0	0	0	0	0	0	0	0	0	0	0	34	0	0	30	0	0	0	0	0	0	0	0	0	0	0	0	0	0	28	0	0	p__Chlorophyta	g__Chlamydomonas	s__Chlamydomonas_noctigama
ASV33	0	444	545	151	2004	469	84	1115	796	11	717	3143	409	445	296	133	196	1158	79	30	529	0	397	434	275	274	156	108	227	134	334	141	12	643	113	41	85	123	20	p__Chlorophyta	g__Desmodesmus	s__Desmodesmus_communis
ASV3296	0	0	0	0	0	0	0	0	0	0	0	0	0	0	0	75	0	0	0	0	0	0	0	0	0	0	0	0	0	0	0	0	0	0	0	0	0	0	17	p__Ciliophora	g__Protogastrostyla	s__Protogastrostyla_pulchra
ASV3286	0	0	0	0	0	0	0	0	0	0	0	0	0	0	0	0	0	0	0	0	0	0	0	0	0	0	0	0	0	0	0	0	0	0	0	0	49	0	44	p__Chlorophyta	g__Chlamydomonas	s__Chlamydomonas_reinhardtii
ASV3285	0	0	0	0	0	0	0	0	0	0	0	0	0	0	0	0	0	0	0	0	36	0	21	0	0	16	0	0	0	0	0	0	0	0	0	0	20	0	0	p__Chlorophyta	g__Wislouchiella	s__Wislouchiella_planctonica
ASV3281	0	0	0	0	0	0	0	0	0	0	0	0	0	0	0	0	0	0	0	0	0	0	0	0	0	0	0	0	0	0	93	0	0	0	0	0	0	0	0	p__Bacillariophyta	g__Fragilaria	s__Fragilaria_barbararum
ASV3273	0	0	93	0	0	0	0	0	0	0	0	0	0	0	0	0	0	0	0	0	0	0	0	0	0	0	0	0	0	0	0	0	0	0	0	0	0	0	0	p__Bacillariophyta	g__Cymatopleura	s__Cymatopleura_solea
ASV327	0	0	0	0	0	0	0	0	0	0	2025	0	0	0	0	0	0	0	0	0	0	0	0	0	0	0	0	0	0	0	0	0	0	0	0	0	0	0	0	p__Dinophyta	g__Unruhdinium	s__Unruhdinium_penardii
ASV3267	0	0	0	0	0	0	0	0	0	0	0	0	0	0	0	21	0	0	0	0	0	0	0	0	0	0	0	0	0	8	43	21	0	0	0	0	0	0	0	p__Chlorophyta	g__Nautococcus	s__Nautococcus_solutus
ASV3255	0	0	0	0	0	0	0	0	0	0	0	0	0	0	0	0	0	0	0	0	0	0	43	35	0	0	0	0	0	0	0	0	0	0	0	0	0	16	0	p__Chlorophyta	g__Actinochloris	s__Actinochloris_sphaerica
ASV325	0	0	48	69	0	110	23	0	0	48	0	0	97	0	297	59	354	0	191	0	61	0	28	27	34	23	51	0	0	13	60	110	0	11	0	33	97	20	163	p__Sarcomastigophora	g__Neobodo	s__Neobodo_designis
ASV3248	0	0	0	0	0	0	0	0	0	0	0	0	0	0	0	0	0	0	0	0	0	0	0	0	0	0	0	0	31	31	32	0	0	0	0	0	0	0	0	p__Chlorophyta	g__Chloromonas	s__Chloromonas_perforata
ASV3246	0	0	0	0	0	58	0	0	0	0	0	0	0	0	0	0	0	0	0	0	0	0	0	3	0	0	0	0	0	0	0	0	0	0	3	0	13	0	17	p__Chlorophyta	g__Catena	s__Catena_viridis
ASV3245	0	0	87	0	0	0	7	0	0	0	0	0	0	0	0	0	0	0	0	0	0	0	0	0	0	0	0	0	0	0	0	0	0	0	0	0	0	0	0	p__Ciliophora	g__Metopus	s__Metopus_hasei
ASV3241	0	0	0	0	0	0	0	0	0	6	0	0	0	0	0	0	0	0	0	0	0	0	0	0	0	0	0	12	0	61	10	0	0	0	0	0	0	5	0	p__Ciliophora	g__Varistrombidium	s__Varistrombidium_kielum
ASV3237	0	0	0	0	0	0	0	0	0	0	0	0	0	0	0	0	0	0	0	0	0	0	0	0	0	22	23	0	0	0	0	0	0	0	50	0	0	0	0	p__Ciliophora	g__Isotricha	s__Isotricha_prostoma
ASV3235	0	0	0	0	0	0	0	0	0	0	0	0	0	0	0	0	0	0	0	0	0	0	16	40	0	0	0	0	16	3	15	0	0	0	0	0	0	0	5	p__Sarcomastigophora	g__Stylochlamydium	s__Stylochlamydium_venustum
ASV3234	0	0	0	0	0	0	0	0	0	0	0	0	0	0	0	0	0	0	0	0	0	0	0	8	10	21	14	17	12	0	13	0	0	0	0	0	0	0	0	p__Chlorophyta	g__Chlamydomonas	s__Chlamydomonas_bacca
ASV3229	0	0	74	0	0	0	0	0	0	0	0	0	0	0	0	0	0	0	0	0	0	0	0	0	0	0	0	0	0	0	0	21	0	0	0	0	0	0	0	p__Ciliophora	g__Rubrioxytricha	s__Rubrioxytricha_haematoplasma
ASV3226	0	0	0	0	0	0	0	0	37	0	0	0	0	0	0	0	0	0	13	0	0	0	0	0	0	0	0	0	0	0	45	0	0	0	0	0	0	0	0	p__Ciliophora	g__Pseudogastrostyla	s__Pseudogastrostyla_flava
ASV3220	0	0	0	0	0	0	0	0	0	0	0	0	0	0	0	0	0	0	0	0	0	0	0	0	10	30	39	17	0	0	0	0	0	0	0	0	0	0	0	p__Chlorophyta	g__Carteria	s__Carteria_radiosa
ASV322	0	0	164	0	0	0	52	0	0	11	0	0	0	0	0	0	0	0	0	0	58	16	0	59	231	361	504	35	20	75	30	24	307	22	0	0	61	0	0	p__Rotifera	g__Ploesoma	s__Polyarthra_remata
ASV3216	0	0	0	59	0	0	29	8	0	0	0	0	0	0	0	0	0	0	0	0	0	0	0	0	0	0	0	0	0	0	0	0	0	0	0	0	0	0	0	p__Cryptophyta	g__Chroomonas	s__Chroomonas_nordstedtii
ASV3215	0	0	96	0	0	0	0	0	0	0	0	0	0	0	0	0	0	0	0	0	0	0	0	0	0	0	0	0	0	0	0	0	0	0	0	0	0	0	0	p__Bacillariophyta	g__Cymatopleura	s__Cymatopleura_elliptica
ASV3213	0	59	0	0	0	0	0	0	0	0	0	0	0	0	0	0	0	0	0	0	0	0	7	8	0	0	0	0	0	0	0	0	0	0	0	0	6	7	9	p__Chlorophyta	g__Ulvella	s__Ulvella_bullata
ASV3210	0	0	0	0	0	0	30	0	0	0	0	0	0	66	0	0	0	0	0	0	0	0	0	0	0	0	0	0	0	0	0	0	0	0	0	0	0	0	0	p__Ciliophora	g__Urostomides	s__Urostomides_striatus
ASV321	0	171	0	101	0	0	0	0	0	0	0	0	0	0	0	0	0	0	0	15	432	32	176	202	222	141	211	54	0	117	108	32	0	0	39	0	0	0	0	p__Bacillariophyta	g__Fistulifera	s__Fistulifera_pelliculosa
ASV3203	0	0	0	0	0	0	0	0	0	0	0	0	0	0	0	0	0	0	0	0	0	0	0	15	0	19	0	0	0	9	16	20	0	0	18	0	0	0	0	p__Sarcomastigophora	g__Raperostelium	s__Raperostelium_ohioense
ASV3199	0	0	0	0	97	0	0	0	0	0	0	0	0	0	0	0	0	0	0	0	0	0	0	0	0	0	0	0	0	0	0	0	0	0	0	0	0	0	0	p__Chrysophyta	g__Paraphysomonas	s__Paraphysomonas_imperforata
ASV3197	0	97	0	0	0	0	0	0	0	0	0	0	0	0	0	0	0	0	0	0	0	0	0	0	0	0	0	0	0	0	0	0	0	0	0	0	0	0	0	p__Bacillariophyta	g__Campylodiscus	s__Campylodiscus_thuretii
ASV3195	0	97	0	0	0	0	0	0	0	0	0	0	0	0	0	0	0	0	0	0	0	0	0	0	0	0	0	0	0	0	0	0	0	0	0	0	0	0	0	p__Bacillariophyta	g__Fistulifera	s__Fistulifera_pelliculosa
ASV3194	20	45	0	0	0	0	13	0	0	0	0	0	0	0	0	0	0	0	0	0	11	0	0	8	0	0	0	0	0	0	0	0	0	0	0	0	0	0	0	p__Cryptophyta	g__Goniomonas	s__Cryptomonas_pyrenoidifera
ASV3193	0	0	0	0	0	0	0	0	0	0	0	0	0	0	0	0	0	0	10	0	0	0	0	0	13	0	0	29	0	11	0	26	0	0	0	0	0	0	8	p__Ciliophora	g__Strongylidium	s__Strongylidium_orientale
ASV3191	0	0	0	0	0	0	0	0	0	0	0	0	0	0	0	0	0	0	83	0	0	0	0	0	0	0	0	14	0	0	0	0	0	0	0	0	0	0	0	p__Ciliophora	g__Urosomoida	s__Urosomoida_paragiliformis
ASV319	0	0	0	0	0	85	52	0	0	32	60	0	0	0	0	53	211	0	0	0	70	0	0	0	83	77	292	149	0	227	321	93	0	0	0	38	106	63	49	p__Bacillariophyta	g__Fistulifera	s__Fistulifera_pelliculosa
ASV3189	0	0	0	0	0	0	0	0	0	0	0	97	0	0	0	0	0	0	0	0	0	0	0	0	0	0	0	0	0	0	0	0	0	0	0	0	0	0	0	p__Rhodophyta	g__Pyropia	s__Pyropia_yezoensis
ASV3188	0	0	0	0	0	0	0	0	0	0	0	85	0	0	0	0	0	0	12	0	0	0	0	0	0	0	0	0	0	0	0	0	0	0	0	0	0	0	0	p__Chlorophyta	g__Dictyosphaerium	s__Dictyosphaerium_ehrenbergianum
ASV3181	0	0	0	0	0	0	0	0	0	0	0	0	0	0	0	0	0	0	0	0	0	0	0	0	0	0	56	0	0	0	0	42	0	0	0	0	0	0	0	p__Rotifera	g__Notommata	s__Notommata_allantois
ASV3180	0	0	0	0	0	0	0	0	0	0	0	0	0	0	0	0	0	0	0	0	0	0	0	0	0	0	0	0	0	0	11	41	0	0	0	0	0	46	0	p__Xanthophyta	g__Gonyostomum	s__Gonyostomum_semen
ASV318	0	0	0	128	0	44	18	0	243	0	0	0	0	0	0	0	0	0	0	0	228	29	89	52	137	128	198	52	0	145	101	61	0	0	113	12	206	60	24	p__Ciliophora	g__Tetrahymena	s__Tetrahymena_mobilis
ASV3179	0	0	0	0	0	0	0	0	0	0	0	0	0	0	0	0	0	0	0	0	0	0	52	0	0	0	0	0	0	0	34	0	12	0	0	0	0	0	0	p__Ciliophora	g__Uroleptus	s__Uroleptus_gallina
ASV3177	0	0	0	0	0	0	0	0	0	0	0	0	0	0	0	0	0	0	0	0	4	0	0	0	0	0	0	6	0	0	8	11	0	14	11	6	38	0	0	p__Euglenophyta	g__Trachelomonas	s__Trachelomonas_bernardinensis
ASV3176	0	0	0	0	0	0	0	0	0	0	0	0	0	0	0	0	0	0	0	0	14	0	10	28	9	11	0	18	8	0	0	0	0	0	0	0	0	0	0	p__Cryptophyta	g__Chroomonas	s__Chroomonas_mesostigmatica
ASV3168	0	57	0	0	0	0	0	0	0	0	0	0	0	0	0	0	0	0	0	6	0	0	13	0	11	11	0	0	0	0	0	0	0	0	0	0	0	0	0	p__Chlorophyta	g__Oocystella	s__Oocystella_oogama
ASV3166	0	98	0	0	0	0	0	0	0	0	0	0	0	0	0	0	0	0	0	0	0	0	0	0	0	0	0	0	0	0	0	0	0	0	0	0	0	0	0	p__Bacillariophyta	g__Amphora	s__Amphora_coffeiformis
ASV3161	0	0	0	0	0	0	0	0	0	0	0	0	0	0	0	0	0	98	0	0	0	0	0	0	0	0	0	0	0	0	0	0	0	0	0	0	0	0	0	p__Apicomplexa	g__Leidyana	s__Leidyana_migrator
ASV3158	0	0	0	0	0	0	0	0	0	0	0	0	0	0	0	8	0	0	0	0	22	0	0	0	22	22	24	0	0	0	0	0	0	0	0	0	0	0	0	p__Ciliophora	g__Cyclidium	s__Cyclidium_glaucoma
ASV3156	0	0	0	0	0	0	0	35	0	0	20	0	0	0	0	0	0	0	0	0	0	3	0	0	0	0	0	0	0	0	0	0	0	0	0	0	17	0	23	p__Sarcomastigophora	g__Acanthamoeba	s__Acanthamoeba_quina
ASV3154	0	0	0	0	0	0	3	0	0	95	0	0	0	0	0	0	0	0	0	0	0	0	0	0	0	0	0	0	0	0	0	0	0	0	0	0	0	0	0	p__Chrysophyta	g__Chrysamoeba	s__Chrysamoeba_mikrokonta
ASV315	0	0	0	0	0	62	28	7	0	156	0	0	0	0	0	16	356	0	0	0	226	0	107	97	131	244	433	0	39	17	0	0	0	0	0	0	83	22	71	p__Ciliophora	g__Chilodonella	s__Chilodonella_uncinata
ASV3144	0	0	0	0	0	0	0	0	0	0	0	0	0	0	0	0	0	0	0	0	0	0	0	0	0	0	0	14	0	0	0	57	0	28	0	0	0	0	0	p__Bacillariophyta	g__Planothidium	s__Planothidium_lanceolatum
ASV3143	0	0	0	0	0	0	59	0	0	0	0	0	0	0	0	0	0	0	0	0	0	0	19	0	0	0	21	0	0	0	0	0	0	0	0	0	0	0	0	p__Chlorophyta	g__Astrephomene	s__Astrephomene_perforata
ASV314	0	136	0	101	178	930	0	0	0	30	0	0	0	0	0	0	0	0	0	0	0	0	0	86	0	48	67	522	0	0	0	0	0	0	0	0	0	0	0	p__Chlorophyta	g__Hafniomonas	s__Hafniomonas_montana
ASV3130	0	0	0	0	0	0	0	0	0	0	0	0	0	0	0	0	0	0	0	0	0	0	0	0	0	0	0	0	0	0	0	0	0	0	0	0	0	0	100	p__Euglenophyta	g__Euglena	s__Euglena_hiemalis
ASV3127	0	0	0	0	0	0	0	0	0	0	0	0	0	0	0	0	0	0	0	0	0	0	0	0	0	0	0	0	0	0	0	0	0	0	35	0	40	0	25	p__Chlorophyta	g__Deasonia	s__Deasonia_multinucleata
ASV3123	0	0	0	0	0	0	0	0	0	0	0	0	0	0	0	0	0	0	0	0	11	0	0	12	23	0	0	0	0	36	0	0	0	0	0	0	0	0	18	p__Ciliophora	g__Arcuospathidium	s__Arcuospathidium_muscorum
ASV3120	0	100	0	0	0	0	0	0	0	0	0	0	0	0	0	0	0	0	0	0	0	0	0	0	0	0	0	0	0	0	0	0	0	0	0	0	0	0	0	p__Bacillariophyta	g__Amphora	s__Amphora_coffeiformis
ASV3116	0	0	0	0	0	0	0	0	0	100	0	0	0	0	0	0	0	0	0	0	0	0	0	0	0	0	0	0	0	0	0	0	0	0	0	0	0	0	0	p__Chlorophyta	g__Chlamydomonas	s__Chlamydomonas_reinhardtii
ASV311	0	0	0	0	0	0	154	0	0	0	0	0	0	0	0	0	0	0	0	0	203	0	195	222	394	365	167	0	0	0	130	0	0	0	163	0	32	94	0	p__Ciliophora	g__Loxodes	s__Loxodes_striatus
ASV3109	0	0	0	0	0	0	0	0	0	0	0	0	0	0	0	0	0	0	0	0	0	0	0	0	0	0	0	7	0	0	0	0	0	0	15	0	29	0	50	p__Chlorophyta	g__Chlorococcum	s__Chlorococcum_minutum
ASV31	0	0	0	0	0	0	0	0	0	0	0	0	0	0	0	0	0	0	0	0	6099	107	3316	3918	390	1104	554	0	0	0	0	0	0	0	1364	0	0	0	0	p__Chlorophyta	g__Wislouchiella	s__Wislouchiella_planctonica
ASV3095	0	0	0	0	0	0	0	0	0	0	101	0	0	0	0	0	0	0	0	0	0	0	0	0	0	0	0	0	0	0	0	0	0	0	0	0	0	0	0	p__Bacillariophyta	g__Fistulifera	s__Fistulifera_pelliculosa
ASV3090	0	0	0	0	0	0	0	0	0	0	0	0	0	0	0	0	0	0	0	0	0	30	0	0	0	0	0	0	0	0	23	0	0	49	0	0	0	0	0	p__Chlorophyta	g__Gonium	s__Gonium_pectorale
ASV3088	0	0	0	0	0	0	0	0	0	0	0	0	0	0	0	0	0	0	0	0	0	0	0	0	0	0	0	0	0	0	8	0	0	0	0	0	0	0	94	p__Xanthophyta	g__Haramonas	s__Haramonas_pauciplastida
ASV3087	0	0	0	0	0	0	0	0	0	0	0	0	0	0	0	0	0	0	0	0	0	0	0	0	0	0	0	0	0	102	0	0	0	0	0	0	0	0	0	p__Bacillariophyta	g__Cymbella	s__Cymbella_excisa
ASV3086	0	0	0	0	0	0	0	0	0	0	0	0	0	0	0	0	0	0	0	0	0	0	0	0	0	0	16	0	0	86	0	0	0	0	0	0	0	0	0	p__Ciliophora	g__Atractos	s__Atractos_contortus
ASV3066	0	0	103	0	0	0	0	0	0	0	0	0	0	0	0	0	0	0	0	0	0	0	0	0	0	0	0	0	0	0	0	0	0	0	0	0	0	0	0	p__Bacillariophyta	g__Thalassiosira	s__Thalassiosira_tenera
ASV3064	0	0	0	0	0	0	0	0	0	0	0	0	0	0	0	0	0	0	50	0	0	0	0	0	0	0	0	0	0	0	53	0	0	0	0	0	0	0	0	p__Ciliophora	g__Uroleptus	s__Uroleptus_gallina
ASV3063	0	0	0	0	0	0	0	0	0	0	0	0	0	0	0	0	103	0	0	0	0	0	0	0	0	0	0	0	0	0	0	0	0	0	0	0	0	0	0	p__Xanthophyta	g__Xanthonema	s__Xanthonema_debile
ASV3049	0	0	0	0	0	0	0	0	0	0	0	0	0	0	0	0	0	0	0	0	31	0	0	0	0	0	0	17	0	56	0	0	0	0	0	0	0	0	0	p__Ciliophora	g__Stentor	s__Stentor_amethystinus
ASV3047	0	0	0	0	0	0	16	0	0	0	0	0	0	0	0	0	0	0	0	0	0	0	0	0	0	0	0	8	0	30	0	5	0	45	0	0	0	0	0	p__Chlorophyta	g__Gungnir	s__Gungnir_kasakii
ASV3043	0	104	0	0	0	0	0	0	0	0	0	0	0	0	0	0	0	0	0	0	0	0	0	0	0	0	0	0	0	0	0	0	0	0	0	0	0	0	0	p__Bacillariophyta	g__Amphora	s__Amphora_coffeiformis
ASV3041	0	104	0	0	0	0	0	0	0	0	0	0	0	0	0	0	0	0	0	0	0	0	0	0	0	0	0	0	0	0	0	0	0	0	0	0	0	0	0	p__Bacillariophyta	g__Amphora	s__Amphora_coffeiformis
ASV3014	0	0	0	0	0	0	0	0	0	0	0	0	0	0	0	0	0	0	0	0	14	0	5	0	9	11	3	0	0	64	0	0	0	0	0	0	0	0	0	p__Ciliophora	g__Strombidinopsis	s__Strombidinopsis_sinicum
ASV3010	0	0	0	106	0	0	0	0	0	0	0	0	0	0	0	0	0	0	0	0	0	0	0	0	0	0	0	0	0	0	0	0	0	0	0	0	0	0	0	p__Bacillariophyta	g__Achnanthidium	s__Achnanthidium_minutissimum
ASV3009	0	0	0	106	0	0	0	0	0	0	0	0	0	0	0	0	0	0	0	0	0	0	0	0	0	0	0	0	0	0	0	0	0	0	0	0	0	0	0	p__Bacillariophyta	g__Thalassiosira	s__Thalassiosira_tenera
ASV3008	0	0	0	0	0	0	38	0	0	0	0	0	0	0	0	0	0	0	43	0	0	0	0	0	0	0	0	0	0	0	0	0	0	0	0	0	11	0	14	p__Sarcomastigophora	g__Nuclearia	s__Nuclearia_moebiusi
ASV3005	0	0	0	0	0	0	0	0	0	64	0	0	0	0	0	0	0	0	0	0	0	0	0	0	0	0	0	0	3	2	0	0	0	0	0	0	0	0	37	p__Sarcomastigophora	g__Stylochlamydium	s__Stylochlamydium_venustum
ASV3004	0	0	0	0	0	0	0	0	0	0	0	0	0	0	0	0	0	0	0	0	19	0	37	36	0	15	0	0	0	0	0	0	0	0	0	0	0	0	0	p__Chlorophyta	g__Sorastrum	s__Sorastrum_pediastriforme
ASV2998	0	0	107	0	0	0	0	0	0	0	0	0	0	0	0	0	0	0	0	0	0	0	0	0	0	0	0	0	0	0	0	0	0	0	0	0	0	0	0	p__Bacillariophyta	g__Amphora	s__Amphora_coffeiformis
ASV2997	0	107	0	0	0	0	0	0	0	0	0	0	0	0	0	0	0	0	0	0	0	0	0	0	0	0	0	0	0	0	0	0	0	0	0	0	0	0	0	p__Bacillariophyta	g__Amphora	s__Amphora_coffeiformis
ASV2992	0	0	0	0	0	0	0	0	0	0	0	0	0	0	0	0	0	0	0	0	0	0	0	31	22	40	0	0	0	0	0	0	0	0	0	0	15	0	0	p__Chlorophyta	g__Lobochlamys	s__Lobochlamys_culleus
ASV2987	0	0	0	0	0	0	0	0	0	0	0	0	0	0	0	0	0	0	0	0	4	0	0	10	0	0	22	21	7	0	0	33	0	0	0	0	0	11	0	p__Euglenophyta	g__Strombomonas	s__Strombomonas_borystheniensis
ASV2986	0	0	0	0	0	0	0	0	0	0	0	0	0	0	0	0	0	0	0	0	0	0	0	0	0	0	0	65	8	0	0	0	0	0	0	0	35	0	0	p__Euglenophyta	g__Euglenaria	s__Euglenaria_clavata
ASV2984	0	0	0	0	0	108	0	0	0	0	0	0	0	0	0	0	0	0	0	0	0	0	0	0	0	0	0	0	0	0	0	0	0	0	0	0	0	0	0	p__Bacillariophyta	g__Thalassiosira	s__Thalassiosira_tenera
ASV2974	0	0	0	0	0	0	0	0	0	0	0	0	0	0	0	0	0	0	0	0	0	0	0	0	0	0	0	0	0	0	0	0	0	109	0	0	0	0	0	p__Dinophyta	g__Pyrophacus	s__Pyrophacus_steinii
ASV2961	0	0	0	0	0	0	0	0	0	0	0	0	0	0	0	0	0	0	0	0	21	0	14	14	15	22	8	0	0	0	0	0	0	0	0	0	0	16	0	p__Chlorophyta	g__Pseudomuriella	s__Pseudomuriella_schumacherensis
ASV2960	0	0	0	0	0	0	0	0	0	0	0	0	0	0	0	0	0	0	0	0	7	0	12	17	26	25	15	0	0	0	0	0	0	0	8	0	0	0	0	p__Ciliophora	g__Coleps	s__Coleps_amphacanthus
ASV2956	0	0	0	0	0	0	18	0	0	0	0	0	0	0	0	0	0	0	0	0	0	0	0	7	2	0	0	0	0	12	0	0	0	0	0	0	71	0	0	p__Myxozoa	g__Tetracapsuloides	s__Tetracapsuloides_bryosalmonae
ASV2954	0	0	110	0	0	0	0	0	0	0	0	0	0	0	0	0	0	0	0	0	0	0	0	0	0	0	0	0	0	0	0	0	0	0	0	0	0	0	0	p__Bacillariophyta	g__Cymatopleura	s__Cymatopleura_solea
ASV2953	0	0	110	0	0	0	0	0	0	0	0	0	0	0	0	0	0	0	0	0	0	0	0	0	0	0	0	0	0	0	0	0	0	0	0	0	0	0	0	p__Bacillariophyta	g__Cyclotella	s__Cyclotella_scaldensis
ASV295	0	94	0	0	0	0	0	23	0	0	0	0	0	0	0	0	0	0	0	0	274	0	167	100	77	123	49	0	0	0	0	0	0	0	542	59	403	349	43	p__Chlorophyta	g__Mychonastes	s__Mychonastes_homosphaera
ASV2941	0	0	0	0	0	0	0	0	0	0	0	0	0	0	0	0	0	0	0	0	0	0	0	0	0	0	0	0	0	0	0	0	0	0	111	0	0	0	0	p__Chlorophyta	g__Wislouchiella	s__Wislouchiella_planctonica
ASV2940	0	0	0	0	0	0	0	0	0	0	0	0	0	0	0	0	0	0	0	0	0	0	0	11	0	0	0	0	0	0	13	87	0	0	0	0	0	0	0	p__Apicomplexa	g__Gregarina	s__Gregarina_caledia
ASV294	0	0	0	0	0	0	93	42	0	1046	0	0	879	0	0	0	0	0	0	0	15	0	0	0	0	24	19	0	0	87	24	8	0	3	0	0	46	16	5	p__Sarcomastigophora	g__Vannella	s__Vannella_epipetala
ASV2939	0	0	0	0	0	0	34	0	0	0	0	0	0	0	0	0	0	0	0	0	0	0	0	0	0	0	0	0	0	30	0	0	0	0	12	0	35	0	0	p__Chlorophyta	g__Compactochlorella	s__Compactochlorella_kochii
ASV2937	0	0	0	111	0	0	0	0	0	0	0	0	0	0	0	0	0	0	0	0	0	0	0	0	0	0	0	0	0	0	0	0	0	0	0	0	0	0	0	p__Bacillariophyta	g__Cymatopleura	s__Cymatopleura_solea
ASV2933	0	0	0	0	0	0	0	0	0	0	0	0	0	0	0	0	0	0	0	0	14	0	13	36	16	24	9	0	0	0	0	0	0	0	0	0	0	0	0	p__Ciliophora	g__Urocentrum	s__Urocentrum_turbo
ASV2925	0	0	0	0	0	39	0	0	0	0	0	0	0	0	0	0	0	0	0	0	15	0	0	0	0	14	24	0	0	0	20	0	0	0	0	0	0	0	0	p__Ciliophora	g__Diophryopsis	s__Diophryopsis_hystrix
ASV2922	0	0	0	0	0	0	0	0	0	0	0	0	0	0	0	0	112	0	0	0	0	0	0	0	0	0	0	0	0	0	0	0	0	0	0	0	0	0	0	p__Chlorophyta	g__Desmodesmus	s__Desmodesmus_communis
ASV2916	0	0	0	0	0	0	0	0	0	68	0	0	0	0	0	0	0	0	0	0	44	0	0	0	0	0	0	0	0	0	0	0	0	0	0	0	0	0	0	p__Rotifera	g__Monommata	s__Monommata_maculata
ASV2913	0	0	0	0	0	0	0	0	0	0	0	0	0	0	0	0	0	0	0	0	0	0	21	0	0	0	0	0	4	0	0	0	0	0	0	0	58	30	0	p__Sarcomastigophora	g__Vermamoeba	s__Vermamoeba_vermiformis
ASV2909	0	0	0	64	0	49	0	0	0	0	0	0	0	0	0	0	0	0	0	0	0	0	0	0	0	0	0	0	0	0	0	0	0	0	0	0	0	0	0	p__Chlorophyta	g__Monomastix	s__Monomastix_minuta
ASV2904	0	113	0	0	0	0	0	0	0	0	0	0	0	0	0	0	0	0	0	0	0	0	0	0	0	0	0	0	0	0	0	0	0	0	0	0	0	0	0	p__Bacillariophyta	g__Thalassiosira	s__Thalassiosira_tenera
ASV2903	0	106	0	0	0	0	7	0	0	0	0	0	0	0	0	0	0	0	0	0	0	0	0	0	0	0	0	0	0	0	0	0	0	0	0	0	0	0	0	p__Cryptophyta	g__Goniomonas	s__Cryptomonas_tetrapyrenoidosa
ASV290	0	234	0	142	0	0	0	0	0	0	66	0	0	0	0	0	0	0	0	0	118	0	134	195	73	100	0	123	57	45	677	37	0	34	0	20	184	84	34	p__Bacillariophyta	g__Aulacoseira	s__Aulacoseira_nyassensis
ASV2894	0	0	0	0	0	0	0	0	0	0	0	0	0	0	0	0	0	0	0	0	12	0	0	13	6	14	10	0	0	9	0	0	0	0	50	0	0	0	0	p__Chlorophyta	g__Hemiflagellochloris	s__Hemiflagellochloris_kazakhstanica
ASV2888	0	104	0	0	0	0	0	0	0	0	0	0	0	0	0	0	0	0	0	0	0	0	0	0	0	0	0	0	0	0	10	0	0	0	0	0	0	0	0	p__Euglenophyta	g__Euglena	s__Euglena_longa
ASV2875	0	0	0	0	0	0	0	0	0	0	0	0	0	0	0	0	0	0	0	0	35	0	0	0	0	0	0	0	0	0	0	0	0	0	0	0	0	0	80	p__Ciliophora	g__Protocyclidium	s__Protocyclidium_citrullus
ASV2872	0	115	0	0	0	0	0	0	0	0	0	0	0	0	0	0	0	0	0	0	0	0	0	0	0	0	0	0	0	0	0	0	0	0	0	0	0	0	0	p__Arthropoda	g__Macrocyclops	s__Macrocyclops_albidus
ASV2865	0	0	0	0	0	0	0	0	0	0	115	0	0	0	0	0	0	0	0	0	0	0	0	0	0	0	0	0	0	0	0	0	0	0	0	0	0	0	0	p__Bacillariophyta	g__Discostella	s__Discostella_nipponica
ASV2863	0	0	0	0	0	0	0	0	0	0	0	0	0	0	0	0	0	0	0	0	0	0	0	0	0	0	0	0	0	0	0	97	0	0	0	19	0	0	0	p__Ciliophora	g__Stylonychia	s__Stylonychia_pustulata
ASV2858	0	0	0	0	0	0	0	0	0	0	0	0	0	0	0	0	0	0	0	0	0	0	13	0	0	0	0	66	22	0	0	0	0	15	0	0	0	0	0	p__Chlorophyta	g__Carteria	s__Carteria_lunzensis
ASV2851	0	0	0	0	0	0	0	0	0	0	0	0	0	0	0	0	0	0	0	0	13	0	0	15	0	0	20	17	0	0	29	23	0	0	0	0	0	0	0	p__Chlorophyta	g__Chlamydomonas	s__Chlamydomonas_bacca
ASV2850	0	0	0	0	0	0	0	0	0	0	0	0	0	0	0	0	0	0	0	0	0	0	0	0	0	0	0	57	26	34	0	0	0	0	0	0	0	0	0	p__Chlorophyta	g__Ankistrodesmus	s__Ankistrodesmus_falcatus
ASV2848	0	0	0	0	0	0	0	0	0	0	0	0	0	0	0	0	0	0	8	0	0	6	6	0	0	0	0	10	0	0	34	26	0	0	3	0	18	6	0	p__Sarcomastigophora	g__Korotnevella	s__Korotnevella_pelagolacustris
ASV2841	0	0	0	0	0	0	0	0	0	0	0	0	0	0	0	0	0	0	0	0	0	0	0	0	0	0	0	0	0	0	0	0	0	118	0	0	0	0	0	p__Chrysophyta	g__Synura	s__Synura_curtispina
ASV2829	0	0	0	0	0	0	0	0	106	12	0	0	0	0	0	0	0	0	0	0	0	0	0	0	0	0	0	0	0	0	0	0	0	0	0	0	0	0	0	p__Cryptophyta	g__Goniomonas	s__Cryptomonas_pyrenoidifera
ASV2827	0	0	0	0	0	0	0	0	0	0	0	0	0	0	0	0	0	0	0	0	0	0	0	0	0	0	0	0	0	34	0	0	0	0	0	0	21	37	27	p__Ciliophora	g__Halteria	s__Halteria_grandinella
ASV2826	0	0	0	0	0	0	0	0	0	0	0	0	0	0	0	0	0	0	0	0	0	42	0	0	0	0	8	33	0	0	0	0	0	17	0	0	0	19	0	p__Sarcomastigophora	g__Lafontella	s__Lafontella_mariadeanei
ASV2824	0	0	0	119	0	0	0	0	0	0	0	0	0	0	0	0	0	0	0	0	0	0	0	0	0	0	0	0	0	0	0	0	0	0	0	0	0	0	0	p__Bacillariophyta	g__Fragilaria	s__Fragilaria_barbararum
ASV282	0	0	0	0	0	0	0	0	0	0	0	0	0	0	0	0	0	0	0	0	25	0	26	52	148	304	224	0	0	0	0	0	0	0	1084	580	0	0	0	p__Chlorophyta	g__Ettlia	s__Ettlia_carotinosa
ASV2818	0	0	0	0	0	0	0	0	119	0	0	0	0	0	0	0	0	0	0	0	0	0	0	0	0	0	0	0	0	0	0	0	0	0	0	0	0	0	0	p__Bacillariophyta	g__Cymbella	s__Cymbella_cistuliformis
ASV2816	0	0	0	0	0	0	0	0	0	0	0	0	0	0	0	0	0	0	0	0	14	0	0	0	0	38	24	0	0	0	0	0	0	0	0	0	44	0	0	p__Rotifera	g__Notholca	s__Notholca_acuminata
ASV2810	0	0	0	120	0	0	0	0	0	0	0	0	0	0	0	0	0	0	0	0	0	0	0	0	0	0	0	0	0	0	0	0	0	0	0	0	0	0	0	p__Sarcomastigophora	g__Stygamoeba	s__Stygamoeba_regulata
ASV2802	0	0	0	0	0	0	22	0	0	98	0	0	0	0	0	0	0	0	0	0	0	0	0	0	0	0	0	0	0	0	0	0	0	0	0	0	0	0	0	p__Chlorophyta	g__Floydiella	s__Floydiella_terrestris
ASV2800	0	0	0	0	0	0	0	0	0	0	0	0	0	0	0	0	0	0	0	0	0	0	0	0	0	0	6	0	0	0	0	0	0	9	17	0	70	19	0	p__Ciliophora	g__Dexiotricha	s__Dexiotricha_granulosa
ASV280	0	0	0	0	0	0	0	0	0	0	0	0	0	0	0	0	0	0	0	2208	33	128	0	10	0	0	0	19	0	0	0	0	0	16	0	0	0	47	0	p__Chlorophyta	g__Radiosphaera	s__Radiosphaera_negevensis
ASV2796	0	0	0	0	0	0	0	0	0	0	0	0	0	0	0	0	0	0	0	0	0	0	0	0	0	0	0	9	0	0	38	33	0	8	0	0	10	23	0	p__Euglenophyta	g__Phacus	s__Phacus_limnophila
ASV2795	0	0	0	0	115	0	0	0	0	0	0	0	0	0	0	0	0	0	0	0	0	0	0	0	0	0	0	0	0	0	0	6	0	0	0	0	0	0	0	p__Sarcomastigophora	g__Monosiga	s__Monosiga_ovata
ASV2786	0	0	0	0	0	0	0	0	0	0	0	0	0	0	0	0	0	0	0	0	0	0	0	0	0	26	10	0	0	0	0	0	0	0	21	40	0	0	25	p__Ciliophora	g__Microdiaphanosoma	s__Microdiaphanosoma_arcuatum
ASV2784	0	0	0	0	0	0	0	0	0	0	0	0	0	0	0	0	0	0	0	0	30	0	0	0	0	27	41	24	0	0	0	0	0	0	0	0	0	0	0	p__Bacillariophyta	g__Urosolenia	s__Urosolenia_eriensis
ASV2783	0	0	0	0	0	0	0	0	0	0	0	0	0	0	0	0	0	0	0	0	5	0	0	13	0	11	16	74	3	0	0	0	0	0	0	0	0	0	0	p__Haptophyta	g__Diacronema	s__Diacronema_vlkianum
ASV2782	0	0	0	0	0	0	122	0	0	0	0	0	0	0	0	0	0	0	0	0	0	0	0	0	0	0	0	0	0	0	0	0	0	0	0	0	0	0	0	p__Chlorophyta	g__Carteria	s__Carteria_radiosa
ASV2780	0	0	0	122	0	0	0	0	0	0	0	0	0	0	0	0	0	0	0	0	0	0	0	0	0	0	0	0	0	0	0	0	0	0	0	0	0	0	0	p__Bacillariophyta	g__Cymatopleura	s__Cymatopleura_solea
ASV278	0	0	0	0	0	0	0	0	0	0	0	0	0	719	0	0	99	0	0	0	0	6	0	0	94	52	105	138	8	53	414	563	163	45	0	0	0	6	0	p__Dinophyta	g__Woloszynskia	s__Woloszynskia_pascheri
ASV2777	0	0	0	0	0	0	0	0	0	24	0	0	67	25	0	6	0	0	0	0	0	0	0	0	0	0	0	0	0	0	0	0	0	0	0	0	0	0	0	p__Sarcomastigophora	g__Neobodo	s__Neobodo_designis
ASV2774	0	0	0	0	0	0	0	0	0	0	0	0	0	0	0	0	0	0	0	0	0	0	0	0	0	0	0	0	0	0	0	0	123	0	0	0	0	0	0	p__Chlorophyta	g__Micractinium	s__Micractinium_pusillum
ASV277	22	0	314	0	0	139	64	0	0	137	280	0	0	0	0	0	0	0	0	964	67	41	32	64	39	63	59	0	0	0	15	45	84	0	0	0	0	36	0	p__Dinophyta	g__Unruhdinium	s__Unruhdinium_penardii
ASV2763	0	0	0	124	0	0	0	0	0	0	0	0	0	0	0	0	0	0	0	0	0	0	0	0	0	0	0	0	0	0	0	0	0	0	0	0	0	0	0	p__Bacillariophyta	g__Diatoma	s__Diatoma_tenuis
ASV2757	0	0	0	0	0	0	0	0	0	0	109	0	0	0	0	0	0	0	0	0	0	0	0	0	0	0	0	15	0	0	0	0	0	0	0	0	0	0	0	p__Cryptophyta	g__Goniomonas	s__Cryptomonas_pyrenoidifera
ASV2753	0	0	0	0	0	0	0	0	0	0	0	0	0	0	0	0	0	0	0	0	0	0	0	0	0	0	0	0	0	0	0	125	0	0	0	0	0	0	0	p__Chlorophyta	g__Pandorina	s__Pandorina_morum
ASV2750	0	0	0	0	0	0	30	0	0	0	0	0	0	0	0	0	0	0	0	0	25	0	8	0	0	23	0	11	0	0	0	0	0	0	0	19	0	9	0	p__Ciliophora	g__Gonostomum	s__Gonostomum_strenuum
ASV2745	0	0	0	0	0	0	0	0	0	80	0	0	0	0	0	0	0	0	0	0	0	0	0	0	0	0	0	0	0	0	0	0	0	0	0	0	0	0	45	p__Cryptophyta	g__Goniomonas	s__Goniomonas_truncata
ASV2742	0	0	0	0	0	0	0	0	0	0	0	0	0	0	0	0	0	0	0	0	0	0	0	0	0	0	0	0	0	13	90	0	0	23	0	0	0	0	0	p__Chrysophyta	g__Mallomonas	s__Mallomonas_caudata
ASV274	0	0	0	0	0	0	19	0	78	161	362	168	372	222	0	0	640	0	0	0	0	0	0	0	0	0	14	24	0	0	133	26	0	0	39	0	131	86	36	p__Bacillariophyta	g__Gomphonema	s__Gomphonema_parvulum
ASV2730	0	0	0	0	0	0	0	0	0	0	0	0	0	0	0	0	0	0	0	0	0	0	0	0	0	0	0	0	0	0	0	0	0	0	0	0	0	0	127	p__Ciliophora	g__Anteholosticha	s__Anteholosticha_monilata
ASV2728	0	0	0	0	0	0	0	0	0	0	0	0	0	0	0	0	0	0	0	0	0	0	0	0	0	10	0	0	0	0	0	0	0	0	14	0	22	33	48	p__Bacillariophyta	g__Fistulifera	s__Fistulifera_pelliculosa
ASV2724	0	0	0	0	0	0	40	0	0	0	0	0	0	0	0	0	0	0	16	0	0	0	10	10	8	0	0	0	0	43	0	0	0	0	0	0	0	0	0	p__Chlorophyta	g__Chlorogonium	s__Chlorogonium_elongatum
ASV272	0	973	153	0	92	0	21	18	129	171	0	0	0	0	356	0	0	0	0	0	0	0	0	0	37	20	0	0	0	0	270	50	0	0	0	0	33	132	65	p__Ciliophora	g__Anteholosticha	s__Anteholosticha_monilata
ASV2717	0	0	0	0	0	0	44	0	0	10	0	0	0	0	0	0	0	0	0	0	0	0	0	0	0	3	10	0	0	0	32	0	0	0	6	0	0	0	22	p__Ciliophora	g__Stylonychia	s__Stylonychia_pustulata
ASV2715	0	0	0	0	0	0	0	0	0	0	0	0	0	0	0	0	0	0	0	0	23	0	0	0	15	23	67	0	0	0	0	0	0	0	0	0	0	0	0	p__Ciliophora	g__Deviata	s__Deviata_parabacilliformis
ASV2711	0	0	0	0	0	0	0	0	0	0	0	0	0	0	0	0	0	0	0	0	0	0	0	0	0	10	0	19	0	0	18	15	0	0	45	0	21	0	0	p__Chlorophyta	g__Deasonia	s__Deasonia_multinucleata
ASV2708	0	0	0	128	0	0	0	0	0	0	0	0	0	0	0	0	0	0	0	0	0	0	0	0	0	0	0	0	0	0	0	0	0	0	0	0	0	0	0	p__Bacillariophyta	g__Thalassiosira	s__Thalassiosira_hendeyi
ASV2699	0	0	0	0	0	0	0	0	0	0	0	0	0	0	0	0	0	0	0	108	0	6	0	0	0	11	0	0	0	0	0	0	0	0	0	0	0	4	0	p__Chlorophyta	g__Chlamydomonas	s__Chlamydomonas_reinhardtii
ASV2697	0	0	0	0	0	0	0	0	0	0	0	0	0	0	0	0	0	0	0	0	33	0	0	0	0	0	36	0	0	0	0	0	60	0	0	0	0	0	0	p__Ciliophora	g__Strobilidium	s__Strobilidium_caudatum
ASV2694	0	0	0	0	0	0	0	0	0	0	0	0	0	0	0	0	0	0	0	0	0	0	0	0	0	0	0	0	6	14	55	54	0	0	0	0	0	0	0	p__Euglenophyta	g__Euglena	s__Euglena_tristella
ASV2690	0	0	0	129	0	0	0	0	0	0	0	0	0	0	0	0	0	0	0	0	0	0	0	0	0	0	0	0	0	0	0	0	0	0	0	0	0	0	0	p__Apicomplexa	g__Hepatozoon	s__Hepatozoon_sipedon
ASV2687	0	0	0	0	0	0	0	0	0	0	0	0	0	0	129	0	0	0	0	0	0	0	0	0	0	0	0	0	0	0	0	0	0	0	0	0	0	0	0	p__Ciliophora	g__Anteholosticha	s__Anteholosticha_monilata
ASV2682	0	0	0	0	0	0	0	0	0	0	0	0	0	0	0	0	0	0	0	0	64	0	20	20	21	5	0	0	0	0	0	0	0	0	0	0	0	0	0	p__Chlorophyta	g__Pedinomonas	s__Pedinomonas_minor
ASV2680	0	0	0	0	0	0	0	0	0	0	0	0	0	0	0	0	0	0	0	0	37	0	0	14	0	0	21	33	0	0	9	0	0	0	16	0	0	0	0	p__Chlorophyta	g__Uronema	s__Uronema_acuminatum
ASV2678	0	0	0	0	0	76	0	0	0	0	0	0	0	0	0	0	0	0	0	0	12	0	14	10	0	11	7	0	0	0	0	0	0	0	0	0	0	0	0	p__Sarcomastigophora	g__Monosiga	s__Monosiga_ovata
ASV2675	0	0	106	0	0	0	0	0	0	0	0	0	0	0	0	0	0	0	0	0	0	0	0	24	0	0	0	0	0	0	0	0	0	0	0	0	0	0	0	p__Bacillariophyta	g__Sellaphora	s__Sellaphora_seminulum
ASV2673	0	0	130	0	0	0	0	0	0	0	0	0	0	0	0	0	0	0	0	0	0	0	0	0	0	0	0	0	0	0	0	0	0	0	0	0	0	0	0	p__Bacillariophyta	g__Campylodiscus	s__Campylodiscus_thuretii
ASV2667	0	0	0	0	0	0	0	0	0	0	0	0	0	0	0	0	0	0	0	0	41	0	22	43	25	0	0	0	0	0	0	0	0	0	0	0	0	0	0	p__Dinophyta	g__Woloszynskia	s__Woloszynskia_leopoliensis
ASV2664	0	0	0	0	0	86	45	0	0	0	0	0	0	0	0	0	0	0	0	0	0	0	0	0	0	0	0	0	0	0	0	0	0	0	0	0	0	0	0	p__Rhodophyta	g__Pyropia	s__Pyropia_yezoensis
ASV2652	0	0	0	0	0	74	0	0	0	0	0	0	0	0	0	0	0	0	0	0	0	0	8	0	0	0	14	0	0	0	20	0	0	0	0	16	0	0	0	p__Dinophyta	g__Woloszynskia	s__Woloszynskia_pascheri
ASV2651	0	0	0	132	0	0	0	0	0	0	0	0	0	0	0	0	0	0	0	0	0	0	0	0	0	0	0	0	0	0	0	0	0	0	0	0	0	0	0	p__Bacillariophyta	g__Thalassiosira	s__Thalassiosira_tenera
ASV265	0	0	0	0	0	0	0	0	0	0	0	0	0	0	0	0	0	0	0	56	96	46	133	823	373	705	127	75	0	0	0	0	0	0	77	0	0	0	111	p__Chlorophyta	g__Actinochloris	s__Actinochloris_sphaerica
ASV2647	0	0	0	0	0	0	0	0	0	0	0	0	0	0	0	25	107	0	0	0	0	0	0	0	0	0	0	0	0	0	0	0	0	0	0	0	0	0	0	p__Chrysophyta	g__Ochromonas	s__Ochromonas_danica
ASV2637	0	0	0	0	0	0	0	0	0	0	0	0	0	0	0	0	0	0	0	113	0	16	0	0	0	0	0	0	0	0	0	4	0	0	0	0	0	0	0	p__Chlorophyta	g__Carteria	s__Carteria_crucifera
ASV2636	0	0	0	0	0	0	0	0	0	0	0	0	0	0	0	0	0	0	0	0	0	0	0	0	0	0	0	12	0	10	16	59	0	0	0	0	0	36	0	p__Euglenophyta	g__Euglenaria	s__Euglenaria_clavata
ASV2635	0	0	0	0	0	0	34	0	0	0	0	0	0	0	0	0	0	0	0	0	0	0	0	0	0	0	0	0	0	0	0	0	0	0	20	0	0	0	79	p__Sarcomastigophora	g__Parabodo	s__Parabodo_caudatus
ASV2634	0	0	0	60	0	0	0	0	0	0	0	0	0	0	0	0	0	0	0	0	0	0	0	0	0	0	0	0	0	0	0	0	0	0	0	0	0	0	73	p__Ciliophora	g__Meseres	s__Meseres_corlissi
ASV2633	0	0	0	133	0	0	0	0	0	0	0	0	0	0	0	0	0	0	0	0	0	0	0	0	0	0	0	0	0	0	0	0	0	0	0	0	0	0	0	p__Bacillariophyta	g__Thalassiosira	s__Thalassiosira_hendeyi
ASV2622	0	0	0	0	0	0	0	0	0	0	0	0	0	0	0	0	0	0	0	0	86	0	0	34	0	0	14	0	0	0	0	0	0	0	0	0	0	0	0	p__Chlorophyta	g__Chlamydomonas	s__Chlamydomonas_bacca
ASV2621	0	0	0	0	0	0	0	0	0	0	0	0	0	0	0	0	0	0	0	0	0	0	0	0	0	5	0	0	0	0	0	0	0	0	0	15	86	28	0	p__Chlorophyta	g__Monomastix	s__Monomastix_minuta
ASV2620	0	0	0	0	0	0	0	0	0	0	0	0	0	0	0	0	0	0	0	0	0	0	0	0	0	0	0	0	0	0	0	0	0	47	87	0	0	0	0	p__Rotifera	g__Mytilina	s__Mytilina_ventralis
ASV2617	0	115	0	0	0	0	0	0	0	0	0	0	0	0	0	0	0	0	0	0	0	19	0	0	0	0	0	0	0	0	0	0	0	0	0	0	0	0	0	p__Bacillariophyta	g__Gomphonema	s__Gomphonema_parvulum
ASV2612	0	0	0	0	0	0	0	0	0	0	0	134	0	0	0	0	0	0	0	0	0	0	0	0	0	0	0	0	0	0	0	0	0	0	0	0	0	0	0	p__Chlorophyta	g__Oocystella	s__Oocystella_oogama
ASV2609	0	0	0	0	0	0	0	0	134	0	0	0	0	0	0	0	0	0	0	0	0	0	0	0	0	0	0	0	0	0	0	0	0	0	0	0	0	0	0	p__Bacillariophyta	g__Rhopalodia	s__Rhopalodia_gibba
ASV2608	0	0	0	0	0	0	0	0	0	0	0	0	0	0	0	0	0	0	0	0	0	32	31	0	0	17	18	0	0	9	0	0	0	0	0	0	0	3	25	p__Sarcomastigophora	g__Angomonas	s__Angomonas_deanei
ASV2602	0	0	84	0	0	0	0	46	0	0	0	0	0	0	0	0	0	0	0	0	0	0	0	0	0	0	0	0	0	0	0	0	0	0	0	0	5	0	0	p__Sarcomastigophora	g__Cryptodifflugia	s__Cryptodifflugia_oviformis
ASV26	0	0	0	223	713	397	0	122	0	285	160	0	226	219	96	89	1424	0	378	0	212	0	122	155	179	128	261	127	12578	334	71	208	0	29	33	139	125	60	184	p__Chrysophyta	g__Poteriospumella	s__Poteriospumella_lacustris
ASV2598	0	0	0	0	0	0	0	0	0	0	0	113	0	0	0	0	0	0	0	0	0	0	0	0	0	0	0	0	0	22	0	0	0	0	0	0	0	0	0	p__Ciliophora	g__Arcuospathidium	s__Arcuospathidium_muscorum
ASV2596	0	0	0	0	0	0	0	0	0	30	0	0	0	0	0	0	0	0	30	0	0	0	0	0	0	0	14	0	0	16	18	0	0	0	0	0	0	27	0	p__Ciliophora	g__Hemiophrys	s__Hemiophrys_procera
ASV2595	0	0	0	0	0	0	0	0	0	0	0	0	0	0	0	0	0	0	0	0	0	0	39	97	0	0	0	0	0	0	0	0	0	0	0	0	0	0	0	p__Bacillariophyta	g__Cyclotella	s__Cyclotella_scaldensis
ASV2593	0	0	0	0	0	0	0	0	0	0	0	0	0	0	0	0	0	0	0	0	0	0	0	0	0	0	0	0	0	0	0	0	0	0	0	0	0	0	136	p__Chlorophyta	g__Chlamydomonas	s__Chlamydomonas_moewusii
ASV2592	0	0	0	0	0	0	0	0	0	0	0	0	0	0	0	0	0	0	0	0	84	0	0	0	0	10	0	0	0	42	0	0	0	0	0	0	0	0	0	p__Chlorophyta	g__Chlamydomonas	s__Chlamydomonas_incerta
ASV2591	0	0	0	136	0	0	0	0	0	0	0	0	0	0	0	0	0	0	0	0	0	0	0	0	0	0	0	0	0	0	0	0	0	0	0	0	0	0	0	p__Cryptophyta	g__Goniomonas	s__Cryptomonas_ovata
ASV2586	0	0	0	0	0	0	0	0	0	0	0	0	0	0	0	0	136	0	0	0	0	0	0	0	0	0	0	0	0	0	0	0	0	0	0	0	0	0	0	p__Rhodophyta	g__Platysiphonia	s__Platysiphonia_victoriae
ASV2582	0	0	0	0	0	0	0	0	0	0	0	0	0	0	0	0	0	0	0	0	0	0	0	0	0	0	0	0	0	0	0	0	0	0	0	0	80	57	0	p__Bacillariophyta	g__Navicula	s__Navicula_cari
ASV2577	0	0	0	0	0	0	137	0	0	0	0	0	0	0	0	0	0	0	0	0	0	0	0	0	0	0	0	0	0	0	0	0	0	0	0	0	0	0	0	p__Bacillariophyta	g__Cyclotella	s__Cyclotella_meneghiniana
ASV2562	0	0	138	0	0	0	0	0	0	0	0	0	0	0	0	0	0	0	0	0	0	0	0	0	0	0	0	0	0	0	0	0	0	0	0	0	0	0	0	p__Bacillariophyta	g__Cymatopleura	s__Cymatopleura_elliptica
ASV2561	0	0	138	0	0	0	0	0	0	0	0	0	0	0	0	0	0	0	0	0	0	0	0	0	0	0	0	0	0	0	0	0	0	0	0	0	0	0	0	p__Bacillariophyta	g__Cyclotella	s__Cyclotella_scaldensis
ASV2560	0	82	0	0	0	0	0	0	0	0	0	0	0	0	0	0	0	0	0	0	0	0	0	0	0	0	0	0	0	0	0	38	18	0	0	0	0	0	0	p__Sarcomastigophora	g__Salpingoeca	s__Salpingoeca_urceolata
ASV2559	42	0	0	0	0	0	7	0	0	0	0	0	0	0	0	0	0	0	15	0	0	0	0	6	5	0	0	0	0	0	4	0	0	0	0	0	45	14	0	p__Cryptophyta	g__Goniomonas	s__Cryptomonas_pyrenoidifera
ASV2557	0	0	0	0	0	0	0	0	0	0	138	0	0	0	0	0	0	0	0	0	0	0	0	0	0	0	0	0	0	0	0	0	0	0	0	0	0	0	0	p__Arthropoda	g__Eucyclops	s__Eucyclops_speratus
ASV2554	0	0	0	0	0	0	0	0	0	0	0	0	0	0	0	0	0	0	0	0	33	0	0	20	0	30	41	0	0	0	0	0	0	0	0	0	15	0	0	p__Chrysophyta	g__Mallomonas	s__Mallomonas_papillosa
ASV2546	0	107	0	0	0	0	0	0	0	0	0	0	0	0	0	0	0	0	0	0	3	0	7	22	0	0	0	0	0	0	0	0	0	0	0	0	0	0	0	p__Arthropoda	g__Bosmina	s__Bosmina_longirostris
ASV2544	0	0	0	0	0	0	0	0	0	0	0	0	0	0	139	0	0	0	0	0	0	0	0	0	0	0	0	0	0	0	0	0	0	0	0	0	0	0	0	p__Arthropoda	g__Acroperus	s__Acroperus_harpae
ASV2539	0	0	0	0	0	0	0	0	0	0	0	0	0	0	0	0	0	0	0	0	0	0	0	16	0	0	20	0	0	0	0	0	0	0	33	0	71	0	0	p__Chlorophyta	g__Neospongiococcum	s__Neospongiococcum_alabamense
ASV2528	0	0	0	0	0	0	0	0	129	0	0	0	0	0	0	0	0	0	0	0	0	0	0	0	0	0	0	0	0	0	0	0	0	0	0	0	11	0	0	p__Apicomplexa	g__Klossia	s__Klossia_helicina
ASV2525	0	0	0	24	0	0	0	0	0	0	0	0	0	0	0	0	0	0	0	0	21	0	0	7	27	16	29	0	0	0	17	0	0	0	0	0	0	0	0	p__Ciliophora	g__Dexiotricha	s__Dexiotricha_granulosa
ASV2519	30	0	0	0	0	0	0	0	0	30	81	0	0	0	0	0	0	0	0	0	0	0	0	0	0	0	0	0	0	0	0	0	0	0	0	0	0	0	0	p__Cryptophyta	g__Goniomonas	s__Cryptomonas_curvata
ASV2514	122	0	0	0	0	0	0	0	0	0	0	0	0	0	0	0	0	0	0	0	0	0	0	0	9	0	11	0	0	0	0	0	0	0	0	0	0	0	0	p__Chrysophyta	g__Synura	s__Synura_uvella
ASV251	0	0	0	0	0	0	0	0	0	2780	0	0	0	0	0	0	0	0	0	0	0	0	0	0	0	0	0	0	0	0	0	0	0	6	0	0	0	0	0	p__Chlorophyta	g__Chara	s__Chara_vulgaris
ASV2507	0	0	0	0	0	0	56	10	0	51	0	0	0	0	0	0	0	0	11	0	0	0	0	0	0	0	0	0	0	14	0	0	0	0	0	0	0	0	0	p__Sarcomastigophora	g__Desmarella	s__Desmarella_moniliformis
ASV2505	0	0	0	0	0	0	0	0	0	0	0	0	0	0	0	0	0	0	0	0	0	0	0	0	0	28	23	0	0	0	25	0	0	0	22	0	37	8	0	p__Sarcomastigophora	g__Angulamoeba	s__Angulamoeba_microcystivorans
ASV2504	0	0	0	0	0	0	0	0	0	0	0	0	0	0	0	0	0	0	0	0	0	0	0	6	0	0	8	0	0	19	15	15	6	30	0	0	31	13	0	p__Dinophyta	g__Woloszynskia	s__Woloszynskia_leopoliensis
ASV2502	0	0	0	0	0	0	0	0	0	0	0	0	0	0	0	0	0	0	0	0	0	0	0	0	0	0	0	10	0	0	47	47	0	0	0	0	16	0	23	p__Euglenophyta	g__Euglena	s__Euglena_tristella
ASV2501	0	0	0	0	0	0	0	0	0	0	0	0	0	0	0	0	0	0	0	0	2	0	2	2	15	12	18	8	26	14	27	0	0	17	0	0	0	0	0	p__Ciliophora	g__Urceolaria	s__Urceolaria_korschelti
ASV250	16	207	179	0	196	0	0	8	0	0	30	1008	0	0	740	47	50	277	55	0	0	0	0	0	0	0	0	0	0	0	0	0	0	0	0	15	0	0	0	p__Chlorophyta	g__Planktochlorella	s__Planktochlorella_nurekis
ASV25	0	0	0	0	0	0	0	0	0	0	0	0	0	0	2086	0	0	0	0	16399	210	889	90	105	76	237	365	232	0	49	328	397	48	28	0	23	21	278	34	p__Chlorophyta	g__Hafniomonas	s__Hafniomonas_montana
ASV248	0	158	817	358	287	61	88	34	59	549	0	0	0	0	0	49	0	0	0	0	0	0	0	28	19	0	0	0	0	330	0	0	0	0	0	0	0	0	0	p__Bacillariophyta	g__Discostella	s__Discostella_woltereckii
ASV2474	0	0	0	0	0	0	0	0	0	0	0	0	0	145	0	0	0	0	0	0	0	0	0	0	0	0	0	0	0	0	0	0	0	0	0	0	0	0	0	p__Sarcomastigophora	g__Vermistella	s__Vermistella_antarctica
ASV2468	0	0	0	0	0	0	0	0	0	0	0	0	0	0	0	0	0	0	0	0	15	0	0	17	0	9	0	31	37	0	0	0	0	0	37	0	0	0	0	p__Chlorophyta	g__Chlorococcum	s__Chlorococcum_echinozygotum
ASV2467	0	0	0	66	0	0	0	0	0	0	0	0	0	0	0	0	0	0	0	8	0	0	8	21	13	5	13	7	5	0	0	0	0	0	0	0	0	0	0	p__Bacillariophyta	g__Planothidium	s__Planothidium_lanceolatum
ASV2466	0	0	0	0	0	0	0	0	0	0	0	0	146	0	0	0	0	0	0	0	0	0	0	0	0	0	0	0	0	0	0	0	0	0	0	0	0	0	0	p__Sarcomastigophora	g__Korotnevella	s__Korotnevella_jeppesenii
ASV2463	0	0	0	0	0	0	0	0	146	0	0	0	0	0	0	0	0	0	0	0	0	0	0	0	0	0	0	0	0	0	0	0	0	0	0	0	0	0	0	p__Chlorophyta	g__Ulvella	s__Ulvella_bullata
ASV2462	0	0	0	0	0	0	0	0	0	0	0	0	0	0	0	0	0	0	0	0	43	0	22	30	17	19	16	0	0	0	0	0	0	0	0	0	0	0	0	p__Chlorophyta	g__Didymogenes	s__Didymogenes_sphaerica
ASV2461	0	0	0	0	0	0	0	0	0	0	0	0	0	0	0	0	0	0	0	0	0	0	0	0	0	15	0	0	0	0	0	0	0	0	18	0	32	14	68	p__Chlorophyta	g__Gloeotilopsis	s__Gloeotilopsis_planctonica
ASV2459	0	0	0	0	147	0	0	0	0	0	0	0	0	0	0	0	0	0	0	0	0	0	0	0	0	0	0	0	0	0	0	0	0	0	0	0	0	0	0	p__Sarcomastigophora	g__Korotnevella	s__Korotnevella_stella
ASV2456	25	0	0	0	0	0	0	0	0	0	0	0	0	0	0	0	0	0	0	0	0	0	0	0	0	0	0	0	0	0	0	33	89	0	0	0	0	0	0	p__Chlorophyta	g__Wislouchiella	s__Wislouchiella_planctonica
ASV2455	45	0	0	0	0	0	0	0	0	0	0	0	0	0	0	0	0	0	0	0	0	0	8	0	0	0	9	0	6	0	14	25	0	22	0	0	11	7	0	p__Chrysophyta	g__Ochromonas	s__Ochromonas_marina
ASV2452	0	0	0	0	0	0	0	0	0	0	0	0	0	0	86	0	0	0	0	0	0	0	0	0	0	4	0	0	0	0	18	15	0	0	0	0	0	4	20	p__Rhodophyta	g__Sporolithon	s__Sporolithon_ptychoides
ASV245	0	0	0	0	0	0	0	0	0	0	0	0	0	0	0	0	0	0	0	0	136	0	130	173	185	283	354	238	460	929	0	0	0	0	0	0	0	0	0	p__Bacillariophyta	g__Cyclotella	s__Cyclotella_scaldensis
ASV2449	72	0	0	0	0	0	25	0	0	25	0	0	0	0	0	0	0	0	0	7	0	0	0	0	0	0	0	7	0	0	0	0	0	0	0	11	0	0	0	p__Cryptophyta	g__Goniomonas	s__Cryptomonas_tetrapyrenoidosa
ASV2446	0	0	0	0	0	0	0	0	0	0	0	0	0	0	0	0	0	0	0	0	0	0	0	0	17	0	0	0	0	18	50	30	33	0	0	0	0	0	0	p__Chlorophyta	g__Wislouchiella	s__Wislouchiella_planctonica
ASV2428	0	46	0	0	0	30	0	0	73	0	0	0	0	0	0	0	0	0	0	0	0	0	0	0	0	0	0	0	0	0	0	0	0	0	0	0	0	0	0	p__Chlorophyta	g__Chlorella	s__Chlorella_variabilis
ASV2427	0	0	0	0	0	0	0	0	149	0	0	0	0	0	0	0	0	0	0	0	0	0	0	0	0	0	0	0	0	0	0	0	0	0	0	0	0	0	0	p__Chlorophyta	g__Lobochlamys	s__Lobochlamys_culleus
ASV2426	0	0	0	0	0	0	0	0	0	0	0	0	0	0	0	0	0	0	0	0	0	0	21	0	37	50	42	0	0	0	0	0	0	0	0	0	0	0	0	p__Chlorophyta	g__Polyedriopsis	s__Polyedriopsis_spinulosa
ASV2422	0	0	0	0	0	150	0	0	0	0	0	0	0	0	0	0	0	0	0	0	0	0	0	0	0	0	0	0	0	0	0	0	0	0	0	0	0	0	0	p__Cryptophyta	g__Chroomonas	s__Chroomonas_vectensis
ASV242	0	280	212	307	80	133	252	0	0	93	0	0	0	0	0	0	0	0	0	0	90	0	135	187	88	93	231	74	59	628	0	0	0	0	0	0	0	0	0	p__Bacillariophyta	g__Cyclotella	s__Cyclotella_meneghiniana
ASV2419	0	0	0	0	0	0	45	0	0	23	0	0	0	0	0	0	24	0	32	0	26	0	0	0	0	0	0	0	0	0	0	0	0	0	0	0	0	0	0	p__Sarcomastigophora	g__Neobodo	s__Neobodo_designis
ASV2413	0	0	0	0	0	0	43	0	0	0	0	0	0	0	0	0	0	0	0	0	0	0	0	0	0	17	0	0	0	0	0	0	0	29	26	0	25	11	0	p__Dinophyta	g__Woloszynskia	s__Woloszynskia_leopoliensis
ASV2404	0	0	0	0	0	0	0	0	0	0	0	0	0	0	0	0	0	0	0	0	0	0	43	76	33	0	0	0	0	0	0	0	0	0	0	0	0	0	0	p__Chlorophyta	g__Chlamydomonas	s__Chlamydomonas_reinhardtii
ASV2402	0	0	0	0	0	0	0	0	0	0	0	0	0	0	0	0	0	0	0	0	0	0	0	0	0	54	47	0	14	0	0	0	0	0	19	0	18	0	0	p__Chlorophyta	g__Chlamydomonas	s__Chlamydomonas_moewusii
ASV240	0	0	0	0	0	0	0	0	0	0	0	0	0	0	0	0	0	0	0	0	898	0	444	529	274	466	238	74	56	0	0	0	0	0	0	0	0	0	0	p__Chlorophyta	g__Coelastrella	s__Coelastrella_aeroterrestrica
ASV2399	0	61	0	0	0	0	0	0	0	0	0	0	0	0	0	0	0	0	0	0	29	0	0	32	15	0	0	0	15	0	0	0	0	0	0	0	0	0	0	p__Chlorophyta	g__Desmodesmus	s__Desmodesmus_pannonicus
ASV2393	0	0	0	0	0	0	0	0	0	0	0	0	152	0	0	0	0	0	0	0	0	0	0	0	0	0	0	0	0	0	0	0	0	0	0	0	0	0	0	p__Chlorophyta	g__Pandorina	s__Pandorina_morum
ASV2391	24	0	16	0	0	0	11	4	14	44	0	0	0	0	0	0	0	0	0	0	18	0	0	0	0	0	0	0	0	0	21	0	0	0	0	0	0	0	0	p__Sarcomastigophora	g__Zelonia	s__Zelonia_costaricensis
ASV239	0	0	0	301	0	0	0	0	0	0	149	0	0	0	0	0	0	0	84	1086	48	58	28	58	93	150	340	486	30	15	13	5	0	12	20	4	0	0	0	p__Chlorophyta	g__Nephroselmis	s__Nephroselmis_olivacea
ASV2386	0	0	0	87	0	0	0	0	0	0	0	0	0	0	0	0	0	0	0	0	24	0	0	20	0	0	22	0	0	0	0	0	0	0	0	0	0	0	0	p__Ciliophora	g__Protocyclidium	s__Protocyclidium_citrullus
ASV2385	0	153	0	0	0	0	0	0	0	0	0	0	0	0	0	0	0	0	0	0	0	0	0	0	0	0	0	0	0	0	0	0	0	0	0	0	0	0	0	p__Bacillariophyta	g__Amphora	s__Amphora_coffeiformis
ASV2384	0	0	0	0	0	0	0	0	0	0	0	0	0	0	0	0	0	0	10	0	7	8	12	13	17	9	8	0	0	0	15	13	0	0	0	8	17	0	16	p__Sarcomastigophora	g__Klosteria	s__Klosteria_bodomorphis
ASV2374	0	0	0	0	0	0	0	0	74	0	0	0	0	0	0	0	0	0	0	0	0	0	0	0	0	0	0	0	0	29	0	0	0	0	23	0	17	0	11	p__Chlorophyta	g__Lobomonas	s__Lobomonas_monstruosa
ASV2369	0	0	0	0	0	0	0	0	0	0	0	0	0	0	0	0	155	0	0	0	0	0	0	0	0	0	0	0	0	0	0	0	0	0	0	0	0	0	0	p__Apicomplexa	g__Hepatozoon	s__Hepatozoon_sipedon
ASV2363	0	0	0	0	0	0	33	0	0	0	0	0	0	0	0	0	0	0	0	0	0	0	0	54	0	0	69	0	0	0	0	0	0	0	0	0	0	0	0	p__Bacillariophyta	g__Cyclotella	s__Cyclotella_scaldensis
ASV2360	0	0	0	0	0	0	0	0	0	0	0	0	0	0	156	0	0	0	0	0	0	0	0	0	0	0	0	0	0	0	0	0	0	0	0	0	0	0	0	p__Sarcomastigophora	g__Angulamoeba	s__Angulamoeba_fungorum
ASV2354	0	0	0	0	0	0	0	0	0	0	0	0	0	0	0	0	0	0	0	0	15	0	27	0	31	0	18	0	0	0	26	0	0	0	0	40	0	0	0	p__Ciliophora	g__Cyclidium	s__Cyclidium_glaucoma
ASV2353	0	0	0	0	0	0	0	0	0	0	0	0	0	0	0	0	0	0	0	0	9	0	0	0	0	0	0	7	0	8	51	82	0	0	0	0	0	0	0	p__Euglenophyta	g__Trachelomonas	s__Trachelomonas_planctonica
ASV2346	0	0	0	0	0	0	0	0	0	0	157	0	0	0	0	0	0	0	0	0	0	0	0	0	0	0	0	0	0	0	0	0	0	0	0	0	0	0	0	p__Chrysophyta	g__Mallomonas	s__Mallomonas_tonsurata
ASV2339	0	0	0	0	0	0	0	0	0	8	0	0	0	0	0	0	0	0	0	0	0	0	0	0	0	0	13	15	24	0	50	22	0	0	18	0	0	8	0	p__Chlorophyta	g__Desmodesmus	s__Desmodesmus_abundans
ASV2337	0	0	0	0	0	0	0	0	0	0	0	0	0	0	0	0	0	0	0	0	0	0	0	76	0	0	79	0	0	0	0	0	4	0	0	0	0	0	0	p__Rotifera	g__Testudinella	s__Testudinella_patina
ASV2327	0	0	0	0	0	0	0	0	0	0	0	0	0	0	0	0	0	0	0	0	28	0	24	13	33	26	36	0	0	0	0	0	0	0	0	0	0	0	0	p__Ciliophora	g__Trichodina	s__Trichodina_meretricis
ASV2326	0	0	0	0	0	0	0	0	0	0	0	0	0	0	0	0	0	0	0	0	18	0	13	23	12	18	15	16	0	37	8	0	0	0	0	0	0	0	0	p__Chlorophyta	g__Tetracystis	s__Tetracystis_intermedia
ASV2325	0	0	0	0	0	0	0	0	0	0	0	0	0	0	0	0	0	0	0	0	17	0	0	13	0	9	28	18	13	52	10	0	0	0	0	0	0	0	0	p__Chlorophyta	g__Chlamydomonas	s__Chlamydomonas_splendida
ASV2324	0	0	0	41	0	0	0	23	0	0	0	0	0	0	0	0	0	0	0	0	0	0	0	0	0	0	0	0	0	0	0	0	0	0	36	0	33	0	27	p__Ciliophora	g__Tetrahymena	s__Tetrahymena_empidokyrea
ASV2320	0	0	0	0	0	0	0	0	0	0	0	160	0	0	0	0	0	0	0	0	0	0	0	0	0	0	0	0	0	0	0	0	0	0	0	0	0	0	0	p__Rhodophyta	g__Pyropia	s__Pyropia_yezoensis
ASV2317	0	0	0	0	0	0	0	0	46	0	0	0	0	0	0	0	0	0	0	0	14	0	7	16	7	14	7	17	0	24	8	0	0	0	0	0	0	0	0	p__Chlorophyta	g__Nephroselmis	s__Nephroselmis_olivacea
ASV2314	0	0	0	0	0	0	0	0	0	0	0	0	0	0	0	0	0	0	0	0	81	0	35	0	0	0	0	0	0	0	0	0	0	0	0	45	0	0	0	p__Ciliophora	g__Oxytricha	s__Oxytricha_granulifera
ASV2311	0	0	0	161	0	0	0	0	0	0	0	0	0	0	0	0	0	0	0	0	0	0	0	0	0	0	0	0	0	0	0	0	0	0	0	0	0	0	0	p__Bacillariophyta	g__Cymatopleura	s__Cymatopleura_solea
ASV2309	161	0	0	0	0	0	0	0	0	0	0	0	0	0	0	0	0	0	0	0	0	0	0	0	0	0	0	0	0	0	0	0	0	0	0	0	0	0	0	p__Ciliophora	g__Arcuospathidium	s__Arcuospathidium_cultriforme
ASV2303	0	162	0	0	0	0	0	0	0	0	0	0	0	0	0	0	0	0	0	0	0	0	0	0	0	0	0	0	0	0	0	0	0	0	0	0	0	0	0	p__Chlorophyta	g__Phyllosiphon	s__Phyllosiphon_arisari
ASV2300	0	0	0	0	0	0	0	0	0	0	0	0	0	162	0	0	0	0	0	0	0	0	0	0	0	0	0	0	0	0	0	0	0	0	0	0	0	0	0	p__Ciliophora	g__Protogastrostyla	s__Protogastrostyla_sterkii
ASV23	1685	69	0	1329	0	252	1830	56	1480	635	82	0	0	0	0	105	121	0	400	10	738	44	706	866	737	988	917	825	33	483	369	615	738	2549	316	349	3286	749	43	p__Cryptophyta	g__Goniomonas	s__Cryptomonas_pyrenoidifera
ASV2299	0	0	0	0	0	0	0	0	0	54	0	0	0	0	0	0	0	0	0	0	0	6	0	0	0	0	0	0	0	0	31	0	0	0	0	27	33	0	11	p__Bacillariophyta	g__Synedra	s__Synedra_angustissima
ASV2298	0	0	0	0	0	58	0	0	0	104	0	0	0	0	0	0	0	0	0	0	0	0	0	0	0	0	0	0	0	0	0	0	0	0	0	0	0	0	0	p__Chrysophyta	g__Ochromonas	s__Ochromonas_danica
ASV2295	0	0	0	0	0	0	0	0	0	0	0	0	0	0	0	0	0	0	0	0	64	0	0	26	0	0	0	13	14	13	23	10	0	0	0	0	0	0	0	p__Chlorophyta	g__Gungnir	s__Gungnir_neglectum
ASV2294	0	0	0	0	0	0	0	0	0	0	0	0	0	0	0	0	0	0	0	0	0	0	0	0	15	23	65	6	0	0	16	0	0	0	38	0	0	0	0	p__Ciliophora	g__Frontonia	s__Frontonia_pusilla
ASV2285	0	0	0	0	0	0	0	0	0	0	0	0	0	0	0	0	0	0	0	0	0	0	0	0	0	0	0	0	0	0	0	0	0	0	0	0	21	9	134	p__Chrysophyta	g__Synura	s__Synura_curtispina
ASV2272	0	0	0	0	0	0	0	0	82	21	0	0	0	0	0	0	0	0	0	0	0	0	0	0	10	0	19	0	0	0	11	0	0	0	0	0	21	0	0	p__Ciliophora	g__Neourostylopsis	s__Neourostylopsis_orientalis
ASV227	0	0	0	0	0	0	0	0	0	0	0	0	0	0	0	0	0	0	0	0	0	0	0	0	237	499	174	0	0	0	0	0	0	0	1019	38	674	290	189	p__Chlorophyta	g__Chlamydomonas	s__Chlamydomonas_moewusii
ASV2268	0	0	0	0	0	74	0	0	0	0	0	0	0	0	0	0	0	0	0	0	28	0	0	0	14	0	20	16	13	0	0	0	0	0	0	0	0	0	0	p__Chlorophyta	g__Coccomyxa	s__Coccomyxa_parasitica
ASV2263	0	0	0	0	0	70	0	0	0	0	0	0	0	0	0	0	0	0	0	0	0	0	0	0	0	16	11	44	0	0	0	0	0	0	0	0	25	0	0	p__Cryptophyta	g__Goniomonas	s__Cryptomonas_paramecium
ASV2259	0	0	0	0	0	0	0	0	0	0	0	0	0	0	0	0	0	0	0	0	0	0	11	21	24	68	43	0	0	0	0	0	0	0	0	0	0	0	0	p__Ciliophora	g__Novistrombidium	s__Novistrombidium_sinicum
ASV2258	0	0	0	0	0	0	0	0	0	0	0	0	0	0	0	0	0	0	0	0	0	0	0	0	0	0	0	0	0	0	67	59	0	0	0	41	0	0	0	p__Chlorophyta	g__Chlamydomonas	s__Chlamydomonas_raudensis
ASV2254	0	53	28	0	0	0	0	0	0	0	0	0	0	0	0	0	0	0	0	0	28	0	0	13	11	0	24	0	0	0	0	0	0	0	10	0	0	0	0	p__Bacillariophyta	g__Synedra	s__Synedra_angustissima
ASV2245	0	0	0	0	0	70	0	0	0	0	0	0	0	0	0	0	0	0	0	0	0	0	45	53	0	0	0	0	0	0	0	0	0	0	0	0	0	0	0	p__Chlorophyta	g__Oocystella	s__Oocystella_heteromucosa
ASV2232	0	0	170	0	0	0	0	0	0	0	0	0	0	0	0	0	0	0	0	0	0	0	0	0	0	0	0	0	0	0	0	0	0	0	0	0	0	0	0	p__Dinophyta	g__Theleodinium	s__Theleodinium_calcisporum
ASV2228	0	0	0	0	0	0	0	0	0	0	0	0	0	0	0	0	0	0	171	0	0	0	0	0	0	0	0	0	0	0	0	0	0	0	0	0	0	0	0	p__Chlorophyta	g__Chlamydomonas	s__Chlamydomonas_debaryana
ASV2227	0	0	0	0	0	0	0	0	0	0	0	0	0	0	0	0	83	0	0	0	0	0	0	0	0	0	0	0	0	0	32	0	0	0	0	0	0	0	56	p__Ciliophora	g__Cyclidium	s__Cyclidium_glaucoma
ASV2223	0	0	0	0	0	0	0	0	0	0	0	0	0	0	0	0	0	0	0	0	16	0	0	33	0	0	0	35	0	52	13	0	0	0	18	0	0	5	0	p__Chlorophyta	g__Polyedriopsis	s__Polyedriopsis_spinulosa
ASV2215	0	0	0	0	0	76	0	0	0	0	0	0	0	0	0	0	0	0	0	0	0	0	0	0	0	40	19	0	0	0	0	0	0	0	0	0	38	0	0	p__Chlorophyta	g__Tetracystis	s__Tetracystis_pampae
ASV2212	0	0	0	0	0	0	9	0	0	28	0	0	136	0	0	0	0	0	0	0	0	0	0	0	0	0	0	0	0	0	0	0	0	0	0	0	0	0	0	p__Ciliophora	g__Stylonychia	s__Stylonychia_lemnae
ASV2210	0	0	0	0	0	0	0	0	0	0	0	0	0	0	0	0	0	0	0	0	69	0	24	28	19	20	14	0	0	0	0	0	0	0	0	0	0	0	0	p__Euglenophyta	g__Euglena	s__Euglena_longa
ASV221	0	0	0	0	0	0	0	0	0	0	0	0	0	0	0	0	0	0	0	392	204	0	372	420	286	277	136	21	0	980	0	0	0	0	126	0	24	0	0	p__Chlorophyta	g__Colemanosphaera	s__Colemanosphaera_charkowiensis
ASV2207	0	0	0	0	0	0	0	0	0	0	0	0	0	0	0	0	0	0	0	0	0	0	0	0	0	0	0	0	0	36	0	0	138	0	0	0	0	0	0	p__Ciliophora	g__Enchelys	s__Enchelys_gasterosteus
ASV2200	0	0	0	0	0	0	0	0	0	0	0	0	0	0	0	0	0	0	0	0	0	22	5	0	0	8	0	13	0	0	48	32	0	6	0	3	0	11	27	p__Bacillariophyta	g__Ulnaria	s__Ulnaria_delicatissima
ASV220	0	0	193	91	469	0	5	0	0	0	121	2120	0	102	99	0	0	0	87	0	0	0	0	0	0	0	0	0	0	0	0	0	0	0	0	0	0	0	0	p__Chlorophyta	g__Oocystella	s__Oocystella_oogama
ASV22	0	933	2303	335	567	435	993	167	31	83	318	0	0	0	0	0	0	0	10	0	214	20	335	582	671	774	829	288	110	3077	295	70	0	239	1648	1641	2400	4532	48	p__Bacillariophyta	g__Thalassiosira	s__Thalassiosira_tenera
ASV2185	0	0	0	0	0	0	0	0	0	0	0	0	0	0	0	0	0	0	0	0	0	0	0	0	0	0	0	0	0	0	111	43	0	0	0	0	22	0	0	p__Chlorophyta	g__Wislouchiella	s__Wislouchiella_planctonica
ASV2184	0	0	0	0	0	0	0	0	0	0	0	0	0	0	0	0	0	0	0	0	0	0	0	0	0	0	0	10	0	0	18	11	0	80	0	0	30	0	27	p__Chrysophyta	g__Mallomonas	s__Mallomonas_akrokomos
ASV2178	0	0	0	0	0	0	0	0	0	0	0	0	0	0	0	0	176	0	0	0	0	0	0	0	0	0	0	0	0	0	0	0	0	0	0	0	0	0	0	p__Ciliophora	g__Bromeliophrya	s__Bromeliophrya_brasiliensis
ASV2177	0	0	0	0	0	0	0	0	0	0	0	0	0	0	0	67	0	0	0	0	0	0	0	0	0	22	16	0	0	0	0	0	0	0	33	0	0	0	38	p__Chlorophyta	g__Spongiococcum	s__Spongiococcum_tetrasporum
ASV2163	0	0	0	0	178	0	0	0	0	0	0	0	0	0	0	0	0	0	0	0	0	0	0	0	0	0	0	0	0	0	0	0	0	0	0	0	0	0	0	p__Ciliophora	g__Meseres	s__Meseres_corlissi
ASV2162	0	0	0	0	0	0	0	0	0	14	0	0	0	0	123	0	0	0	0	0	0	0	0	0	0	0	23	4	0	0	0	0	0	0	14	0	0	0	0	p__Ciliophora	g__Paraurostyla	s__Paraurostyla_viridis
ASV2160	0	0	0	0	0	0	0	0	0	0	0	0	0	0	0	0	179	0	0	0	0	0	0	0	0	0	0	0	0	0	0	0	0	0	0	0	0	0	0	p__Sarcomastigophora	g__Naegleria	s__Naegleria_fowleri
ASV2154	0	0	0	0	0	0	0	0	0	0	0	0	0	0	0	0	0	0	0	180	0	0	0	0	0	0	0	0	0	0	0	0	0	0	0	0	0	0	0	p__Dinophyta	g__Peridiniopsis	s__Unruhdinium_kevei
ASV2153	0	0	0	0	0	0	0	0	0	0	0	0	0	0	0	0	0	0	0	0	0	0	0	0	0	0	0	0	0	0	0	0	0	0	0	0	49	131	0	p__Ciliophora	g__Parallelostrombidium	s__Parallelostrombidium_paralatum
ASV215	0	215	0	0	0	0	20	0	0	0	0	0	0	0	0	0	0	0	0	0	624	0	343	317	236	280	178	140	113	105	180	129	43	125	116	68	102	54	0	p__Chlorophyta	g__Tetranephris	s__Tetranephris_brasiliensis
ASV2148	0	0	0	0	0	0	0	0	0	0	180	0	0	0	0	0	0	0	0	0	0	0	0	0	0	0	0	0	0	0	0	0	0	0	0	0	0	0	0	p__Dinophyta	g__Unruhdinium	s__Unruhdinium_penardii
ASV2144	0	0	0	0	0	0	0	0	0	0	0	0	0	0	0	0	0	0	0	0	0	0	0	0	3	4	0	43	0	0	0	0	0	0	26	9	0	31	65	p__Chlorophyta	g__Chloroidium	s__Chloroidium_ellipsoideum
ASV2142	0	0	0	0	0	92	0	0	0	0	0	0	0	0	0	0	0	89	0	0	0	0	0	0	0	0	0	0	0	0	0	0	0	0	0	0	0	0	0	p__Ciliophora	g__Stichotricha	s__Stichotricha_aculeata
ASV2139	0	0	0	0	0	0	0	0	0	0	0	0	0	0	0	0	0	0	0	0	0	0	0	0	0	0	0	41	0	0	0	0	141	0	0	0	0	0	0	p__Ciliophora	g__Tachysoma	s__Tachysoma_pellionellum
ASV2138	0	0	0	0	0	0	0	14	0	0	0	0	0	0	0	0	0	0	0	0	0	0	0	13	17	17	10	0	0	0	46	0	0	0	0	0	44	0	21	p__Bacillariophyta	g__Craticula	s__Craticula_molestiformis
ASV2131	0	0	0	0	0	0	0	0	0	0	0	0	0	0	0	0	0	0	0	0	0	0	0	0	10	20	0	0	0	0	0	0	0	17	32	0	31	34	39	p__Chlorophyta	g__Deasonia	s__Deasonia_multinucleata
ASV2130	0	0	0	0	0	0	0	0	0	0	0	0	0	0	0	0	0	0	0	0	0	19	0	0	50	62	22	0	30	0	0	0	0	0	0	0	0	0	0	p__Chlorophyta	g__Eudorina	s__Eudorina_unicocca
ASV2128	0	0	0	0	0	0	0	0	0	0	0	0	0	0	0	0	0	0	0	0	46	0	0	0	18	0	10	25	0	46	0	0	0	0	38	0	0	0	0	p__Ciliophora	g__Tetrahymena	s__Tetrahymena_farahensis
ASV2127	0	0	0	172	0	0	11	0	0	0	0	0	0	0	0	0	0	0	0	0	0	0	0	0	0	0	0	0	0	0	0	0	0	0	0	0	0	0	0	p__Sarcomastigophora	g__Lamproderma	s__Lamproderma_scintillans
ASV2124	0	0	0	0	0	0	0	0	0	0	0	0	0	0	0	0	0	0	0	0	0	0	24	26	18	0	0	27	12	0	77	0	0	0	0	0	0	0	0	p__Bacillariophyta	g__Aulacoseira	s__Aulacoseira_nyassensis
ASV2118	0	0	0	0	0	0	0	0	0	0	0	0	0	0	0	0	0	0	0	0	12	0	0	0	15	0	22	0	0	0	17	14	0	67	38	0	0	0	0	p__Chrysophyta	g__Mallomonas	s__Mallomonas_striata
ASV2109	0	0	0	0	0	0	0	0	185	0	0	0	0	0	0	0	0	0	0	0	0	0	0	0	0	0	0	0	0	0	0	0	0	0	0	0	0	0	0	p__Ciliophora	g__Lacrymaria	s__Lacrymaria_marina
ASV21	61	496	1056	1463	2165	222	368	83	212	203	268	0	0	0	0	0	0	0	46	775	1203	43	1438	1755	1332	1459	1233	585	312	3090	80	103	0	0	668	399	1723	1369	42	p__Bacillariophyta	g__Thalassiosira	s__Thalassiosira_tenera
ASV2095	0	0	0	0	0	0	0	0	0	0	0	0	0	0	0	0	0	0	0	0	0	0	46	14	65	47	16	0	0	0	0	0	0	0	0	0	0	0	0	p__Ciliophora	g__Stokesia	s__Stokesia_vernalis
ASV2092	0	0	0	0	0	0	0	0	0	0	0	0	0	0	0	0	0	0	0	0	0	0	0	0	0	0	40	0	0	58	90	0	0	0	0	0	0	0	0	p__Apicomplexa	g__Lecudina	s__Lecudina_polymorpha
ASV2088	0	0	0	0	0	0	0	0	0	47	0	0	0	0	0	0	0	0	0	0	0	0	70	0	71	0	0	0	0	0	0	0	0	0	0	0	0	0	0	p__Ciliophora	g__Pseudouroleptus	s__Pseudouroleptus_caudatus
ASV2087	0	0	0	0	0	0	0	0	0	0	0	0	0	0	0	0	0	0	0	0	35	15	0	0	0	76	63	0	0	0	0	0	0	0	0	0	0	0	0	p__Chlorophyta	g__Chlamydomonas	s__Chlamydomonas_moewusii
ASV2086	0	0	0	0	0	0	0	0	0	0	0	0	0	0	0	0	0	0	0	0	31	0	0	14	53	56	0	0	0	0	11	0	0	0	0	16	0	8	0	p__Ciliophora	g__Levicoleps	s__Levicoleps_biwae
ASV2081	0	0	0	0	0	0	0	0	0	0	0	0	0	189	0	0	0	0	0	0	0	0	0	0	0	0	0	0	0	0	0	0	0	0	0	0	0	0	0	p__Ciliophora	g__Stentor	s__Stentor_roeselii
ASV2078	0	0	0	0	0	0	14	0	0	0	0	0	0	0	0	0	0	0	0	0	11	0	0	0	0	0	0	22	0	0	52	29	0	0	0	0	62	0	0	p__Chlorophyta	g__Chlorococcum	s__Chlorococcum_oleofaciens
ASV2070	0	0	0	0	0	0	0	0	0	0	0	0	0	0	41	0	0	0	0	0	0	0	0	0	0	9	5	19	0	17	47	17	0	0	0	0	17	0	19	p__Sarcomastigophora	g__Diplonema	s__Diplonema_papillatum
ASV2069	0	0	0	0	0	0	0	0	0	0	0	0	160	0	0	0	0	0	0	0	0	0	0	0	0	0	0	0	0	0	0	0	0	0	0	0	0	31	0	p__Ciliophora	g__Trithigmostoma	s__Trithigmostoma_steini
ASV2068	0	0	0	0	0	0	0	0	0	0	0	0	0	0	0	0	0	0	0	0	24	0	0	30	37	19	82	0	0	0	0	0	0	0	0	0	0	0	0	p__Ciliophora	g__Paramecium	s__Paramecium_polycaryum
ASV2066	0	0	0	0	126	0	24	11	0	0	0	0	0	0	0	0	0	0	0	0	0	0	0	7	0	0	0	0	0	10	0	14	0	0	0	0	0	0	0	p__Sarcomastigophora	g__Salpingoeca	s__Salpingoeca_fusiformis
ASV2063	0	0	0	0	0	0	0	0	0	0	0	0	173	0	0	0	0	0	0	0	0	0	0	0	0	9	0	0	0	0	0	0	0	0	0	0	10	0	0	p__Sarcomastigophora	g__Neobodo	s__Neobodo_designis
ASV2060	0	0	0	0	0	0	0	0	0	0	0	0	0	0	0	0	0	0	0	0	0	0	0	0	0	0	0	0	0	0	0	23	73	0	0	0	97	0	0	p__Rotifera	g__Ascomorpha	s__Ascomorpha_ovalis
ASV206	0	40	0	0	0	0	0	0	0	0	0	0	0	0	0	0	0	0	18	0	41	0	49	56	52	78	70	0	0	19	103	114	0	1087	125	105	1020	520	0	p__Cryptophyta	g__Goniomonas	s__Cryptomonas_marssonii
ASV2059	48	0	0	133	0	0	12	0	0	0	0	0	0	0	0	0	0	0	0	0	0	0	0	0	0	0	0	0	0	0	0	0	0	0	0	0	0	0	0	p__Cryptophyta	g__Goniomonas	s__Cryptomonas_tetrapyrenoidosa
ASV2053	0	108	0	0	0	0	0	0	0	0	0	0	0	0	0	0	0	0	0	0	17	0	15	0	0	8	0	0	0	0	7	8	0	0	6	12	0	0	13	p__Sarcomastigophora	g__Korotnevella	s__Korotnevella_jeppesenii
ASV2043	0	0	0	0	0	0	0	0	0	0	0	0	0	0	0	0	0	0	0	0	22	0	43	81	0	0	34	0	0	0	0	0	0	0	0	17	0	0	0	p__Ciliophora	g__Halteria	s__Halteria_grandinella
ASV2041	0	0	0	0	0	131	0	18	0	0	0	0	0	0	0	0	0	0	0	0	0	0	0	0	18	0	0	0	30	0	0	0	0	0	0	0	0	0	0	p__Chrysophyta	g__Poteriospumella	s__Poteriospumella_lacustris
ASV2035	0	0	0	0	0	0	0	0	0	0	0	0	0	0	0	0	0	0	0	0	5	0	0	19	10	32	16	24	16	7	29	7	0	3	7	0	23	0	0	p__Chlorophyta	g__Chlamydomonas	s__Chlamydomonas_sphaeroides
ASV2020	0	0	0	0	0	0	0	25	0	0	0	0	0	0	0	0	0	0	0	0	0	0	0	0	51	31	29	0	0	25	0	0	39	0	0	0	0	0	0	p__Rotifera	g__Synchaeta	s__Synchaeta_pectinata
ASV202	0	0	0	102	0	0	0	0	40	60	0	0	0	0	0	0	0	0	0	0	54	18	118	203	72	143	67	23	6	18	91	46	0	255	286	157	1832	0	0	p__Bacillariophyta	g__Aulacoseira	s__Aulacoseira_nyassensis
ASV2010	0	0	0	0	0	0	44	78	0	0	0	0	0	0	0	0	0	0	0	0	0	0	0	33	0	46	0	0	0	0	0	0	0	0	0	0	0	0	0	p__Ciliophora	g__Pseudouroleptus	s__Pseudouroleptus_caudatus
ASV201	0	3597	0	0	0	0	0	0	0	0	0	0	0	0	0	0	0	0	0	0	0	0	0	0	0	0	0	0	0	0	0	0	0	0	0	0	0	0	0	p__Bacillariophyta	g__Amphora	s__Amphora_coffeiformis
ASV2009	0	160	0	0	0	0	7	0	0	0	0	0	0	0	0	0	0	0	0	0	0	0	0	0	0	0	0	0	0	0	16	0	0	0	0	0	0	0	18	p__Bacillariophyta	g__Nitzschia	s__Nitzschia_frustulum
ASV2001	0	0	0	0	0	0	30	0	45	45	0	0	0	0	0	0	0	0	0	0	0	0	0	0	0	0	0	0	0	13	0	0	0	0	0	0	14	5	50	p__Chrysophyta	g__Chrysamoeba	s__Chrysamoeba_tenera
ASV200	0	0	0	97	0	128	32	11	35	103	0	33	612	302	102	0	983	0	111	0	16	0	9	11	0	0	19	26	594	29	39	54	0	0	0	27	67	37	132	p__Chrysophyta	g__Pedospumella	s__Pedospumella_encystans
ASV20	3194	0	0	245	0	56	415	50	0	425	0	360	0	0	0	0	0	0	37	4753	582	191	375	323	864	917	1290	1224	16	332	1161	2563	3605	2104	163	189	115	145	19	p__Cryptophyta	g__Teleaulax	s__Teleaulax_amphioxeia
ASV1999	0	0	0	0	0	0	0	0	0	0	0	0	0	0	0	0	0	0	0	0	0	0	0	0	204	0	0	0	0	0	0	0	0	0	0	0	0	0	0	p__Ciliophora	g__Stentor	s__Stentor_coeruleus
ASV1994	0	204	0	0	0	0	0	0	0	0	0	0	0	0	0	0	0	0	0	0	0	0	0	0	0	0	0	0	0	0	0	0	0	0	0	0	0	0	0	p__Bacillariophyta	g__Amphora	s__Amphora_coffeiformis
ASV1993	0	0	0	0	0	0	0	0	0	0	0	0	0	0	0	0	0	0	6	0	27	0	32	0	0	0	0	20	0	35	0	24	0	0	0	0	34	0	26	p__Bacillariophyta	g__Thalassiosira	s__Thalassiosira_rotula
ASV1980	0	0	0	0	0	66	89	0	0	0	0	0	0	0	0	0	0	0	0	0	0	0	0	0	0	0	6	33	5	0	4	0	3	0	0	0	0	0	0	p__Rhodophyta	g__Bangia	s__Bangia_fuscopurpurea
ASV1970	0	203	0	0	0	0	0	0	0	0	0	0	0	0	0	0	0	0	0	0	4	0	0	0	0	0	0	0	0	0	0	0	0	0	0	0	0	0	0	p__Chlorophyta	g__Chlamydomonas	s__Chlamydomonas_tetragama
ASV1966	0	0	0	0	0	0	0	0	0	0	0	0	0	0	0	0	0	0	0	0	0	0	45	32	39	52	18	0	0	0	0	0	0	0	22	0	0	0	0	p__Chlorophyta	g__Stauridium	s__Stauridium_tetras
ASV1957	0	0	0	0	210	0	0	0	0	0	0	0	0	0	0	0	0	0	0	0	0	0	0	0	0	0	0	0	0	0	0	0	0	0	0	0	0	0	0	p__Chrysophyta	g__Paraphysomonas	s__Paraphysomonas_imperforata
ASV1954	0	0	0	0	104	0	21	0	0	63	0	0	0	0	0	0	0	0	15	0	0	0	0	0	0	0	0	0	0	0	0	0	0	0	0	0	0	0	8	p__Chlorophyta	g__Monomastix	s__Monomastix_minuta
ASV1948	0	0	0	0	143	0	0	0	0	69	0	0	0	0	0	0	0	0	0	0	0	0	0	0	0	0	0	0	0	0	0	0	0	0	0	0	0	0	0	p__Sarcomastigophora	g__Bodo	s__Bodo_saltans
ASV1942	0	0	0	0	0	0	0	0	0	0	0	0	0	0	163	0	0	0	0	0	0	0	0	0	0	0	0	0	0	0	33	0	0	0	0	0	17	0	0	p__Sarcomastigophora	g__Raperostelium	s__Raperostelium_ohioense
ASV1940	0	0	0	0	0	0	0	0	0	0	0	0	117	0	0	0	0	0	0	0	0	0	0	0	0	0	0	0	0	0	0	0	0	0	0	0	0	35	61	p__Ciliophora	g__Colpidium	s__Colpidium_striatum
ASV194	0	100	0	0	0	162	53	0	286	0	314	0	0	0	0	0	0	0	0	0	0	0	86	49	39	84	0	63	0	0	695	151	0	39	199	126	589	464	269	p__Bacillariophyta	g__Gomphonema	s__Gomphonema_parvulum
ASV1936	0	0	0	0	0	0	0	0	0	0	0	0	0	0	0	0	0	0	0	208	0	0	0	0	0	0	0	0	0	0	0	0	0	0	0	0	0	6	0	p__Chlorophyta	g__Chlamydomonas	s__Chlamydomonas_reinhardtii
ASV1935	0	0	0	0	0	0	0	0	0	0	0	0	0	0	0	0	0	0	0	14	0	0	0	24	25	16	0	0	0	0	0	0	0	0	16	8	53	58	0	p__Chlorophyta	g__Pandorina	s__Pandorina_morum
ASV1930	0	0	0	0	0	0	0	0	0	0	0	0	0	0	0	0	0	0	0	0	52	0	58	63	42	0	0	0	0	0	0	0	0	0	0	0	0	0	0	p__Chlorophyta	g__Chlamydomonas	s__Chlamydomonas_gloeophila
ASV1921	0	0	0	0	0	0	17	0	0	0	0	0	164	0	0	0	0	0	0	0	0	0	0	0	0	0	0	0	0	0	11	0	0	0	0	0	17	7	0	p__Sarcomastigophora	g__Dimastigella	s__Dimastigella_trypaniformis
ASV1911	0	0	0	0	0	0	0	0	0	0	0	0	0	0	0	0	0	0	0	32	12	0	19	0	25	34	18	33	0	20	0	17	8	0	0	0	0	0	0	p__Chlorophyta	g__Gungnir	s__Gungnir_neglectum
ASV191	67	50	0	0	0	0	0	0	0	0	0	0	0	0	0	0	0	0	0	27	544	0	228	221	321	297	241	55	32	0	44	30	17	0	1202	422	24	54	0	p__Chlorophyta	g__Neodesmus	s__Neodesmus_pupukensis
ASV1909	0	0	0	0	0	0	0	0	0	0	0	0	0	0	0	0	207	0	0	0	0	0	11	0	0	0	0	0	0	0	0	0	0	0	0	0	0	0	0	p__Ciliophora	g__Ophryoglena	s__Ophryoglena_catenula
ASV1908	0	0	0	0	0	0	0	0	0	0	0	0	0	0	0	33	0	0	0	0	0	0	10	0	0	0	7	17	0	0	0	0	0	18	0	5	43	25	60	p__Sarcomastigophora	g__Raperostelium	s__Raperostelium_ohioense
ASV1903	0	0	0	0	0	0	0	0	0	0	0	0	0	0	0	0	0	0	0	0	0	0	0	0	10	33	11	0	0	0	0	0	0	12	87	0	32	14	20	p__Chlorophyta	g__Chlorococcum	s__Chlorococcum_isabeliense
ASV1891	0	0	0	0	0	0	0	0	0	0	0	0	0	0	0	0	0	0	0	0	0	0	0	20	0	4	0	0	0	0	0	10	0	0	34	0	42	39	71	p__Apicomplexa	g__Gregarina	s__Gregarina_chortiocetes
ASV1889	0	0	154	0	0	0	66	0	0	0	0	0	0	0	0	0	0	0	0	0	0	0	0	0	0	0	0	0	0	0	0	0	0	0	0	0	0	0	0	p__Rotifera	g__Testudinella	s__Testudinella_patina
ASV1886	0	0	0	0	0	0	0	0	0	0	0	0	0	0	0	0	0	0	0	0	17	0	17	21	0	0	0	0	0	0	0	0	0	0	0	0	115	51	0	p__Chlorophyta	g__Neochlorosarcina	s__Neochlorosarcina_negevensis
ASV1885	0	0	0	0	0	0	0	0	0	0	0	0	0	0	0	0	0	0	0	0	0	0	0	0	20	38	0	0	0	0	0	0	0	16	56	0	30	17	44	p__Chlorophyta	g__Chlorococcum	s__Chlorococcum_echinozygotum
ASV1879	96	0	0	0	0	0	8	0	0	50	0	0	0	0	0	0	0	0	0	0	6	0	3	0	10	0	6	0	0	14	8	8	12	0	0	0	0	0	0	p__Apicomplexa	g__Haemogregarina	s__Haemogregarina_balli
ASV1872	0	0	0	116	0	17	0	0	65	24	0	0	0	0	0	0	0	0	0	0	0	0	0	0	0	0	0	0	0	0	0	0	0	0	0	0	0	0	0	p__Sarcomastigophora	g__Dimastigella	s__Dimastigella_trypaniformis
ASV1857	0	0	0	0	0	0	0	0	0	36	0	0	0	0	0	0	0	0	0	0	0	0	0	0	0	0	0	0	0	0	0	0	0	0	0	0	73	38	77	p__Bacillariophyta	g__Gomphonema	s__Gomphonema_affine
ASV1855	0	0	0	0	0	0	0	0	0	0	0	0	0	0	0	0	0	0	0	0	0	0	0	0	26	47	46	0	0	0	0	0	0	0	74	32	0	0	0	p__Ciliophora	g__Isotricha	s__Isotricha_prostoma
ASV1848	0	0	0	0	0	0	0	0	0	37	0	0	188	0	0	0	0	0	0	0	0	0	0	0	0	0	0	0	0	0	0	0	0	0	0	0	0	0	0	p__Cryptophyta	g__Rhodomonas	s__Rhodomonas_salina
ASV1834	0	0	0	0	0	0	0	0	0	0	0	0	0	0	0	0	0	0	0	0	0	97	0	0	0	0	0	57	0	0	0	0	0	15	0	5	0	29	26	p__Apicomplexa	g__Gregarina	s__Gregarina_chortiocetes
ASV1824	0	0	0	0	0	0	0	0	0	0	0	0	0	0	0	0	0	0	0	0	0	0	0	0	0	0	0	0	0	0	0	0	0	0	231	0	0	0	0	p__Chlorophyta	g__Lobomonas	s__Lobomonas_sphaerica
ASV1822	0	0	0	0	0	0	0	0	0	0	0	0	0	0	0	0	0	0	0	0	0	0	14	17	0	14	6	90	7	9	0	0	0	0	53	0	11	0	10	p__Chlorophyta	g__Deasonia	s__Deasonia_multinucleata
ASV1821	0	0	0	0	0	0	47	0	0	0	0	0	0	0	162	0	0	0	0	0	0	0	0	0	0	0	0	0	0	0	22	0	0	0	0	0	0	0	0	p__Chlorophyta	g__Ulvella	s__Ulvella_bullata
ASV1820	0	0	0	0	0	0	0	0	0	0	0	0	0	0	0	0	0	0	0	0	52	0	37	79	0	64	0	0	0	0	0	0	0	0	0	0	0	0	0	p__Chlorophyta	g__Chloromonas	s__Chloromonas_insignis
ASV182	0	0	72	0	0	40	9	0	0	55	0	0	0	0	0	0	0	0	83	3240	85	151	59	104	34	58	18	15	0	0	0	0	0	8	0	0	0	46	0	p__Chlorophyta	g__Pedinomonas	s__Pedinomonas_minor
ASV1819	0	0	0	0	0	0	0	42	0	0	0	0	0	0	0	0	0	0	0	0	0	0	0	22	14	0	12	89	15	0	0	0	0	0	38	0	0	0	0	p__Chlorophyta	g__Chlorogonium	s__Chlorogonium_capillatum
ASV1818	0	0	0	0	0	0	22	0	0	0	0	0	0	0	0	0	0	0	0	0	18	0	10	14	35	37	45	14	17	0	0	0	0	0	0	0	20	0	0	p__Chlorophyta	g__Chloromonas	s__Chloromonas_vernalis
ASV1816	0	0	75	0	0	37	18	7	0	12	0	0	0	0	0	30	0	0	0	0	0	0	0	0	0	0	0	0	0	0	22	17	0	0	0	0	0	0	14	p__Sarcomastigophora	g__Nuclearia	s__Nuclearia_moebiusi
ASV1814	0	0	0	0	0	0	0	0	0	0	0	0	0	0	0	0	0	0	0	0	42	0	17	47	0	34	18	75	0	0	0	0	0	0	0	0	0	0	0	p__Chlorophyta	g__Pedinomonas	s__Pedinomonas_minor
ASV1813	0	0	21	0	0	0	0	0	0	0	0	0	0	0	0	0	0	0	0	0	28	0	24	19	21	30	15	0	0	59	0	0	0	0	0	0	16	0	0	p__Chlorophyta	g__Didymogenes	s__Didymogenes_sphaerica
ASV181	0	0	0	102	0	0	0	34	0	50	0	0	0	0	0	0	0	0	0	26	0	0	0	0	89	43	201	203	0	55	507	191	2613	0	0	0	0	0	0	p__Rotifera	g__Synchaeta	s__Synchaeta_pectinata
ASV1808	0	0	0	0	0	0	0	0	0	0	0	0	0	0	0	0	0	0	0	0	0	0	32	8	194	0	0	0	0	0	0	0	0	0	0	0	0	0	0	p__Chlorophyta	g__Volvox	s__Volvox_aureus
ASV1807	0	0	0	0	0	0	0	0	0	0	0	0	0	0	0	0	0	0	0	0	49	0	38	87	41	19	0	0	0	0	0	0	0	0	0	0	0	0	0	p__Dinophyta	g__Durinskia	s__Durinskia_baltica
ASV1805	0	0	163	0	0	50	7	14	0	0	0	0	0	0	0	0	0	0	0	0	0	0	0	0	0	0	0	0	0	0	0	0	0	0	0	0	0	0	0	p__Bacillariophyta	g__Fragilaria	s__Fragilaria_barbararum
ASV1802	0	0	0	0	235	0	0	0	0	0	0	0	0	0	0	0	0	0	0	0	0	0	0	0	0	0	0	0	0	0	0	0	0	0	0	0	0	0	0	p__Cryptophyta	g__Goniomonas	s__Cryptomonas_obovoidea
ASV18	22	304	1763	1740	1115	807	3473	972	26	16	0	0	0	0	0	36	0	0	0	15	2361	101	2308	3090	1520	1718	3678	1778	48	1503	142	59	0	30	21	30	33	39	52	p__Bacillariophyta	g__Cyclotella	s__Cyclotella_meneghiniana
ASV1798	0	0	0	0	0	0	0	0	0	0	0	0	0	0	0	0	0	0	0	0	31	0	41	41	44	62	17	0	0	0	0	0	0	0	0	0	0	0	0	p__Ciliophora	g__Cyclidium	s__Cyclidium_glaucoma
ASV1790	0	0	0	0	0	0	0	0	0	33	0	0	0	0	0	0	0	0	0	0	0	0	12	0	0	34	0	22	6	0	41	21	0	8	0	0	38	4	17	p__Chlorophyta	g__Chlamydomonas	s__Chlamydomonas_bacca
ASV179	30	0	0	0	0	131	0	20	203	31	0	0	0	0	0	34	0	0	196	10	0	0	243	141	0	744	613	410	0	0	614	318	0	46	87	0	292	0	0	p__Ciliophora	g__Euplotes	s__Euplotes_woodruffi
ASV1787	0	0	0	0	0	0	0	0	0	0	0	0	0	0	0	0	0	0	0	0	52	0	67	64	15	13	27	0	0	0	0	0	0	0	0	0	0	0	0	p__Chlorophyta	g__Volvox	s__Volvox_gigas
ASV1782	0	0	0	0	0	0	0	0	0	0	0	0	0	0	0	0	0	0	0	0	78	0	39	28	39	31	13	11	0	0	0	0	0	0	0	0	0	0	0	p__Chlorophyta	g__Protodesmus	s__Protodesmus_globulifer
ASV1778	0	0	0	0	0	0	0	0	0	0	0	0	124	0	0	27	38	0	50	0	0	0	0	0	0	0	0	0	0	0	0	0	0	0	0	0	0	0	0	p__Sarcomastigophora	g__Neobodo	s__Neobodo_designis
ASV1774	36	0	81	0	0	0	0	0	0	0	0	0	0	0	0	0	0	0	0	0	18	0	0	0	0	0	7	0	12	12	18	56	0	0	0	0	0	0	0	p__Xanthophyta	g__Monodus	s__Monodus_subterranea
ASV1770	153	0	0	0	0	0	0	20	40	0	0	0	0	0	0	0	0	27	0	0	0	0	0	0	0	0	0	0	0	0	0	0	0	0	0	0	0	0	0	p__Arthropoda	g__Sinocalanus	s__Sinocalanus_sinensis
ASV177	57	0	0	0	0	102	18	0	0	71	0	0	0	0	0	0	2138	0	0	0	33	0	38	102	118	104	76	54	12	44	129	275	99	91	109	495	9	14	70	p__Chrysophyta	g__Chromophyton	s__Chromophyton_vischeri
ASV1767	0	0	0	0	0	0	0	0	102	0	0	0	0	0	73	0	0	0	0	0	0	0	0	3	4	4	3	0	0	20	4	0	0	0	0	0	18	0	10	p__Chlorophyta	g__Chloromonas	s__Chloromonas_nivalis
ASV176	0	227	584	579	132	420	195	89	0	611	669	0	0	0	0	246	0	0	0	0	0	0	0	0	0	0	0	0	0	544	0	0	0	0	0	0	0	0	0	p__Bacillariophyta	g__Thalassiosira	s__Thalassiosira_tenera
ASV1758	0	0	0	0	0	0	0	0	0	0	0	0	0	0	0	0	0	0	0	0	0	0	0	0	0	0	0	0	0	0	47	67	0	0	0	0	38	37	56	p__Ciliophora	g__Cyclidium	s__Cyclidium_glaucoma
ASV1751	0	0	0	0	0	0	0	0	0	0	0	0	0	0	0	0	0	0	0	0	24	0	0	18	0	29	0	50	0	5	0	16	0	0	0	0	89	8	7	p__Chlorophyta	g__Pseudomuriella	s__Pseudomuriella_schumacherensis
ASV1745	0	0	0	0	0	0	0	0	146	0	0	0	0	0	0	0	0	0	0	0	0	0	0	0	0	0	100	0	0	0	0	0	0	0	0	0	0	0	0	p__Rotifera	g__Brachionus	s__Brachionus_calyciflorus
ASV1742	0	0	0	0	0	0	0	0	0	0	0	0	0	0	0	0	0	0	0	0	0	0	0	0	0	0	0	0	0	37	111	100	0	0	0	0	0	0	0	p__Bacillariophyta	g__Cyclotella	s__Cyclotella_meneghiniana
ASV1731	0	0	0	0	0	0	0	0	0	0	0	0	0	0	0	0	0	0	0	0	0	0	0	12	56	163	19	0	0	0	0	0	0	0	0	0	0	0	0	p__Chrysophyta	g__Synura	s__Synura_uvella
ASV173	0	0	0	0	0	0	217	27	0	6	0	0	0	0	0	0	0	0	0	0	0	25	0	61	111	98	222	112	0	82	368	76	2442	164	0	16	227	39	11	p__Rotifera	g__Ascomorpha	s__Ascomorpha_ovalis
ASV1729	0	0	0	0	0	0	0	0	0	0	0	0	0	0	0	0	0	0	0	0	0	0	0	87	0	64	82	0	0	0	17	0	0	0	0	0	0	0	0	p__Chlorophyta	g__Actinochloris	s__Actinochloris_sphaerica
ASV1728	0	0	0	0	0	0	0	0	0	0	0	0	0	0	0	0	0	0	0	0	0	0	0	0	0	0	0	0	0	0	174	76	0	0	0	0	0	0	0	p__Chlorophyta	g__Planktochlorella	s__Planktochlorella_nurekis
ASV1727	0	0	0	0	0	0	0	0	0	0	0	0	0	0	0	0	0	0	0	0	0	0	0	0	0	0	0	39	0	0	87	124	0	0	0	0	0	0	0	p__Chrysophyta	g__Mallomonas	s__Mallomonas_splendens
ASV1712	0	0	0	0	0	0	0	0	0	0	0	0	0	0	0	0	0	0	0	0	9	0	22	0	0	0	0	11	13	0	38	49	8	46	0	0	20	38	0	p__Euglenophyta	g__Euglenaria	s__Euglenaria_clavata
ASV1708	0	0	0	0	0	0	0	0	0	0	0	0	0	0	0	0	0	0	0	93	0	39	0	0	0	0	0	87	0	0	30	0	6	0	0	0	0	0	0	p__Chlorophyta	g__Pedinomonas	s__Pedinomonas_minor
ASV17	0	492	0	38	88	0	320	2161	25621	785	22	0	0	290	275	28	22	0	45	0	23	7	4	6	0	0	0	14	0	0	219	0	0	4	3	0	22	6	7	p__Chlorophyta	g__Cladophora	s__Cladophora_vagabunda
ASV1697	0	43	0	0	0	0	0	0	0	0	0	0	214	0	0	0	0	0	0	0	0	0	0	0	0	0	0	0	0	0	0	0	0	0	0	0	0	0	0	p__Bacillariophyta	g__Nitzschia	s__Nitzschia_thermalis
ASV1695	0	152	0	0	0	0	27	27	0	0	0	0	0	0	0	0	0	0	0	0	16	0	14	22	0	0	0	0	0	0	0	0	0	0	0	0	0	0	0	p__Chlorophyta	g__Coelastrum	s__Coelastrum_astroideum
ASV1692	0	0	0	0	0	0	0	0	0	33	0	0	0	0	0	0	0	0	0	0	0	0	0	0	0	21	24	0	0	0	30	57	0	0	0	17	25	0	51	p__Sarcomastigophora	g__Rhynchomonas	s__Rhynchomonas_nasuta
ASV1684	0	0	0	0	0	0	0	0	0	0	0	0	0	0	0	0	0	0	0	0	41	0	0	37	27	20	56	11	0	0	0	0	0	7	13	0	48	0	0	p__Ciliophora	g__Pelagothrix	s__Pelagothrix_alveolata
ASV1683	35	97	0	0	0	0	0	0	0	0	0	0	0	0	0	0	0	0	0	0	0	0	0	0	0	0	0	0	0	0	0	0	0	78	0	0	50	0	0	p__Chrysophyta	g__Dinobryon	s__Dinobryon_sociale
ASV1680	0	0	0	0	0	0	0	0	0	0	0	0	0	0	0	0	132	0	0	0	0	0	0	0	4	13	22	15	0	0	44	19	12	0	0	0	0	0	0	p__Cryptophyta	g__Goniomonas	s__Cryptomonas_tetrapyrenoidosa
ASV168	0	277	253	1588	84	109	232	45	160	468	0	0	0	0	0	0	0	0	0	590	94	77	87	155	163	8	10	17	0	56	0	0	0	0	12	0	4	14	0	p__Bacillariophyta	g__Skeletonema	s__Skeletonema_grevillei
ASV1676	0	0	0	0	0	0	0	0	0	44	0	0	0	0	0	0	0	0	0	0	55	0	16	42	0	19	22	14	0	0	33	0	0	0	0	0	17	0	0	p__Chlorophyta	g__Neochlorosarcina	s__Neochlorosarcina_negevensis
ASV1674	0	0	0	0	0	0	0	0	0	0	0	0	0	0	0	0	0	0	0	0	0	0	0	0	0	0	0	0	0	0	114	0	0	149	0	0	0	0	0	p__Ciliophora	g__Paramecium	s__Paramecium_multimicronucleatum
ASV1673	0	0	0	0	0	0	0	0	0	0	0	0	0	0	0	0	0	0	0	0	31	0	6	10	22	20	20	32	0	21	5	7	0	0	15	0	20	40	14	p__Ciliophora	g__Placus	s__Placus_salinus
ASV1672	0	0	65	0	0	0	0	0	0	0	0	0	0	0	0	0	0	0	0	0	65	0	43	53	0	37	0	0	0	0	0	0	0	0	0	0	0	0	0	p__Bacillariophyta	g__Aulacoseira	s__Aulacoseira_nyassensis
ASV1654	0	0	0	158	0	0	19	12	0	0	0	0	0	0	0	0	0	0	0	0	0	0	0	0	0	0	78	0	0	0	0	0	0	0	0	0	0	0	0	p__Bacillariophyta	g__Aulacoseira	s__Aulacoseira_granulata
ASV1651	0	0	0	0	0	0	0	0	0	0	0	0	0	0	0	0	0	0	0	0	27	0	68	57	116	0	0	0	0	0	0	0	0	0	0	0	0	0	0	p__Chlorophyta	g__Tetracystis	s__Tetracystis_pampae
ASV165	0	282	477	222	0	76	126	22	0	0	0	0	0	0	0	0	0	0	0	272	319	0	292	293	379	230	249	224	144	243	304	307	0	0	187	44	0	15	0	p__Chlorophyta	g__Gonium	s__Gonium_pectorale
ASV1642	0	0	0	0	0	0	0	0	0	0	0	0	0	0	0	0	0	0	0	26	44	0	0	0	0	56	29	18	0	25	27	0	0	0	0	0	45	0	0	p__Chlorophyta	g__Pandorina	s__Pandorina_morum
ASV1639	0	0	0	0	0	0	67	0	0	0	0	0	0	0	0	0	0	0	40	0	17	0	0	0	0	38	0	0	0	0	54	54	0	0	0	0	0	0	0	p__Chlorophyta	g__Chlamydomonas	s__Chlamydomonas_debaryana
ASV1637	0	0	0	0	0	0	0	0	0	0	0	0	0	0	0	0	0	0	0	0	0	0	0	0	22	30	15	21	0	0	39	57	6	0	30	0	51	0	0	p__Chlorophyta	g__Neochlorosarcina	s__Neochlorosarcina_negevensis
ASV1636	0	0	0	0	0	0	37	32	0	0	0	0	0	0	0	0	0	0	0	0	0	0	0	0	73	83	46	0	0	0	0	0	0	0	0	0	0	0	0	p__Rotifera	g__Synchaeta	s__Synchaeta_pectinata
ASV1635	0	0	0	0	0	35	0	0	0	0	0	0	0	0	0	0	0	0	0	0	50	0	26	0	0	19	26	25	0	0	54	0	0	0	36	0	0	0	0	p__Ciliophora	g__Tetrahymena	s__Tetrahymena_pigmentosa
ASV1630	0	0	0	0	0	0	0	0	0	0	0	0	0	0	0	0	196	0	0	0	0	0	0	15	0	25	0	0	0	0	36	0	0	0	0	0	0	0	0	p__Chlorophyta	g__Acutodesmus	s__Tetradesmus bajacalifornicus
ASV163	0	1378	2333	508	0	210	155	22	0	0	0	0	0	0	124	0	0	0	10	0	0	0	0	0	0	0	0	0	0	0	0	0	0	0	0	0	0	7	0	p__Bacillariophyta	g__Cymatopleura	s__Cymatopleura_solea
ASV1624	0	0	185	0	0	0	0	0	0	0	0	0	0	0	0	0	0	0	0	0	12	0	0	4	0	0	5	0	0	0	0	0	0	0	0	0	0	0	67	p__Ciliophora	g__Strombidinopsis	s__Strombidinopsis_sinicum
ASV160	0	0	103	0	0	0	0	0	0	63	0	0	0	0	0	0	0	0	0	0	35	0	56	53	0	0	0	11	0	302	309	3833	0	0	0	0	0	0	0	p__Bacillariophyta	g__Conticribra	s__Conticribra_weissflogiopsis
ASV1598	0	0	0	0	0	0	0	0	0	61	0	0	218	0	0	0	0	0	0	0	0	0	0	0	0	0	0	0	0	0	0	0	0	0	0	0	0	0	0	p__Bacillariophyta	g__Cyclotella	s__Cyclotella_meneghiniana
ASV1596	0	0	0	0	0	0	0	0	21	0	0	0	0	0	0	0	0	0	258	0	0	0	0	0	0	0	0	0	0	0	0	0	0	0	0	0	0	0	0	p__Chlorophyta	g__Pedinomonas	s__Pedinomonas_minor
ASV1594	0	150	0	0	0	0	0	0	0	0	0	0	0	0	0	0	0	0	0	0	0	4	0	12	20	0	0	0	0	35	0	0	0	0	0	59	0	0	0	p__Arthropoda	g__Daphnia	s__Daphnia_pulex
ASV159	0	0	0	0	0	0	0	0	0	0	0	0	0	0	0	0	0	0	0	0	0	0	65	159	549	2084	499	121	32	50	25	14	0	0	1156	0	0	18	0	p__Chlorophyta	g__Chlamydomonas	s__Chlamydomonas_sphagnophila
ASV1589	0	0	0	0	0	0	0	0	0	0	0	0	0	0	0	0	0	0	0	0	0	0	0	13	0	47	42	0	0	0	36	0	0	8	42	12	56	15	12	p__Chlorophyta	g__Chloromonas	s__Chloromonas_augustae
ASV1583	0	0	0	0	0	0	79	0	0	0	0	0	0	0	0	0	0	0	0	0	62	0	0	0	0	0	45	0	0	98	0	0	0	0	0	0	0	0	0	p__Chlorophyta	g__Micractinium	s__Micractinium_pusillum
ASV1582	0	0	0	0	0	0	0	0	0	0	0	0	0	0	0	0	0	0	0	0	0	0	0	0	0	0	0	0	0	105	142	38	0	0	0	0	0	0	0	p__Rotifera	g__Epiphanes	s__Epiphanes_senta
ASV1564	0	0	0	0	0	0	0	0	0	0	0	0	0	0	0	0	0	0	0	0	0	0	0	0	0	0	0	0	0	79	209	0	0	0	0	0	0	0	0	p__Rotifera	g__Microcodon	s__Microcodon_clavus
ASV1560	0	0	0	84	0	0	0	0	0	11	0	0	0	0	0	0	0	0	0	0	0	0	0	0	0	0	0	0	0	0	193	0	0	0	0	0	0	0	0	p__Ciliophora	g__Trachelius	s__Trachelius_ovum
ASV1556	0	0	0	0	0	0	0	0	0	0	0	0	0	0	0	0	0	0	0	0	0	54	0	0	0	0	28	40	0	0	0	0	0	39	0	0	25	49	54	p__Ciliophora	g__Pseudoplatyophrya	s__Pseudoplatyophrya_nana
ASV1555	0	0	0	0	0	0	0	0	0	0	0	0	0	0	0	0	267	0	0	0	0	0	0	0	0	0	12	10	0	0	0	0	0	0	0	0	0	0	0	p__Ciliophora	g__Stylonychia	s__Stylonychia_pustulata
ASV1545	0	0	0	0	0	0	38	0	0	0	0	0	0	0	0	0	0	0	0	0	0	0	0	43	125	0	87	0	0	0	0	0	0	0	0	0	0	0	0	p__Ciliophora	g__Paramecium	s__Paramecium_caudatum
ASV1543	0	0	0	0	0	0	0	0	0	0	0	0	0	0	0	0	0	0	0	0	0	0	0	0	0	2	0	0	0	0	46	34	0	211	0	0	0	2	0	p__Sarcomastigophora	g__Acanthamoeba	s__Acanthamoeba_genotype
ASV1541	0	0	0	0	0	0	122	0	0	61	0	0	0	0	0	21	0	0	38	0	0	0	0	0	38	0	0	0	0	0	15	0	0	0	0	0	0	0	0	p__Ciliophora	g__Oxytricha	s__Oxytricha_ferruginea
ASV1539	0	0	0	0	0	0	0	0	0	0	0	0	0	0	0	0	0	0	0	0	59	0	38	27	29	39	40	0	0	51	0	0	0	13	0	0	0	0	0	p__Chlorophyta	g__Spermatozopsis	s__Spermatozopsis_similis
ASV1535	0	50	0	0	0	0	0	0	247	0	0	0	0	0	0	0	0	0	0	0	0	0	0	0	0	0	0	0	0	0	0	0	0	0	0	0	0	0	0	p__Bacillariophyta	g__Sellaphora	s__Sellaphora_laevissima
ASV1530	0	0	0	0	0	0	0	0	0	9	0	0	0	0	0	0	0	0	0	0	0	0	0	0	0	0	0	0	0	0	0	0	0	0	0	0	4	0	286	p__Sarcomastigophora	g__Salpingoeca	s__Salpingoeca_urceolata
ASV153	0	0	0	0	0	0	0	0	0	0	0	0	0	0	0	0	0	0	0	0	53	7	29	34	402	322	312	18	0	13	38	26	0	2324	728	120	322	97	0	p__Chrysophyta	g__Synura	s__Synura_curtispina
ASV1523	0	0	0	0	0	0	0	0	0	0	0	0	0	0	0	0	0	0	0	0	0	0	0	0	74	97	131	0	0	0	0	0	0	0	0	0	0	0	0	p__Ciliophora	g__Obertrumia	s__Obertrumia_georgiana
ASV1522	0	54	0	0	0	0	0	0	0	0	0	0	0	0	0	0	0	0	0	0	28	0	16	46	0	25	0	37	30	0	14	17	0	0	0	0	24	11	0	p__Chlorophyta	g__Chlamydomonas	s__Chlamydomonas_applanata
ASV1521	0	116	0	0	0	0	8	0	0	0	0	0	0	0	0	0	0	0	0	0	19	0	0	26	23	15	11	8	70	0	0	0	0	0	0	0	0	0	7	p__Chrysophyta	g__Ochromonas	s__Ochromonas_danica
ASV152	0	0	0	0	0	0	0	0	0	0	0	0	0	0	0	0	0	0	0	4057	43	295	0	31	47	55	35	74	22	17	55	19	0	40	0	0	0	76	0	p__Chlorophyta	g__Vitreochlamys	s__Vitreochlamys_pinguis
ASV1517	0	0	0	0	0	0	0	0	0	0	0	0	0	0	0	0	0	0	0	0	0	0	0	0	0	0	0	0	63	100	36	40	0	0	0	0	0	0	65	p__Sarcomastigophora	g__Parabodo	s__Parabodo_nitrophilus
ASV1511	0	0	0	0	0	0	74	0	40	0	0	0	0	0	0	34	0	0	7	0	16	0	0	0	0	12	24	0	0	0	42	25	0	0	19	0	11	0	0	p__Cryptophyta	g__Goniomonas	s__Goniomonas_truncata
ASV1509	168	0	72	0	0	0	65	0	0	0	0	0	0	0	0	0	0	0	0	0	0	0	0	0	0	0	0	0	0	0	0	0	0	0	0	0	0	0	0	p__Ciliophora	g__Lagynophrya	s__Lagynophrya_acuminata
ASV1505	0	0	0	0	0	0	18	0	0	25	0	0	262	0	0	0	0	0	0	0	0	0	0	0	0	0	0	0	0	0	0	0	0	0	0	0	0	0	0	p__Sarcomastigophora	g__Rhynchomonas	s__Rhynchomonas_nasuta
ASV1500	0	0	307	0	0	0	0	0	0	0	0	0	0	0	0	0	0	0	0	0	0	0	0	0	0	0	0	0	0	0	0	0	0	0	0	0	0	0	0	p__Bacillariophyta	g__Cymatopleura	s__Cymatopleura_elliptica
ASV1494	0	0	0	0	0	0	0	0	0	8	0	199	0	0	0	0	0	0	23	0	0	15	8	11	0	0	10	5	0	0	0	0	0	0	0	16	13	0	0	p__Xanthophyta	g__Merotricha	s__Merotricha_bacillata
ASV1480	0	0	0	0	0	0	0	0	0	18	0	0	0	0	0	0	0	0	0	0	10	0	0	20	29	41	30	46	0	0	33	38	0	0	46	0	0	0	0	p__Ciliophora	g__Trithigmostoma	s__Trithigmostoma_steini
ASV1477	0	0	0	0	185	0	0	0	0	0	0	0	38	0	0	0	29	0	7	0	0	0	0	0	0	0	0	0	0	0	0	0	0	0	0	29	25	0	0	p__Sarcomastigophora	g__Neobodo	s__Neobodo_designis
ASV1476	297	0	0	0	0	0	0	0	0	0	0	0	0	0	0	0	0	0	0	0	0	0	0	0	0	0	0	0	0	0	7	10	0	0	0	0	0	0	0	p__Dinophyta	g__Polarella	s__Polarella_glacialis
ASV1475	0	0	0	0	0	0	0	33	0	0	0	0	0	0	0	0	0	0	0	0	53	0	16	24	0	0	0	0	0	0	52	0	0	0	36	0	60	28	13	p__Chlorophyta	g__Pandorina	s__Pandorina_morum
ASV1473	0	0	0	48	0	0	0	0	0	0	0	0	0	0	0	0	0	0	0	0	32	0	27	0	71	0	137	0	0	0	0	0	0	0	0	0	0	0	0	p__Rotifera	g__Brachionus	s__Brachionus_plicatilis
ASV147	0	0	0	108	0	53	0	0	0	0	0	0	0	0	0	0	0	0	0	1371	240	96	386	944	211	547	716	55	0	19	176	0	0	0	17	0	0	19	0	p__Chlorophyta	g__Hafniomonas	s__Hafniomonas_reticulata
ASV1466	0	0	0	0	0	0	0	16	0	0	209	0	0	0	0	0	0	0	0	0	0	0	0	0	0	0	0	0	0	0	78	14	0	0	0	0	0	0	0	p__Bacillariophyta	g__Gomphonema	s__Gomphonema_micropus
ASV1464	0	0	0	0	0	0	0	0	0	0	0	0	0	0	0	0	0	0	0	0	0	0	0	24	15	0	0	0	0	0	29	37	213	0	0	0	0	0	0	p__Ciliophora	g__Urosoma	s__Urosoma_karinae
ASV1459	0	0	0	0	0	0	0	0	0	0	0	0	0	0	0	0	0	0	0	0	49	13	56	50	25	87	14	26	0	0	0	0	0	0	0	0	0	0	0	p__Ciliophora	g__Coleps	s__Coleps_hirtus
ASV1454	0	0	0	0	0	0	0	0	0	0	0	0	0	0	0	0	0	0	0	0	52	0	42	43	46	15	28	0	0	0	0	0	0	0	68	20	0	0	9	p__Ciliophora	g__Apobryophyllum	s__Apobryophyllum_schmidingeri
ASV1451	0	0	67	0	0	0	15	13	0	0	0	0	0	0	0	0	0	0	0	0	38	0	81	76	33	0	0	0	0	0	0	0	0	0	0	0	0	0	0	p__Chlorophyta	g__Monactinus	s__Monactinus_sturmii
ASV145	0	73	0	0	236	0	0	0	0	43	0	0	0	0	0	0	0	0	0	86	148	0	95	128	193	194	204	231	146	971	537	941	127	153	39	0	238	179	53	p__Chlorophyta	g__Chlamydomonas	s__Chlamydomonas_noctigama
ASV1445	0	0	0	0	0	0	0	0	0	0	0	0	0	0	0	0	0	0	301	0	0	0	0	0	0	0	0	0	0	0	24	0	0	0	0	0	0	0	0	p__Chrysophyta	g__Paraphysomonas	s__Paraphysomonas_foraminifera
ASV1443	0	0	0	0	0	0	0	133	0	0	0	0	0	0	0	0	136	0	0	0	0	0	0	0	0	0	0	0	0	0	0	0	0	0	0	0	0	0	57	p__Chlorophyta	g__Chlorella	s__Chlorella_vulgaris
ASV1441	0	0	0	0	0	0	0	6	0	0	0	0	0	0	0	0	0	0	0	0	0	0	0	0	0	0	37	0	0	0	161	62	61	0	0	0	0	0	0	p__Bacillariophyta	g__Fragilariforma	s__Fragilariforma_virescens
ASV1440	0	96	41	0	0	0	0	0	0	0	0	0	0	0	0	0	0	0	0	0	0	36	0	0	0	0	30	57	0	0	0	0	0	25	0	0	0	32	10	p__Ciliophora	g__Hemiophrys	s__Hemiophrys_procera
ASV1439	0	0	0	0	0	0	0	0	0	0	0	0	0	327	0	0	0	0	0	0	0	0	0	0	0	0	0	0	0	0	0	0	0	0	0	0	0	0	0	p__Sarcomastigophora	g__Angulamoeba	s__Angulamoeba_microcystivorans
ASV1436	0	0	0	0	0	0	0	0	0	0	0	0	0	0	0	0	0	0	0	0	12	0	0	0	35	31	24	0	0	0	0	0	0	0	124	102	0	0	0	p__Cryptophyta	g__Chroomonas	s__Chroomonas_vectensis
ASV1432	58	0	0	0	0	0	0	0	0	0	0	0	0	0	0	0	0	0	0	0	0	0	0	0	40	0	0	0	0	0	0	0	0	0	25	207	0	0	0	p__Arthropoda	g__Daphnia	s__Daphnia_pulex
ASV1424	0	0	0	0	0	0	0	0	0	0	0	0	0	0	0	0	0	0	0	0	0	0	17	0	0	30	0	99	21	0	88	39	0	0	39	0	0	0	0	p__Chlorophyta	g__Chlamydomonas	s__Chlamydomonas_reinhardtii
ASV1422	0	0	0	0	0	0	0	0	0	0	0	0	0	0	0	0	0	0	0	279	0	55	0	0	0	0	0	0	0	0	0	0	0	0	0	0	0	0	0	p__Chlorophyta	g__Yamagishiella	s__Yamagishiella_unicocca
ASV1414	0	0	0	0	0	0	31	0	0	0	0	0	0	0	0	0	0	0	0	0	0	0	49	85	0	109	0	0	0	0	36	26	0	0	0	0	0	0	0	p__Ciliophora	g__Stichotricha	s__Stichotricha_aculeata
ASV141	32	0	0	0	0	0	0	0	0	0	0	0	0	0	0	0	0	0	0	89	2021	25	924	797	319	361	271	0	40	0	49	0	0	0	139	0	0	0	0	p__Chlorophyta	g__Tetranephris	s__Tetranephris_brasiliensis
ASV1405	0	0	0	0	0	0	8	0	0	0	0	0	0	0	0	0	0	0	23	0	66	0	30	25	57	41	55	0	11	11	0	0	0	0	0	0	11	0	0	p__Chrysophyta	g__Poterioochromonas	s__Poterioochromonas_stipitata
ASV1404	0	0	0	0	119	0	0	0	0	0	0	0	0	0	0	0	0	0	32	0	14	0	0	9	0	8	5	0	0	15	21	26	0	0	0	0	42	7	40	p__Sarcomastigophora	g__Rhynchomonas	s__Rhynchomonas_nasuta
ASV1403	0	0	0	0	0	0	0	0	0	0	0	0	0	0	0	0	0	0	0	0	0	0	0	0	0	0	0	0	306	0	0	0	0	0	15	18	0	0	0	p__Chrysophyta	g__Poteriospumella	s__Poteriospumella_lacustris
ASV140	0	0	244	0	0	0	32	0	0	0	209	0	0	0	0	0	0	0	0	319	78	31	154	292	219	586	426	812	209	211	89	160	0	16	205	50	404	373	0	p__Chlorophyta	g__Actinochloris	s__Actinochloris_sphaerica
ASV1396	0	0	0	0	0	0	0	0	0	0	0	0	0	0	0	0	0	0	0	0	0	0	0	29	0	48	44	25	13	36	0	0	0	0	124	23	0	0	0	p__Chlorophyta	g__Chlamydomonas	s__Chlamydomonas_splendida
ASV1395	0	0	0	209	0	0	0	0	0	0	0	0	0	0	0	0	0	0	0	0	0	0	0	0	0	0	16	0	0	70	0	47	0	0	0	0	0	0	0	p__Chlorophyta	g__Chlamydomonas	s__Chlamydomonas_reinhardtii
ASV1389	0	0	0	0	0	0	0	0	0	61	0	0	0	0	0	0	0	0	106	19	0	0	45	0	53	0	59	0	0	0	0	0	0	0	0	0	0	0	0	p__Ciliophora	g__Tachysoma	s__Tachysoma_pellionellum
ASV138	77	0	0	121	589	312	98	129	0	65	0	0	172	445	0	76	1693	0	738	0	13	0	8	7	23	9	13	5	266	114	15	97	0	0	0	17	15	6	0	p__Chrysophyta	g__Pedospumella	s__Pedospumella_encystans
ASV1376	0	0	0	0	0	0	0	0	0	0	0	0	0	0	43	0	266	0	0	0	0	0	0	0	0	0	0	0	0	0	0	39	0	0	0	0	0	0	0	p__Euglenophyta	g__Lepocinclis	s__Lepocinclis_oxyuris
ASV1371	0	0	0	0	0	0	350	0	0	0	0	0	0	0	0	0	0	0	0	0	0	0	0	0	0	0	0	0	0	0	0	0	0	0	0	0	0	0	0	p__Rotifera	g__Testudinella	s__Testudinella_patina
ASV1366	94	0	0	0	0	47	133	0	0	0	0	0	0	0	0	0	0	0	19	0	0	0	9	0	9	0	16	5	0	8	11	0	0	0	0	0	0	0	0	p__Cryptophyta	g__Goniomonas	s__Cryptomonas_curvata
ASV1365	0	0	0	0	0	0	19	0	0	0	0	0	0	0	0	0	0	0	44	0	0	0	0	0	12	15	27	16	0	26	50	142	0	0	0	0	0	0	0	p__Dinophyta	g__Woloszynskia	s__Woloszynskia_pascheri
ASV1364	0	0	0	0	0	0	0	0	0	0	0	0	0	0	0	0	0	0	0	0	0	0	0	0	0	0	0	0	0	45	0	0	0	0	0	0	52	10	245	p__Sarcomastigophora	g__Parabodo	s__Parabodo_caudatus
ASV136	3249	104	0	101	241	111	183	8	0	51	0	151	0	0	0	0	635	0	76	0	0	0	17	15	0	0	42	0	33	24	21	31	34	14	0	0	0	4	16	p__Chrysophyta	g__Paraphysomonas	s__Paraphysomonas_imperforata
ASV1356	147	0	0	0	0	0	52	0	0	0	0	0	0	0	0	0	122	0	0	0	14	0	0	0	0	0	0	0	0	0	0	0	0	0	0	13	0	6	0	p__Cryptophyta	g__Goniomonas	s__Cryptomonas_curvata
ASV1355	0	0	0	0	0	0	0	0	0	50	0	0	0	0	0	17	0	0	27	0	0	7	0	0	0	0	20	0	0	0	49	19	0	0	35	0	66	0	64	p__Chlorophyta	g__Chlamydomonas	s__Chlamydomonas_sordida
ASV1353	0	0	148	108	0	0	0	0	51	15	0	0	0	0	0	32	0	0	0	0	0	0	0	0	0	0	0	0	0	0	0	0	0	0	0	0	0	0	0	p__Cryptophyta	g__Goniomonas	s__Cryptomonas_ovata
ASV1348	0	0	0	0	0	0	0	0	0	0	0	0	0	0	0	0	0	0	0	0	55	0	0	36	31	82	152	0	0	0	0	0	0	0	0	0	0	0	0	p__Bacillariophyta	g__Cyclotella	s__Cyclotella_meneghiniana
ASV1345	0	0	0	0	0	31	19	16	0	0	89	0	0	0	0	0	0	0	17	0	0	0	0	0	18	17	0	0	0	0	36	29	0	0	0	0	0	0	84	p__Sarcomastigophora	g__Parabodo	s__Parabodo_caudatus
ASV1344	0	0	0	0	0	0	0	0	0	0	0	0	0	0	0	0	0	0	0	0	116	0	0	97	0	69	75	0	0	0	0	0	0	0	0	0	0	0	0	p__Bacillariophyta	g__Cyclotella	s__Cyclotella_meneghiniana
ASV1340	0	0	0	0	0	0	0	0	0	0	0	0	0	0	0	0	92	0	0	0	0	0	0	0	24	17	33	0	0	22	56	69	33	0	0	0	0	14	0	p__Chrysophyta	g__Mallomonas	s__Mallomonas_akrokomos
ASV1335	0	0	0	0	0	0	0	0	0	24	0	0	0	0	0	57	0	0	0	0	0	0	0	0	0	0	0	0	0	0	0	0	0	82	0	0	94	50	54	p__Bacillariophyta	g__Navicula	s__Navicula_cryptocephala
ASV1325	0	0	0	0	0	0	0	0	0	241	0	0	0	0	0	38	0	0	0	0	0	0	0	0	0	0	13	12	0	34	17	10	0	0	0	0	0	0	0	p__Ciliophora	g__Lembadion	s__Lembadion_bullinum
[truncated: 399 more rows]
