# Supplementary material for: Eukaryotic plankton species diversity and community structure in the Xiao Jiang River (the primary tributary of Upper Yangtze River), Yunnan
Source: PeerJ journal article supplement (doi:10.7717/peerj.17972), 2024-09-13
Supplement: Table_S2.xlsx [file Table_S2.xlsx]

## Sheet: Sheet1
Samples	WT	DO	pH	CODcr	NH3-N	TN	TP	EC	NO3-N	PO43-P	Chl a	ORP
Dry_XJ01	21.3667	9.7	8.4	29	0.058	4.71	0.03	505	0.6	0.1	4	58
Dry_XJ02	22.9	7.73333	8.1	15	0.061	5.25	0.02	615	1.38	0	4	70
Dry_XJ03	22.7	7.56667	8.2	15	0.448	4.94	0.8	611	1.78	0.1	5	88
Dry_XJ04	21.9667	7.36667	8.2	16	0.072	5.37	0.06	497	1.17	0.1	9	67
Dry_XJ05	22.4667	7.4	8.3	7	0.055	5.01	0.05	463	1.07	0.1	6	78
Dry_XJ06	21.9667	7.1	8.2	24	0.219	5.04	0.07	437	1.24	0.2	9	86
Dry_XJ07	22.9333	7.16667	8.1	18	0.058	5.65	0.07	458	1.25	0.1	7	80
Dry_XJ08	21.8667	6.23333	7.9	27	0.109	5.6	0.1	497	1.66	0.2	6	92
Dry_DBH09	20.8667	6.96667	8.1	12	0.027	4.8	0.05	574	1.08	0	4	79
Dry_DBH10	22.1	7.73333	8.2	6	0.064	5.19	0.04	486	1.1	0	4	97
Dry_DBH11	26	7.76667	8.4	5	0.044	5.35	0.07	304	0.83	0.2	8	82
Dry_DBH12	16.9333	8.2	8.7	20	0.216	3.82	0.08	167	0.76	0.2	5	119
Dry_DBH13	17.2667	10.5333	9.1	18	0.408	4.38	0.08	384	0.95	0.2	10	88
Dry_DBH15	15.7667	6.1	7.9	8	0.085	4.99	0.02	286	0.52	0	0	92
Dry_KH16	19.1333	7.86667	8.3	8	0.044	5.41	0.02	373	1.64	0	9	88
Dry_KH17	19.4333	8.23333	8.2	18	0.072	4.84	0.06	444	1.88	0.1	4	158
Dry_KH18	18.8333	7.93333	8.6	27	0.092	4.79	0.05	303	1.2	0.1	5	145
Dry_KH19	19.7333	7.96667	8.7	12	0.148	4.49	0.09	286	1.31	0.1	3	154
Dry_KH20	16.7667	7.1	8	10	0.202	5.22	0.09	205	3.03	0.1	4	159
Wet_XJ01	25	7.5	7.4	22	0.374	1.84	0.1	328	1.4	0	0	200
Wet_XJ02	24.6	7.6	7.5	26	0.976	1.56	2	404	0.6	0.2	3	200
Wet_XJ03	25.6	5.1	6.7	16	0.246	2.47	0.02	472	2.6	0	0	214
Wet_XJ04	24.3	7.5	7.5	16	0.2	2.07	1.23	351	1.5	0.3	3	191
Wet_XJ05	24.3	7.1	7.4	21	0.191	1.63	1.17	357	1.4	0.3	3	206
Wet_XJ06	22.2	7.2	7.4	34	0.198	2.07	1.1	329	1.5	0.4	15	205
Wet_XJ07	21.9	7.4	7.4	26	0.244	2.47	1.11	350	1.8	0.3	8	205
Wet_XJ08	21.8	6.8	7.3	28	0.256	2.57	2.75	394	1.8	0.3	14	214
Wet_DBH09	21.8	7	7.5	34	0.183	2.23	2.19	437	1.5	0.4	19	200
Wet_DBH10	21.6	7.5	6.8	5	0.922	3.58	0.47	408	1.5	0	2	193
Wet_DBH11	20.6	7.2	7.4	5	0.21	3.36	0.3	314	1.7	0	3	200
Wet_DBH12	20.5	6.9	7.5	9	0.057	1.81	0.1	245	1.9	0	0	187
Wet_DBH13	20.3	7	7.3	6	0.064	4.04	0.16	313	2.8	0	2	190
Wet_DBH14	21.6	6.6	7.4	5	0.159	1.58	0.04	225	1	0	2	194
Wet_DBH15	20.8	6.4	7.2	13	0.044	1.48	0.31	254	1.2	0	7	181
Wet_KH16	17.2	6.6	7.4	26	0.152	2.11	0.6	252	1.6	0.2	7	206
Wet_KH17	20.7	6.9	7.2	14	0.05	2.21	0.37	249	1.6	0	10	177
Wet_KH18	19.4	7.2	7.5	6	0.034	1.65	0.28	236	1.6	0	7	188
Wet_KH19	19.8	7.1	7.5	5	0.03	3.08	0.15	224	1.6	0	4	200
Wet_KH20	23.7	6.4	7.2	5	0.041	1.34	0.16	136	1.3	0	9	191
