# Supplementary material for: Eukaryotic plankton species diversity and community structure in the Xiao Jiang River (the primary tributary of Upper Yangtze River), Yunnan
Source: PeerJ journal article supplement (doi:10.7717/peerj.17972), 2024-09-13
Supplement: Table_S3.xlsx [file Table_S3.xlsx]

## Sheet: Sheet1
Accession	BioProject	BioSample	SRA.filename
SRR23727948	PRJNA941381	SAMN33581867	DBH12_Dry_raw_L001_R1_001.fastq, DBH12_Dry_raw_L001_R2_001.fastq
SRR23727949	PRJNA941381	SAMN33581866	DBH11_Dry_raw_L001_R1_001.fastq, DBH11_Dry_raw_L001_R2_001.fastq
SRR23727950	PRJNA941381	SAMN33581857	XJ02_Dry_raw_L001_R1_001.fastq, XJ02_Dry_raw_L001_R2_001.fastq
SRR23727951	PRJNA941381	SAMN33581856	XJ01_Dry_raw_L001_R1_001.fastq, XJ01_Dry_raw_L001_R2_001.fastq
SRR23727913	PRJNA941381	SAMN33581865	DBH10_Dry_raw_L001_R1_001.fastq, DBH10_Dry_raw_L001_R2_001.fastq
SRR23727914	PRJNA941381	SAMN33581864	DBH09_Dry_raw_L001_R1_001.fastq, DBH09_Dry_raw_L001_R2_001.fastq
SRR23727915	PRJNA941381	SAMN33581863	XJ08_Dry_raw_L001_R1_001.fastq, XJ08_Dry_raw_L001_R2_001.fastq
SRR23727916	PRJNA941381	SAMN33581862	XJ07_Dry_raw_L001_R1_001.fastq, XJ07_Dry_raw_L001_R2_001.fastq
SRR23727917	PRJNA941381	SAMN33581861	XJ06_Dry_raw_L001_R1_001.fastq, XJ06_Dry_raw_L001_R2_001.fastq
SRR23727918	PRJNA941381	SAMN33581860	XJ05_Dry_raw_L001_R1_001.fastq, XJ05_Dry_raw_L001_R2_001.fastq
SRR23727919	PRJNA941381	SAMN33581894	KH20_Wet_raw_L001_R1_001.fastq, KH20_Wet_raw_L001_R2_001.fastq
SRR23727920	PRJNA941381	SAMN33581893	KH19_Wet_raw_L001_R1_001.fastq, KH19_Wet_raw_L001_R2_001.fastq
SRR23727921	PRJNA941381	SAMN33581892	KH18_Wet_raw_L001_R1_001.fastq, KH18_Wet_raw_L001_R2_001.fastq
SRR23727922	PRJNA941381	SAMN33581891	KH17_Wet_raw_L001_R1_001.fastq, KH17_Wet_raw_L001_R2_001.fastq
SRR23727939	PRJNA941381	SAMN33581858	XJ03_Dry_raw_L001_R1_001.fastq, XJ03_Dry_raw_L001_R2_001.fastq
SRR23727940	PRJNA941381	SAMN33581875	XJ01_Wet_raw_L001_R1_001.fastq, XJ01_Wet_raw_L001_R2_001.fastq
SRR23727941	PRJNA941381	SAMN33581874	KH20_Dry_raw_L001_R1_001.fastq, KH20_Dry_raw_L001_R2_001.fastq
SRR23727942	PRJNA941381	SAMN33581873	KH19_Dry_raw_L001_R1_001.fastq, KH19_Dry_raw_L001_R2_001.fastq
SRR23727943	PRJNA941381	SAMN33581872	KH18_Dry_raw_L001_R1_001.fastq, KH18_Dry_raw_L001_R2_001.fastq
SRR23727944	PRJNA941381	SAMN33581871	KH17_Dry_raw_L001_R1_001.fastq, KH17_Dry_raw_L001_R2_001.fastq
SRR23727945	PRJNA941381	SAMN33581870	KH16_Dry_raw_L001_R1_001.fastq, KH16_Dry_raw_L001_R2_001.fastq
SRR23727946	PRJNA941381	SAMN33581869	DBH15_Dry_raw_L001_R1_001.fastq, DBH15_Dry_raw_L001_R2_001.fastq
SRR23727947	PRJNA941381	SAMN33581868	DBH13_Dry_raw_L001_R1_001.fastq, DBH13_Dry_raw_L001_R2_001.fastq
SRR23727923	PRJNA941381	SAMN33581890	KH16_Wet_raw_L001_R1_001.fastq, KH16_Wet_raw_L001_R2_001.fastq
SRR23727924	PRJNA941381	SAMN33581889	DBH15_Wet_raw_L001_R1_001.fastq, DBH15_Wet_raw_L001_R2_001.fastq
SRR23727925	PRJNA941381	SAMN33581888	DBH14_Wet_raw_L001_R1_001.fastq, DBH14_Wet_raw_L001_R2_001.fastq
SRR23727926	PRJNA941381	SAMN33581887	DBH13_Wet_raw_L001_R1_001.fastq, DBH13_Wet_raw_L001_R2_001.fastq
SRR23727927	PRJNA941381	SAMN33581886	DBH12_Wet_raw_L001_R1_001.fastq, DBH12_Wet_raw_L001_R2_001.fastq
SRR23727928	PRJNA941381	SAMN33581859	XJ04_Dry_raw_L001_R1_001.fastq, XJ04_Dry_raw_L001_R2_001.fastq
SRR23727929	PRJNA941381	SAMN33581885	DBH11_Wet_raw_L001_R1_001.fastq, DBH11_Wet_raw_L001_R2_001.fastq
SRR23727930	PRJNA941381	SAMN33581884	DBH10_Wet_raw_L001_R1_001.fastq, DBH10_Wet_raw_L001_R2_001.fastq
SRR23727931	PRJNA941381	SAMN33581883	DBH09_Wet_raw_L001_R1_001.fastq, DBH09_Wet_raw_L001_R2_001.fastq
SRR23727932	PRJNA941381	SAMN33581882	XJ08_Wet_raw_L001_R1_001.fastq, XJ08_Wet_raw_L001_R2_001.fastq
SRR23727933	PRJNA941381	SAMN33581881	XJ07_Wet_raw_L001_R1_001.fastq, XJ07_Wet_raw_L001_R2_001.fastq
SRR23727934	PRJNA941381	SAMN33581880	XJ06_Wet_raw_L001_R1_001.fastq, XJ06_Wet_raw_L001_R2_001.fastq
SRR23727935	PRJNA941381	SAMN33581879	XJ05_Wet_raw_L001_R1_001.fastq, XJ05_Wet_raw_L001_R2_001.fastq
SRR23727936	PRJNA941381	SAMN33581878	XJ04_Wet_raw_L001_R1_001.fastq, XJ04_Wet_raw_L001_R2_001.fastq
SRR23727937	PRJNA941381	SAMN33581877	XJ03_Wet_raw_L001_R1_001.fastq, XJ03_Wet_raw_L001_R2_001.fastq
SRR23727938	PRJNA941381	SAMN33581876	XJ02_Wet_raw_L001_R1_001.fastq, XJ02_Wet_raw_L001_R2_001.fastq
